# Supplementary material
Source: PubMed Central journal article supplement (PMC5084063)

# Supporting Information

## Highly Efficient Cascade Reaction for Selective Formation of Spirocyclobutenes from Dienallenes via Palladium-Catalyzed Oxidative Double Carbocyclization-Carbonylation-Alkynylation

Youai Qiu, Bin Yang, Can Zhu, and Jan-E. Bäckvall\*

*Department of Organic Chemistry, Arrhenius Laboratory, Stockholm University,  
SE-10691 Stockholm Sweden*

### Table of Contents

|                                                                      |          |
|----------------------------------------------------------------------|----------|
| General information                                                  | S1       |
| Typical procedure for the preparation of starting materials <b>1</b> | S2-S8    |
| Optimization of Oxidative Carbocyclization of Dienallenes            | S9       |
| Typical procedure for the formation of compounds <b>3</b>            | S10-S20  |
| Typical procedure for the formation of compounds <b>4</b>            | S21-S25  |
| Kinetic Isotope Effect (KIE) Experiments                             | S26-S29  |
| The spiro[3,4]octene derivatives <b>3</b> as single isomers          | S30-31   |
| References                                                           | S32      |
| <sup>1</sup> H NMR and <sup>13</sup> C NMR spectra for compounds     | S33-S115 |

### ***General information***

Unless otherwise noted, all reagents were used as received from commercial suppliers. Pd(TFA)<sub>2</sub> was obtained from Pressure Chemicals and used without further purification. THF and toluene were obtained from a VAC Solvent Purifier. Reactions were monitored using thin-layer chromatography (SiO<sub>2</sub>). TLC plates were visualized with UV light (254 nm) or KMnO<sub>4</sub> stain. Flash chromatography was carried out with 60Å (particle size 35-70 µm) normal flash silica gel. NMR spectra were recorded at 400 MHz (<sup>1</sup>H) or 500 MHz (<sup>1</sup>H) and at 100 MHz (<sup>13</sup>C) or 125 MHz (<sup>13</sup>C), respectively. Chemical shifts (δ) are reported in ppm, using the residual solvent peak in CDCl<sub>3</sub> (H = 7.26 and C = 77.0 ppm) as internal standard, and coupling constants (*J*) are given in Hz. HRMS were recorded using ESI-TOF techniques.

## General procedure for the preparation of starting materials<sup>[1]</sup>

### Preparation of allenes 1a~1f and 1k.

#### Ethyl 5-methylene-3-(2-methylprop-1-en-1-ylidene)non-8-enoate (**1a**)

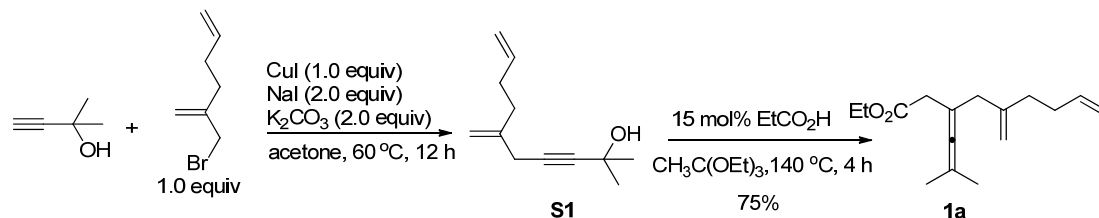

To a three-necked flask were added 2-(bromomethyl)hexa-1,5-diene<sup>[2]</sup> (522 mg, 3 mmol), 2-methylbut-3-yn-2-ol (252 mg, 3 mmol), CuI (571 mg, 3 mmol), NaI (899 mg, 6 mmol), K<sub>2</sub>CO<sub>3</sub> (829 mg, 6 mmol), and acetone (10 mL). After full consumption of starting material as monitored by TLC at 60 °C (12 h) the reaction mixture was filtered to remove precipitates. Evaporation of the solvent afforded the crude product **S1**, which was used as the starting material in the next step without further purification and characterization.

A dry round-bottomed flask was equipped with a distillation receiver and a condenser. Propargylic alcohol **S1** (493 mg, 3 mmol), triethyl orthoacetate (6 mL), and propanoic acid (33 mg, 0.45 mmol) were added sequentially. After the reaction was refluxed for 4 h, the mixture was cooled down to 0 °C in an ice bath. Et<sub>2</sub>O (50 mL) and HCl (aq., 1 M, 20 mL) were added. The organic layer was separated, and the aqueous layer was extracted with Et<sub>2</sub>O (2 × 50 mL). The combined organic layers were dried over Na<sub>2</sub>SO<sub>4</sub>, filtered, concentrated in vacuo, and purified via column chromatography on silica gel (eluent: petroleum ether/ethyl ether = 100/1~50/1) to afford the desired product **1a** (558 mg, 75% for two steps): colorless oil. <sup>1</sup>H NMR (400 MHz, CDCl<sub>3</sub>) δ 5.87-5.75 (m, 1H), 5.06-4.92 (m, 2H), 4.84-4.78 (m, 2H), 4.11 (q, *J* = 7.1 Hz, 2H), 2.87 (s, 2H), 2.75 (s, 2H), 2.23-2.08 (m, 4H), 1.67 (s, 6H), 1.25 (t, *J* = 7.1 Hz, 3H); <sup>13</sup>C NMR (100 MHz, CDCl<sub>3</sub>) δ 201.2, 171.7, 146.2, 138.5, 114.4, 111.7, 95.7, 93.2, 60.4, 41.0, 38.1, 34.3, 31.8, 20.5, 14.2; HRMS (ESI): calc. for C<sub>16</sub>H<sub>24</sub>NaO<sub>2</sub> [M+Na]<sup>+</sup>: 271.1669; found: 271.1678.

The general method from above was used for the preparation of the following

dinenes:

[D<sub>6</sub>]- Ethyl 5-methylene-3-(2-methylprop-1-en-1-ylidene)non-8-enoate (**1a-d<sub>6</sub>**)

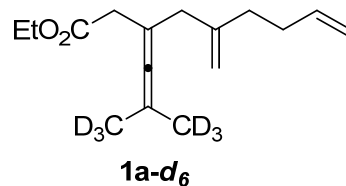

58% isolated yield, colorless oil. <sup>1</sup>H NMR (400 MHz, CDCl<sub>3</sub>) δ 5.87-5.74 (m, 1H), 5.05-4.92 (m, 2H), 4.84-4.79 (m, 2H), 4.11 (q, *J* = 7.2 Hz, 2H), 2.87 (s, 2H), 2.75 (s, 2H), 2.24-2.08 (m, 4H), 1.25 (t, *J* = 7.1 Hz, 3H); <sup>13</sup>C NMR (100 MHz, CDCl<sub>3</sub>) δ 201.2, 171.7, 146.2, 138.5, 114.4, 111.7, 93.2, 60.4, 41.0, 38.1, 34.3, 31.8, 14.2; HRMS (ESI): calc. for C<sub>16</sub>H<sub>18</sub>D<sub>6</sub>NaO<sub>2</sub> [M+Na]<sup>+</sup>: 277.2045; found: 277.2046.

Ethyl 3-(cyclopentylidenemethylene)-5-methylenenon-8-enoate (**1b**)

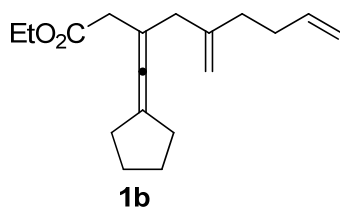

56% isolated yield, colorless oil. <sup>1</sup>H NMR (400 MHz, CDCl<sub>3</sub>) δ 5.88-5.74 (m, 1H), 5.06-4.91 (m, 2H), 4.86-4.75 (m, 2H), 4.11 (q, *J* = 7.1 Hz, 2H), 2.90 (s, 2H), 2.77 (s, 2H), 2.36-2.27 (m, 4H), 2.24-2.08 (m, 4H), 1.68-1.61 (m, 4H), 1.25 (t, *J* = 7.1 Hz, 3H); <sup>13</sup>C NMR (100 MHz, CDCl<sub>3</sub>) δ 196.7, 171.7, 146.2, 138.5, 114.4, 111.6, 104.4, 95.8, 60.4, 41.2, 38.3, 34.3, 31.8, 30.9, 27.0, 14.2; HRMS (ESI): calc. for C<sub>18</sub>H<sub>26</sub>NaO<sub>2</sub> [M+Na]<sup>+</sup>: 297.1825; found: 297.1831.

Ethyl 3-(cyclohexylidenemethylene)-5-methylenenon-8-enoate (**1c**)

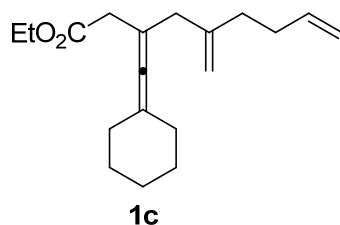

55% isolated yield, colorless oil. <sup>1</sup>H NMR (400 MHz, CDCl<sub>3</sub>) δ 5.86-5.74 (m, 1H), 5.05-4.89 (m, 2H), 4.82-4.72 (m, 2H), 4.11 (q, *J* = 7.2 Hz, 2H), 2.88 (s, 2H), 2.76 (s, 2H), 2.23-2.05 (m, 8H), 1.62-1.45 (m, 6H), 1.24 (t, *J* = 7.2 Hz, 3H); <sup>13</sup>C NMR (100

MHz, CDCl<sub>3</sub>)  $\delta$  197.7, 171.7, 146.3, 138.5, 114.4, 111.7, 103.2, 3.0, 60.4, 41.2, 38.4, 34.3, 31.8, 31.5, 27.6, 26.1, 14.2; HRMS (ESI): calc. for C<sub>19</sub>H<sub>28</sub>NaO<sub>2</sub> [M+Na]<sup>+</sup>: 311.1982; found: 311.1991.

*Ethyl 3-(cyclooctylidenemethylene)-5-methylenenon-8-enoate (1d)*

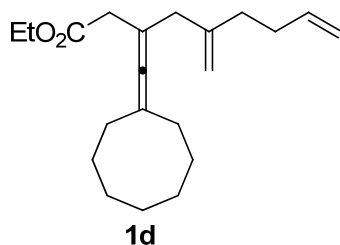

59% isolated yield, colorless oil. <sup>1</sup>H NMR (400 MHz, CDCl<sub>3</sub>)  $\delta$  5.89-5.74 (m, 1H), 5.07-4.91 (m, 2H), 4.87-4.78 (m, 2H), 4.12 (q, *J* = 7.2 Hz, 2H), 2.89 (s, 2H), 2.77 (s, 2H), 2.25-2.09 (m, 8H), 1.70-1.47 (m, 10H), 1.25 (t, *J* = 7.1 Hz, 3H); <sup>13</sup>C NMR (100 MHz, CDCl<sub>3</sub>)  $\delta$  201.5, 171.8, 146.2, 138.5, 114.4, 111.8, 105.0, 93.6, 60.4, 40.7, 37.9, 34.3, 31.9, 31.7, 27.0, 26.8, 26.2, 14.2; HRMS (ESI): calc. for C<sub>21</sub>H<sub>32</sub>NaO<sub>2</sub> [M+Na]<sup>+</sup>: 339.2295; found: 339.2287.

*Ethyl 5-methylene-3-(2-phenylprop-1-en-1-ylidene)non-8-enoate (1e)*

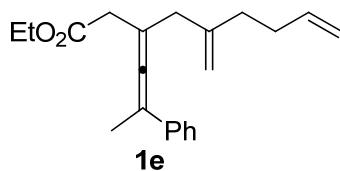

36% isolated yield, colorless oil. <sup>1</sup>H NMR (400 MHz, CDCl<sub>3</sub>)  $\delta$  7.47-7.40 (m, 2H), 7.34-7.29 (m, 2H), 7.23-7.17 (m, 1H), 5.86-5.70 (m, 1H), 5.04-4.84 (m, 4H), 4.19-4.05 (m, 2H), 3.06 (s, 2H), 2.93 (d, *J* = 14.8 Hz, 1H), 2.89 (d, *J* = 14.8 Hz, 1H), 2.22-2.14 (m, 4H), 2.1 (s, 3H), 1.23 (t, *J* = 7.1 Hz, 3H); <sup>13</sup>C NMR (100 MHz, CDCl<sub>3</sub>)  $\delta$  203.8, 171.2, 145.6, 138.2, 137.3, 128.2, 126.6, 125.8, 114.5, 112.3, 101.1, 97.5, 60.6, 40.7, 37.9, 34.4, 31.7, 17.0, 14.1; HRMS (ESI): calc. for C<sub>21</sub>H<sub>26</sub>NaO<sub>2</sub> [M+Na]<sup>+</sup>: 333.1825; found: 333.1831.

*Ethyl 5-methylene-3-(2-methylprop-1-en-1-ylidene)dec-9-enoate (1k)*

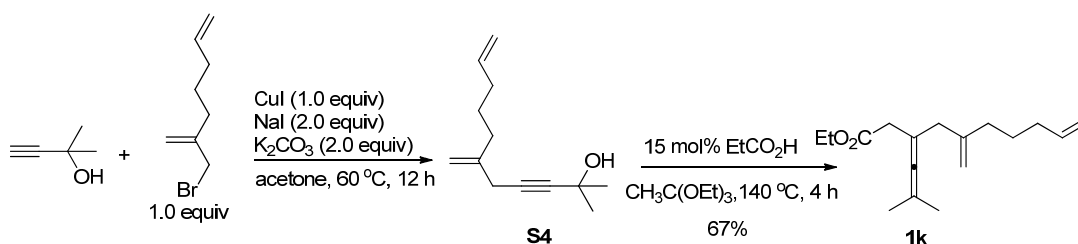

67% isolated yield, colorless oil.  $^1\text{H}$  NMR (400 MHz,  $\text{CDCl}_3$ )  $\delta$  5.87-5.74 (m, 1H), 5.03-4.91 (m, 2H), 4.82-4.75 (m, 2H), 4.11 (q,  $J = 7.1$  Hz, 2H), 2.87 (s, 2H), 2.73 (s, 2H), 2.08-2.01 (m, 4H), 1.67 (s, 6H), 1.56-1.47 (m, 2H), 1.24 (t,  $J = 7.1$  Hz, 3H);  $^{13}\text{C}$  NMR (100 MHz,  $\text{CDCl}_3$ )  $\delta$  201.2, 171.7, 146.7, 138.7, 114.5, 111.5, 95.6, 93.3, 60.4, 40.9, 38.1, 34.5, 33.5, 26.8, 20.5, 14.2; HRMS (ESI): calc. for  $\text{C}_{17}\text{H}_{26}\text{NaO}_2$   $[\text{M}+\text{Na}]^+$ : 285.1825; found: 285.1830.

*Preparation of 5-Methylene-3-(2-methylprop-1-en-1-ylidene)non-8-en-1-yl acetate (1e)*

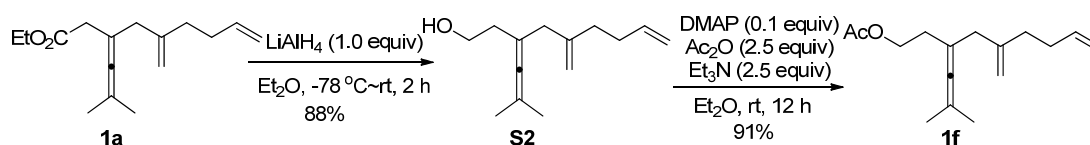

A solution of allene **1a** (496 mg, 2 mmol) in dry  $\text{Et}_2\text{O}$  (5 mL) was added dropwise to a stirred suspension of  $\text{LiAlH}_4$  (76 mg, 2 mmol) in dry  $\text{Et}_2\text{O}$  (10 mL) at  $-78$  °C under Ar atmosphere. The mixture was stirred for 2 h at room temperature, and then carefully quenched with  $\text{H}_2\text{O}$  (2 mL). The organic layer was separated, and the aqueous layer was extracted with  $\text{Et}_2\text{O}$  ( $2 \times 30$  mL). The combined organic layers were dried over  $\text{Na}_2\text{SO}_4$ , filtered, and concentrated in vacuo. The residue was dissolved in  $\text{Et}_2\text{O}$  (20 mL), and quickly filtered via a short column of silica gel (2 cm, eluent: 20 mL of  $\text{Et}_2\text{O}$ ). Evaporation of the solvent afforded the pure product **S2** (363 mg, 88%): colorless oil, which was used as the starting material in the next step without further characterization.

To a three-necked flask were added propargyl alcohol **S2** (206 g, 1 mmol), DMAP (12.2 mg, 0.1 mmol),  $\text{Et}_2\text{O}$  (3 mL),  $\text{Et}_3\text{N}$  (0.35 mL, 2.5 mmol), and  $\text{Ac}_2\text{O}$  (0.24 mL, 2.5 mmol). After full consumption of starting material as monitored by TLC at room temperature (12 h), the reaction was carefully quenched with water (5 mL). The

organic layer was separated, and the aqueous layer was extracted with Et<sub>2</sub>O (2 × 10 mL). The combined organic layers were dried over Na<sub>2</sub>SO<sub>4</sub>, filtered, and concentrated in vacuo. The crude product was purified via column chromatography on silica gel (eluent: petroleum ether/ethyl ether = 30/1) to afford the desired acetate **1f** (228 mg, 91%): colorless oil, <sup>1</sup>H NMR (400 MHz, CDCl<sub>3</sub>) δ 5.87-5.74 (m, 1H), 5.05-4.91 (m, 2H), 4.83-4.75 (m, 2H), 4.10 (t, *J* = 6.8 Hz, 2H), 2.68 (s, 2H), 2.23-2.14 (m, 4H), 2.02 (s, 3H), 1.65 (s, 6H); <sup>13</sup>C NMR (100 MHz, CDCl<sub>3</sub>) δ 199.8, 171.0, 146.5, 138.4, 114.4, 111.3, 95.9, 95.3, 63.0, 41.5, 34.3, 31.8, 30.5, 20.9, 20.6; HRMS (ESI): calc. for C<sub>16</sub>H<sub>24</sub>NaO [M+Na]<sup>+</sup>: 271.1669; found: 271.1677.

### Preparation of allenes **1g~1i**.<sup>[3]</sup>

#### 5-Methylene-7-(2-methylprop-1-en-1-ylidene)undec-1-ene (**1g**)

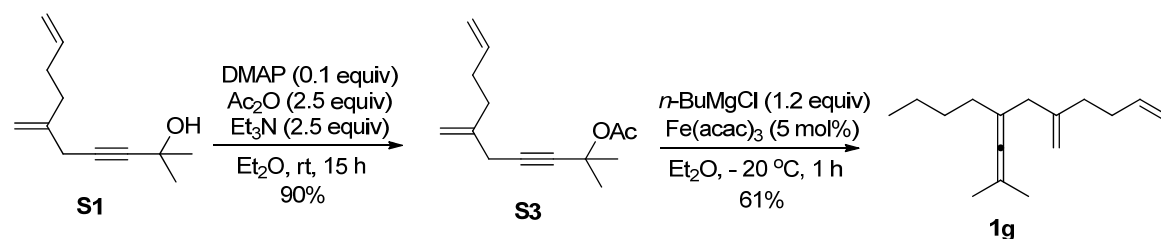

To a three-necked flask were added propargyl alcohol **S1** (712 mg, 4 mmol), DMAP (49 mg, 0.8 mmol), Et<sub>2</sub>O (10 mL), Et<sub>3</sub>N (1.4 mL, 10 mmol), and Ac<sub>2</sub>O (0.95 mL, 10 mmol). After full consumption of starting material as monitored by TLC at room temperature (15 h), the reaction was carefully quenched with water (10 mL). The organic layer was separated, and the aqueous layer was extracted with Et<sub>2</sub>O (2 × 30 mL). The combined organic layers were dried over Na<sub>2</sub>SO<sub>4</sub>, filtered, concentrated in vacuo. The crude product was purified via column chromatography on silica gel (eluent: petroleum ether/ethyl ether = 30/1) to afford the desired acetate **S3** (792 mg, 90%): colorless oil, which was used as the starting material in the next step without further characterization.

A solution of *n*-BuMgCl (0.9 mL, 1.8 mmol, 2.0 M/THF) was added dropwise to a stirred suspension of propargylic alcohol acetate **S3** (309 mg, 1.5 mmol) and Fe(acac)<sub>3</sub> (26.6 mg, 0.075 mmol) in dry Et<sub>2</sub>O (7.5 mL) at -20 °C under Ar atmosphere. The mixture was stirred for 1 h at -20 °C, and then carefully quenched with citric acid

aqueous solution (2 mL, 10%). The organic layer was separated, and the aqueous layer was extracted with Et<sub>2</sub>O (2 × 30 mL). The combined organic layers were dried over Na<sub>2</sub>SO<sub>4</sub>, filtered, concentrated in vacuo, and purified via column chromatography on silica gel (eluent: petroleum ether) to afford the desired product **1g** (199 mg, 61%): colorless oil. <sup>1</sup>H NMR (400 MHz, CDCl<sub>3</sub>) δ 5.89-5.77 (m, 1H), 5.07-4.91 (m, 2H), 4.82-4.75 (m, 2H), 2.66 (s, 2H), 2.26-2.08 (m, 4H), 1.87-1.81 (m, 2H), 1.66 (s, 6H), 1.40-1.27 (m, 4H), 0.89 (t, *J* = 7.1 Hz, 3H); <sup>13</sup>C NMR (100 MHz, CDCl<sub>3</sub>) δ 199.8, 147.2, 138.7, 114.3, 110.8, 99.2, 94.5, 41.4, 34.4, 31.9, 31.4, 29.8, 22.3, 20.8, 14.1; HRMS (ESI): calc. for C<sub>16</sub>H<sub>26</sub>Na [M+Na]<sup>+</sup>: 244.1927; found: 244.1900.

The general method from above was used for the preparation of the following compounds:

(2-Methyl-6-methylenedeca-2,3,9-trien-4-yl)cyclohexane (**1h**)

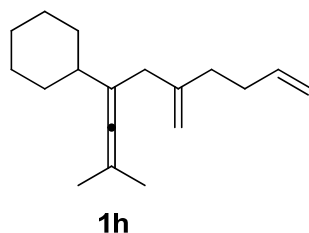

59% isolated yield, colorless oil. <sup>1</sup>H NMR (400 MHz, CDCl<sub>3</sub>) δ 5.90-5.75 (m, 1H), 5.06-4.91 (m, 2H), 4.81-4.73 (m, 2H), 2.69 (s, 2H), 2.24-2.07 (m, 4H), 1.82-1.58 (m, 12H), 1.31-0.97 (m, 5H); <sup>13</sup>C NMR (100 MHz, CDCl<sub>3</sub>) δ 199.5, 147.6, 138.7, 114.3, 110.7, 104.9, 95.4, 40.0, 39.5, 34.5, 32.6, 31.9, 26.5, 26.4, 20.9; HRMS (ESI): calc. for C<sub>18</sub>H<sub>28</sub>Na [M+Na]<sup>+</sup>: 267.2063; found: 267.2138.

(4-Methylene-2-(2-methylprop-1-en-1-ylidene)oct-7-en-1-yl)benzene (**1i**)

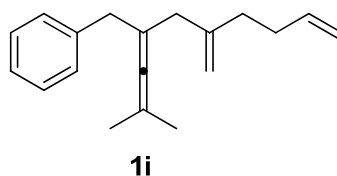

78% isolated yield, colorless oil. <sup>1</sup>H NMR (400 MHz, CDCl<sub>3</sub>) δ 7.31-7.25 (m, 2H), 7.22-7.17 (m, 3H), 5.90-5.76 (m, 1H), 5.07-4.93 (m, 2H), 4.86-4.79 (m, 2H), 3.21 (s, 2H), 2.64 (s, 2H), 2.23-2.10 (m, 4H), 1.64 (s, 6H); <sup>13</sup>C NMR (100 MHz, CDCl<sub>3</sub>) δ



201.2, 146.8, 140.4, 138.6, 129.0, 128.0, 125.8, 114.3, 111.3, 98.8, 94.6, 40.1, 38.9, 34.5, 31.8, 20.6; HRMS (ESI): calc. for  $C_{19}H_{24}Na$   $[M+Na]^+$ : 275.1770; found: 275.1775.

## Optimization of Oxidative Carbocyclization of Dienallenes:

Table S1. Optimization of the reaction conditions<sup>a</sup>

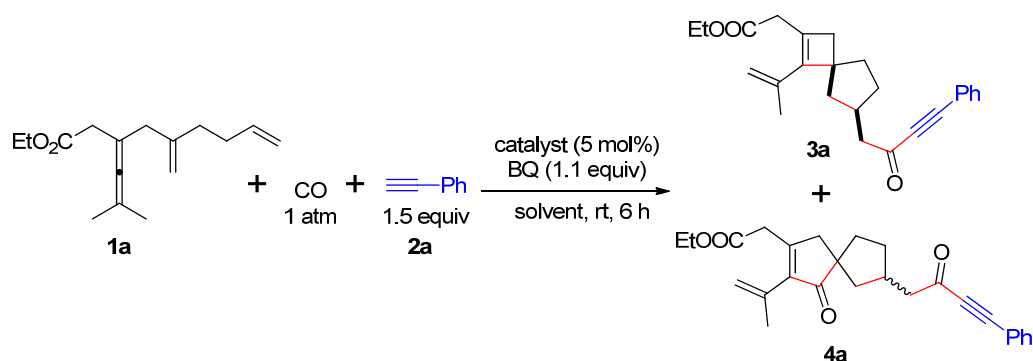

| Entry                     | Catalyst                                                                            | Solvent     | Yield of <b>3a</b><br>(%) <sup>b</sup> | Yield of <b>4a</b><br>(%) <sup>b</sup> | Recovery of <b>1a</b><br>(%) <sup>b</sup> |
|---------------------------|-------------------------------------------------------------------------------------|-------------|----------------------------------------|----------------------------------------|-------------------------------------------|
| 1                         | Pd(OAc) <sub>2</sub>                                                                | DCE         | 3                                      | 41                                     | 33                                        |
| <b>2</b>                  | <b>Pd(TFA)<sub>2</sub></b>                                                          | <b>DCE</b>  | -                                      | <b>90</b>                              | -                                         |
| 3                         | Pd(PPh <sub>3</sub> ) <sub>2</sub> Cl <sub>2</sub>                                  | DCE         | -                                      | -                                      | 90                                        |
| 4                         | 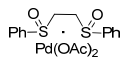 | DCE         | -                                      | 77                                     | -                                         |
| 5                         | Pd(TFA) <sub>2</sub>                                                                | THF         | 4                                      | 69                                     | -                                         |
| 6                         | Pd(TFA) <sub>2</sub>                                                                | acetone     | 7                                      | 64                                     | -                                         |
| 7                         | Pd(TFA) <sub>2</sub>                                                                | toluene     | 3                                      | 81                                     | -                                         |
| 8                         | Pd(TFA) <sub>2</sub>                                                                | dioxane     | 2                                      | 85                                     | -                                         |
| 9                         | Pd(TFA) <sub>2</sub>                                                                | MeCN        | 12                                     | 20                                     | 45                                        |
| 10 <sup>c</sup>           | Pd(TFA) <sub>2</sub>                                                                | MeCN        | 18                                     | 35                                     | 20                                        |
| 11 <sup>d</sup>           | Pd(TFA) <sub>2</sub>                                                                | MeCN        | 35                                     | 38                                     | -                                         |
| 12 <sup>e</sup>           | Pd(TFA) <sub>2</sub>                                                                | MeCN        | 56                                     | 16                                     | -                                         |
| 13 <sup>e,f</sup>         | Pd(TFA) <sub>2</sub>                                                                | MeCN        | 65                                     | 9                                      | -                                         |
| 14 <sup>e,f,g</sup>       | Pd(TFA) <sub>2</sub>                                                                | MeCN        | 47                                     | 8                                      | 10                                        |
| <b>15<sup>e,f,h</sup></b> | <b>Pd(TFA)<sub>2</sub></b>                                                          | <b>MeCN</b> | <b>75</b>                              | <b>3</b>                               | -                                         |

<sup>a</sup>The reaction was conducted in the indicated solvent (1 mL) at room temperature using **1a** (0.1 mmol), **2a** (1.5 equiv), BQ (1.1 equiv) in the presence of the palladium catalyst (5 mol%). <sup>b</sup>Determined by <sup>1</sup>HNMR using anisole as the internal standard. <sup>c</sup>The reaction was conducted at 40 °C. <sup>d</sup>The reaction was conducted at 60 °C. <sup>e</sup>The reaction was conducted at 80 °C. <sup>f</sup>3 mL MeCN was used. <sup>g</sup>2,6-Dimethyl-BQ was used instead of BQ. <sup>h</sup>F<sub>4</sub>-BQ was used instead of BQ.

## General procedure for palladium-catalyzed oxidative carbocyclization of enallenes for the formation of **3**

### Representative procedure A for the synthesis of **3a-3i**.

Ethyl 2-(6-(2-oxo-4-phenylbut-3-yn-1-yl)-1-(prop-1-en-2-yl)spiro[3.4]oct-1-en-2-yl)acetate (**3a**)

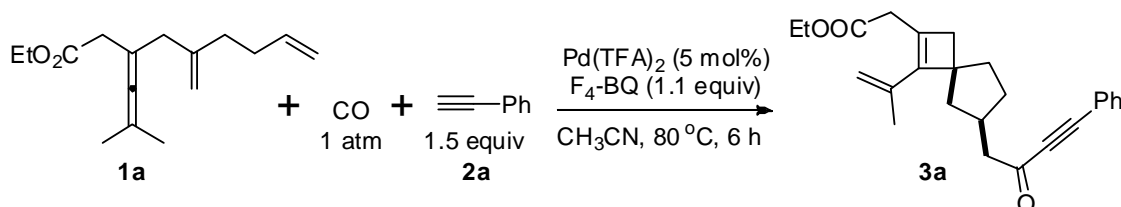

To a solution of Pd(TFA)<sub>2</sub> (3.3 mg, 0.01 mmol), F<sub>4</sub>-BQ (39.6 mg, 0.22 mmol) and **2a** (30.6 mg, 0.3 mmol) in MeCN (6 mL) were added enallene **1a** (49.6 mg, 0.2 mmol). The tube was closed with a septum. The tube was evacuated and filled with carbon monoxide gas (repeated three times) using a balloon. The reaction was stirred at 80 °C for 6 h. After full consumption of starting material **1a** as monitored by TLC, the reaction mixture was evaporated and purified via column chromatography on silica gel (eluent: petroleum ether/ethyl ether = 15/1) afforded **3a** (56.4 mg, 75%): colorless oil. <sup>1</sup>H NMR (400 MHz, CDCl<sub>3</sub>) δ 7.60-7.54 (m, 2H, ArH), 7.48-7.42 (m, 1H, ArH), 7.41-7.35 (m, 2H, ArH), 4.91-4.84 (m, 1H, one proton of =CH<sub>2</sub>), 4.67-4.62 (m, 1H, one proton of =CH<sub>2</sub>), 4.08 (q, *J* = 7.1 Hz, 2H, OCH<sub>2</sub>), 3.08 (d, *J* = 15.7 Hz, 1H, one proton of CH<sub>2</sub>), 2.94 (d, *J* = 15.7 Hz, 1H, one proton of CH<sub>2</sub>), 2.86 (d, *J* = 14.2 Hz, 1H, one proton of CH<sub>2</sub>), 2.82 (d, *J* = 14.2 Hz, 1H, one proton of CH<sub>2</sub>), 2.47 (t, *J* = 4.0 Hz, 1H, one proton of CH<sub>2</sub>), 2.37 (d, *J* = 16.8 Hz, 1H, one proton of CH<sub>2</sub>), 2.11 (d, *J* = 16.8 Hz, 1H, one proton of CH<sub>2</sub>), 1.89-1.71 (m, 8H, CH<sub>3</sub> + CH<sub>2</sub> + one proton of CH<sub>2</sub>), 1.64 (ddd, *J* = 10.7, 4.1, 1.0 Hz, 1H, CH), 1.22 (t, *J* = 7.1 Hz, 3H, CH<sub>3</sub>); <sup>13</sup>C NMR (100 MHz, CDCl<sub>3</sub>) δ 187.1, 172.2, 145.4, 144.9, 133.0, 130.7, 128.6, 120.9, 120.1, 90.5, 89.3, 60.3, 56.2, 45.7, 42.0, 41.5, 39.5, 38.4, 35.8, 34.7, 22.1, 14.2; HRMS (ESI): calc. for C<sub>25</sub>H<sub>28</sub>NaO<sub>3</sub> [M+Na]<sup>+</sup>: 399.1931; found: 399.1926.

The general method from above was used for the preparation of the following compounds **3**:

*Ethyl 2-(6-(4-(2-methoxyphenyl)-2-oxobut-3-yn-1-yl)-1-(prop-1-en-2-yl)spiro[3.4]oct-1-en-2-yl)acetate (3ab)*

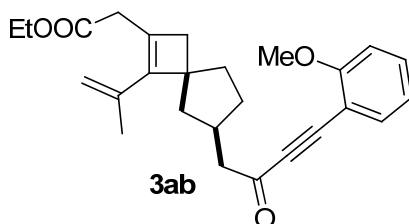

72% isolated yield, colorless oil.  $^1\text{H}$  NMR (400 MHz,  $\text{CDCl}_3$ )  $\delta$  7.50 (dd,  $J = 7.6$ , 1.6 Hz, 1H), 7.41 (ddd,  $J = 9.2$ , 7.5, 1.8 Hz, 1H), 6.94 (td,  $J = 7.6$ , 1.0 Hz, 1H), 6.90 (d,  $J = 8.4$  Hz, 1H), 4.91-4.83 (m, 1H), 4.68-4.61 (m, 1H), 4.08 (q,  $J = 7.1$  Hz, 2H), 3.89 (s, 3H), 3.07 (d,  $J = 15.7$  Hz, 1H), 2.93 (d,  $J = 15.7$  Hz, 1H), 2.86 (d,  $J = 14.2$  Hz, 1H), 2.82 (d,  $J = 14.2$  Hz, 1H), 2.48-2.43 (m, 1H), 2.38 (d,  $J = 16.9$  Hz, 1H), 2.10 (d,  $J = 16.9$  Hz, 1H), 1.89-1.73 (m, 8H), 1.65 (ddd,  $J = 10.7$ , 4.1, 1.2 Hz, 1H), 1.22 (t,  $J = 7.1$  Hz, 3H);  $^{13}\text{C}$  NMR (100 MHz,  $\text{CDCl}_3$ )  $\delta$  187.1, 172.2, 161.6, 145.4, 145.0, 134.9, 132.4, 120.9, 120.5, 113.1, 110.8, 109.3, 93.4, 87.9, 60.3, 56.2, 55.8, 45.7, 41.9, 41.4, 39.6, 38.4, 35.8, 34.8, 22.1, 14.2; HRMS (ESI): calc. for  $\text{C}_{26}\text{H}_{30}\text{NaO}_4$   $[\text{M}+\text{Na}]^+$ : 429.2036; found: 429.2030.

*Ethyl 2-(6-(4-(3-methoxyphenyl)-2-oxobut-3-yn-1-yl)-1-(prop-1-en-2-yl)spiro[3.4]oct-1-en-2-yl)acetate (3ac)*

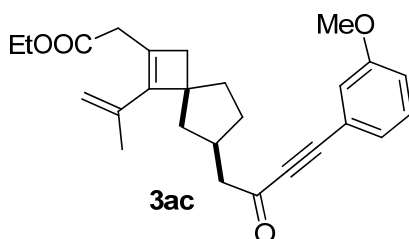

74% isolated yield, colorless oil.  $^1\text{H}$  NMR (400 MHz,  $\text{CDCl}_3$ )  $\delta$  7.29 (t,  $J = 8.0$  Hz, 1H), 7.41 (td,  $J = 7.6$ , 1.3 Hz, 1H), 7.08 (dd,  $J = 2.5$ , 1.4 Hz, 1H), 7.00 (ddd,  $J = 8.3$ , 2.7, 1.0 Hz, 1H), 4.90-4.84 (m, 1H), 4.68-4.61 (m, 1H), 4.08 (q,  $J = 7.1$  Hz, 2H), 3.82 (s, 3H), 3.08 (d,  $J = 15.7$  Hz, 1H), 2.94 (d,  $J = 15.7$  Hz, 1H), 2.86 (d,  $J = 14.3$  Hz, 1H), 2.82 (d,  $J = 14.3$  Hz, 1H), 2.47 (t,  $J = 4.1$  Hz, 1H), 2.37 (d,  $J = 16.9$  Hz, 1H), 2.11 (d,  $J = 16.9$  Hz, 1H), 1.89-1.73 (m, 8H), 1.63 (ddd,  $J = 10.7$ , 4.1, 1.1 Hz, 1H), 1.22 (t,  $J = 7.1$  Hz, 3H);  $^{13}\text{C}$  NMR (100 MHz,  $\text{CDCl}_3$ )  $\delta$  187.1, 172.2, 159.4, 145.5, 144.9, 129.7, 125.5, 121.0, 120.9, 117.5, 117.4, 113.0, 90.4, 88.9, 60.3, 56.1, 55.4, 45.7, 42.0, 41.5,

39.5, 38.4, 35.8, 34.7, 22.1, 14.2; HRMS (ESI): calc. for C<sub>26</sub>H<sub>30</sub>NaO<sub>4</sub> [M+Na]<sup>+</sup>: 429.2036; found: 429.2033.

*Ethyl e2-(6-(2-oxo-4-(p-tolyl)but-3-yn-1-yl)-1-(prop-1-en-2-yl)spiro[3.4]oct-1-en-2-yl)acetate (3ad)*

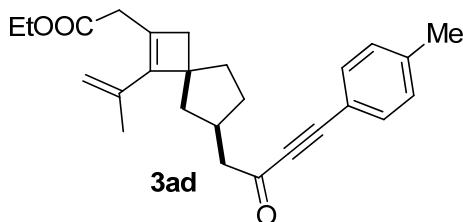

79% isolated yield, colorless oil. <sup>1</sup>H NMR (400 MHz, CDCl<sub>3</sub>) δ 7.49-7.44 (m, 2H), 7.21-7.16 (m, 2H), 4.89-4.84 (m, 1H), 4.66-4.62 (m, 1H), 4.08 (q, *J* = 7.1 Hz, 2H), 3.07 (d, *J* = 15.7 Hz, 1H), 2.93 (d, *J* = 15.7 Hz, 1H), 2.84 (d, *J* = 14.2 Hz, 1H), 2.82 (d, *J* = 14.2 Hz, 1H), 2.48-2.43 (m, 1H), 2.40-2.33 (m, 4H), 2.10 (d, *J* = 16.8 Hz, 1H), 1.89-1.71 (m, 8H), 1.63 (ddd, *J* = 10.6, 4.1, 1.0 Hz, 1H), 1.22 (t, *J* = 7.1 Hz, 3H); <sup>13</sup>C NMR (100 MHz, CDCl<sub>3</sub>) δ 187.1, 172.2, 145.4, 144.9, 141.4, 133.0, 129.4, 120.9, 117.0, 113.2, 91.2, 89.2, 60.3, 56.2, 45.7, 42.0, 41.5, 39.5, 38.4, 35.8, 34.7, 22.1, 21.7, 14.2; HRMS (ESI): calc. for C<sub>26</sub>H<sub>30</sub>NaO<sub>3</sub> [M+Na]<sup>+</sup>: 413.2087; found: 413.2096.

*Ethyl 2-(6-(4-(4-fluorophenyl)-2-oxobut-3-yn-1-yl)-1-(prop-1-en-2-yl)spiro[3.4]oct-1-en-2-yl)acetate (3ae)*

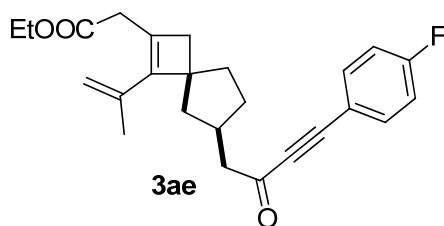

64% isolated yield, colorless oil. <sup>1</sup>H NMR (400 MHz, CDCl<sub>3</sub>) δ 7.61-7.53 (m, 2H), 7.12-7.03 (m, 2H), 4.90-4.84 (m, 1H), 4.66-4.62 (m, 1H), 4.08 (q, *J* = 7.1 Hz, 2H), 3.07 (d, *J* = 15.7 Hz, 1H), 2.93 (d, *J* = 15.8 Hz, 1H), 2.85 (d, *J* = 14.3 Hz, 1H), 2.80 (d, *J* = 14.3 Hz, 1H), 2.46 (t, *J* = 4.1 Hz, 1H), 2.36 (d, *J* = 16.9 Hz, 1H), 2.10 (d, *J* = 16.9 Hz, 1H), 1.90-1.69 (m, 8H), 1.62 (ddd, *J* = 10.6, 4.1, 1.1 Hz, 1H), 1.22 (t, *J* = 7.2 Hz, 3H); <sup>13</sup>C NMR (100 MHz, CDCl<sub>3</sub>) δ 186.9, 172.2, 164 (d, *J* = 254 Hz), 145.4, 144.9, 135 (d, *J* = 254 Hz), 120.8, 116.18 (d, *J* = 3.5 Hz), 116.15 (d, *J* = 22.2 Hz), 113.2, 89 (d, *J* = 24.5 Hz), 60.3, 56.1, 45.7, 42.0, 41.5, 39.5, 38.4, 35.8, 34.7, 22.0, 14.2; <sup>19</sup>F

NMR (376 MHz, CDCl<sub>3</sub>)  $\delta$  -106.3; HRMS (ESI): calc. for C<sub>25</sub>H<sub>27</sub>FNaO<sub>3</sub> [M+Na]<sup>+</sup>: 417.1836; found: 417.1831.

*Ethyl 2-(6-(4-(4-bromophenyl)-2-oxobut-3-yn-1-yl)-1-(prop-1-en-2-yl)spiro[3.4]oct-1-en-2-yl)acetate (3af)*

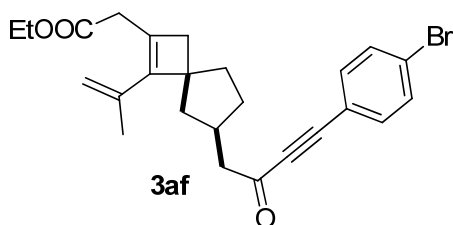

66% isolated yield, colorless oil. <sup>1</sup>H NMR (400 MHz, CDCl<sub>3</sub>)  $\delta$  7.55-7.50 (m, 2H), 7.44-7.40 (m, 2H), 4.89-4.85 (m, 1H), 4.66-4.62 (m, 1H), 4.08 (q, *J* = 7.1 Hz, 2H), 3.07 (d, *J* = 15.7 Hz, 1H), 2.93 (d, *J* = 15.7 Hz, 1H), 2.85 (d, *J* = 14.4 Hz, 1H), 2.80 (d, *J* = 14.4 Hz, 1H), 2.46 (t, *J* = 4.2 Hz, 1H), 2.36 (d, *J* = 16.9 Hz, 1H), 2.10 (d, *J* = 16.9 Hz, 1H), 1.88-1.71 (m, 8H), 1.62 (ddd, *J* = 10.7, 4.0, 1.1 Hz, 1H), 1.22 (t, *J* = 7.2 Hz, 3H); <sup>13</sup>C NMR (100 MHz, CDCl<sub>3</sub>)  $\delta$  186.9, 172.2, 145.5, 144.9, 134.2, 132.0, 125.5, 120.8, 119.0, 113.2, 90.0, 89.0, 60.3, 56.1, 45.6, 41.9, 41.5, 39.5, 38.4, 35.8, 34.7, 22.0, 14.2; HRMS (ESI): calc. for C<sub>25</sub>H<sub>27</sub>Br<sup>81</sup>NaO<sub>3</sub> [M+Na]<sup>+</sup>: 479.1017; found: 479.1007.

*Ethyl 2-(6-(2-oxo-4-(4-(trifluoromethyl)phenyl)but-3-yn-1-yl)-1-(prop-1-en-2-yl)spiro[3.4]oct-1-en-2-yl)acetate (3ag)*

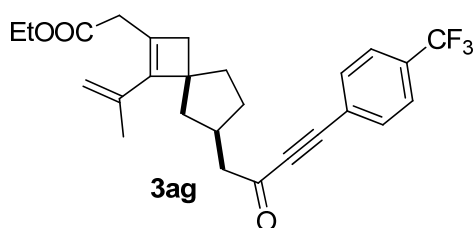

77% isolated yield, colorless oil. <sup>1</sup>H NMR (400 MHz, CDCl<sub>3</sub>)  $\delta$  7.70-7.62 (m, 4H), 4.90-4.85 (m, 1H), 4.67-4.62 (m, 1H), 4.12-4.05 (m, 2H), 3.08 (d, *J* = 15.7 Hz, 1H), 2.94 (d, *J* = 15.6 Hz, 1H), 2.88 (d, *J* = 14.5 Hz, 1H), 2.83 (d, *J* = 14.5 Hz, 1H), 2.47 (t, *J* = 4.3 Hz, 1H), 2.37 (d, *J* = 16.8 Hz, 1H), 2.11 (d, *J* = 16.7 Hz, 1H), 1.89-1.72 (m, 8H), 1.63 (ddd, *J* = 10.5, 4.0, 1.1 Hz, 1H), 1.22 (t, *J* = 7.1 Hz, 3H); <sup>13</sup>C NMR (100 MHz, CDCl<sub>3</sub>)  $\delta$  186.7, 172.2, 145.5, 144.8, 133.0, 132.2 (q, *J* = 33.1 Hz), 125.5 (q, *J* = 3.7 Hz), 122.9, 123.5 (q, *J* = 273 Hz), 120.8, 113.3, 90.3, 87.9, 60.3, 56.2, 45.6,

41.9, 41.5, 39.5, 38.4, 35.8, 34.7, 22.0, 14.2;  $^{19}\text{F}$  NMR (376 MHz,  $\text{CDCl}_3$ )  $\delta$  -63.2; HRMS (ESI): calc. for  $\text{C}_{26}\text{H}_{27}\text{F}_3\text{NaO}_3$   $[\text{M}+\text{Na}]^+$ : 467.1805; found: 467.1800.

*Ethyl 2-(6-(2-oxo-4-(thiophen-2-yl)but-3-yn-1-yl)-1-(prop-1-en-2-yl)spiro[3.4]oct-1-en-2-yl)acetate (3ah)*

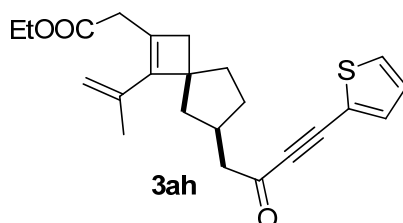

83% isolated yield, colorless oil.  $^1\text{H}$  NMR (400 MHz,  $\text{CDCl}_3$ )  $\delta$  7.48 (ddd,  $J = 7.1$ , 5.1, 1.2 Hz, 2H), 7.07 (dd,  $J = 5.1$ , 3.7 Hz, 1H), 4.89-4.84 (m, 1H), 4.67-4.62 (m, 1H), 4.08 (q,  $J = 7.1$  Hz, 2H), 3.07 (d,  $J = 15.6$  Hz, 1H), 2.93 (d,  $J = 15.7$  Hz, 1H), 2.84 (d,  $J = 14.3$  Hz, 1H), 2.79 (d,  $J = 14.3$  Hz, 1H), 2.46 (t,  $J = 4.0$  Hz, 1H), 2.36 (d,  $J = 16.9$  Hz, 1H), 2.09 (d,  $J = 16.9$  Hz, 1H), 1.89-1.70 (m, 8H), 1.63 (ddd,  $J = 10.7$ , 4.0, 1.2 Hz, 1H), 1.22 (t,  $J = 7.1$  Hz, 3H);  $^{13}\text{C}$  NMR (100 MHz,  $\text{CDCl}_3$ )  $\delta$  186.6, 172.2, 145.4, 144.9, 136.5, 131.6, 127.7, 120.8, 119.9, 113.2, 93.8, 84.5, 60.3, 55.9, 45.7, 42.0, 41.5, 39.5, 38.4, 35.8, 34.7, 22.0, 14.2;  $^{19}\text{F}$  NMR (376 MHz,  $\text{CDCl}_3$ )  $\delta$  -106.3; HRMS (ESI): calc. for  $\text{C}_{23}\text{H}_{26}\text{NaO}_3\text{S}$   $[\text{M}+\text{Na}]^+$ : 405.1495; found: 405.1481.

*Ethyl 2-(6-(2-oxo-4-(thiophen-3-yl)but-3-yn-1-yl)-1-(prop-1-en-2-yl)spiro[3.4]oct-1-en-2-yl)acetate (3ai)*

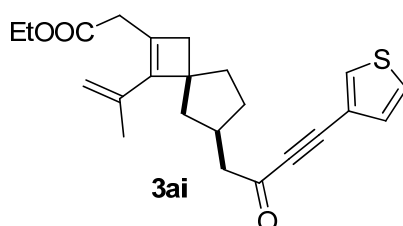

71% isolated yield, colorless oil.  $^1\text{H}$  NMR (400 MHz,  $\text{CDCl}_3$ )  $\delta$  7.75 (dd,  $J = 3.0$ , 1.2 Hz, 1H), 7.34 (dd,  $J = 5.0$ , 3.0 Hz, 1H), 7.34 (dd,  $J = 5.1$ , 1.2 Hz, 1H), 4.89-4.85 (m, 1H), 4.66-4.62 (m, 1H), 4.08 (q,  $J = 7.2$  Hz, 2H), 3.07 (d,  $J = 15.6$  Hz, 1H), 2.93 (d,  $J = 15.6$  Hz, 1H), 2.84 (d,  $J = 14.3$  Hz, 1H), 2.79 (d,  $J = 14.3$  Hz, 1H), 2.46 (t,  $J = 4.1$  Hz, 1H), 2.36 (d,  $J = 16.8$  Hz, 1H), 2.10 (d,  $J = 16.9$  Hz, 1H), 1.88-1.71 (m, 8H), 1.62 (ddd,  $J = 10.7$ , 4.1, 1.1 Hz, 1H), 1.22 (t,  $J = 7.1$  Hz, 3H);  $^{13}\text{C}$  NMR (100 MHz,  $\text{CDCl}_3$ )  $\delta$  187.1, 172.2, 145.4, 144.9, 133.7, 130.2, 126.2, 120.9, 119.4, 89.5, 85.9,

60.3, 56.1, 45.7, 42.0, 39.5, 38.5, 35.8, 34.7, 22.1, 14.2; HRMS (ESI): calc. for  $C_{23}H_{26}NaO_3S$   $[M+Na]^+$ : 405.1495; found: 405.1493.

*Ethyl 2-(6-(4-cyclohexyl-2-oxobut-3-yn-1-yl)-1-(prop-1-en-2-yl)spiro[3.4]oct-1-en-2-yl)acetate (3aj)*

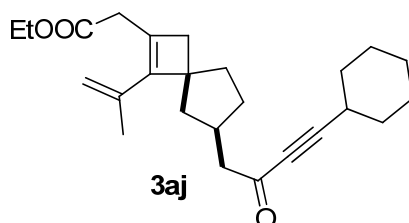

66% isolated yield, colorless oil.  $^1H$  NMR (400 MHz,  $CDCl_3$ )  $\delta$  4.88-4.85 (m, 1H), 4.65-4.62 (m, 1H), 4.09 (q,  $J = 7.1$  Hz, 2H), 3.07 (d,  $J = 15.8$  Hz, 1H), 2.92 (d,  $J = 15.7$  Hz, 1H), 2.72 (d,  $J = 14.2$  Hz, 1H), 2.68 (d,  $J = 14.2$  Hz, 1H), 2.58-2.50 (m, 1H), 2.44 (t,  $J = 4.4$  Hz, 1H), 2.31 (d,  $J = 16.9$  Hz, 1H), 2.04 (d,  $J = 16.9$  Hz, 1H), 1.88-1.65 (m, 12H), 1.60-1.45 (m, 4H), 1.40-1.29 (m, 3H), 1.24 (t,  $J = 7.1$  Hz, 3H);  $^{13}C$  NMR (100 MHz,  $CDCl_3$ )  $\delta$  187.5, 172.2, 145.4, 145.0, 120.9, 113.1, 97.8, 82.3, 60.3, 56.2, 45.7, 41.8, 41.5, 39.5, 38.4, 35.7, 34.7, 31.5, 29.1, 25.6, 24.7, 22.1, 14.2; HRMS (ESI): calc. for  $C_{25}H_{34}NaO_3$   $[M+Na]^+$ : 405.2400; found: 405.2401.

*(E)-Ethyl 2-(6-(2-oxo-6-phenylhex-5-en-3-yn-1-yl)-1-(prop-1-en-2-yl)spiro[3.4]oct-1-en-2-yl)acetate (3ak)*

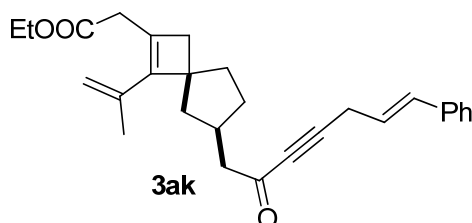

70% isolated yield, colorless oil.  $^1H$  NMR (400 MHz,  $CDCl_3$ )  $\delta$  7.39-7.29 (m, 4H), 7.27-7.21 (m, 1H), 6.67-6.59 (m, 1H), 6.13 (dt,  $J = 15.8, 5.9$  Hz, 1H), 4.89-4.85 (m, 1H), 4.65-4.62 (m, 1H), 4.09 (q,  $J = 7.1$  Hz, 2H), 3.31 (dd,  $J = 5.8, 1.8$  Hz, 1H), 3.07 (d,  $J = 15.6$  Hz, 1H), 2.92 (d,  $J = 15.8$  Hz, 1H), 2.77 (d,  $J = 14.5$  Hz, 1H), 2.73 (d,  $J = 14.2$  Hz, 1H), 2.45 (t,  $J = 4.3$  Hz, 1H), 2.32 (d,  $J = 16.9$  Hz, 1H), 2.07 (d,  $J = 16.9$  Hz, 1H), 1.87-1.69 (m, 8H), 1.59 (ddd,  $J = 10.5, 4.1, 1.1$  Hz, 1H), 1.23 (t,  $J = 7.2$  Hz, 3H);  $^{13}C$  NMR (100 MHz,  $CDCl_3$ )  $\delta$  187.1, 172.2, 145.4, 144.9, 136.5, 132.7, 128.6, 127.7, 126.3, 121.6, 120.9, 113.2, 90.1, 83.9, 60.3, 56.0, 45.6, 41.8, 41.4, 39.5, 38.4, 35.8,



34.7, 22.5, 22.1, 14.2; HRMS (ESI): calc. for C<sub>28</sub>H<sub>32</sub>NaO<sub>3</sub> [M+Na]<sup>+</sup>: 439.2244; found: 439.2238.

*Ethyl 2-(6-(2-oxo-4-(trimethylsilyl)but-3-yn-1-yl)-1-(prop-1-en-2-yl)spiro[3.4]oct-1-en-2-yl)acetate (3a)*

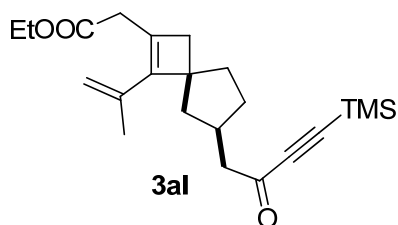

79% isolated yield, colorless oil. <sup>1</sup>H NMR (400 MHz, CDCl<sub>3</sub>) δ 4.89-4.84 (m, 1H), 4.66-4.61 (m, 1H), 4.10 (q, *J* = 7.1 Hz, 2H), 3.06 (d, *J* = 15.7 Hz, 1H), 2.93 (d, *J* = 15.7 Hz, 1H), 2.76 (d, *J* = 14.5 Hz, 1H), 2.71 (d, *J* = 14.5 Hz, 1H), 2.44 (t, *J* = 4.5 Hz, 1H), 2.30 (d, *J* = 17.0 Hz, 1H), 2.05 (d, *J* = 17.0 Hz, 1H), 1.88-1.66 (m, 8H), 1.60-1.54 (m, 1H), 1.24 (t, *J* = 7.2 Hz, 3H), 0.24 (s, 9H); <sup>13</sup>C NMR (100 MHz, CDCl<sub>3</sub>) δ 186.9, 172.2, 145.4, 144.9, 120.8, 113.2, 103.5, 97.5, 60.3, 55.9, 45.6, 41.8, 41.4, 39.5, 38.4, 35.7, 34.7, 22.1, 14.2, -0.8; HRMS (ESI): calc. for C<sub>22</sub>H<sub>32</sub>NaO<sub>3</sub>Si [M+Na]<sup>+</sup>: 395.2013; found: 395.2012.

*Ethyl 2-(1-(cyclopent-1-en-1-yl)-6-(2-oxo-4-phenylbut-3-yn-1-yl)spiro[3.4]oct-1-en-2-yl)acetate (3b)*

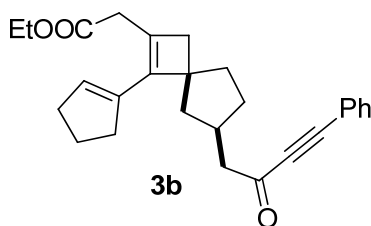

71% isolated yield, colorless oil. <sup>1</sup>H NMR (400 MHz, CDCl<sub>3</sub>) δ 7.59-7.54 (m, 2H), 7.48-7.42 (m, 1H), 7.41-7.35 (m, 2H), 5.50-5.42 (m, 1H), 4.09 (q, *J* = 7.1 Hz, 2H), 3.08 (d, *J* = 15.6 Hz, 1H), 2.97 (d, *J* = 15.6 Hz, 1H), 2.86 (d, *J* = 14.3 Hz, 1H), 2.81 (d, *J* = 14.3 Hz, 1H), 2.53-2.26 (m, 6H), 2.12 (d, *J* = 17.0 Hz, 1H), 1.92-1.73 (m, 7H), 1.63 (ddd, *J* = 10.6, 4.0, 1.0 Hz, 1H), 1.23 (t, *J* = 7.1 Hz, 3H); <sup>13</sup>C NMR (100 MHz, CDCl<sub>3</sub>) δ 187.2, 172.3, 142.8, 140.6, 132.9, 130.7, 128.6, 127.7, 121.9, 120.1, 90.5, 89.3, 60.3, 56.2, 46.3, 41.9, 41.4, 39.6, 35.9, 34.9, 34.8, 32.7, 23.5, 14.2; HRMS (ESI): calc. for C<sub>27</sub>H<sub>30</sub>NaO<sub>3</sub> [M+Na]<sup>+</sup>: 425.2087; found: 425.2078.

*Ethyl 2-(1-(cyclohex-1-en-1-yl)-6-(2-oxo-4-phenylbut-3-yn-1-yl)spiro[3.4]oct-1-en-2-yl)acetate (3c)*

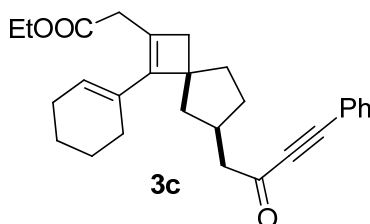

68% isolated yield, colorless oil.  $^1\text{H}$  NMR (400 MHz,  $\text{CDCl}_3$ )  $\delta$  7.59-7.54 (m, 2H), 7.48-7.42 (m, 1H), 7.41-7.35 (m, 2H), 5.38-5.32 (m, 1H), 4.11-4.05 (m, 2H), 3.04 (d,  $J = 15.7$  Hz, 1H), 2.91 (d,  $J = 15.7$  Hz, 1H), 2.85 (d,  $J = 14.2$  Hz, 1H), 2.80 (d,  $J = 14.2$  Hz, 1H), 2.46-2.40 (m, 1H), 2.36 (d,  $J = 16.9$  Hz, 1H), 2.13-1.97 (m, 4H), 1.96-1.69 (m, 6H), 1.67-1.53 (m, 5H), 1.22 (t,  $J = 7.1$  Hz, 3H);  $^{13}\text{C}$  NMR (100 MHz,  $\text{CDCl}_3$ )  $\delta$  187.2, 172.2, 146.1, 138.0, 133.0, 130.6, 128.6, 124.0, 120.5, 120.1, 90.5, 89.3, 60.2, 56.3, 45.7, 42.0, 41.6, 39.7, 38.5, 35.9, 34.8, 27.7, 25.1, 22.9, 22.2, 14.2; HRMS (ESI): calc. for  $\text{C}_{28}\text{H}_{32}\text{NaO}_3$   $[\text{M}+\text{Na}]^+$ : 439.2244; found: 439.2248.

*(E)-Ethyl 2-(1-(cyclooct-1-en-1-yl)-6-(2-oxo-4-phenylbut-3-yn-1-yl)spiro[3.4]oct-1-en-2-yl)acetate (3d)*

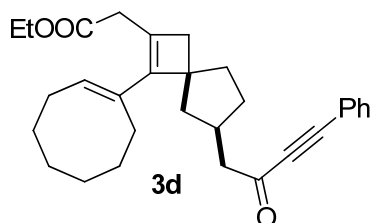

80% isolated yield, colorless oil.  $^1\text{H}$  NMR (400 MHz,  $\text{CDCl}_3$ )  $\delta$  7.59-7.55 (m, 2H), 7.48-7.43 (m, 1H), 7.41-7.35 (m, 2H), 5.34 (t,  $J = 8.0$  Hz, 1H), 4.12-4.05 (m, 2H), 3.15 (d,  $J = 15.8$  Hz, 1H), 2.96 (d,  $J = 15.8$  Hz, 1H), 2.85 (d,  $J = 14.2$  Hz, 1H), 2.81 (d,  $J = 14.2$  Hz, 1H), 2.49-2.43 (m, 1H), 2.38 (d,  $J = 16.8$  Hz, 1H), 2.27-2.06 (m, 5H), 1.89-1.69 (m, 5H), 1.63 (ddd,  $J = 10.6, 4.1, 1.2$  Hz, 1H), 1.59-1.45 (m, 8H), 1.22 (t,  $J = 7.1$  Hz, 3H);  $^{13}\text{C}$  NMR (100 MHz,  $\text{CDCl}_3$ )  $\delta$  187.2, 172.5, 146.5, 140.6, 133.0, 130.6, 128.6, 127.7, 120.6, 120.1, 90.5, 89.3, 60.2, 56.2, 45.8, 42.0, 41.5, 39.8, 38.7, 35.9, 34.6, 29.6, 29.0, 28.4, 26.6, 26.5, 26.4, 14.2; HRMS (ESI): calc. for  $\text{C}_{30}\text{H}_{36}\text{NaO}_3$   $[\text{M}+\text{Na}]^+$ : 467.2557; found: 467.2544.

*Ethyl 2-(6-(2-oxo-4-phenylbut-3-yn-1-yl)-1-(1-phenylvinyl)spiro[3.4]oct-1-en-2-yl)*

acetate (**3e**)

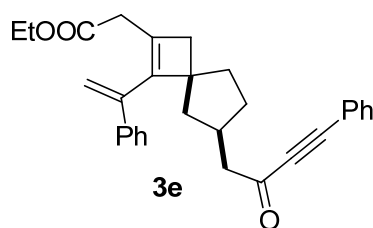

62% isolated yield, colorless oil.  $^1\text{H}$  NMR (400 MHz,  $\text{CDCl}_3$ )  $\delta$  7.60-7.51 (m, 2H), 7.49-7.43 (m, 1H), 7.42-7.36 (m, 4H), 7.35-7.26 (m, 3H), 5.53 (d,  $J = 1.8$  Hz, 1H), 5.04 (d,  $J = 1.8$  Hz, 1H), 4.08 (q,  $J = 7.1$  Hz, 2H), 3.13 (d,  $J = 15.9$  Hz, 1H), 2.99 (d,  $J = 15.9$  Hz, 1H), 2.89 (d,  $J = 14.4$  Hz, 1H), 2.87 (d,  $J = 14.4$  Hz, 1H), 2.51 (d,  $J = 17.1$  Hz, 1H), 2.31 (d,  $J = 4.5$  Hz, 1H), 2.25 (d,  $J = 17.1$  Hz, 1H), 1.94-1.71 (m, 5H), 1.62 (ddd,  $J = 10.6, 3.9, 1.1$  Hz, 1H), 1.22 (t,  $J = 7.1$  Hz, 3H);  $^{13}\text{C}$  NMR (100 MHz,  $\text{CDCl}_3$ )  $\delta$  187.1, 172.1, 147.6, 143.6, 139.1, 132.9, 130.7, 128.6, 128.4, 127.7, 126.7, 124.6, 120.1, 113.7, 90.6, 89.3, 60.4, 56.2, 45.7, 42.0, 41.6, 40.4, 38.5, 36.0, 34.3, 14.2; HRMS (ESI): calc. for  $\text{C}_{30}\text{H}_{30}\text{NaO}_3$   $[\text{M}+\text{Na}]^+$ : 461.2087; found: 461.2065.

2-(6-(2-Oxo-4-phenylbut-3-yn-1-yl)-1-(prop-1-en-2-yl)spiro[3.4]oct-1-en-2-yl)ethyl acetate (**3f**)

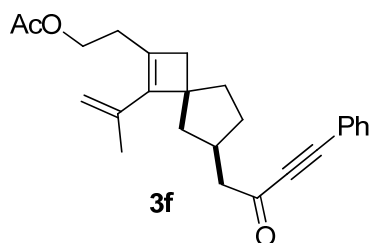

68% isolated yield, colorless oil.  $^1\text{H}$  NMR (400 MHz,  $\text{CDCl}_3$ )  $\delta$  7.60-7.55 (m, 2H), 7.49-7.43 (m, 1H), 7.42-7.36 (m, 2H), 4.88-4.82 (m, 1H), 4.62-4.56 (m, 1H), 4.03 (t,  $J = 7.3$  Hz, 2H), 2.86 (d,  $J = 14.3$  Hz, 1H), 2.82 (d,  $J = 14.3$  Hz, 1H), 2.44-2.22 (m, 4H), 2.07 (d,  $J = 17.0$  Hz, 1H), 2.01 (s, 3H), 1.85-1.74 (m, 6H), 1.74-1.66 (m, 2H), 1.61 (ddd,  $J = 10.7, 4.0, 1.0$  Hz, 1H);  $^{13}\text{C}$  NMR (100 MHz,  $\text{CDCl}_3$ )  $\delta$  187.1, 171.0, 145.4, 144.8, 133.0, 130.7, 128.6, 123.1, 120.1, 112.5, 90.5, 89.3, 63.5, 56.3, 45.2, 41.9, 39.9, 36.0, 34.8, 31.9, 22.5, 21.0; HRMS (ESI): calc. for  $\text{C}_{25}\text{H}_{28}\text{NaO}_3$   $[\text{M}+\text{Na}]^+$ : 399.1931; found: 399.1931.

1-(2-Butyl-1-(prop-1-en-2-yl)spiro[3.4]oct-1-en-6-yl)-4-phenylbut-3-yn-2-one (**3g**)

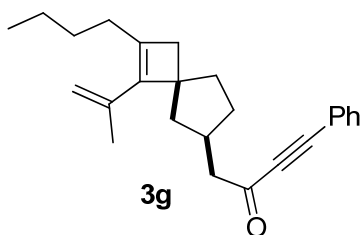

55% isolated yield, colorless oil.  $^1\text{H}$  NMR (400 MHz,  $\text{CDCl}_3$ )  $\delta$  7.61-7.55 (m, 2H), 7.49-7.43 (m, 1H), 7.42-7.35 (m, 2H), 4.86-4.78 (m, 1H), 4.59-4.53 (m, 1H), 2.85 (d,  $J = 14.0$  Hz, 1H), 2.81 (d,  $J = 14.0$  Hz, 1H), 2.42-2.36 (m, 1H), 2.32 (d,  $J = 17.0$  Hz, 1H), 2.03 (d,  $J = 17.2$  Hz, 1H), 2.00-1.89 (m, 2H), 1.86-1.65 (m, 8H), 1.60 (ddd,  $J = 10.5, 4.0, 1.2$  Hz, 1H), 1.32-1.19 (m, 5H), 0.85 (t,  $J = 7.0$  Hz, 3H);  $^{13}\text{C}$  NMR (100 MHz,  $\text{CDCl}_3$ )  $\delta$  187.4, 146.0, 141.4, 132.9, 130.7, 128.6, 127.7, 120.2, 90.5, 89.4, 56.7, 44.9, 42.0, 39.9, 36.0, 34.9, 32.5, 31.1, 22.69, 22.67, 14.1; HRMS (ESI): calc. for  $\text{C}_{25}\text{H}_{30}\text{NaO}$   $[\text{M}+\text{Na}]^+$ : 369.2189; found: 369.2182.

*1-(2-Cyclohexyl-1-(prop-1-en-2-yl)spiro[3.4]oct-1-en-6-yl)-4-phenylbut-3-yn-2-one*  
(**3h**)

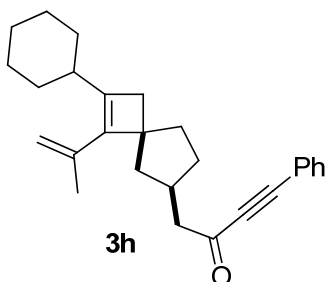

60% isolated yield, colorless oil.  $^1\text{H}$  NMR (400 MHz,  $\text{CDCl}_3$ )  $\delta$  7.61-7.55 (m, 2H), 7.49-7.43 (m, 1H), 7.42-7.35 (m, 2H), 4.83-4.76 (m, 1H), 4.57-4.51 (m, 1H), 2.85 (d,  $J = 13.9$  Hz, 1H), 2.85 (d,  $J = 13.9$  Hz, 1H), 2.40-2.22 (m, 3H), 2.04 (d,  $J = 16.8$  Hz, 1H), 1.86-1.53 (m, 12H), 1.42-1.33 (m, 2H), 1.32-1.14 (m, 4H), 1.12-1.00 (m, 1H);  $^{13}\text{C}$  NMR (100 MHz,  $\text{CDCl}_3$ )  $\delta$  187.5, 146.4, 140.3, 132.9, 132.1, 130.6, 128.6, 120.2, 111.4, 90.5, 89.4, 56.8, 41.8, 41.7, 40.8, 40.7, 40.1, 35.6, 35.0, 32.3, 31.2, 26.6, 26.5, 26.2, 23.1; HRMS (ESI): calc. for  $\text{C}_{27}\text{H}_{32}\text{NaO}$   $[\text{M}+\text{Na}]^+$ : 38.2345; found: 395.2335.

*1-(2-Benzyl-1-(prop-1-en-2-yl)spiro[3.4]oct-1-en-6-yl)-4-phenylbut-3-yn-2-one* (**3i**)

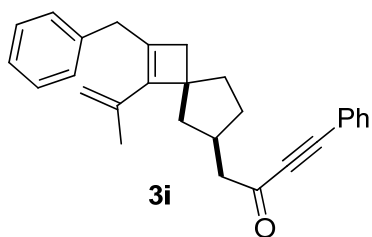

63% isolated yield, colorless oil.  $^1\text{H}$  NMR (400 MHz,  $\text{CDCl}_3$ )  $\delta$  7.52-7.48 (m, 2H), 7.48-7.42 (m, 1H), 7.40-7.34 (m, 2H), 7.25-7.20 (m, 2H), 7.16-7.07 (m, 3H), 4.89-4.85 (m, 1H), 4.73-4.68 (m, 1H), 3.39 (d,  $J = 14.9$  Hz, 1H), 3.34 (d,  $J = 14.9$  Hz, 1H), 2.79 (d,  $J = 14.2$  Hz, 1H), 2.76 (d,  $J = 14.2$  Hz, 1H), 2.51 (t,  $J = 4.5$  Hz, 1H), 2.24 (dd,  $J = 17.0, 1.3$  Hz, 1H), 1.98-1.61 (m, 10H);  $^{13}\text{C}$  NMR (100 MHz,  $\text{CDCl}_3$ )  $\delta$  187.2, 145.5, 143.7, 140.9, 132.9, 130.6, 128.6, 128.4, 128.2, 125.8, 125.6, 120.1, 112.5, 90.5, 89.3, 56.2, 44.9, 42.0, 41.8, 40.0, 38.6, 35.8, 34.9, 22.8; HRMS (ESI): calc. for  $\text{C}_{28}\text{H}_{28}\text{NaO}$   $[\text{M}+\text{Na}]^+$ : 403.2032; found: 403.2036.

## General procedure for palladium-catalyzed oxidative carbocyclization of enallenes for the formation of compounds 4

### Representative procedure B for the synthesis of 4a-4i.

Ethyl 2-(4-oxo-7-(2-oxo-4-phenylbut-3-yn-1-yl)-3-(prop-1-en-2-yl)spiro[4.4]non-2-en-2-yl)acetate (**4a**)

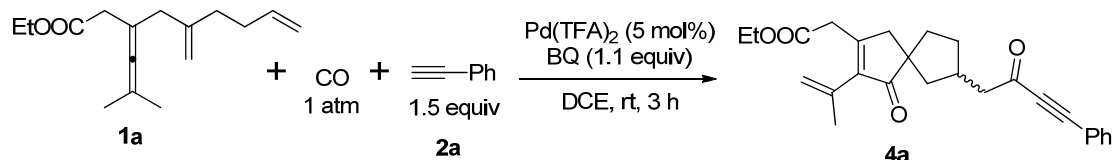

To a solution of Pd(TFA)<sub>2</sub> (3.3 mg, 0.01 mmol), BQ (23.8 mg, 0.22 mmol) and **2a** (30.6 mg, 0.3 mmol) in DCE (2 mL) were added enallene **1a** (49.6 mg, 0.2 mmol). The tube was closed with a septum. The tube was evacuated and filled with carbon monoxide gas (repeated three times) using a balloon. The reaction was stirred at room temperature for 3 h. After full consumption of starting material **1a** as monitored by TLC, the reaction mixture was evaporated and purified via column chromatography on silica gel (eluent: petroleum ether/ethyl ether = 5/1) afforded **4a** (72.7 mg, 90%, d/r = 91/9 determined by <sup>1</sup>H NMR analysis): colorless oil. <sup>1</sup>H NMR (400 MHz, CDCl<sub>3</sub>) δ 7.61-7.55 (m, 2H, ArH), 7.48-7.42 (m, 1H, ArH), 7.41-7.35 (m, 2H, ArH), 5.23-5.16 (m, 1H, one proton of =CH<sub>2</sub>), 4.87-4.81 (m, 1H, one proton of =CH<sub>2</sub>), 4.21-4.13 (m, 2H, OCH<sub>2</sub>), 3.50 (d, *J* = 15.5 Hz, 1H, one proton of CH<sub>2</sub>), 3.46 (d, *J* = 15.5 Hz, 1H, one proton of CH<sub>2</sub>), 2.93-2.80 (m, 1H, one proton of CH<sub>2</sub>), 2.76-2.57 (m, 4H, 2 × CH<sub>2</sub>), 2.34-2.26 (m, 0.91H, one proton of CH<sub>2</sub>), 2.22-2.12 (m, 0.91H, one proton of CH<sub>2</sub>), 2.20-1.88 (m, 4H, CH<sub>3</sub> + one proton of CH<sub>2</sub>), 1.66-1.54 (m, 1H, CH), 1.48-1.36 (m, 1H, one proton of CH<sub>2</sub>), 1.34-1.23 (m, 4H, CH<sub>3</sub> + one proton of CH<sub>2</sub>); <sup>13</sup>C NMR (100 M, Hz, CDCl<sub>3</sub>) the following signal is discernible for major isomer: δ 211.1, 187.2, 169.2, 161.4, 143.4, 137.2, 133.1, 130.7, 128.6, 119.9, 117.1, 91.1, 87.8, 61.2, 54.2, 51.8, 48.3, 43.2, 38.4, 37.1, 35.9, 33.1, 21.9, 14.1; HRMS (ESI): calc. for C<sub>26</sub>H<sub>28</sub>NaO<sub>4</sub> [M+Na]<sup>+</sup>: 427.1880, found: 427.1873.

The general method from above was used for preparation of the following compounds **4**:

*Ethyl 2-(3-(cyclopent-1-en-1-yl)-4-oxo-7-(2-oxo-4-phenylbut-3-yn-1-yl)spiro[4.4]non-2-en-2-yl)acetate (4b)*

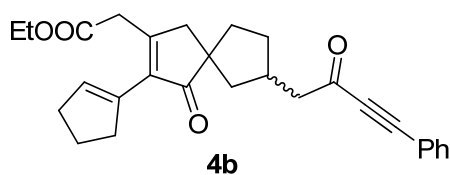

90% isolated yield, d/r = 95/5, colorless oil.  $^1\text{H}$  NMR (400 MHz,  $\text{CDCl}_3$ )  $\delta$  7.61-7.55 (m, 2H), 7.48-7.42 (m, 1H), 7.41-7.35 (m, 2H), 6.14-6.06 (m, 1H), 4.22-4.13 (m, 2H), 3.54 (d,  $J = 15.5$  Hz, 1H), 3.51 (d,  $J = 15.5$  Hz, 1H), 2.92-2.80 (m, 1H), 2.77-2.53 (m, 6H), 2.48-2.39 (m, 2H), 2.31 (dd,  $J = 13.2, 8.7$  Hz, 0.95H), 2.21-2.12 (m, 0.95H), 1.99-1.85 (m, 3H), 1.64-1.53 (m, 1H), 1.47-1.35 (m, 1H), 1.33-1.24 (m, 4H);  $^{13}\text{C}$  NMR (100 M, Hz,  $\text{CDCl}_3$ ) the following signal is discernible for major isomer:  $\delta$  211.6, 187.2, 169.3, 160.6, 137.4, 134.4, 133.1, 133.0, 130.7, 128.6, 119.9, 91.1, 87.9, 61.2, 54.1, 51.8, 48.7, 43.3, 38.6, 37.7, 35.9, 34.6, 33.1, 33.0, 23.4, 14.2; HRMS (ESI): calc. for  $\text{C}_{28}\text{H}_{30}\text{NaO}_4$   $[\text{M}+\text{Na}]^+$ : 453.2036; found: 453.2029.

*Ethyl 2-(3-(cyclohex-1-en-1-yl)-4-oxo-7-(2-oxo-4-phenylbut-3-yn-1-yl)spiro[4.4]non-2-en-2-yl)acetate (4c)*

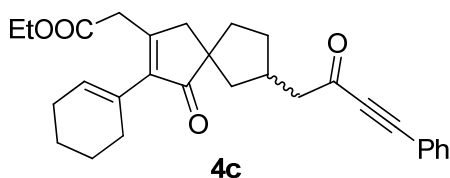

93% isolated yield, d/r = 91/9, colorless oil.  $^1\text{H}$  NMR (400 MHz,  $\text{CDCl}_3$ )  $\delta$  7.61-7.54 (m, 2H), 7.48-7.41 (m, 1H), 7.41-7.35 (m, 2H), 5.60-5.53 (m, 1H), 4.21-4.13 (m, 2H), 3.46 (d,  $J = 15.5$  Hz, 1H), 3.44 (d,  $J = 15.5$  Hz, 1H), 2.93-2.79 (m, 1H), 2.74-2.56 (m, 4H), 2.29 (dd,  $J = 13.2, 8.7$  Hz, 0.95H), 2.20-2.07 (m, 5H), 1.97-1.88 (m, 0.91H), 1.71-1.52 (m, 5H), 1.47-1.34 (m, 1H), 1.33-1.24 (m, 4H);  $^{13}\text{C}$  NMR (100 M, Hz,  $\text{CDCl}_3$ ) the following signal is discernible for major isomer:  $\delta$  211.7, 187.3, 169.4, 160.8, 143.8, 133.1, 130.7, 128.7, 128.6, 119.9, 91.1, 87.8, 61.1, 54.1, 51.8, 48.1, 43.2, 38.4, 37.2, 35.8, 33.1, 27.3, 25.3, 22.4, 21.9, 14.1; HRMS (ESI): calc. for  $\text{C}_{29}\text{H}_{32}\text{NaO}_4$   $[\text{M}+\text{Na}]^+$ : 467.2193; found: 467.2187.

*(E)-Ethyl 2-(3-(cyclooct-1-en-1-yl)-4-oxo-7-(2-oxo-4-phenylbut-3-yn-1-yl)spiro[4.4]non-2-en-2-yl)acetate (4d)*

*non-2-en-2-yl)acetate (4d)*

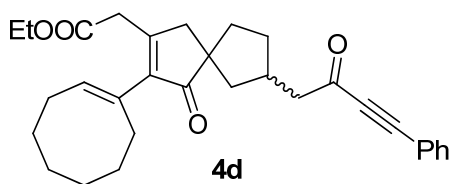

89% isolated yield, d/r = 93/7, colorless oil.  $^1\text{H}$  NMR (400 MHz,  $\text{CDCl}_3$ )  $\delta$  7.60-7.55 (m, 2H), 7.48-7.42 (m, 1H), 7.41-7.35 (m, 2H), 5.57-5.44 (m, 1H), 4.24-4.10 (m, 2H), 3.51 (d,  $J = 15.3$  Hz, 1H), 3.48 (d,  $J = 15.3$  Hz, 1H), 2.92-2.79 (m, 1H), 2.77-2.57 (m, 4H), 2.38-2.11 (m, 6H), 1.99-1.87 (m, 0.93H), 1.65-1.37 (m, 10H), 1.33-1.23 (m, 4H);  $^{13}\text{C}$  NMR (100 M, Hz,  $\text{CDCl}_3$ ) the following signal is discernible for major isomer:  $\delta$  211.9, 187.3, 169.4, 161.2, 144.3, 133.5, 133.1, 131.9, 130.7, 128.6, 119.9, 91.1, 87.8, 51.2, 54.0, 51.8, 48.1, 43.2, 38.4, 37.2, 35.9, 33.1, 29.5, 28.5, 28.1, 26.5, 26.4, 26.3, 14.1; HRMS (ESI): calc. for  $\text{C}_{31}\text{H}_{36}\text{NaO}_4$   $[\text{M}+\text{Na}]^+$ : 495.2506; found: 495.2516.

*3-Benzyl-7-(2-oxo-4-phenylbut-3-yn-1-yl)-2-(prop-1-en-2-yl)spiro[4.4]non-2-en-1-one (4i)*

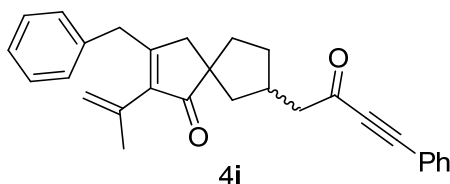

88% isolated yield, d/r = 88/12, colorless oil.  $^1\text{H}$  NMR (400 MHz,  $\text{CDCl}_3$ ) 7.60-7.53 (m, 2H), 7.48-7.42 (m, 1H), 7.41-7.35 (m, 2H), 7.35-7.29 (m, 2H), 7.28-7.22 (m, 1H), 7.16-7.10 (m, 2H), 5.28-5.23 (m, 1H), 4.94-4.90 (m, 1H), 3.82 (d,  $J = 14.8$  Hz, 1H), 3.78 (d,  $J = 14.8$  Hz, 1H), 2.90-2.77 (m, 1H), 2.71-2.59 (m, 2H), 2.50-2.36 (m, 2H), 2.28 (dd,  $J = 13.2, 8.7$  Hz, 1H), 2.18-2.07 (m, 0.88H), 2.04-1.86 (m, 4H), 1.54-1.46 (m, 1H, CH), 1.39-1.16 (m, 2H);  $^{13}\text{C}$  NMR (100 M, Hz,  $\text{CDCl}_3$ ) the following signal is discernible for major isomer:  $\delta$  211.6, 187.3, 168.5, 137.5, 133.1, 130.7, 128.8, 128.7, 128.6, 126.7, 119.9, 116.8, 91.1, 87.8, 53.9, 51.7, 47.5, 43.2, 38.4, 37.4, 35.9, 33.1, 22.4; HRMS (ESI): calc. for  $\text{C}_{29}\text{H}_{28}\text{NaO}_2$   $[\text{M}+\text{Na}]^+$ : 431.1982; found: 431.1977.

*Ethyl 2-(7-(4-(2-methoxyphenyl)-2-oxobut-3-yn-1-yl)-4-oxo-3-(prop-1-en-2-yl)spiro[4.4]non-2-en-2-yl)acetate (4ab)*



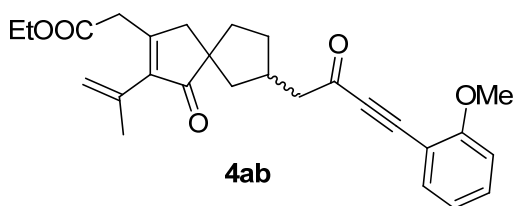

84% isolated yield, d/r = 90/10, colorless oil.  $^1\text{H}$  NMR (400 MHz,  $\text{CDCl}_3$ )  $\delta$  7.53-7.47 (m, 1H), 7.45-7.36 (m, 1H), 6.98-6.86 (m, 2H), 5.23-5.15 (m, 1H), 4.88-4.80 (m, 1H), 4.21-4.12 (m, 2H), [3.91 (s), 3.89 (s), 3H], 3.49 (d,  $J = 15.5$  Hz, 1H), 3.46 (d,  $J = 15.5$  Hz, 1H), 2.97-2.80 (m, 1H), 2.74-2.58 (m, 4H), 2.32 (dd,  $J = 13.2, 8.9$  Hz, 0.9H), 2.23-2.13 (m, 0.91H), 1.98-1.88 (m, 4H), 1.64-1.56 (m, 1H), 1.46-1.35 (m, 1H), 1.35-1.23 (m, 4H);  $^{13}\text{C}$  NMR (100 M, Hz,  $\text{CDCl}_3$ ) the following signal is discernible for major isomer:  $\delta$  211.1, 187.4, 169.2, 161.4, 143.4, 137.2, 135.0, 132.5, 120.5, 117.1, 110.8, 109.1, 91.9, 88.7, 61.2, 55.8, 54.2, 51.9, 48.3, 43.2, 38.6, 37.1, 35.9, 33.1, 21.9, 14.1; HRMS (ESI): calc. for  $\text{C}_{27}\text{H}_{30}\text{NaO}_5$   $[\text{M}+\text{Na}]^+$ : 457.1985; found: 457.1981.

*Ethyl 2-(4-oxo-7-(2-oxo-4-(p-tolyl)but-3-yn-1-yl)-3-(prop-1-en-2-yl)spiro[4.4]non-2-en-2-yl)acetate (4ad)*

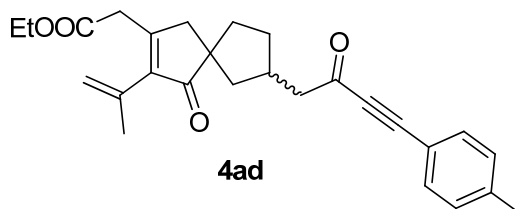

87% isolated yield, d/r = 92/8, colorless oil.  $^1\text{H}$  NMR (400 MHz,  $\text{CDCl}_3$ )  $\delta$  7.50-7.43 (m, 2H), 7.22-7.15 (m, 2H), 5.22-5.17 (m, 1H), 4.86-4.81 (m, 1H), 4.21-4.13 (m, 2H), 3.49 (d,  $J = 15.6$  Hz, 1H), 3.47 (d,  $J = 15.6$  Hz, 1H), 2.90-2.79 (m, 1H), 2.76-2.59 (m, 4H), 2.38 (s, 3H), 2.31 (dd,  $J = 13.2, 8.7$  Hz, 0.92H), 2.21-2.12 (m, 0.92H), 1.99-1.88 (m, 4H), 1.65-1.53 (m, 1H), 1.46-1.35 (m, 1H), 1.34-1.22 (m, 4H);  $^{13}\text{C}$  NMR (100 M, Hz,  $\text{CDCl}_3$ ) the following signal is discernible for major isomer:  $\delta$  211.1, 187.3, 169.2, 161.4, 143.4, 141.5, 137.2, 133.1, 129.4, 117.1, 116.8, 91.8, 87.7, 61.2, 54.2, 51.8, 48.3, 43.2, 38.5, 37.1, 35.9, 33.1, 21.9, 21.7, 14.1; HRMS (ESI): calc. for  $\text{C}_{27}\text{H}_{30}\text{NaO}_4$   $[\text{M}+\text{Na}]^+$ : 441.2036; found: 441.2030.

*Ethyl 2-(4-oxo-7-(2-oxo-4-(thiophen-2-yl)but-3-yn-1-yl)-3-(prop-1-en-2-yl)spiro[4.4]*

*non-2-en-2-yl)acetate (4ah)*

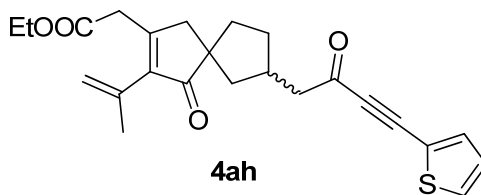

72% isolated yield, d/r = 91/9, colorless oil.  $^1\text{H}$  NMR (400 MHz,  $\text{CDCl}_3$ )  $\delta$  7.56-7.45 (m, 2H), 7.12-7.03 (m, 1H), 5.25-5.14 (m, 1H), 4.87-4.82 (m, 1H), 4.22-4.13 (m, 2H), 3.50 (d,  $J = 15.5$  Hz, 1H), 3.47 (d,  $J = 15.5$  Hz, 1H), 2.88-2.78 (m, 1H), 2.76-2.60 (m, 4H), 2.31 (dd,  $J = 13.3, 8.7$  Hz, 1H), 2.21-2.12 (m, 0.91H), 1.99-1.89 (m, 4H), 1.66-1.58 (m, 1H), 1.46-1.37 (m, 1H), 1.34-1.24 (m, 4H);  $^{13}\text{C}$  NMR (100 M, Hz,  $\text{CDCl}_3$ ) the following signal is discernible for major isomer:  $\delta$  211.1, 186.7, 169.2, 161.4, 143.4, 137.2, 136.8, 131.7, 127.7, 119.7, 117.1, 92.5, 85.0, 61.3, 54.2, 51.5, 48.3, 43.2, 38.5, 37.1, 35.8, 33.1, 21.9, 14.1; HRMS (ESI): calc. for  $\text{C}_{24}\text{H}_{26}\text{NaO}_4\text{S}$   $[\text{M}+\text{Na}]^+$ : 433.1444; found: 433.1442.

*Ethyl 2-(4-oxo-7-(2-oxo-4-(thiophen-3-yl)but-3-yn-1-yl)-3-(prop-1-en-2-yl)spiro[4.4])non-2-en-2-yl)acetate (4ai)*

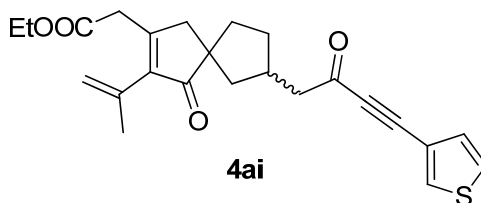

78% isolated yield, d/r = 88/12, colorless oil.  $^1\text{H}$  NMR (400 MHz,  $\text{CDCl}_3$ )  $\delta$  [7.78 (dd,  $J = 2.9, 1.2$  Hz), 7.75 (dd,  $J = 3.0, 1.2$  Hz), 1H], 7.35-7.31 (m, 1H), 7.25-7.21 (m, 1H), 5.22-5.19 (m, 1H), 4.86-4.82 (m, 1H), 4.21-4.14 (m, 2H), 3.49 (d,  $J = 15.5$  Hz, 1H), 3.47 (d,  $J = 15.5$  Hz, 1H), 2.90-2.79 (m, 1H), 2.75-2.59 (m, 4H), 2.30 (dd,  $J = 13.2, 8.6$  Hz, 1H), 2.20-2.12 (m, 1H), 2.00-1.89 (m, 4H), 1.66-1.51 (m, 1H), 1.46-1.36 (m, 1H), 1.33-1.24 (m, 4H);  $^{13}\text{C}$  NMR (100 M, Hz,  $\text{CDCl}_3$ ) the following signal is discernible for major isomer:  $\delta$  211.1, 187.2, 169.2, 161.4, 143.4, 137.2, 134.0, 130.3, 126.2, 119.2, 117.1, 88.1, 86.6, 61.3, 54.1, 51.6, 48.3, 43.2, 38.4, 37.1, 35.9, 33.1, 21.8, 14.1; HRMS (ESI): calc. for  $\text{C}_{24}\text{H}_{26}\text{NaO}_4\text{S}$   $[\text{M}+\text{Na}]^+$ : 433.1444; found: 433.1437.

### Kinetic Isotope Effect (KIE) Experiments

## 1. Determination of Intermolecular Competition KIE

To a solution of Pd(TFA)<sub>2</sub> (3.3 mg, 0.01 mmol) and F<sub>4</sub>-BQ (39.6 mg, 0.22 mmol) in CD<sub>3</sub>CN (3.0 mL) were added enallene **1a** (24.8 mg, 0.1 mmol), enallene **1a-d<sub>6</sub>** (25.4 mg, 0.1 mmol), phenylacetylene (30.6 mg, 0.3 mmol), and CD<sub>3</sub>CN (3.0 mL) sequentially. The tube was closed with a septum. The tube was evacuated and filled with carbon monoxide gas using a balloon for three times. The reaction was stirred at 80 °C for 90 seconds, then quickly evaporated. The yields of **3a** and **3a-d<sub>5</sub>** were determined by <sup>1</sup>H NMR measurement using anisole as the internal standard (22 μL, 0.2 mmol).

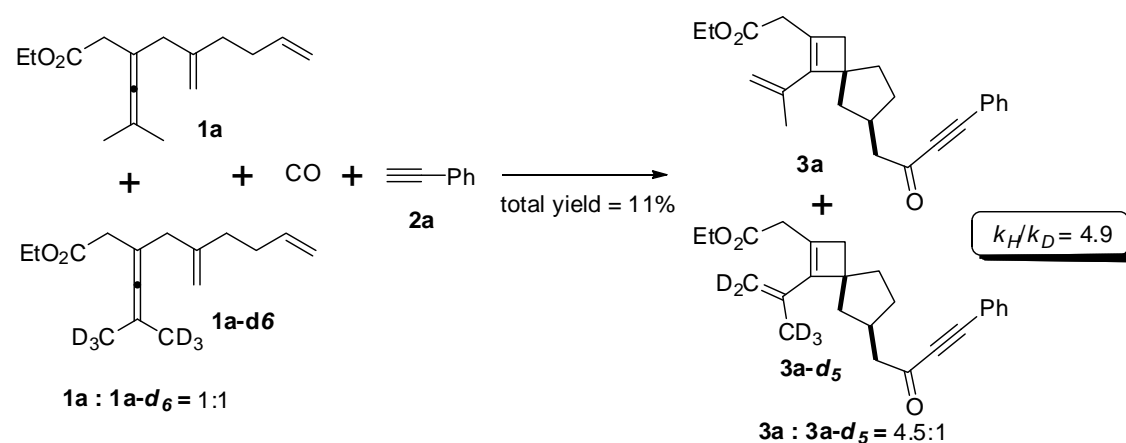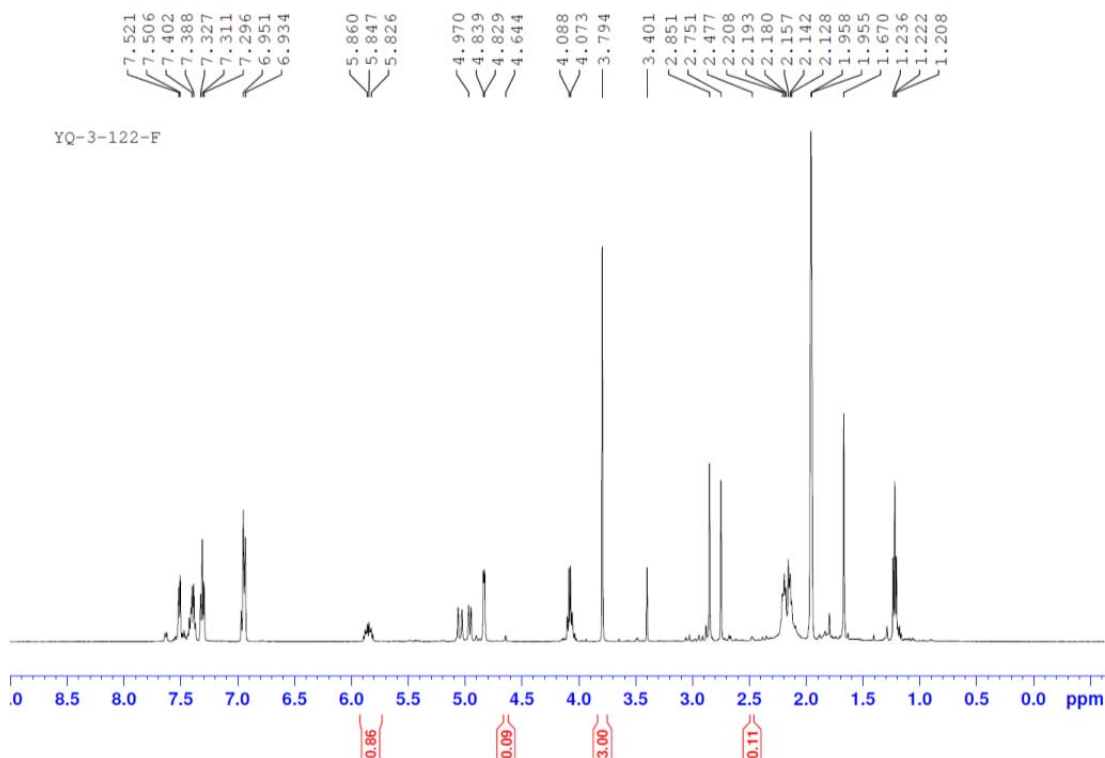

As shown in the attached spectra, the combined yield of **3a** and **3a-d<sub>5</sub>** was 11%, and the yield of **3a** was 9%, thus the yield of **3a-d<sub>5</sub>** was 2%. Therefore, the ratio of **3a** and **3a-d<sub>5</sub>** was determined as 4.5:1. Furthermore, the combined recovery of **1a** and **1a-d<sub>6</sub>** was 86% [Integration of (H<sup>a</sup>+H<sup>b</sup>)], so the reaction conversion was 11.3%. Finally, the isotope effect value calculated from the product ratio and conversion of the reaction is 4.9 according to Sih's equation.<sup>[4]</sup>

## 2. Intermolecular KIE Experiments (Separate experiments)

To a solution of Pd(TFA)<sub>2</sub> (3.3 mg, 0.01 mmol) and F<sub>4</sub>-BQ (39.6 mg, 0.22 mmol) in CD<sub>3</sub>CN (3.0 mL) were added enallene **1a** (49.6 mg, 0.2 mmol), enallene **1a-d<sub>6</sub>** (50.8 mg, 0.2 mmol), phenylacetylene (30.6 mg, 0.3 mmol), and CD<sub>3</sub>CN (3.0 mL) sequentially. The tube was closed with a septum. The tube was evacuated and filled with carbon monoxide gas using a balloon for three times. The reaction was stirred at room temperature and recorded at different time (see **Table S2** and **S3** respectively). The yields were determined by <sup>1</sup>H NMR measurement using anisole as the internal standard.

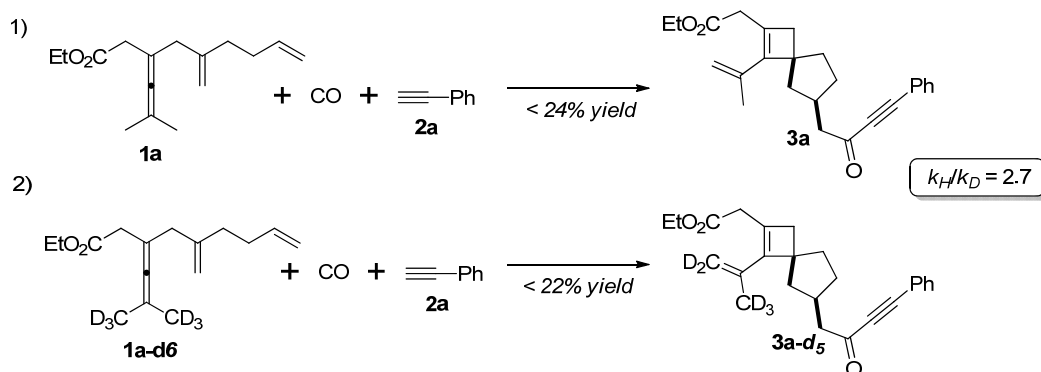

**Table S2.** For **1a**:

|                       |    |    |    |    |     |
|-----------------------|----|----|----|----|-----|
| Time/s                | 20 | 35 | 60 | 90 | 120 |
| Yield of <b>3a</b> /% | 4  | 8  | 14 | 19 | 24  |

Due to the nature of the experiment, plots to determine the KIE were taken for **1a** (Figures S1).

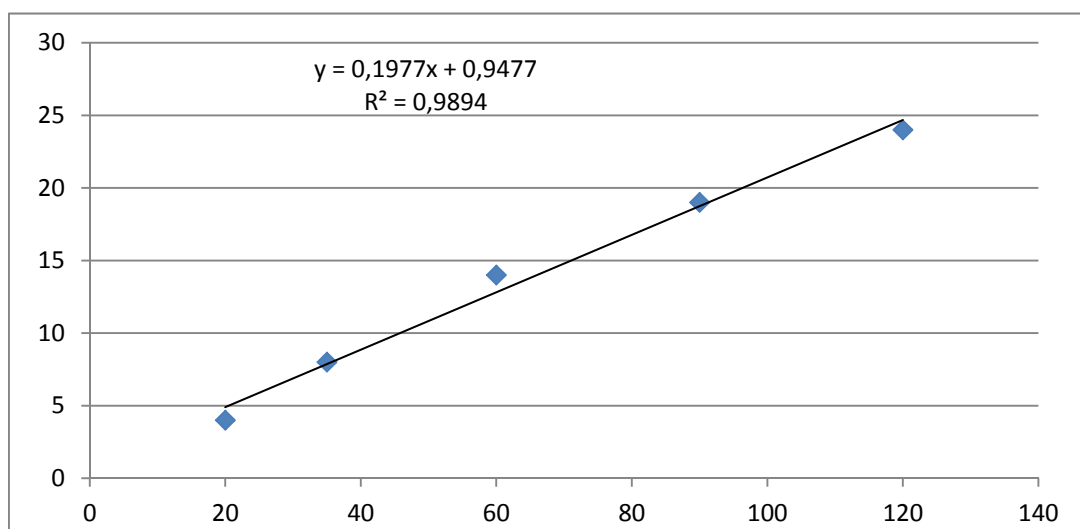

**Figure S1.** Linear function fit for reaction rate of **1a**.

**Table S3.** For **1a-d<sub>6</sub>**:

| Time/s                              | 90 | 120 | 150 | 180 | 240 |
|-------------------------------------|----|-----|-----|-----|-----|
| Yield of <b>3a-d<sub>5</sub></b> /% | 11 | 13  | 16  | 18  | 22  |

Due to the nature of the experiment, plots to determine the KIE were taken for **1a-d<sub>6</sub>** (Figures S2).

**Figure S2.** Linear function fit for reaction rate of **1a-d<sub>6</sub>**.

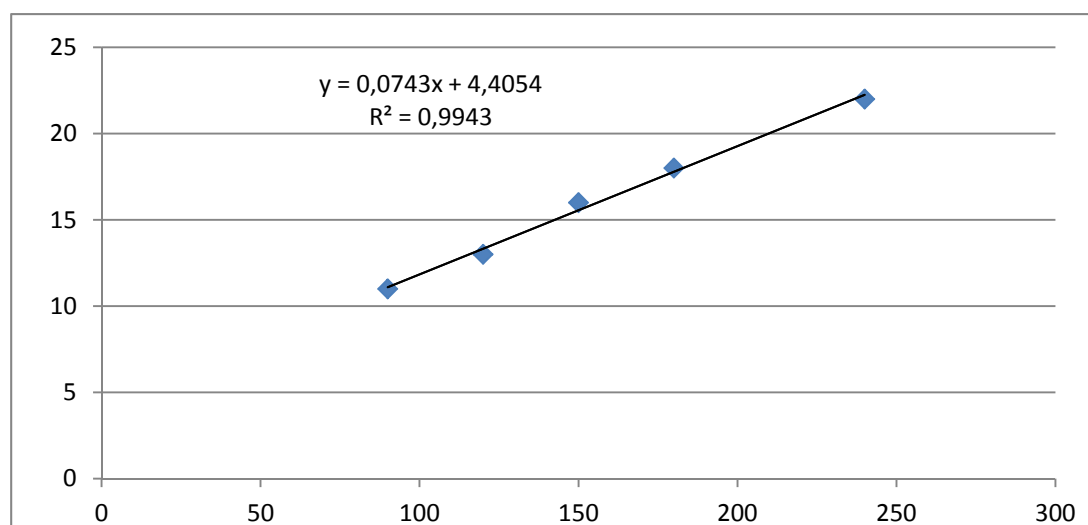

Finally, the intermolecular isotope effect value is determined as 2.7.

$$k_H/k_D = (0.1977)/(0.0743) = 2.7$$

## The spiro[3,4]octene derivatives 3 as single isomers

Re-face coordination is favored over si-face coordination.

*Re-face coordination:*

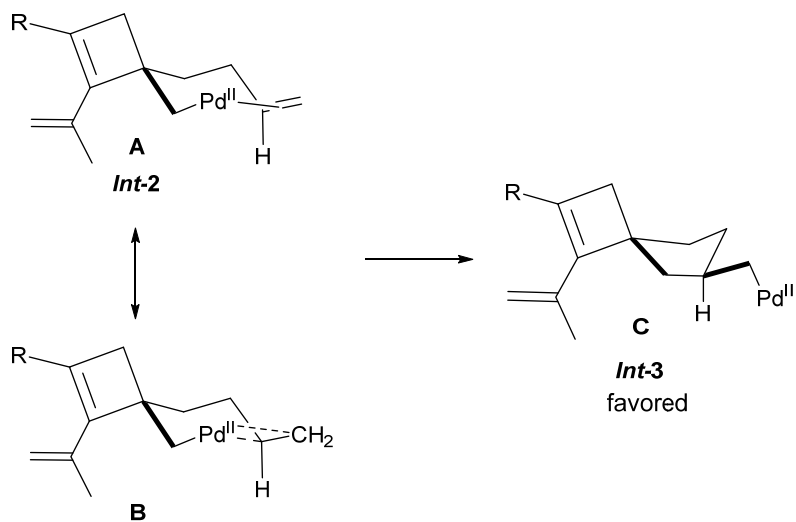

*Si-face coordination:*

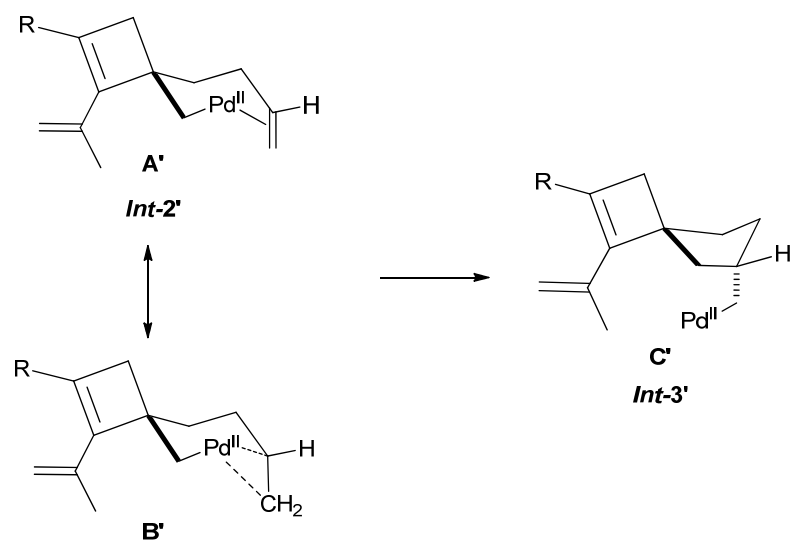

### Determination of relative stereochemistry of **3a**

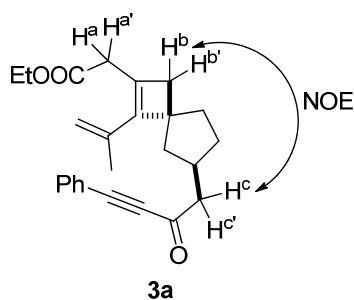

The assignment of <sup>1</sup>H NMR signals for **3a** was as follows: <sup>1</sup>H NMR (400 MHz, CDCl<sub>3</sub>) δ 7.60-7.54 (m, 2H, ArH), 7.48-7.42 (m, 1H, ArH), 7.41-7.35 (m, 2H, ArH), 4.91-4.84 (m, 1H, one proton of =CH<sub>2</sub>), 4.67-4.62 (m, 1H, one proton of =CH<sub>2</sub>), 4.08 (q, *J* = 7.1 Hz, 2H, OCH<sub>2</sub>), 3.08 (d, *J* = 15.7 Hz, 1H, H<sup>a</sup>), 2.94 (d, *J* = 15.7 Hz, 1H, H<sup>a'</sup>), 2.86 (d, *J* = 14.2 Hz, 1H, H<sup>b</sup>), 2.82 (d, *J* = 14.2 Hz, 1H, H<sup>b'</sup>), 2.47 (t, *J* = 4.0 Hz, 1H, one proton of CH<sub>2</sub>), 2.37 (br. d, *J* = 16.8 Hz, 1H, H<sup>c</sup>), 2.11 (br. d, *J* = 16.8 Hz, 1H, H<sup>c'</sup>), 1.89-1.71 (m, 8H, CH<sub>3</sub> + CH<sub>2</sub> + one proton of CH<sub>2</sub>), 1.64 (ddd, *J* = 10.7, 4.1, 1.0 Hz, 1H, CH), 1.22 (t, *J* = 7.1 Hz, 3H, CH<sub>3</sub>).

We were able to assign H<sup>a</sup>, H<sup>a'</sup> in **3a** by comparing the <sup>1</sup>H NMR spectra of products **3a** and **3g**. A clear NOE was observed between H<sup>b</sup>(H<sup>b'</sup>) and H<sup>c</sup> in **3a** (see p. S57). Thus, the relative stereochemistry of CH<sup>b</sup>H<sup>b'</sup> and CH<sup>c</sup>H<sup>c'</sup> in **3a** could be determined to be cis to one another as shown in the above structure.



## References:

- (1) (a) Zhu, C.; Yang, B.; Jiang, T.; Bäckvall, J.-E. *Angew. Chem. Int. Ed.* **2015**, *54*, 9066. (b) Zhu, C.; Yang, B.; Bäckvall, J.-E. *J. Am. Chem. Soc.* **2015**, *137*, 11868. (c) Qiu, Y.; Yang, B.; Zhu, C.; Bäckvall, J.-E. *Angew. Chem. Int. Ed.* **2016**, *55*, 6520.
- (2) Sherwood, T. C.; Trotta, A. H.; Snyder, S. A. *J. Am. Chem. Soc.* **2014**, *136*, 9743.
- (3) Kessler, S. N.; Bäckvall, J.-E. *Angew. Chem. Int. Ed.* **2016**, *55*, 3734.
- (4) Chen, C.-S.; Fujimoto, Y.; Girdaukas, G.; Sih, C. J. *J. Am. Chem. Soc.* **1982**, *104*, 7294.

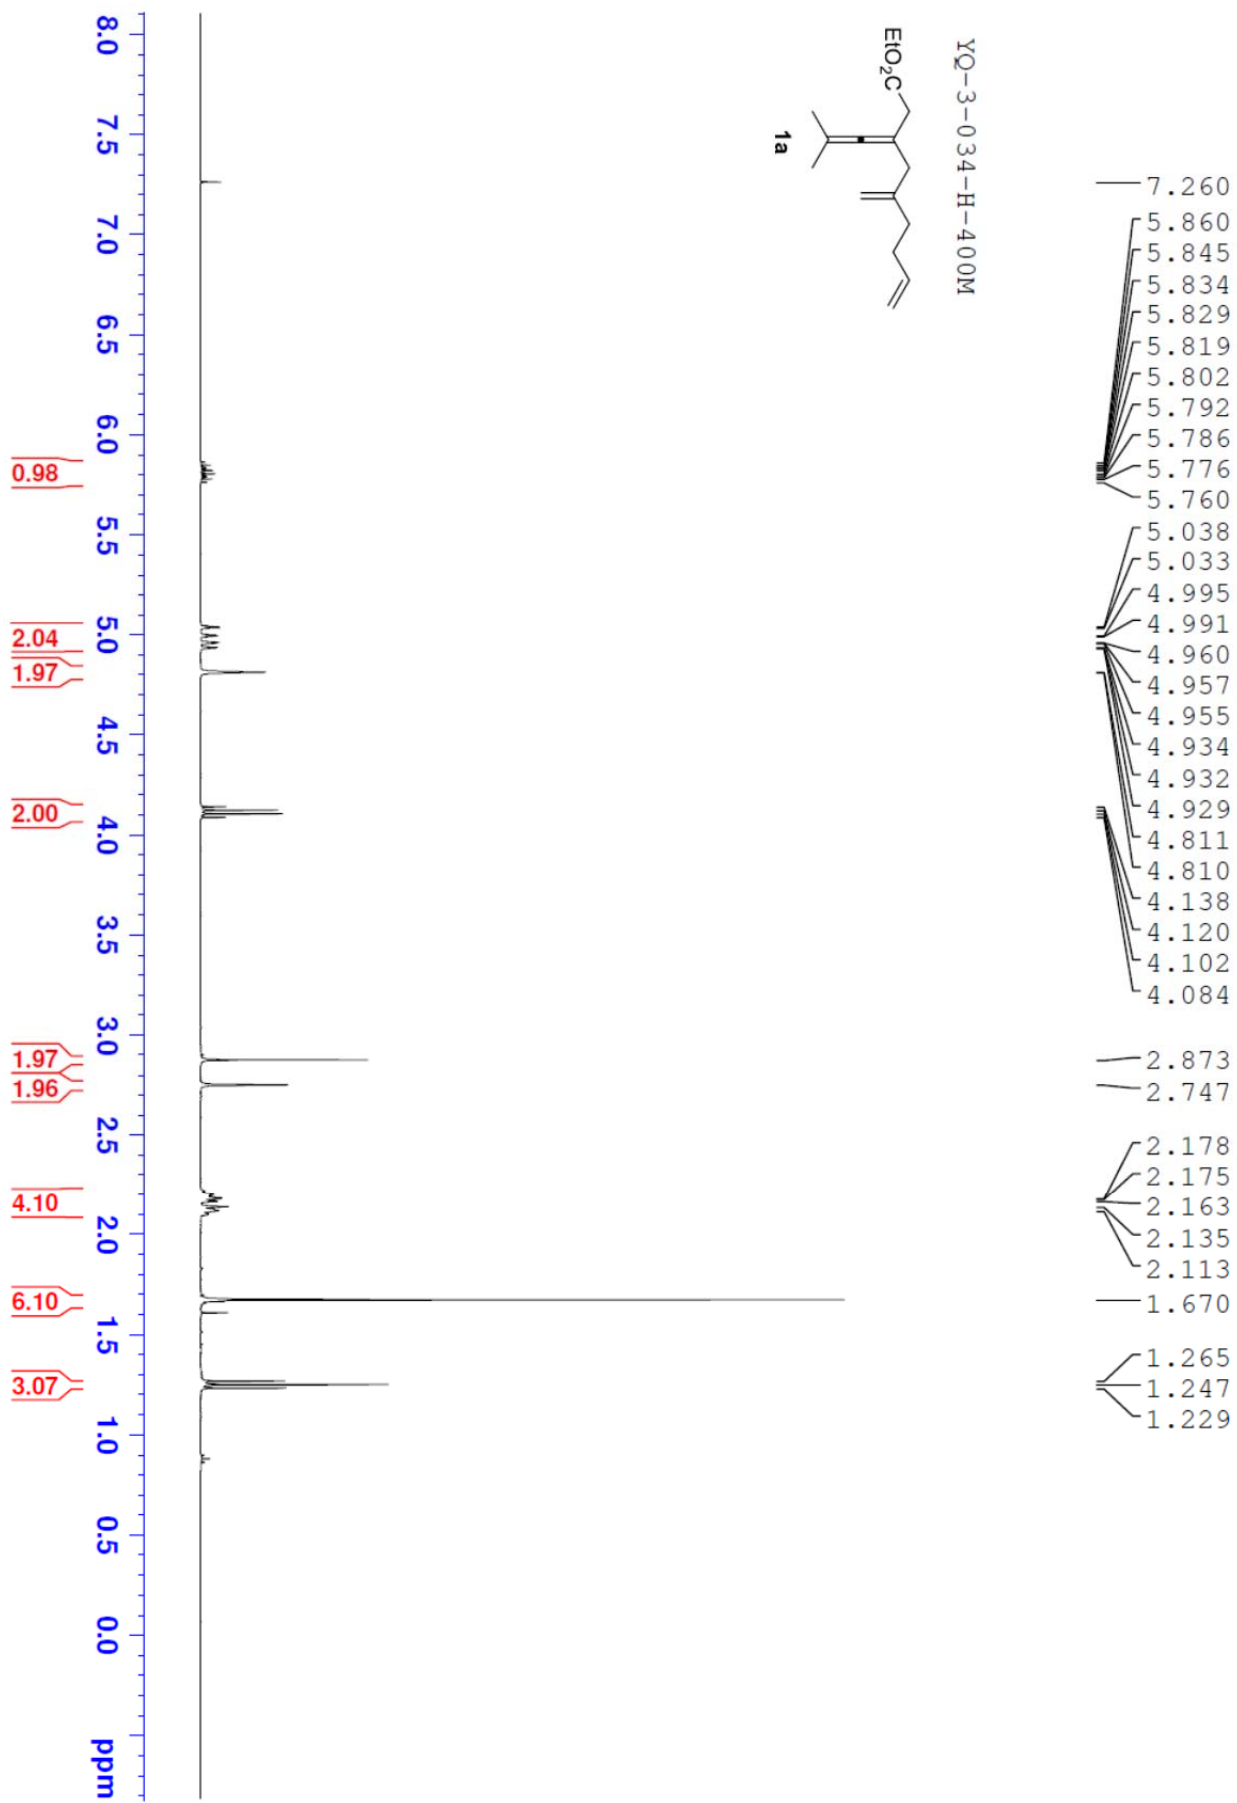

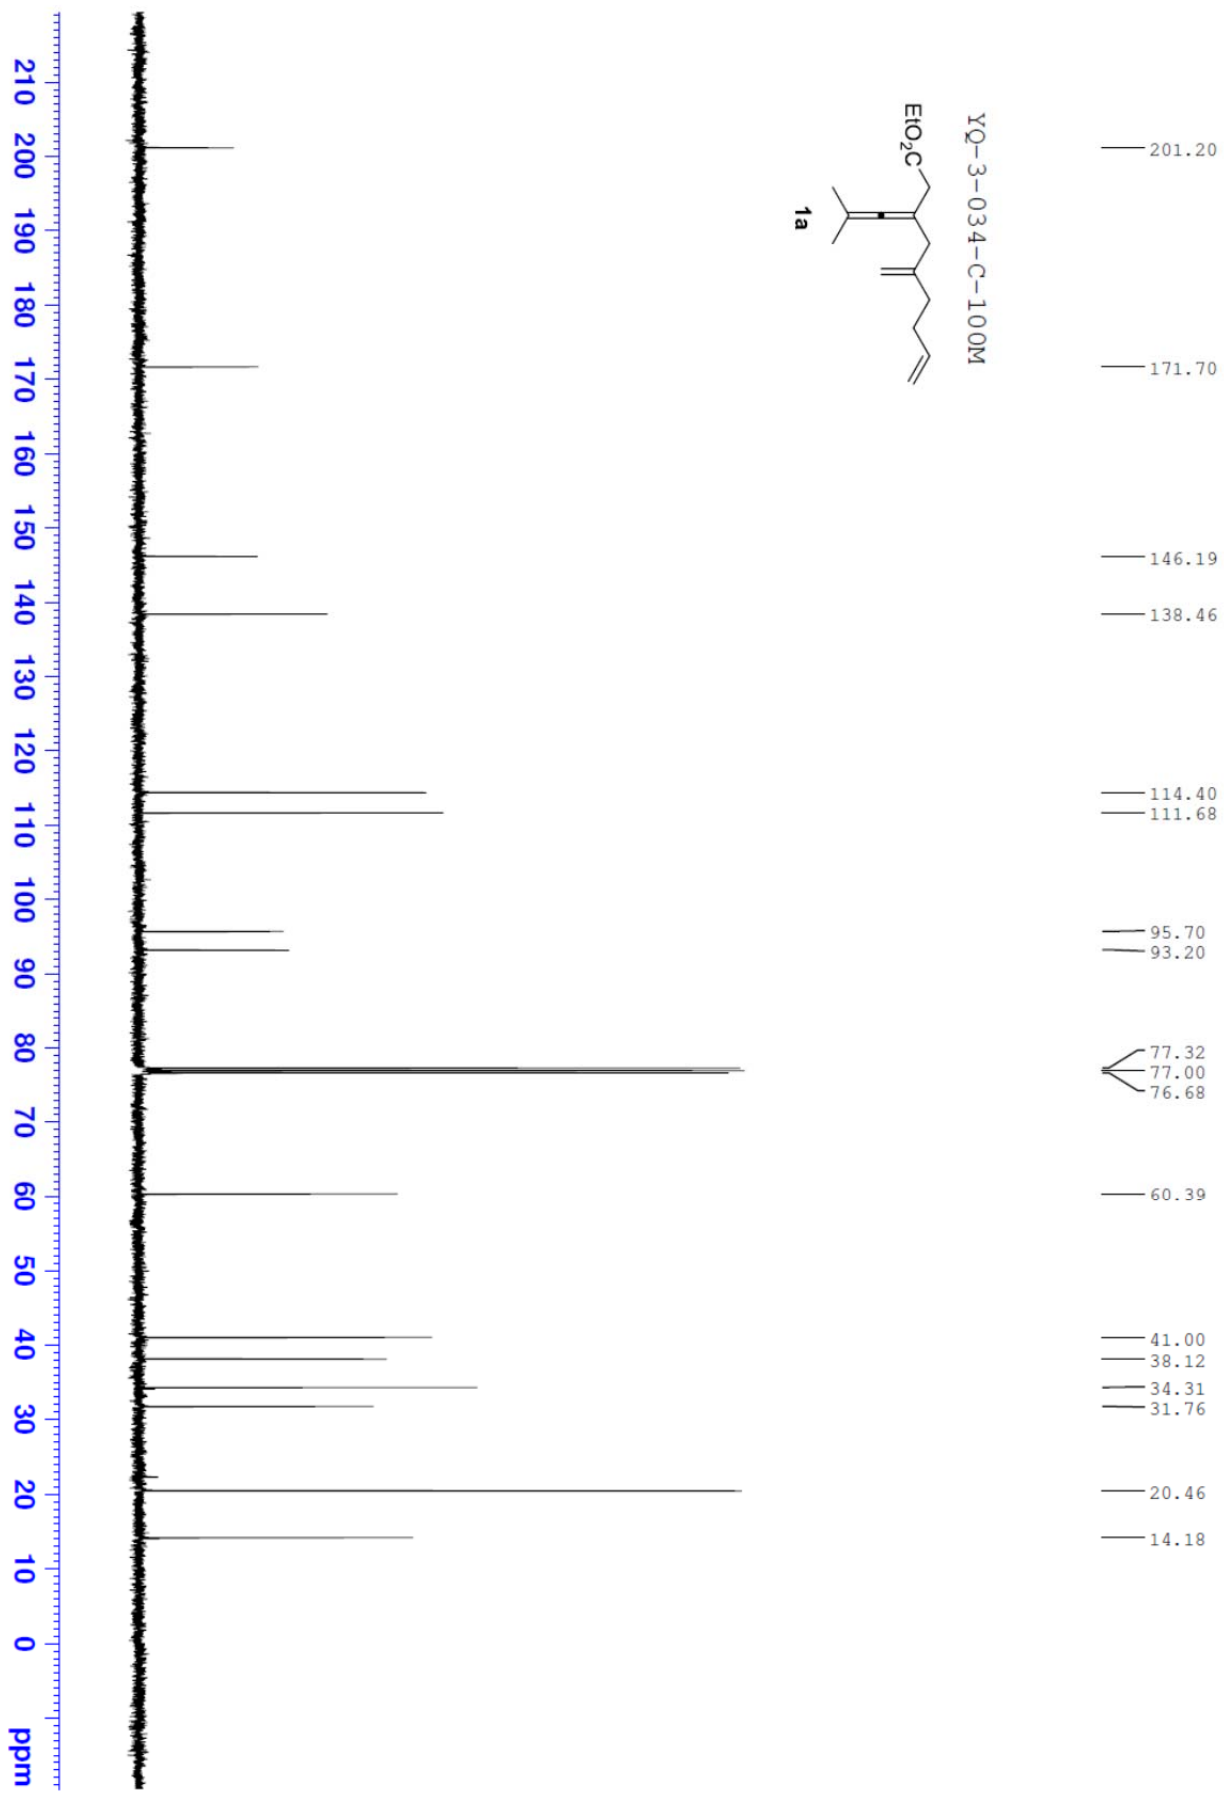

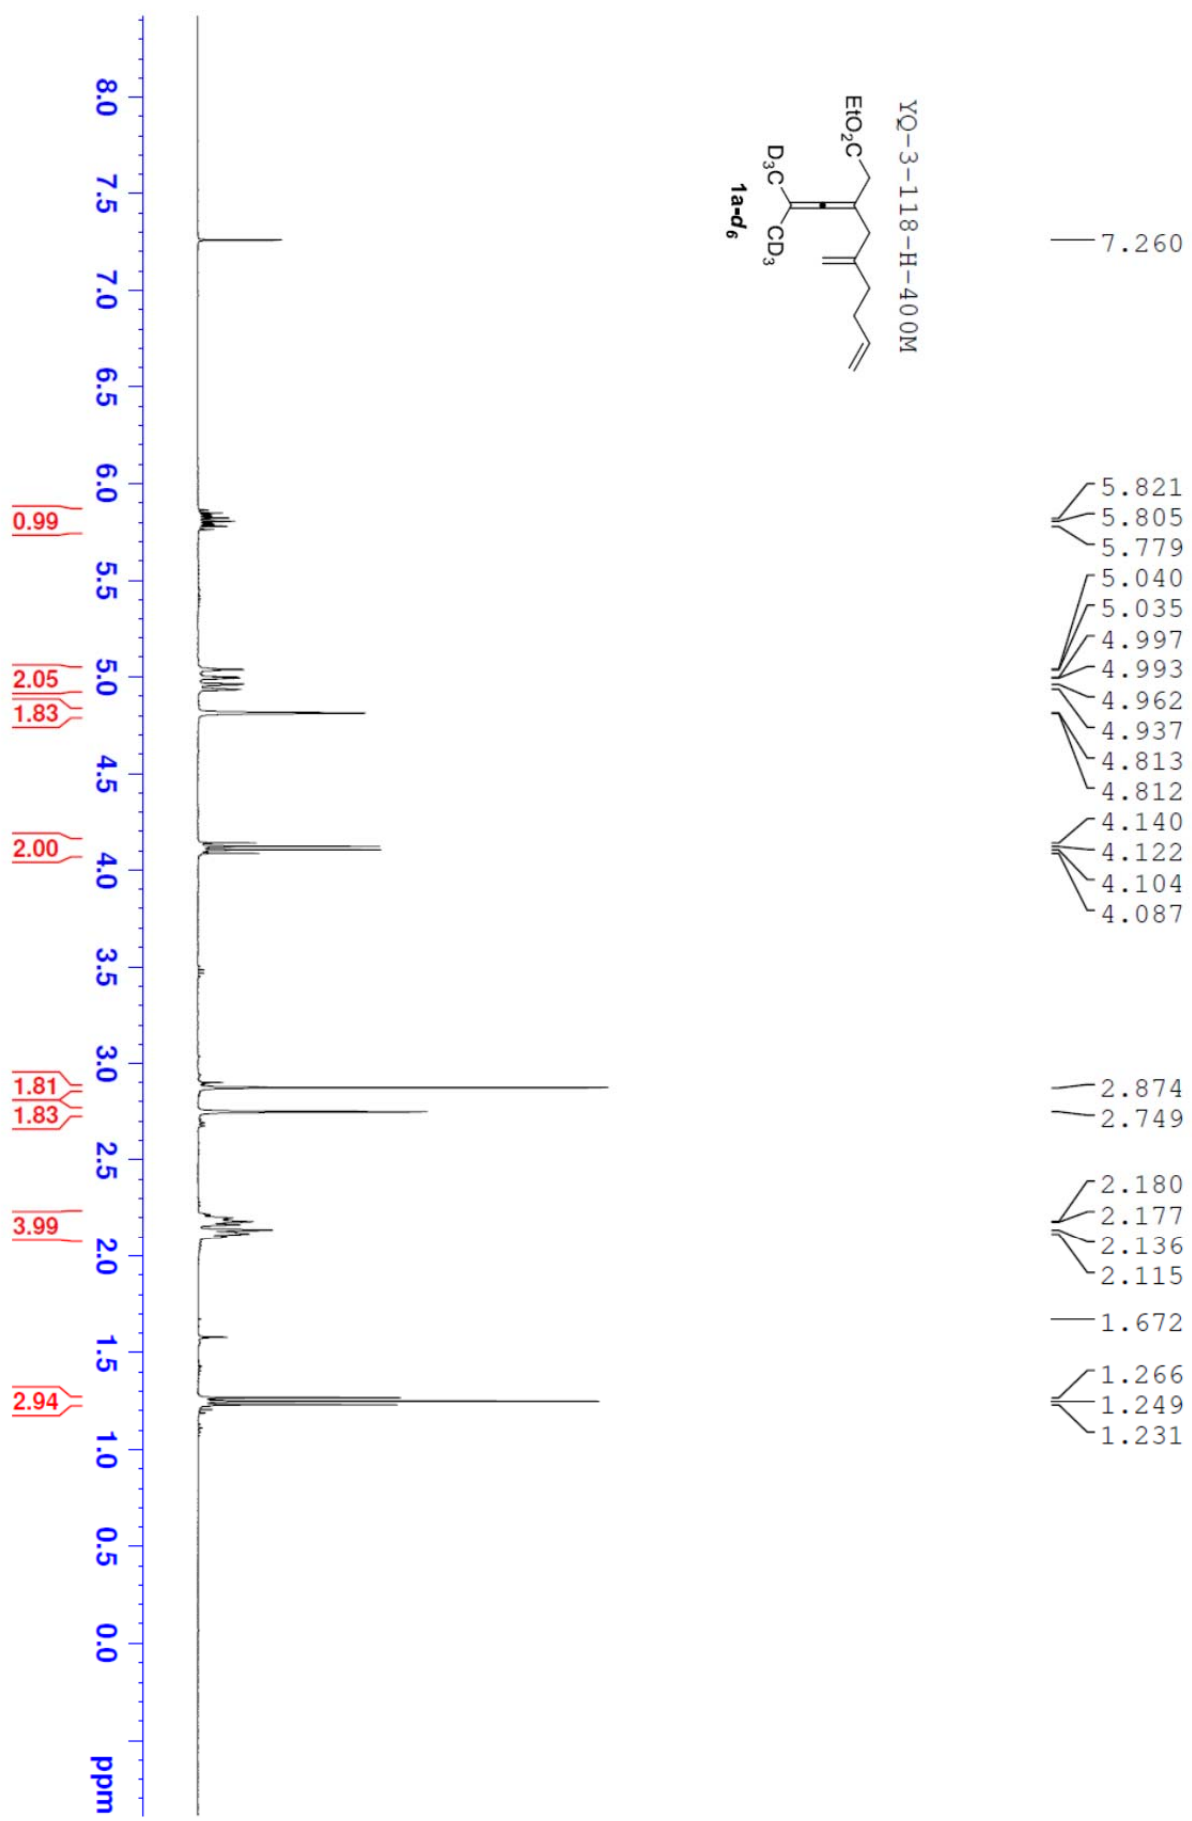

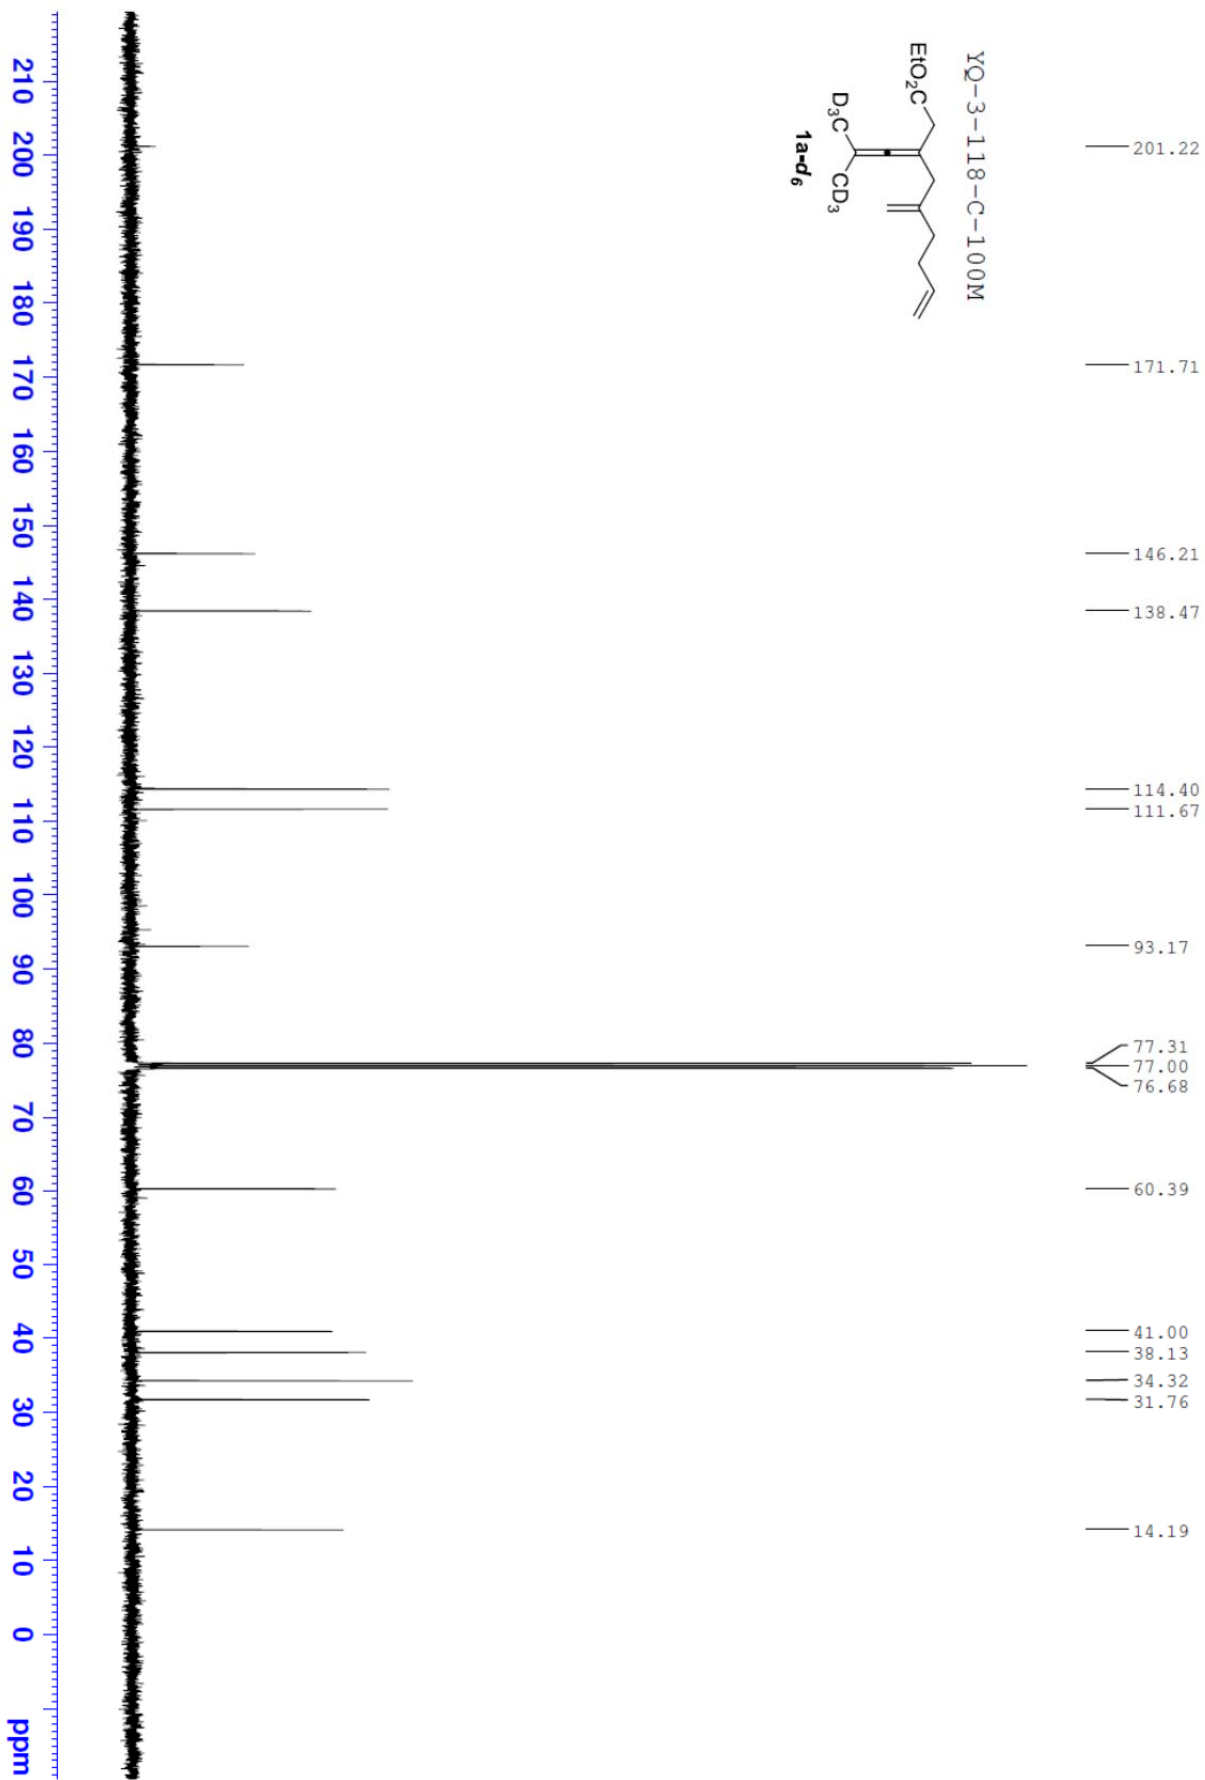

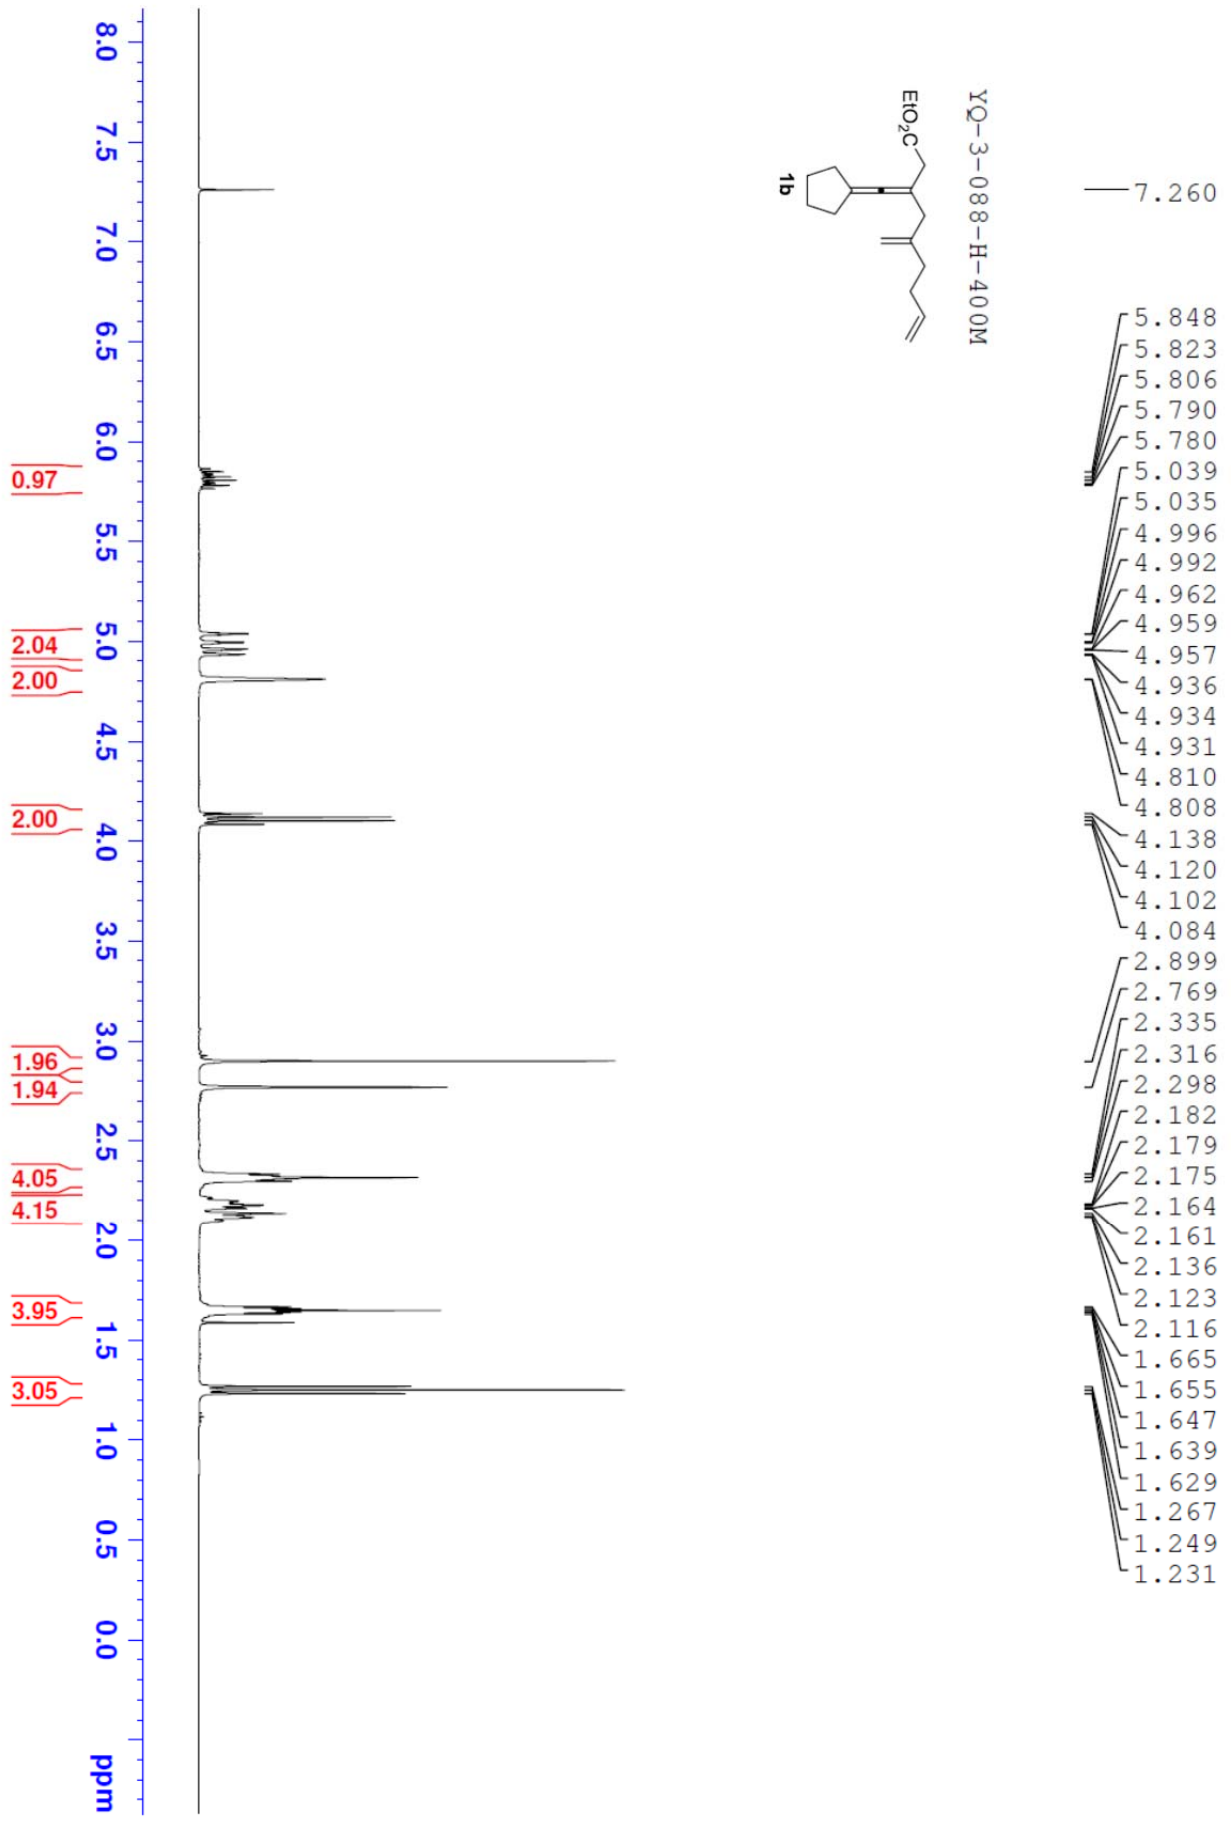

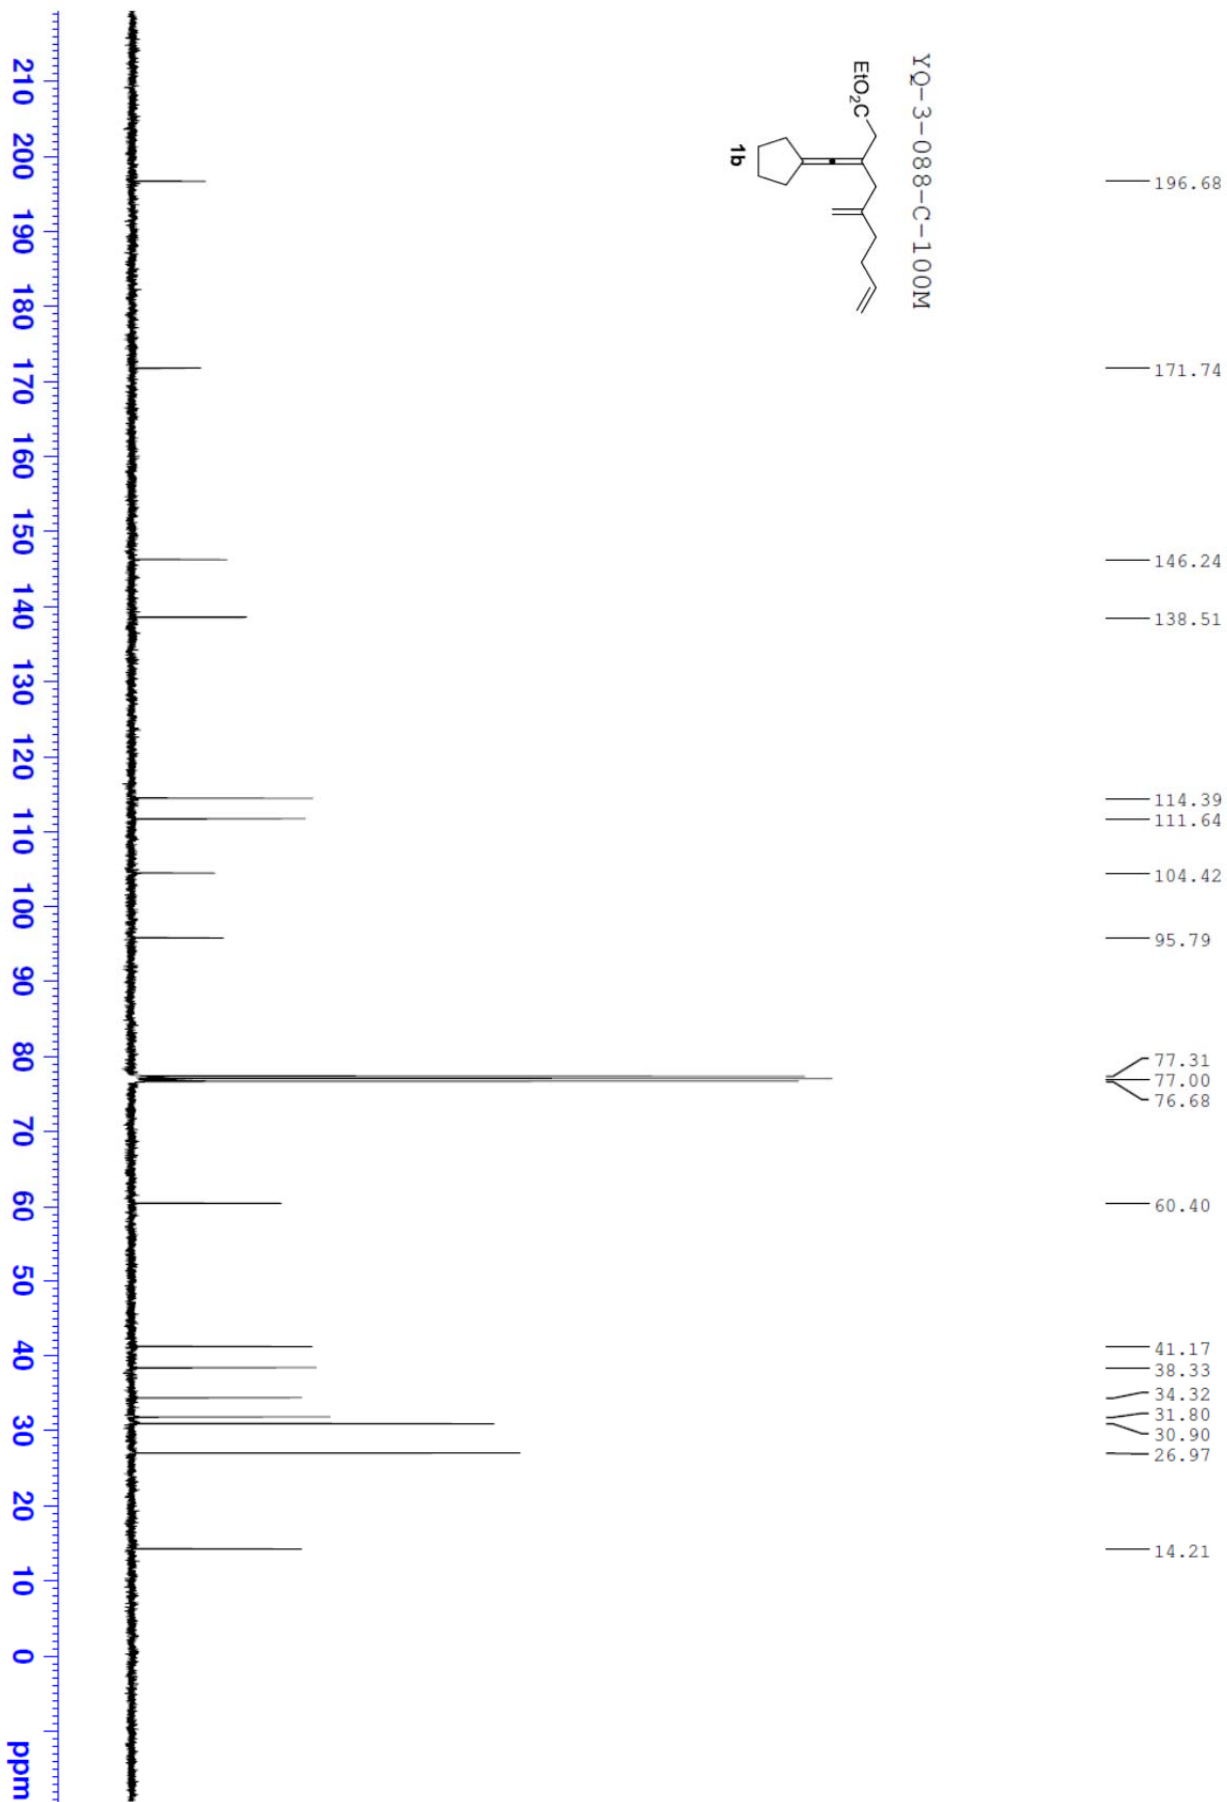

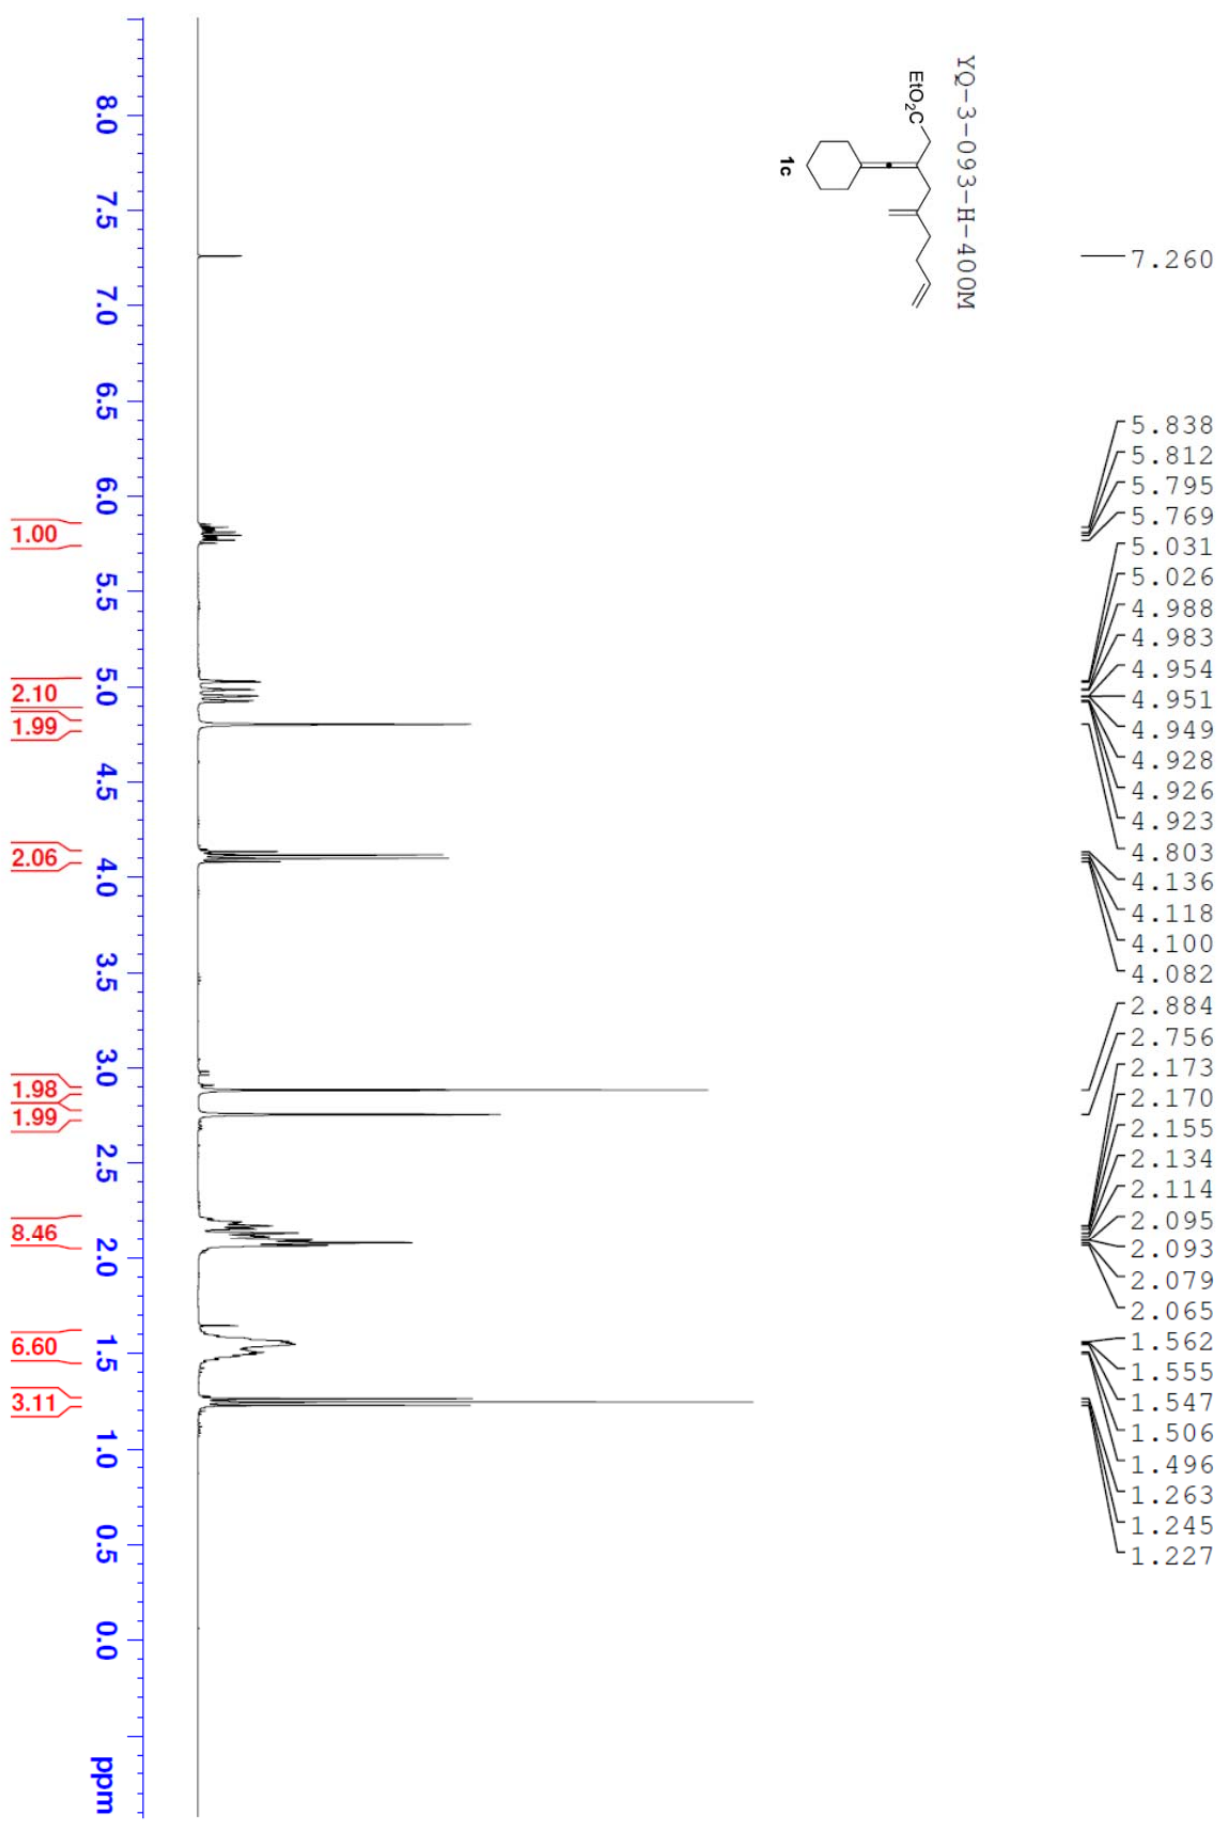



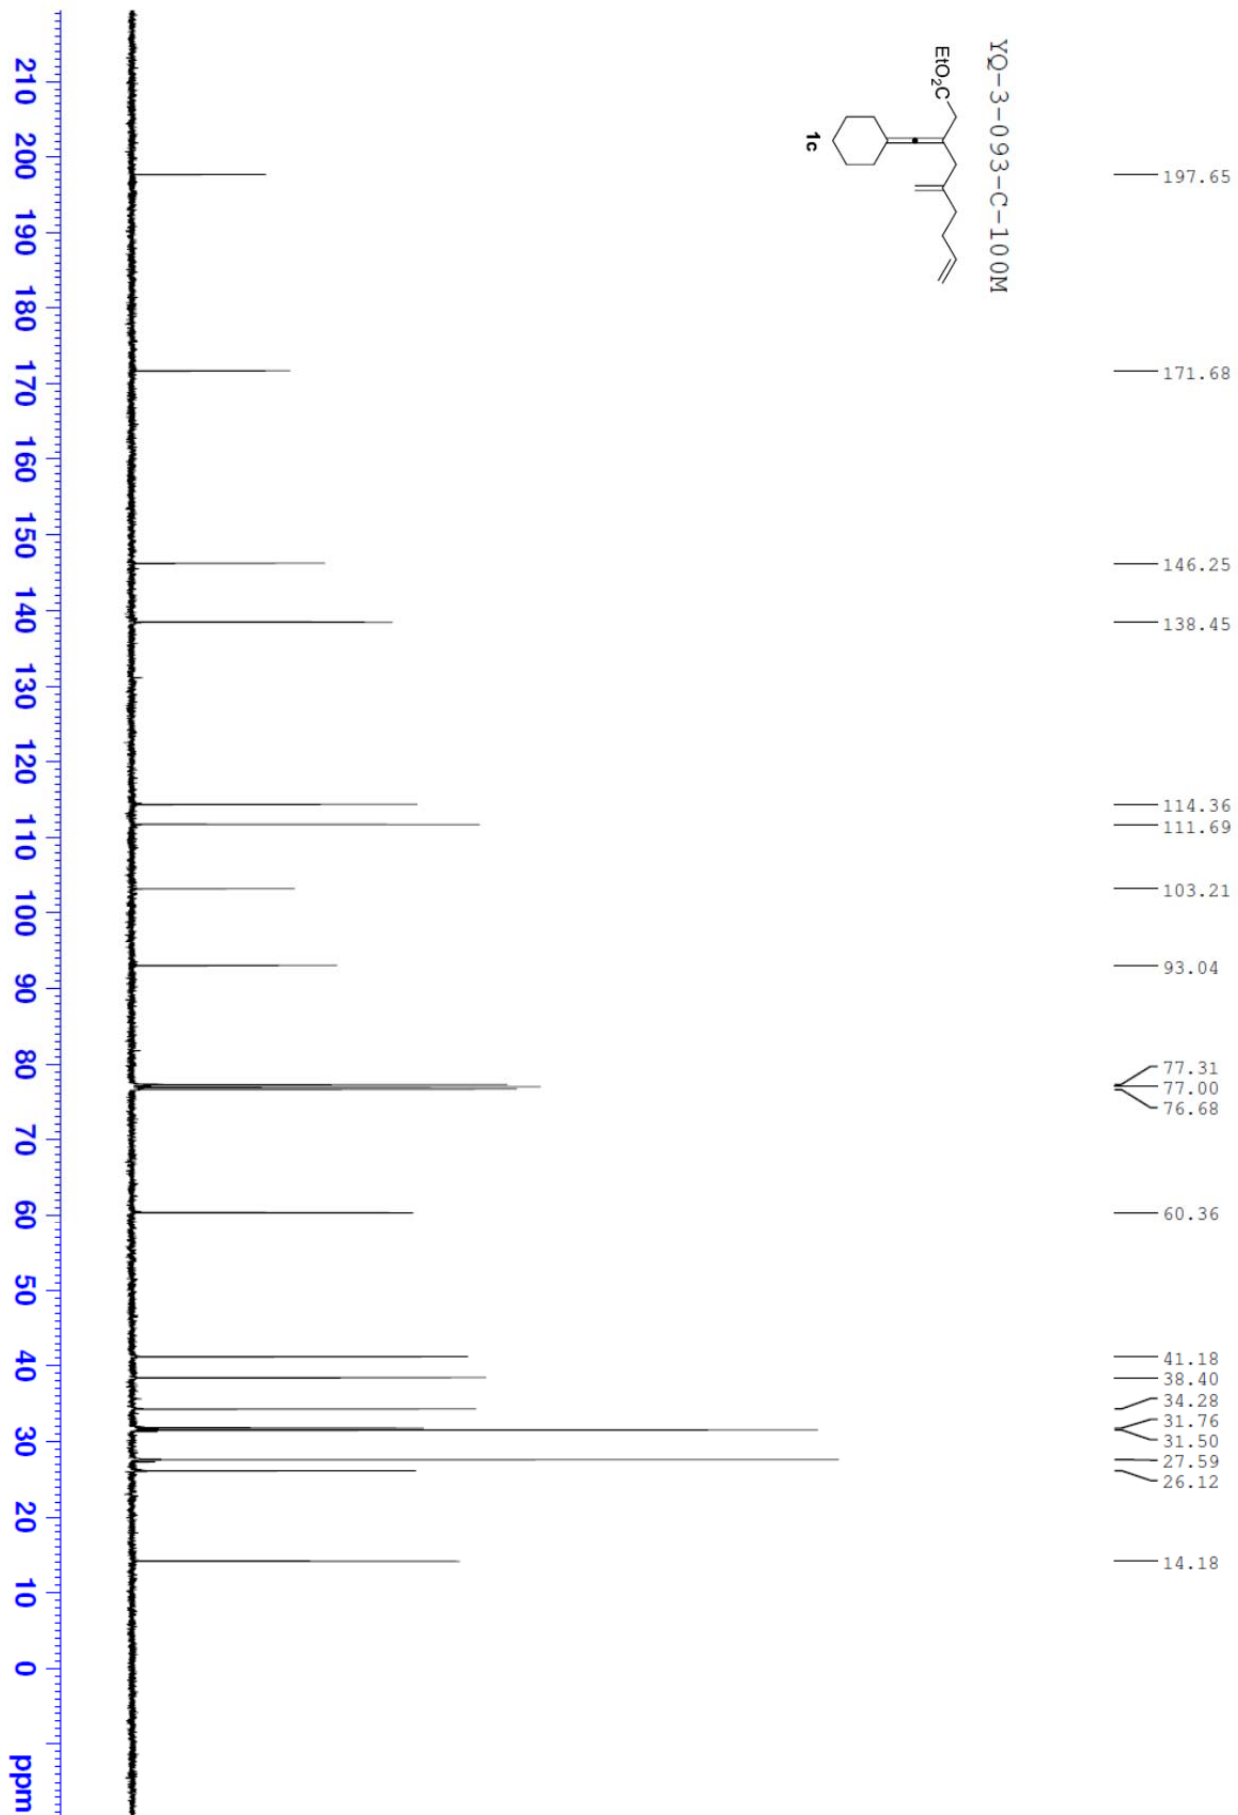

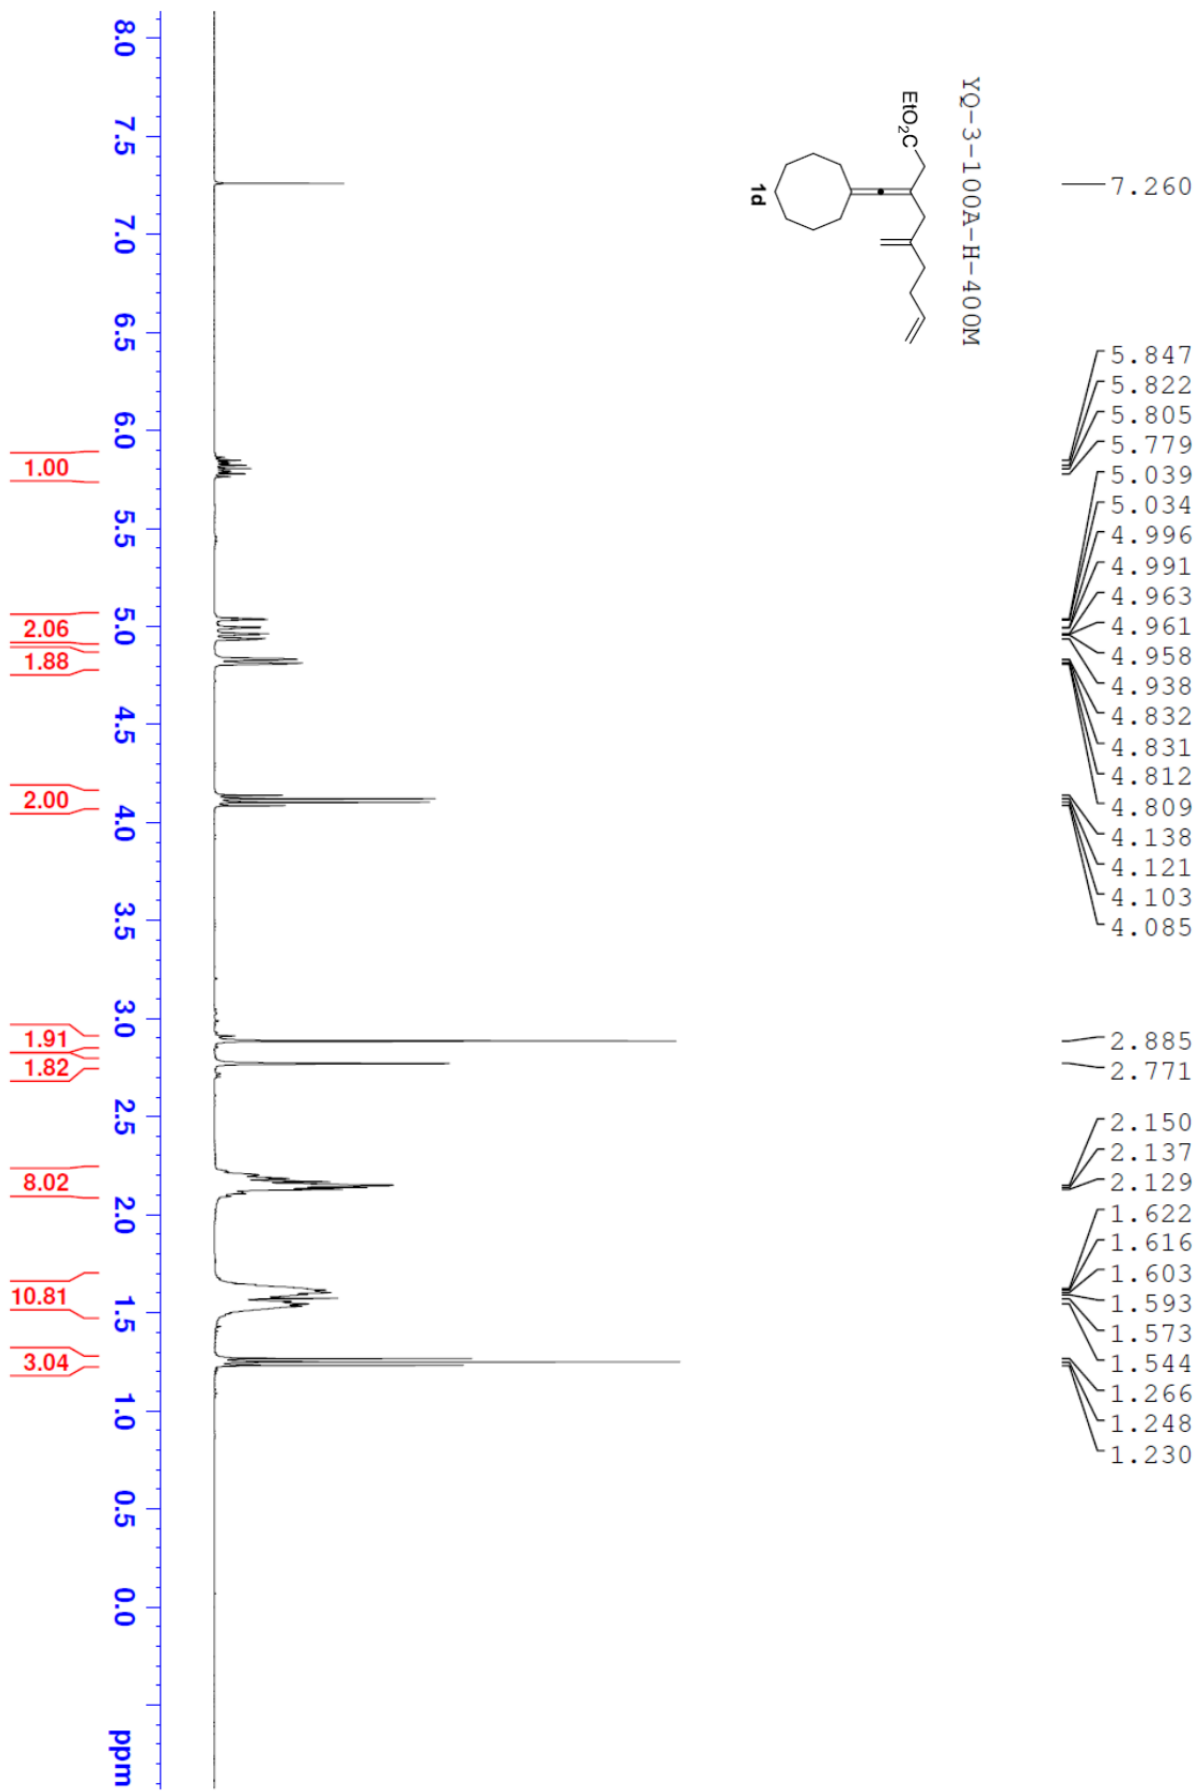

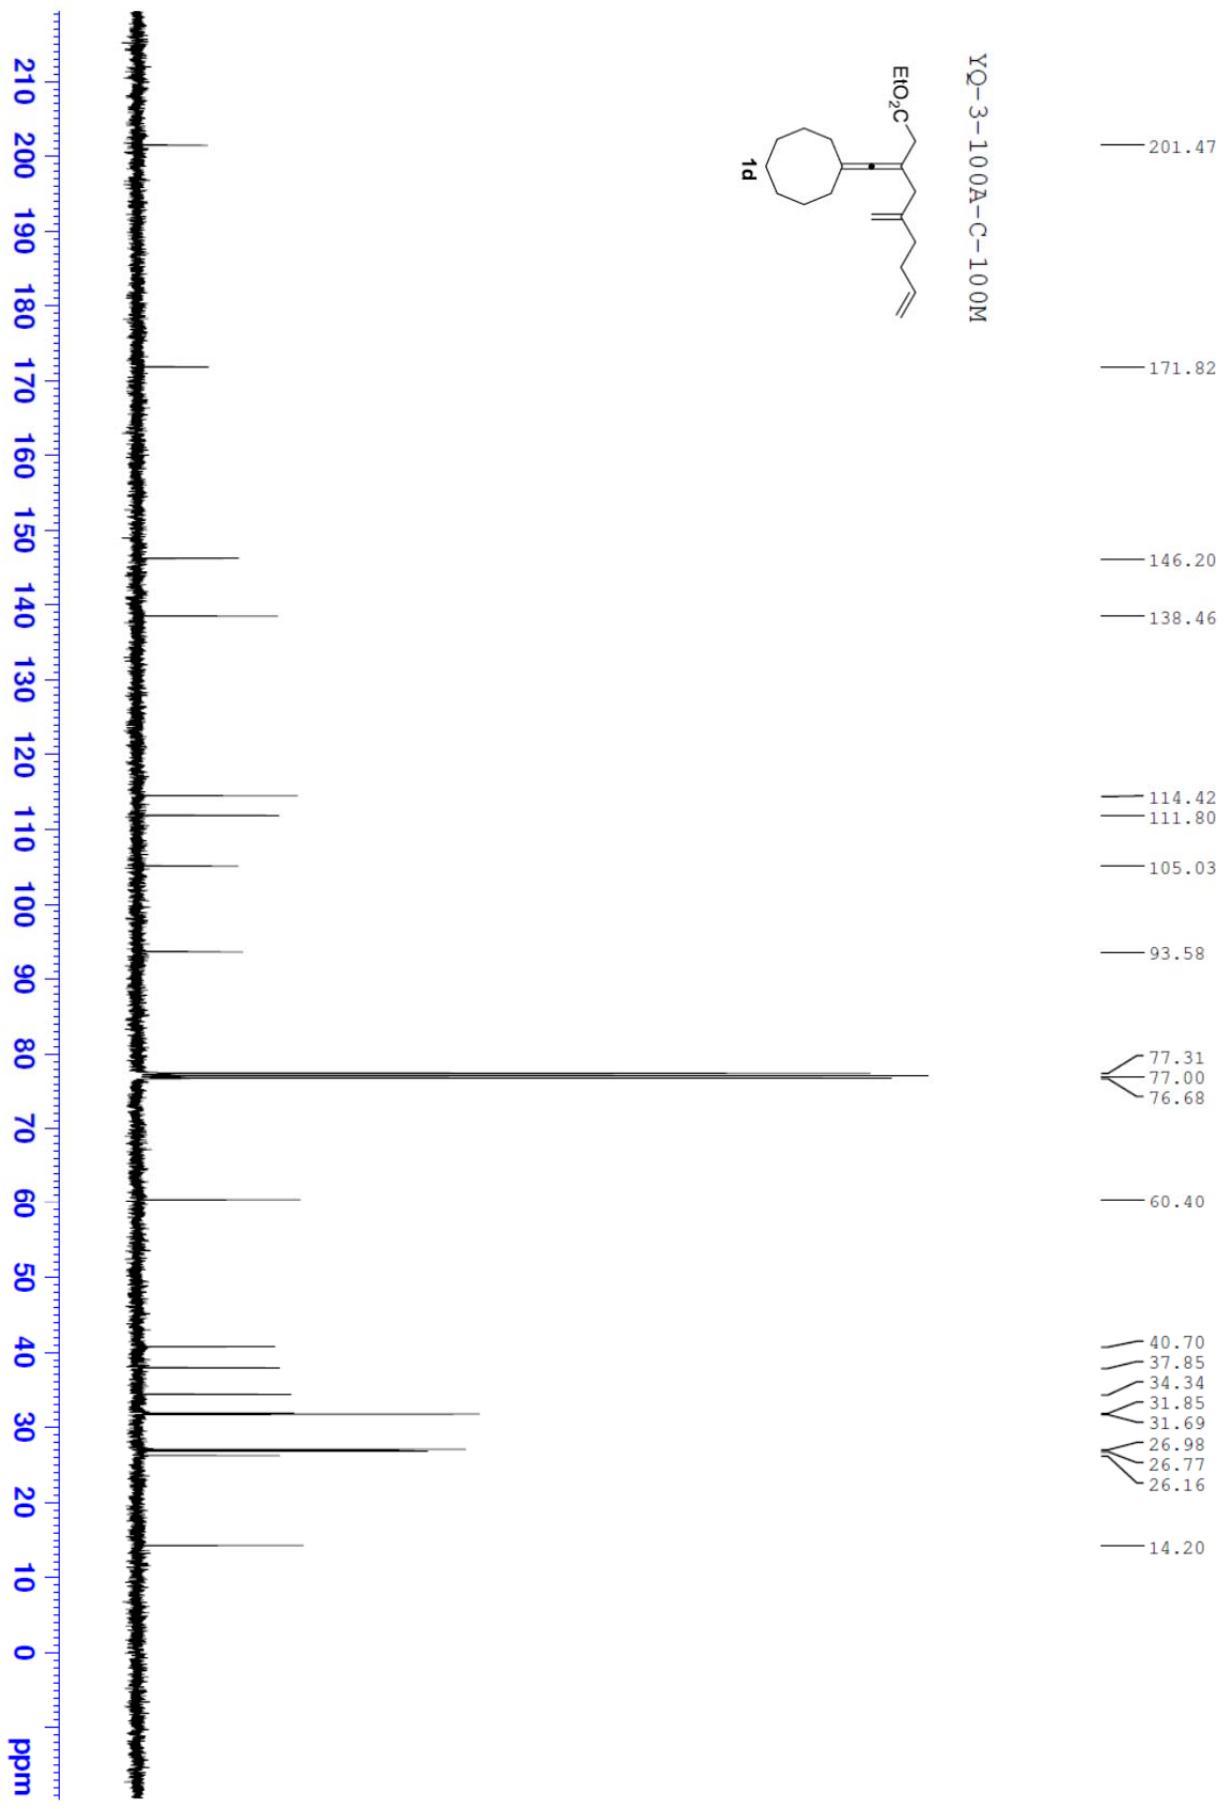

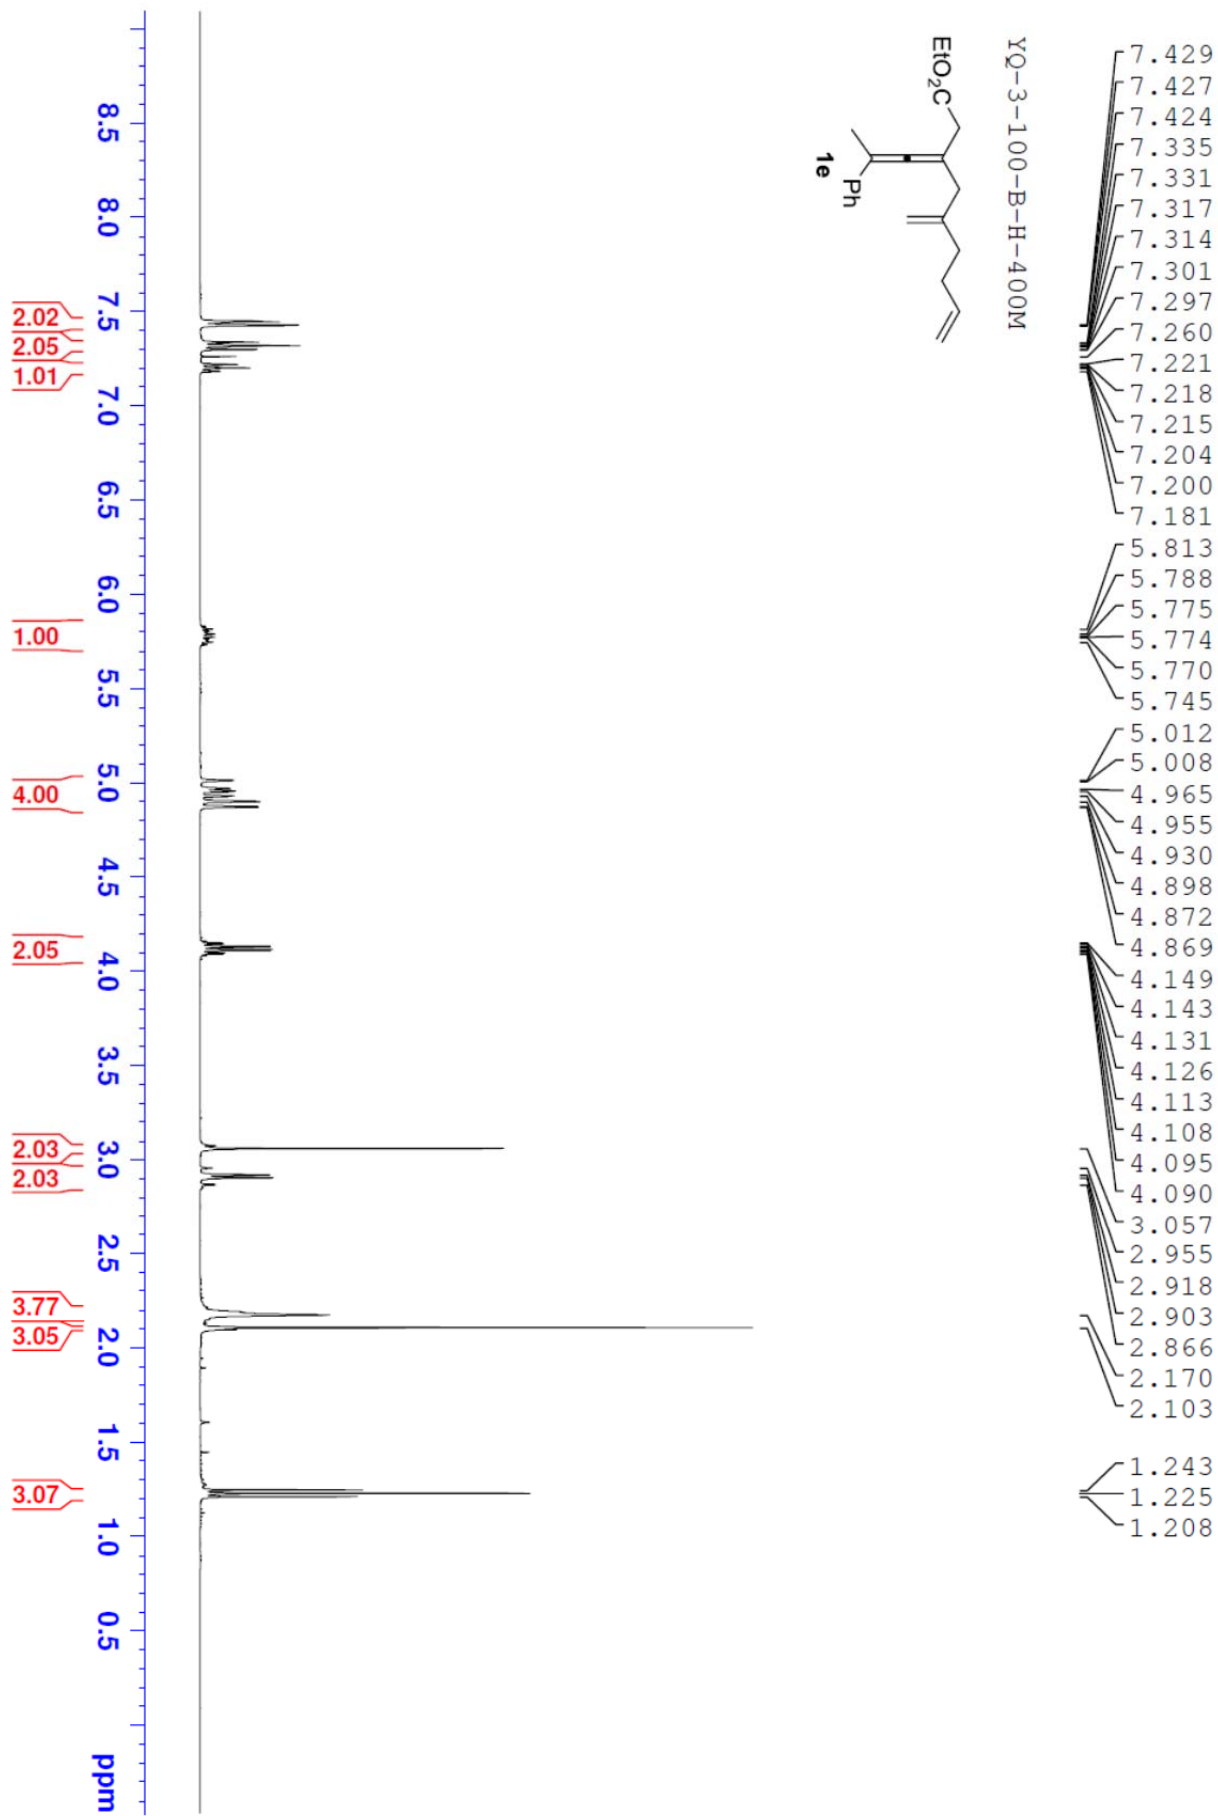

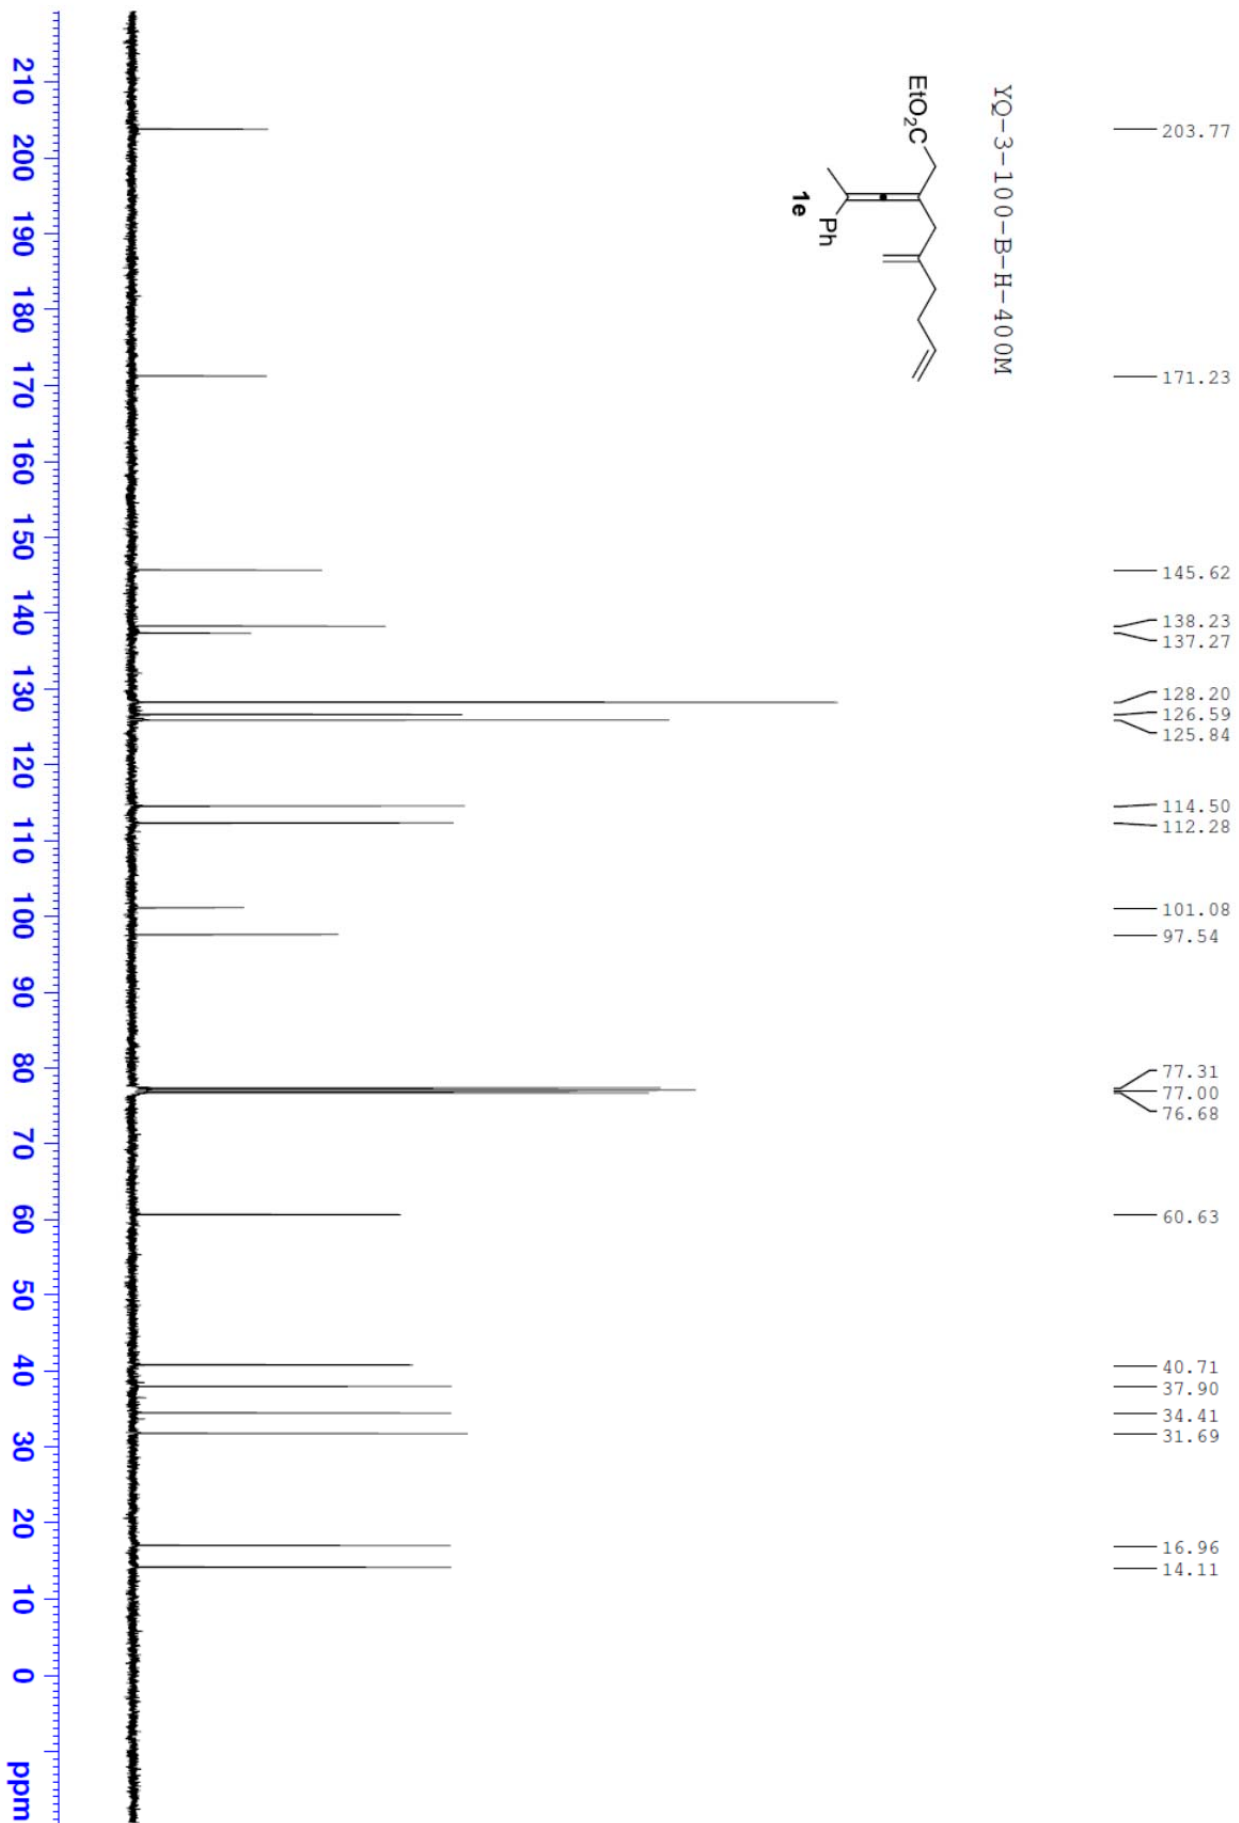

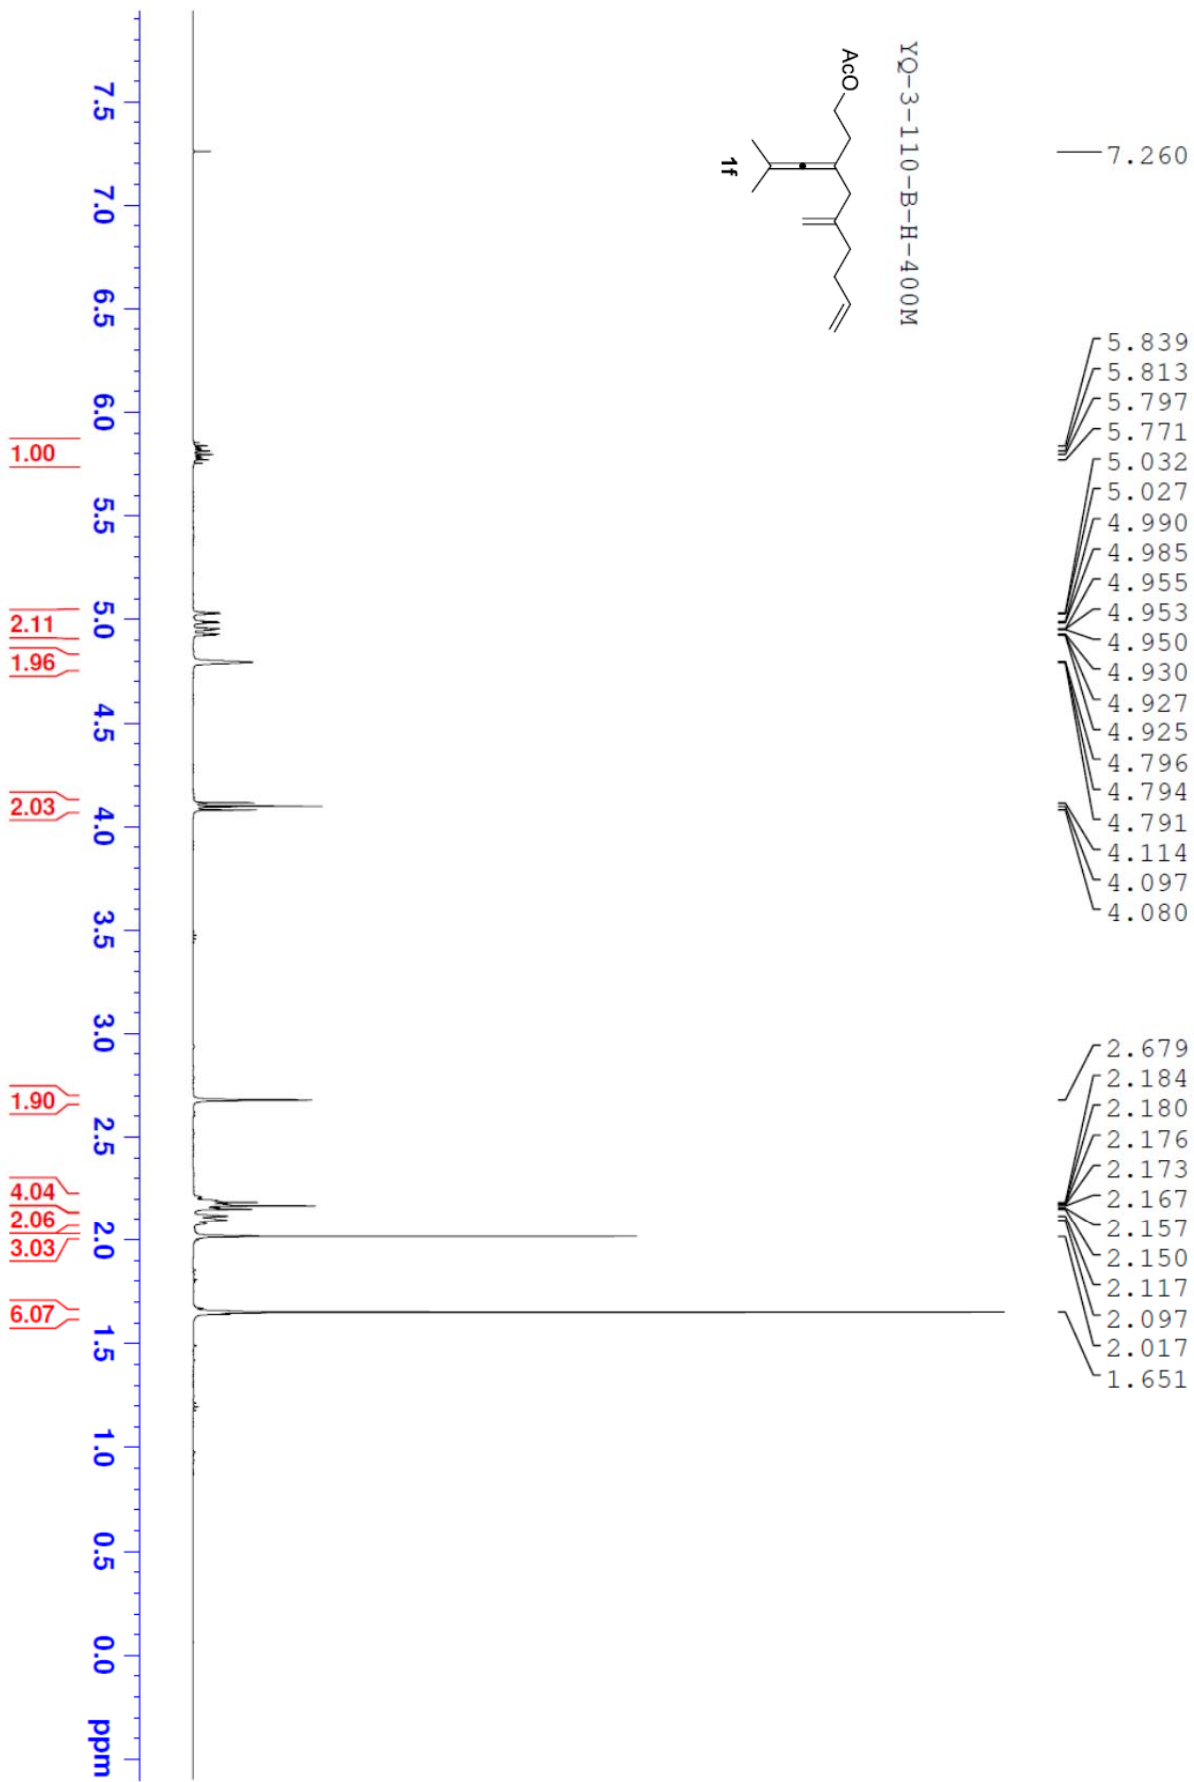

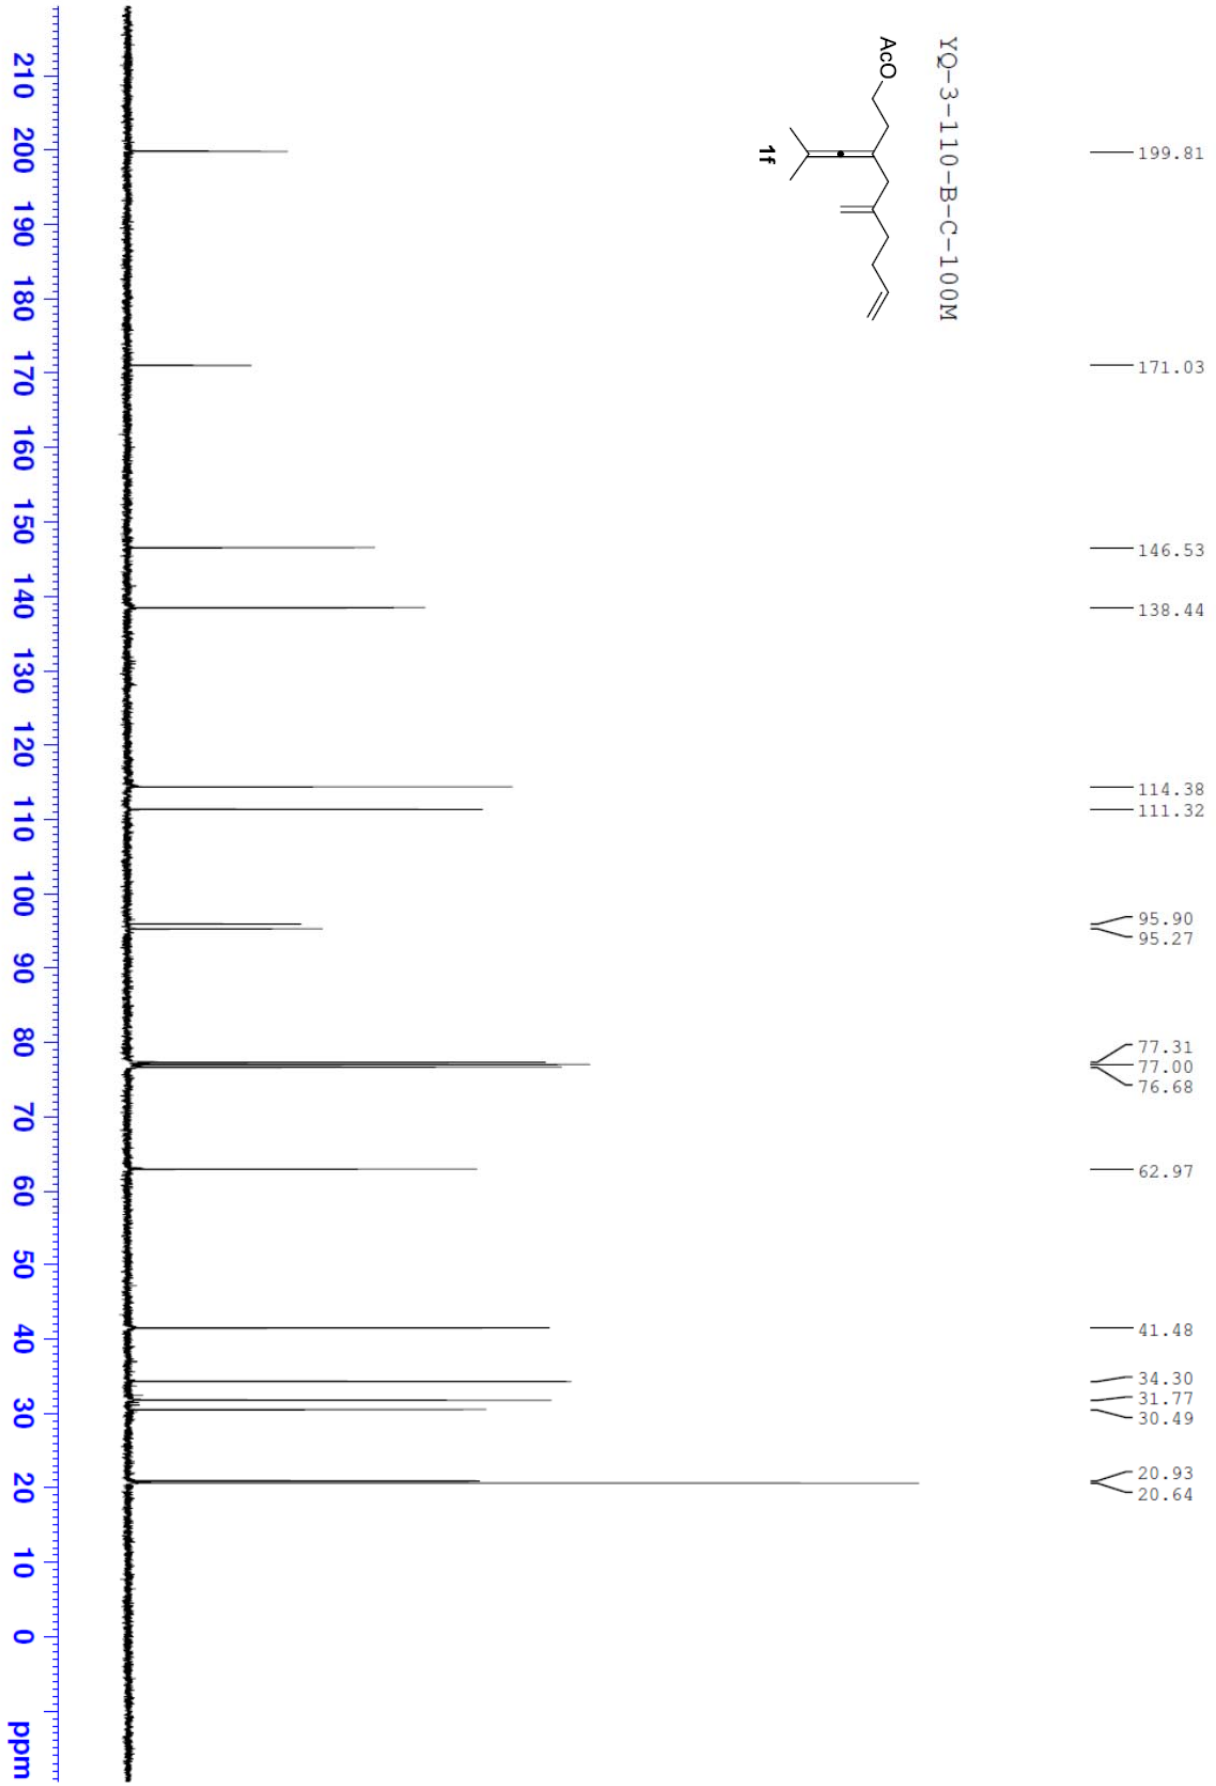

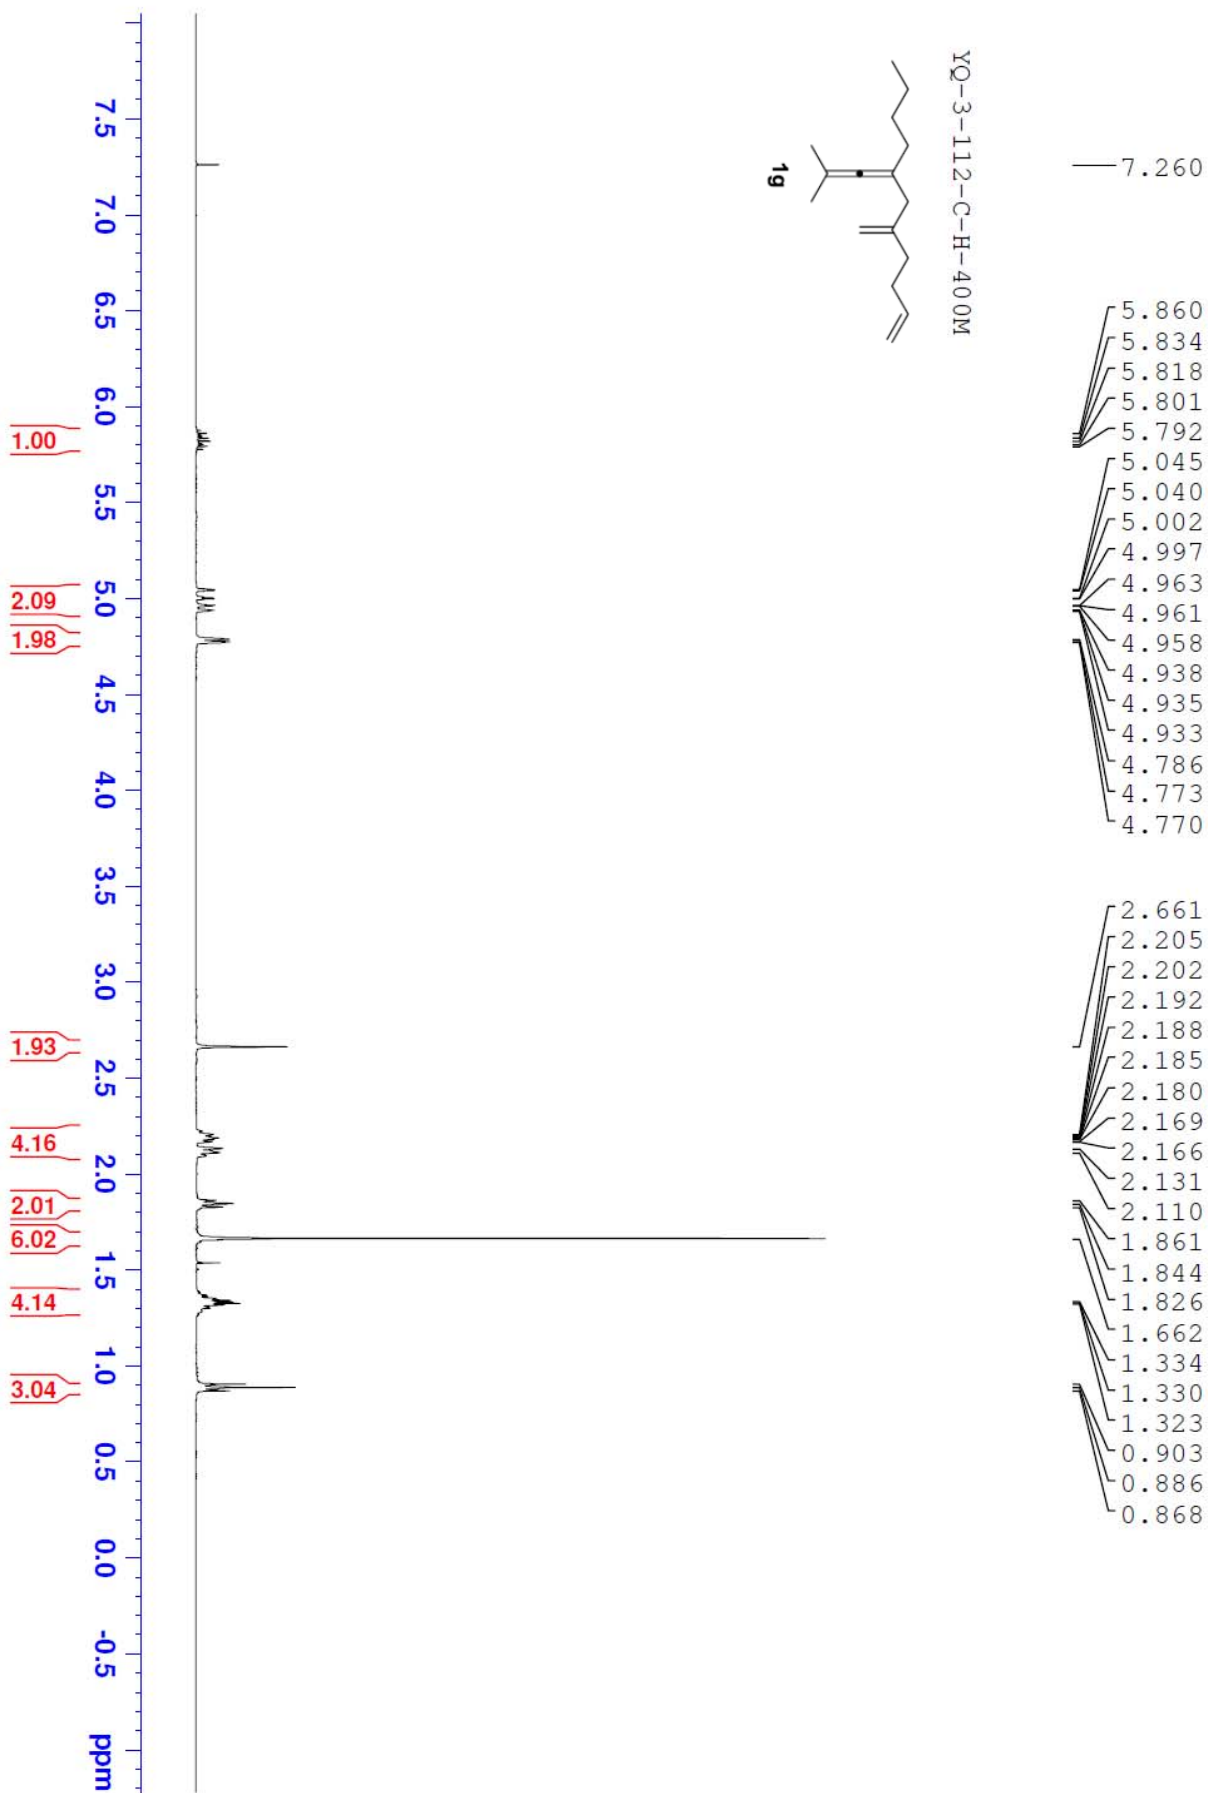



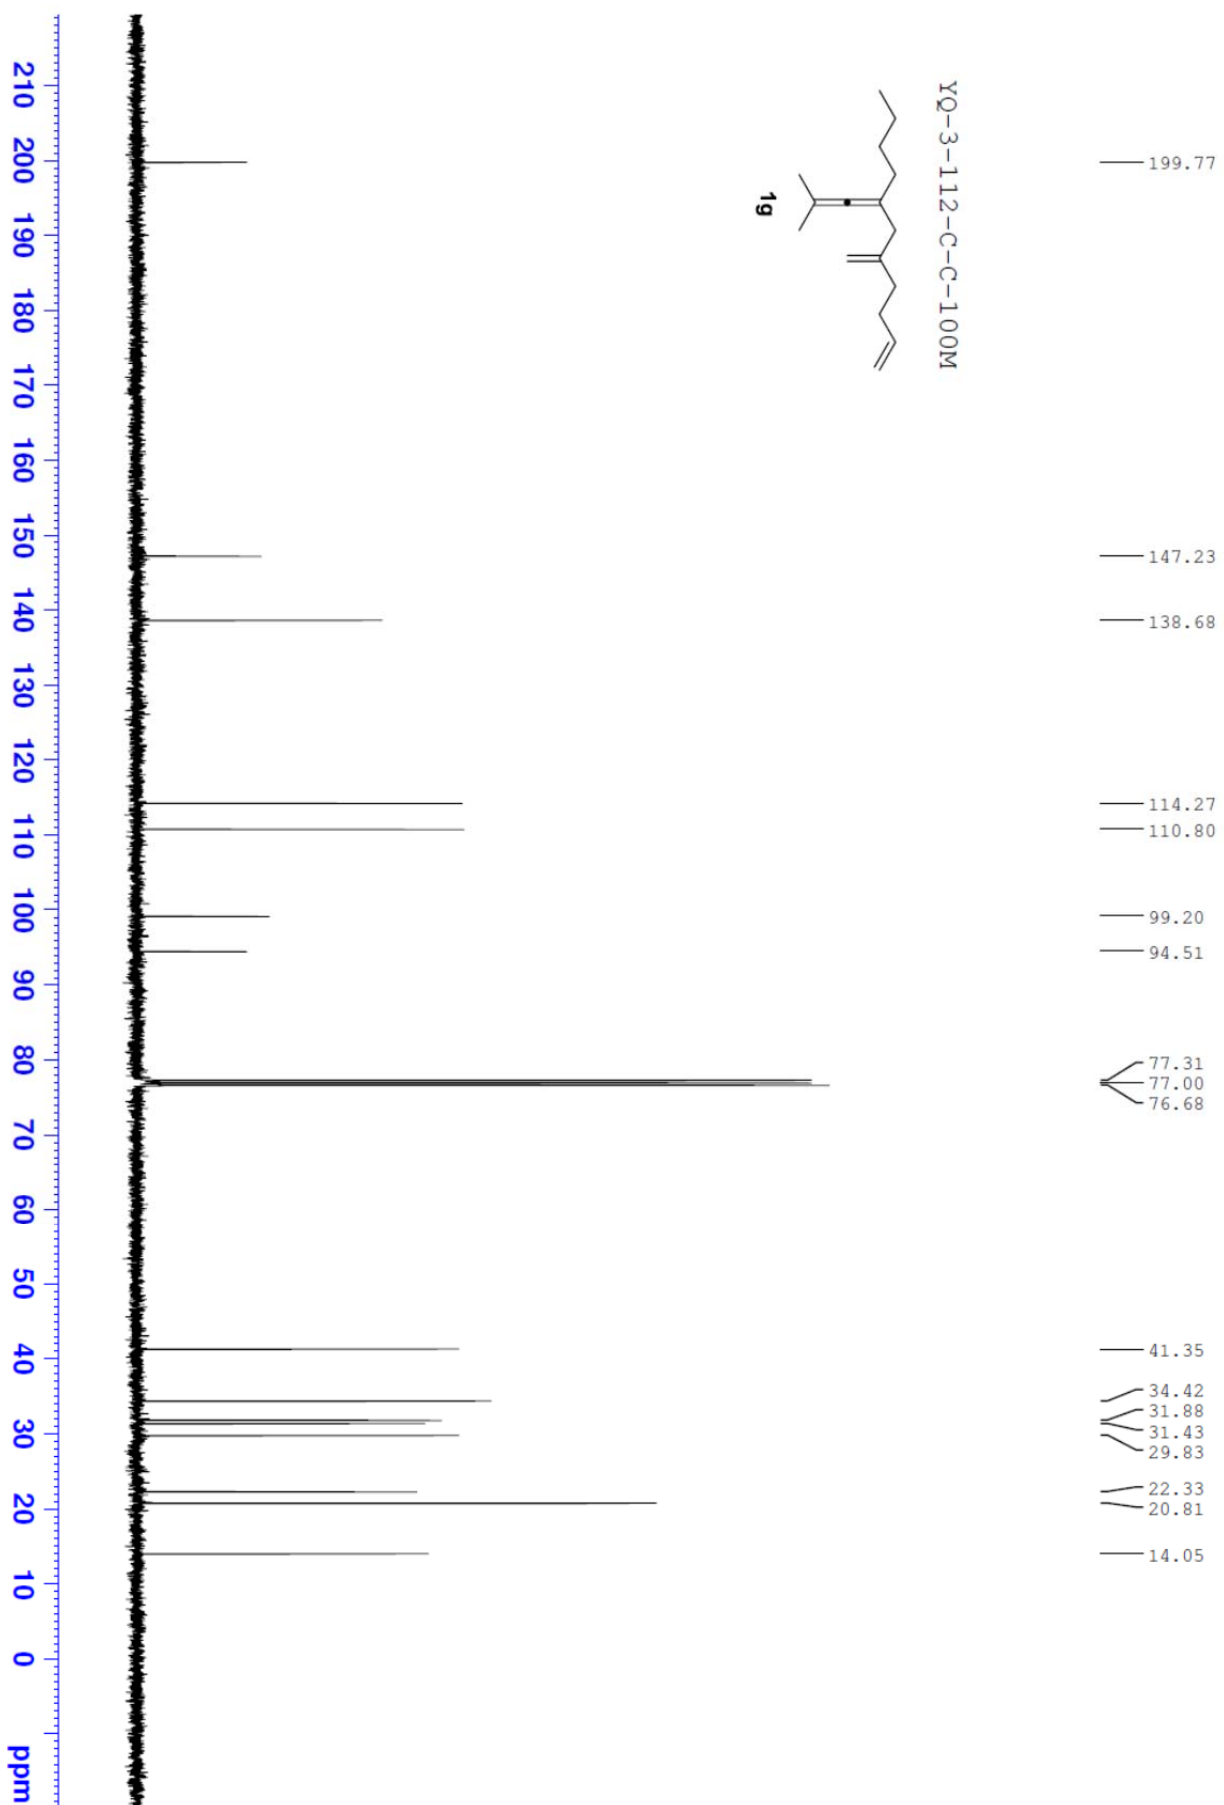

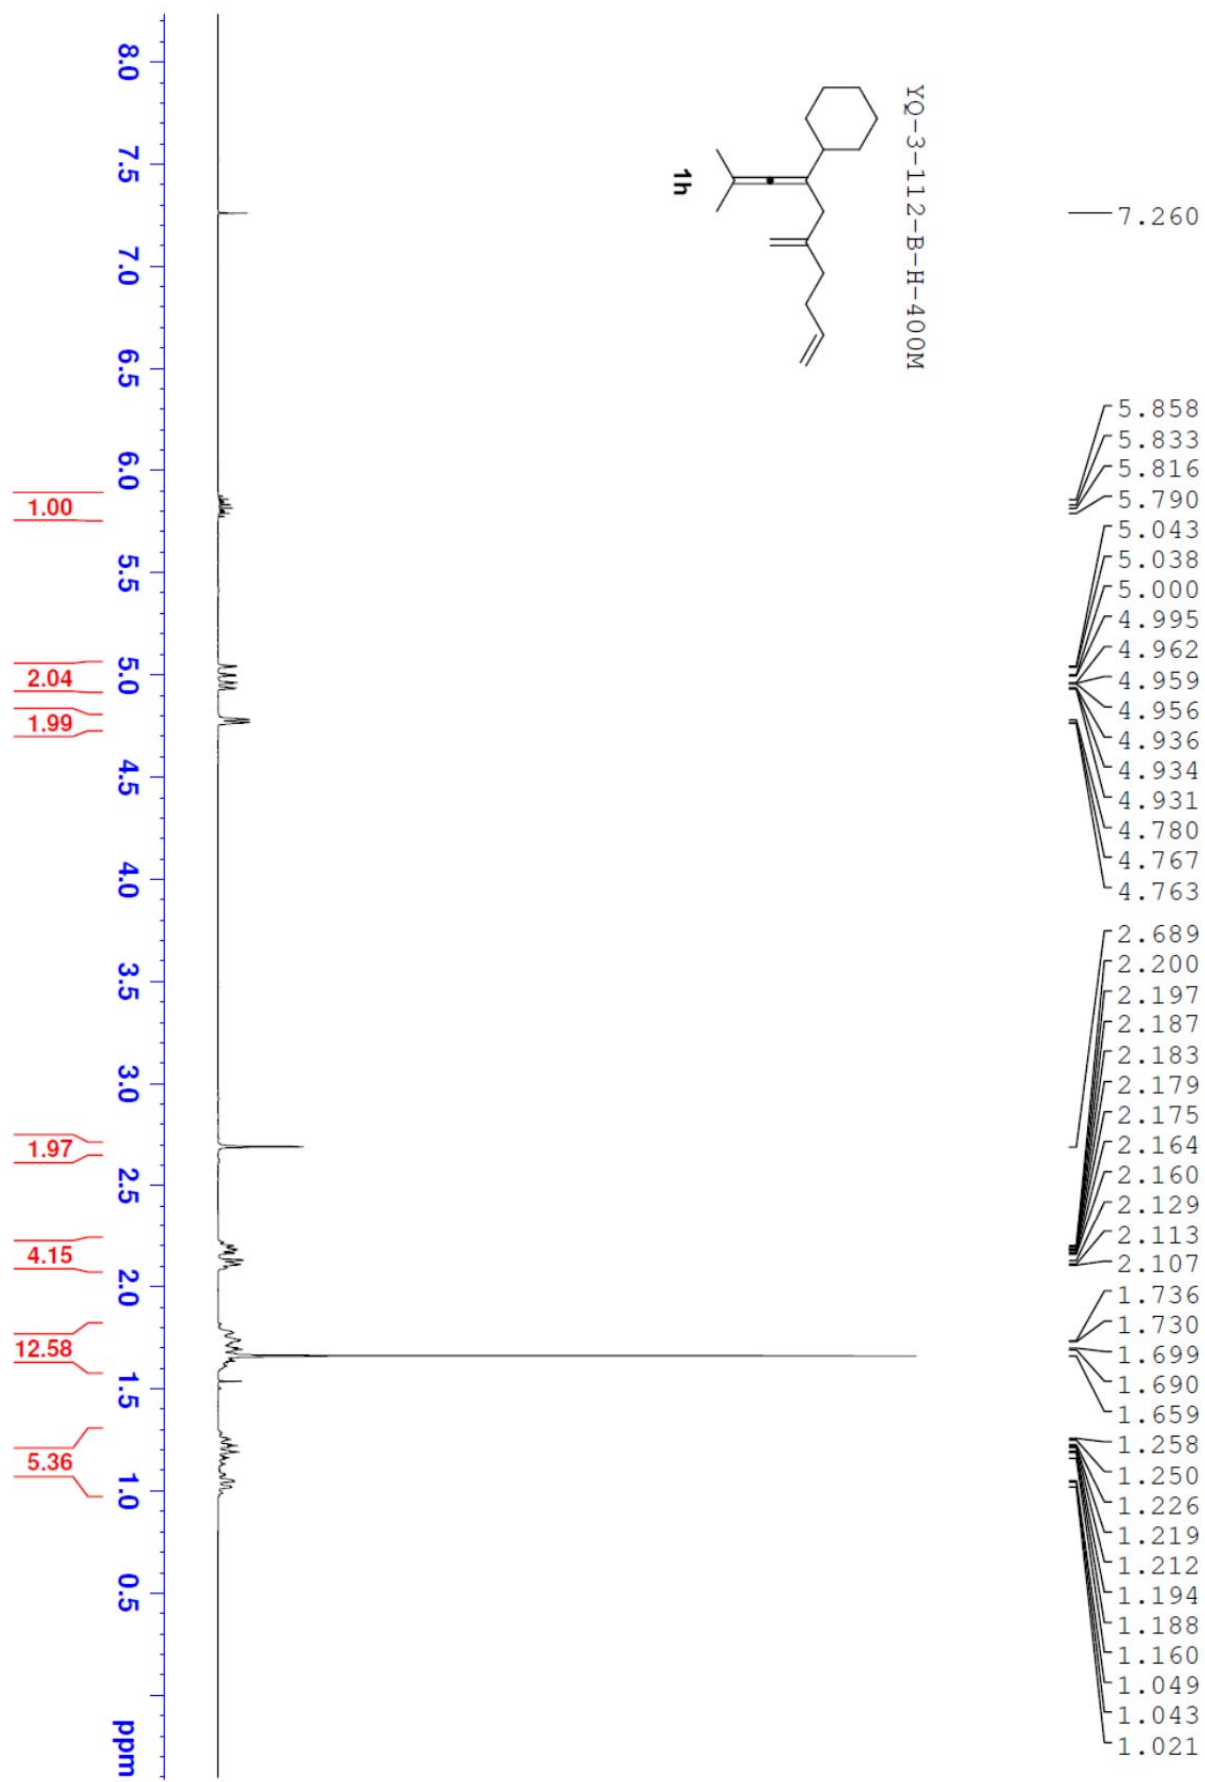

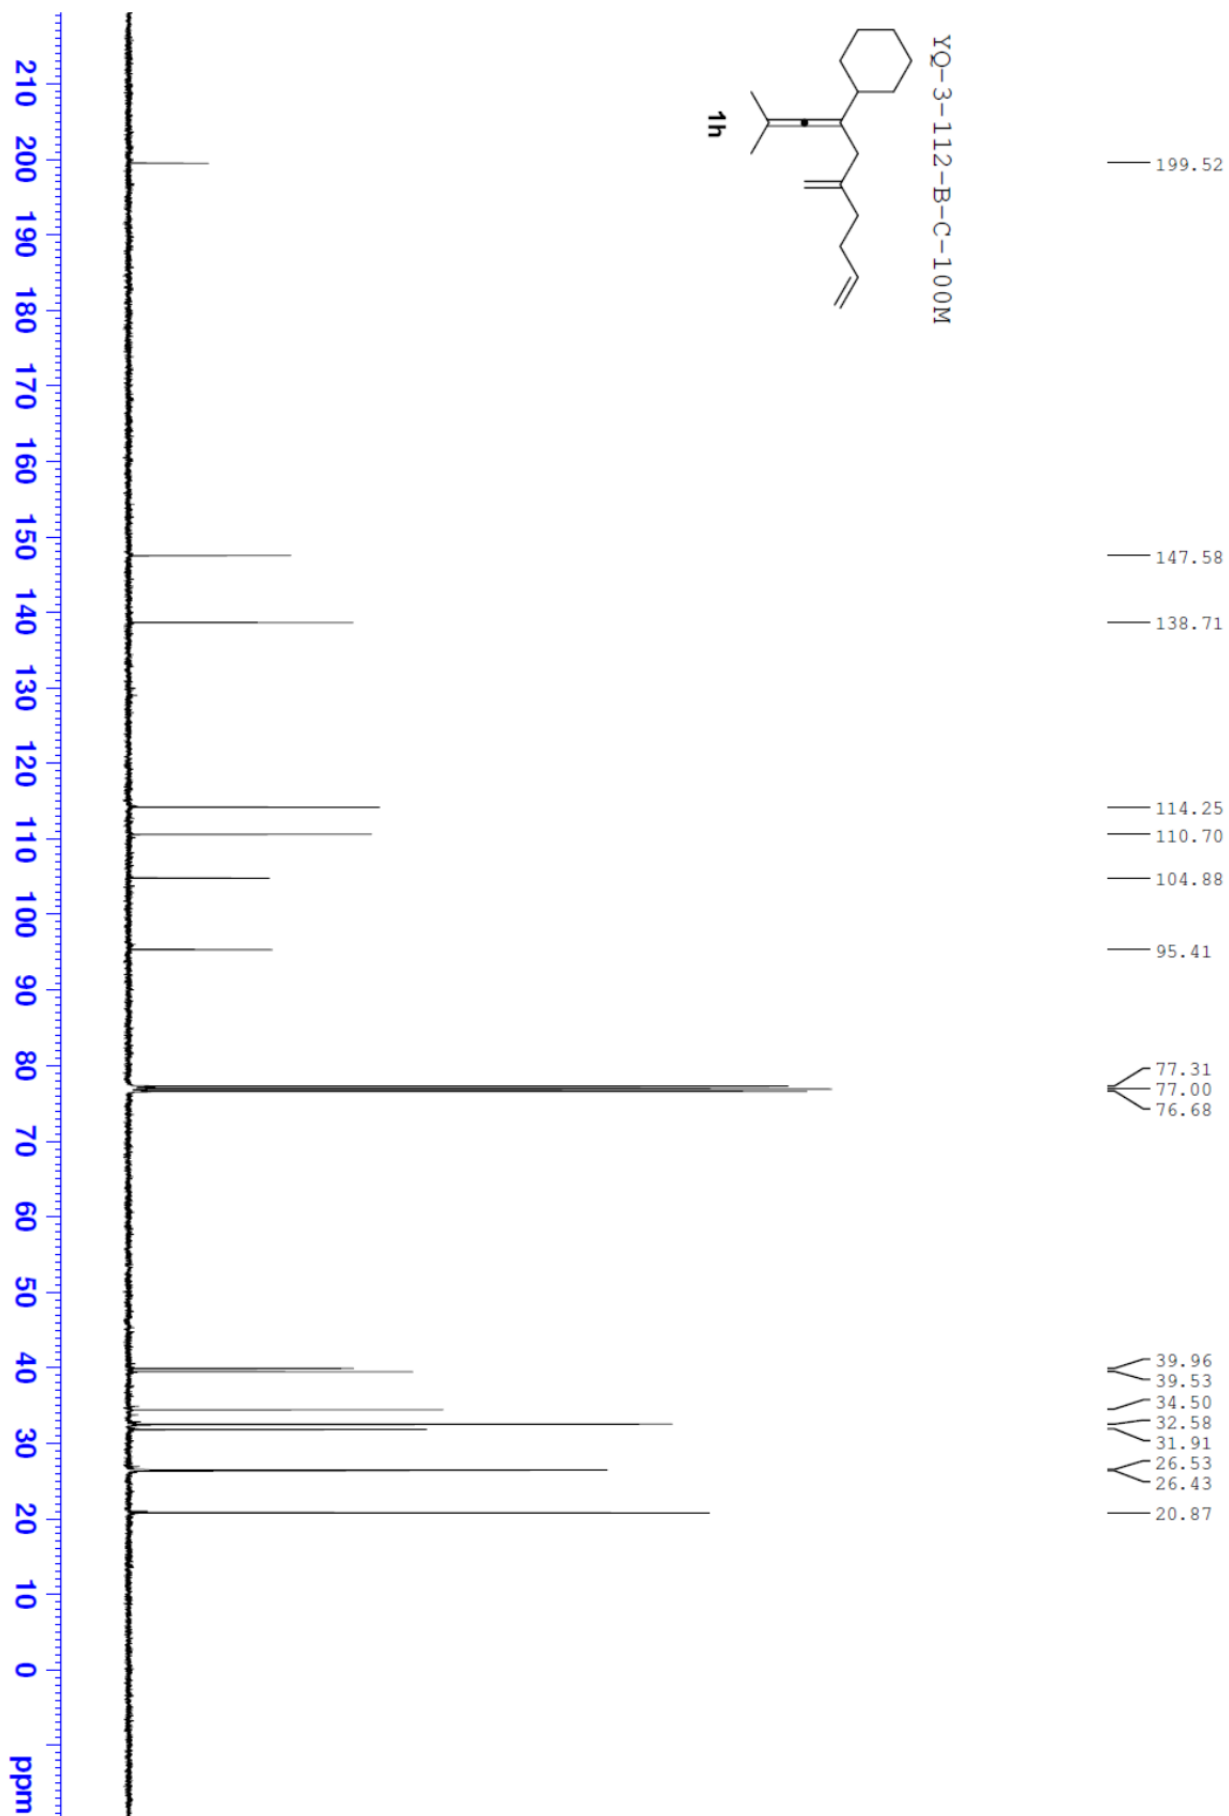

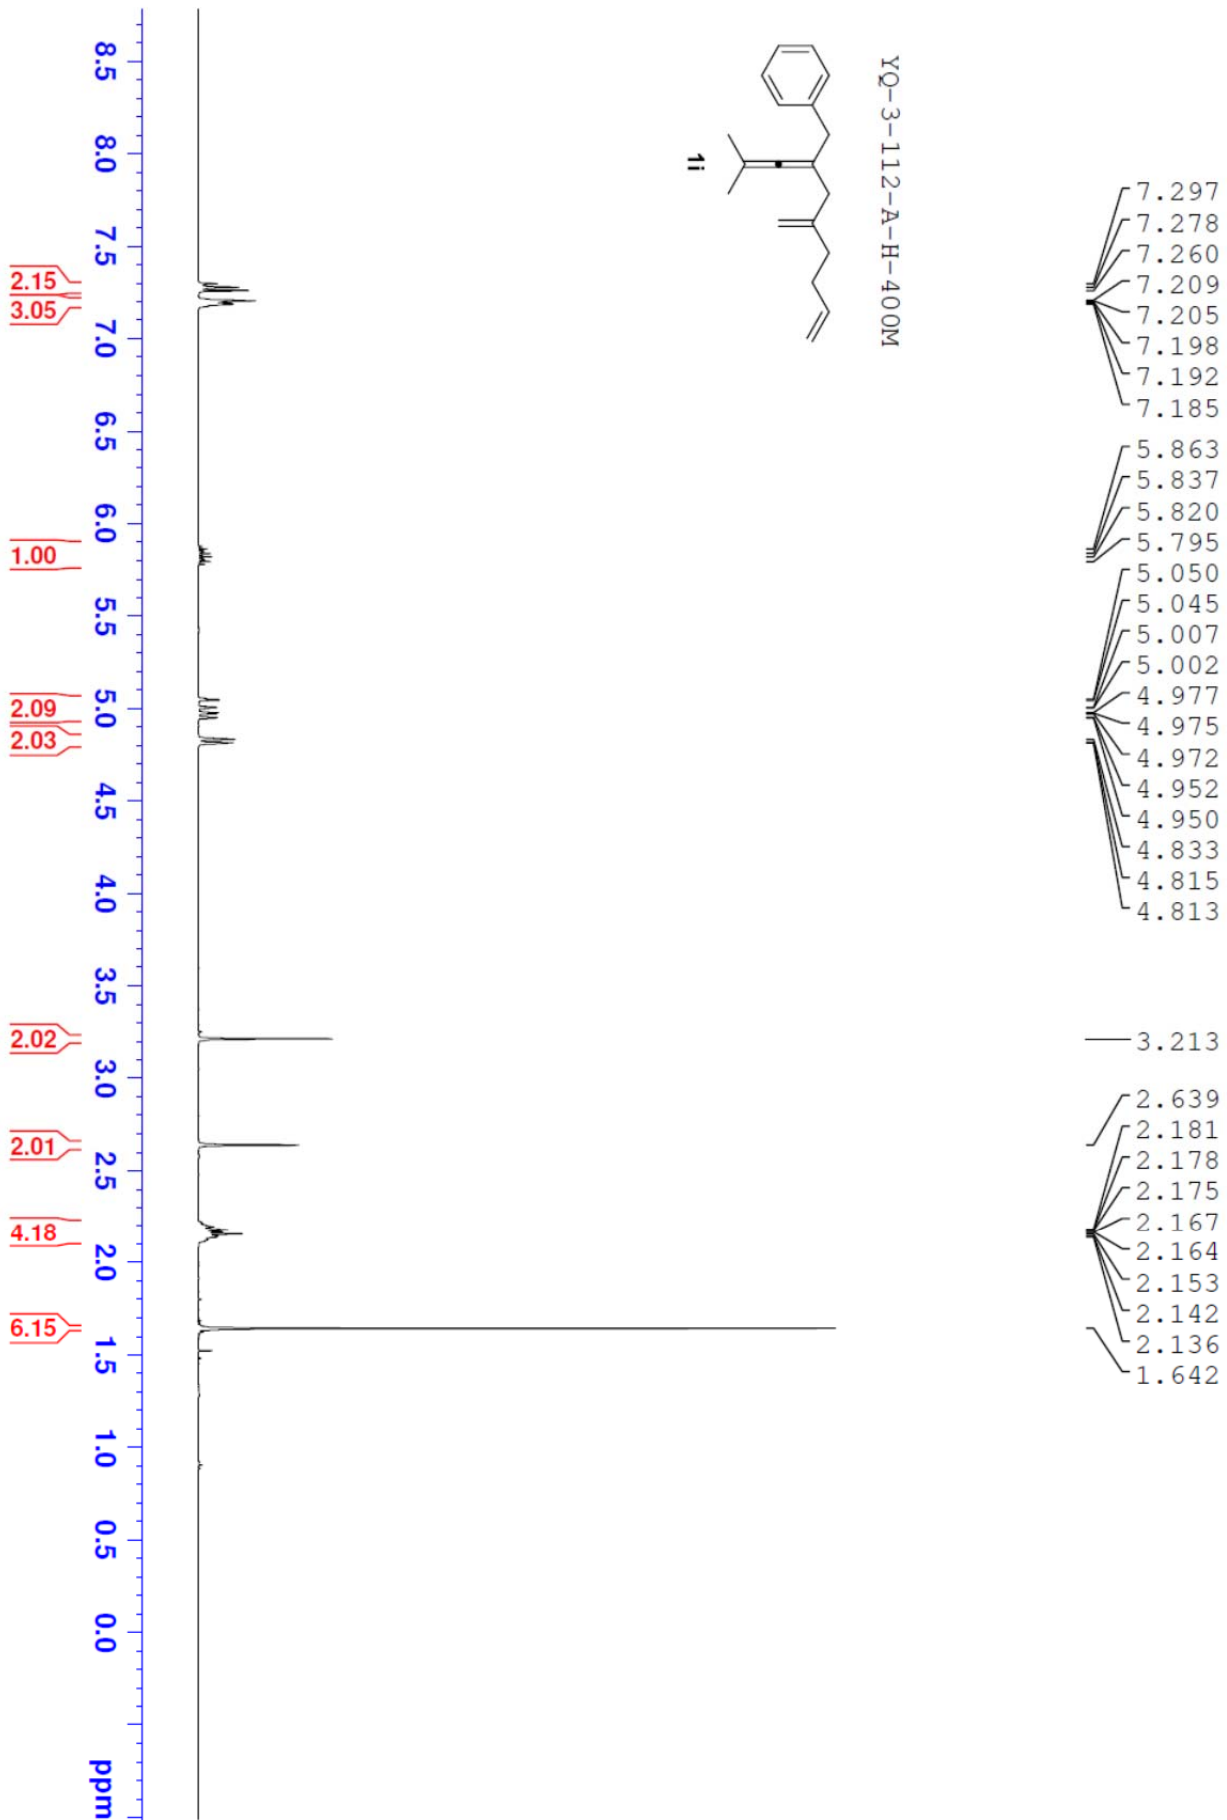

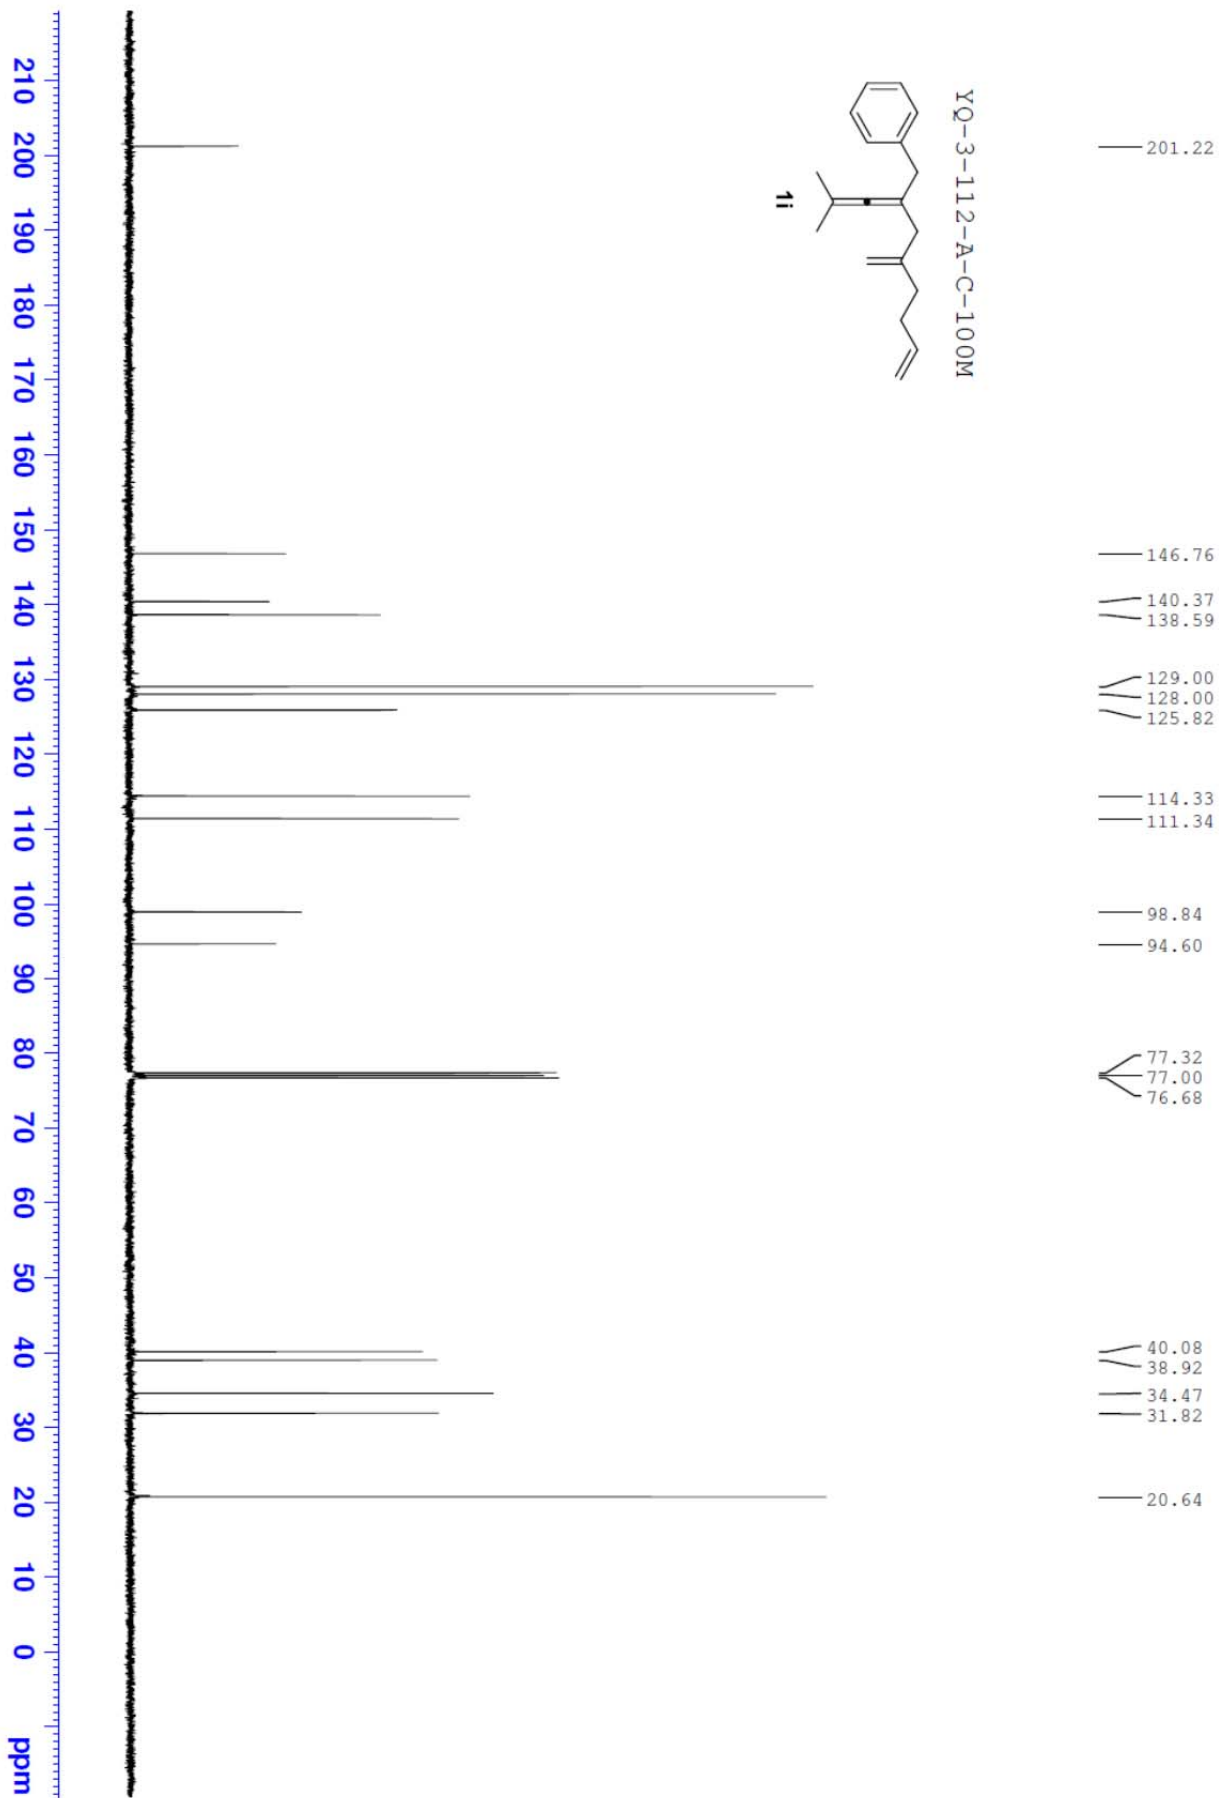

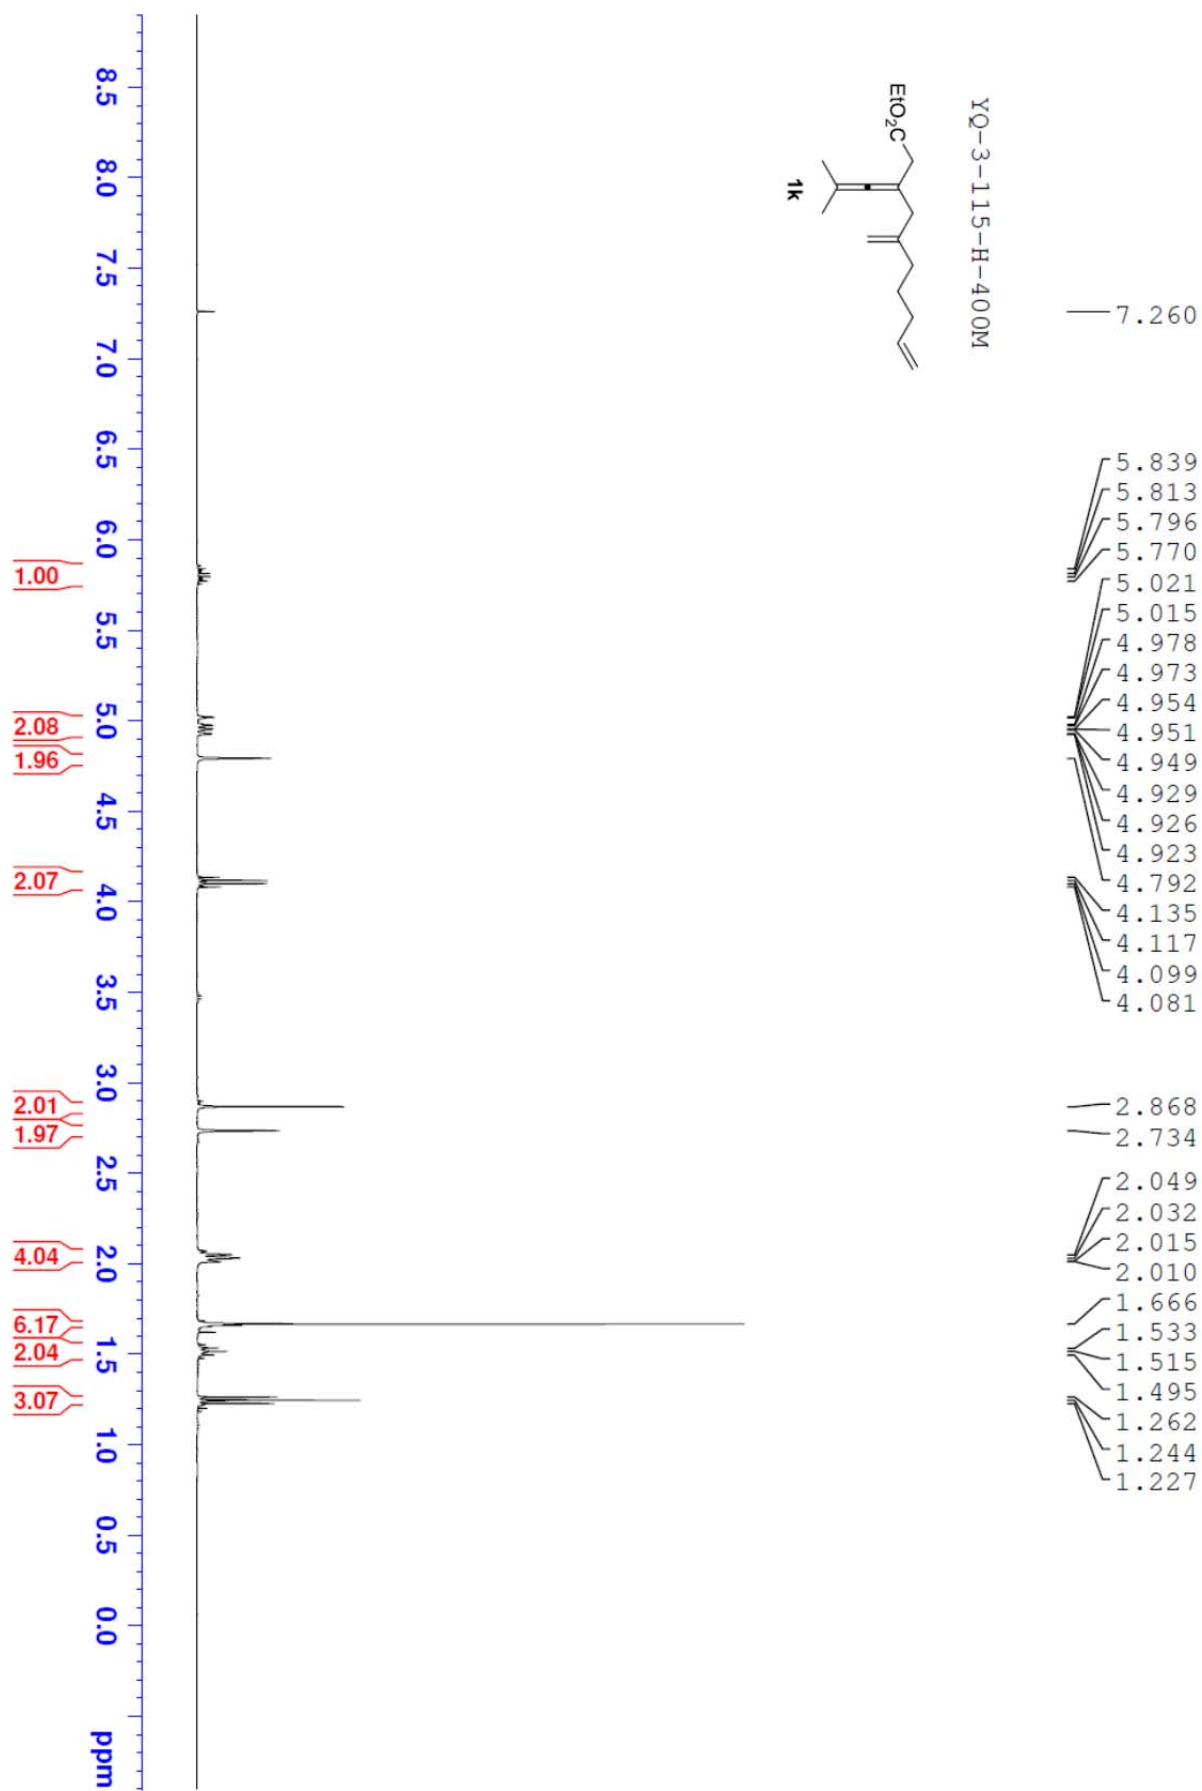

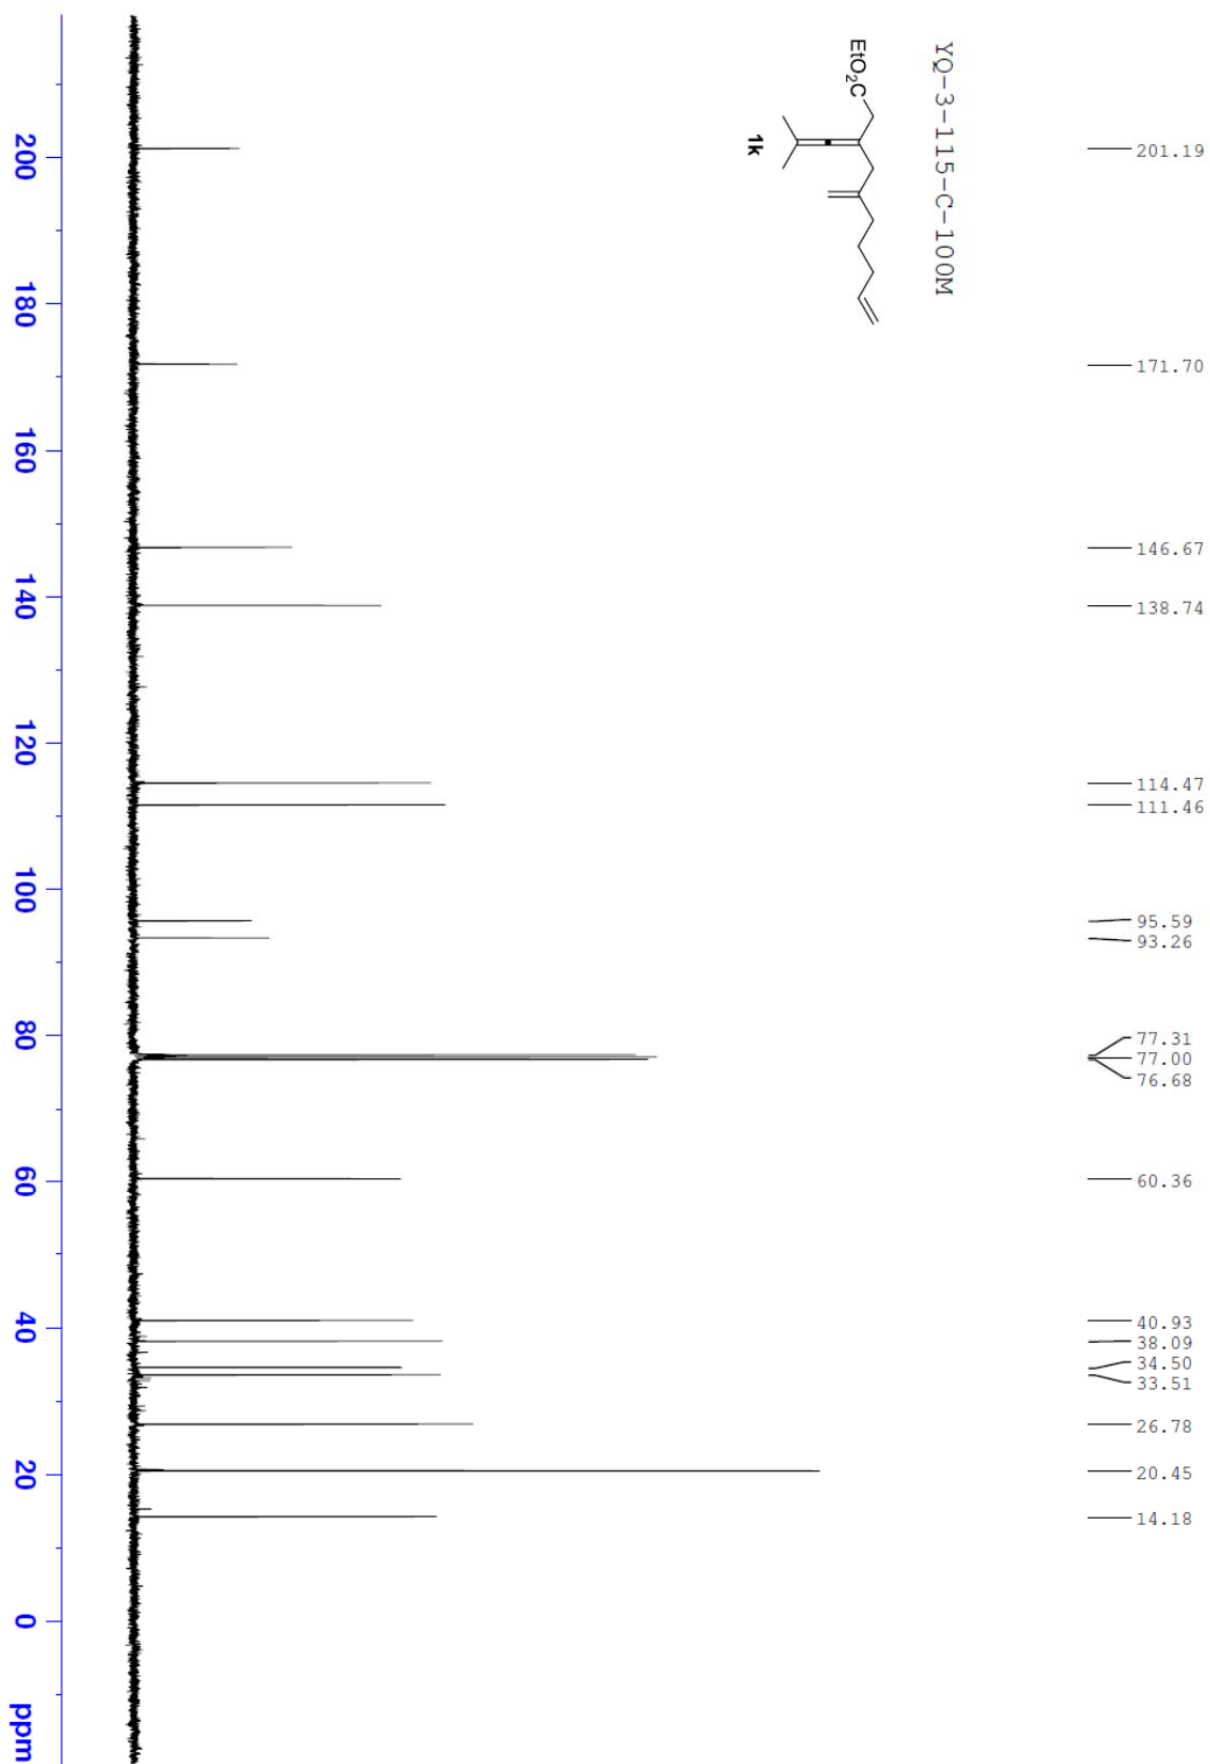

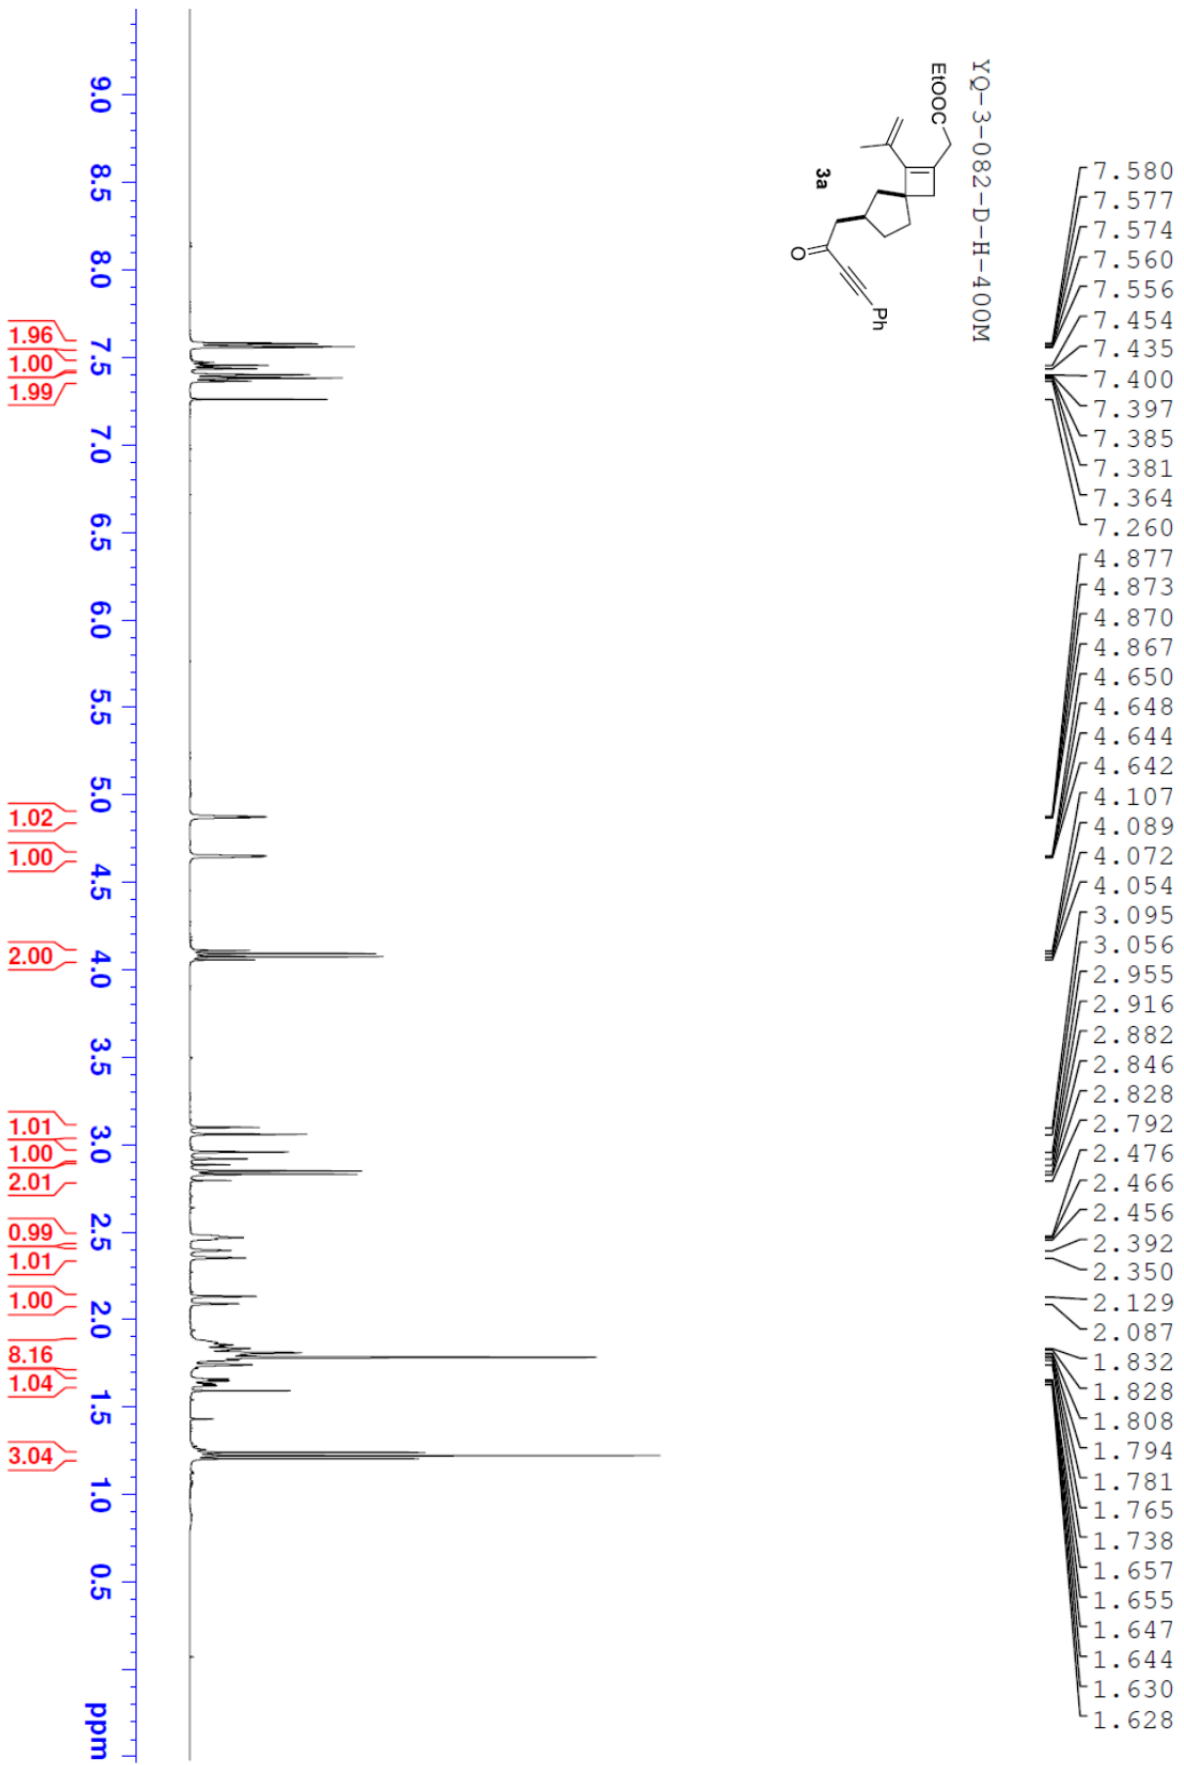



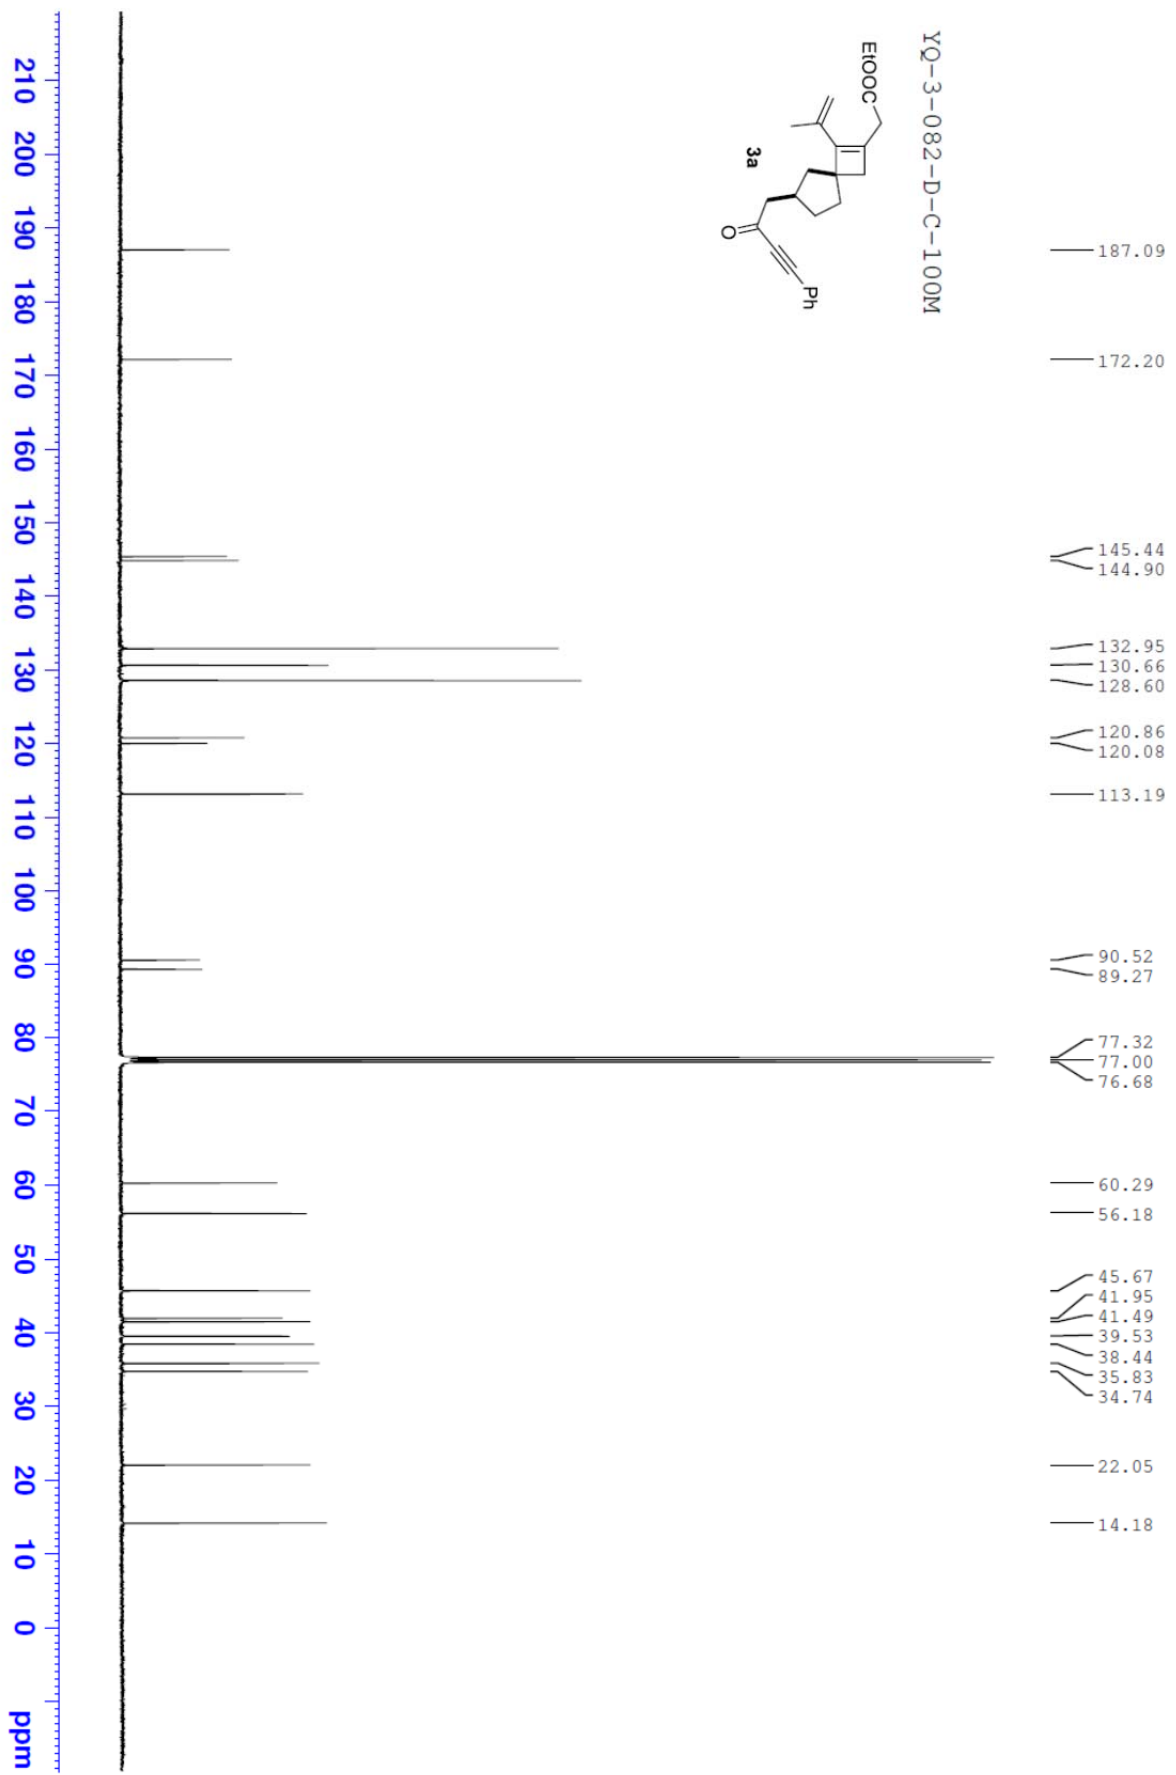

YQ-3-082-D-NOE

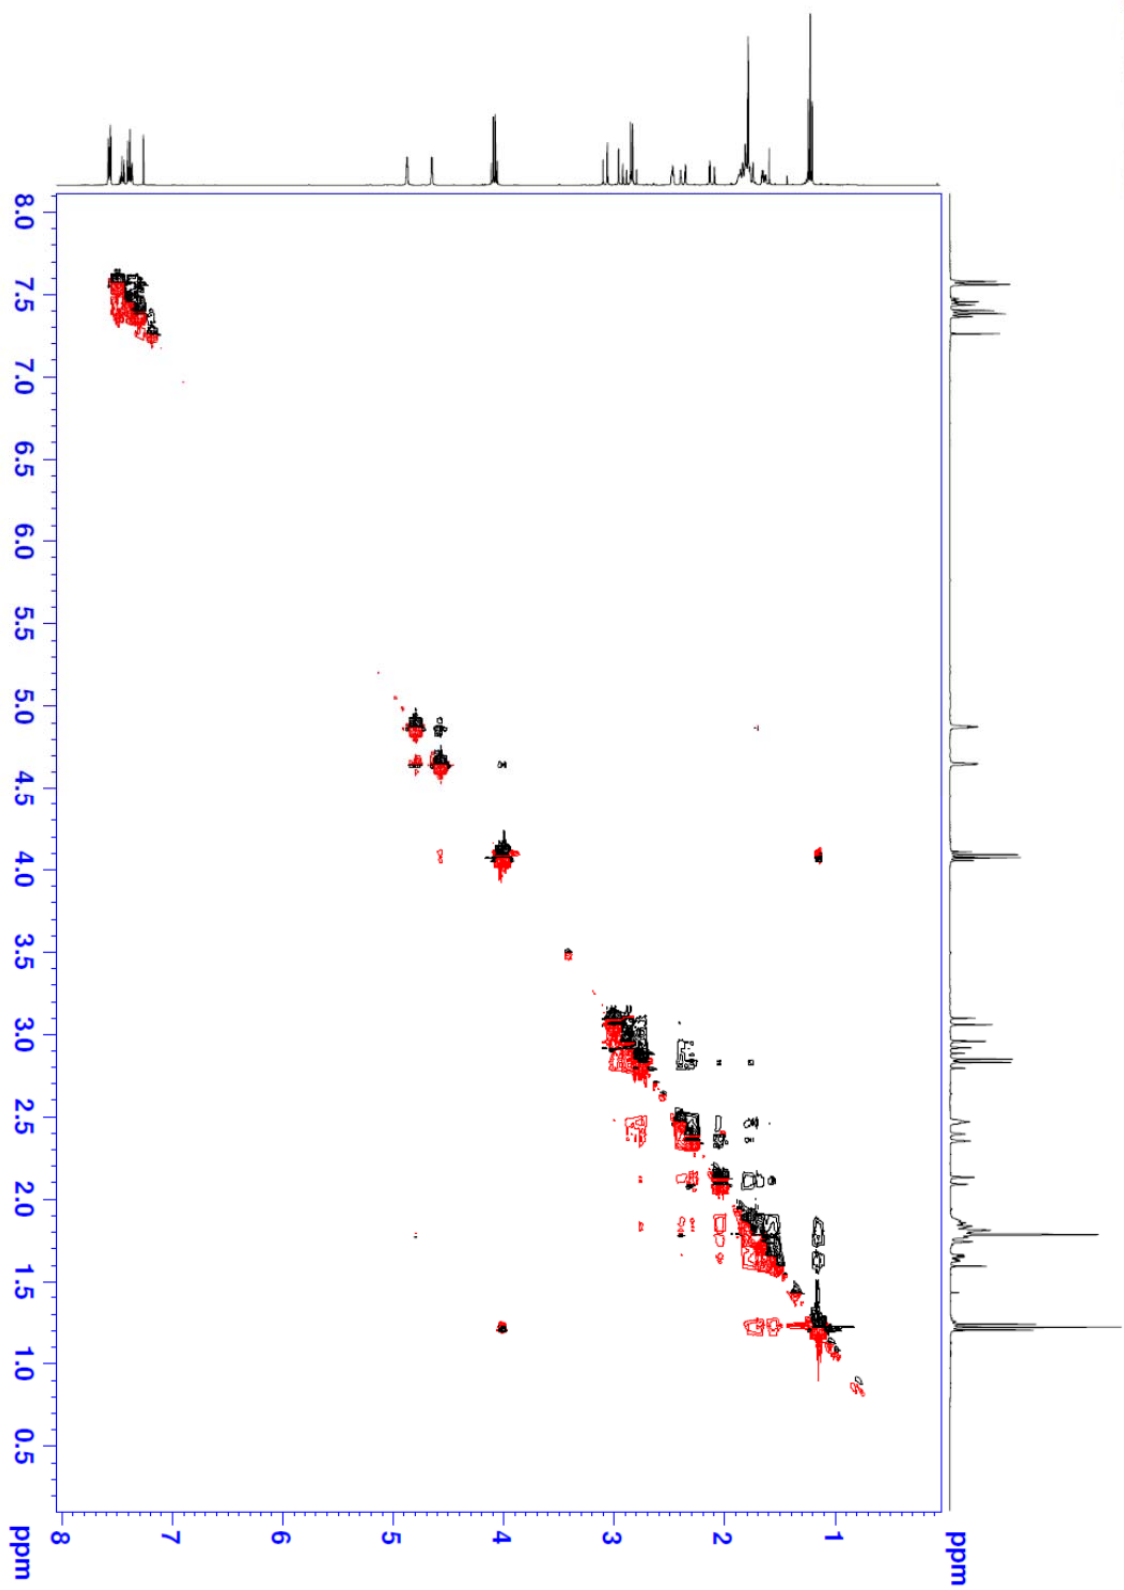

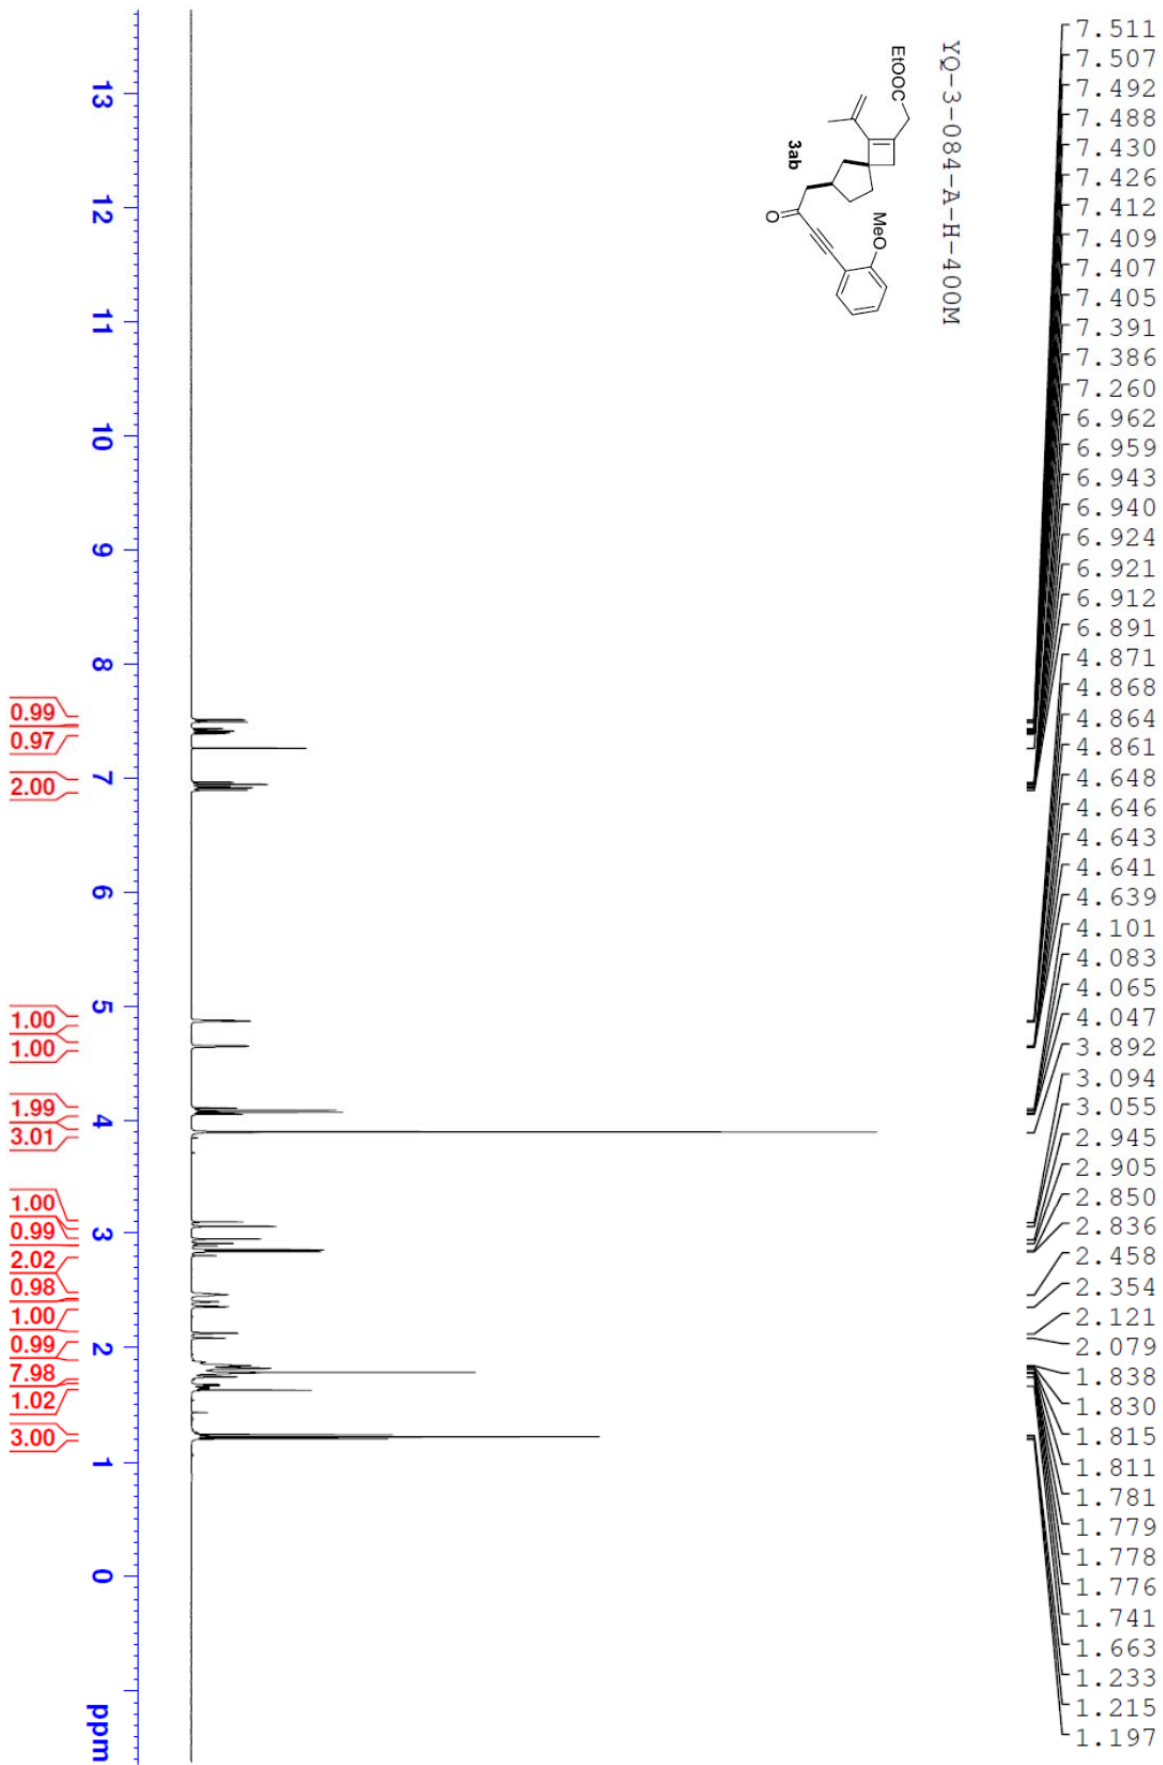

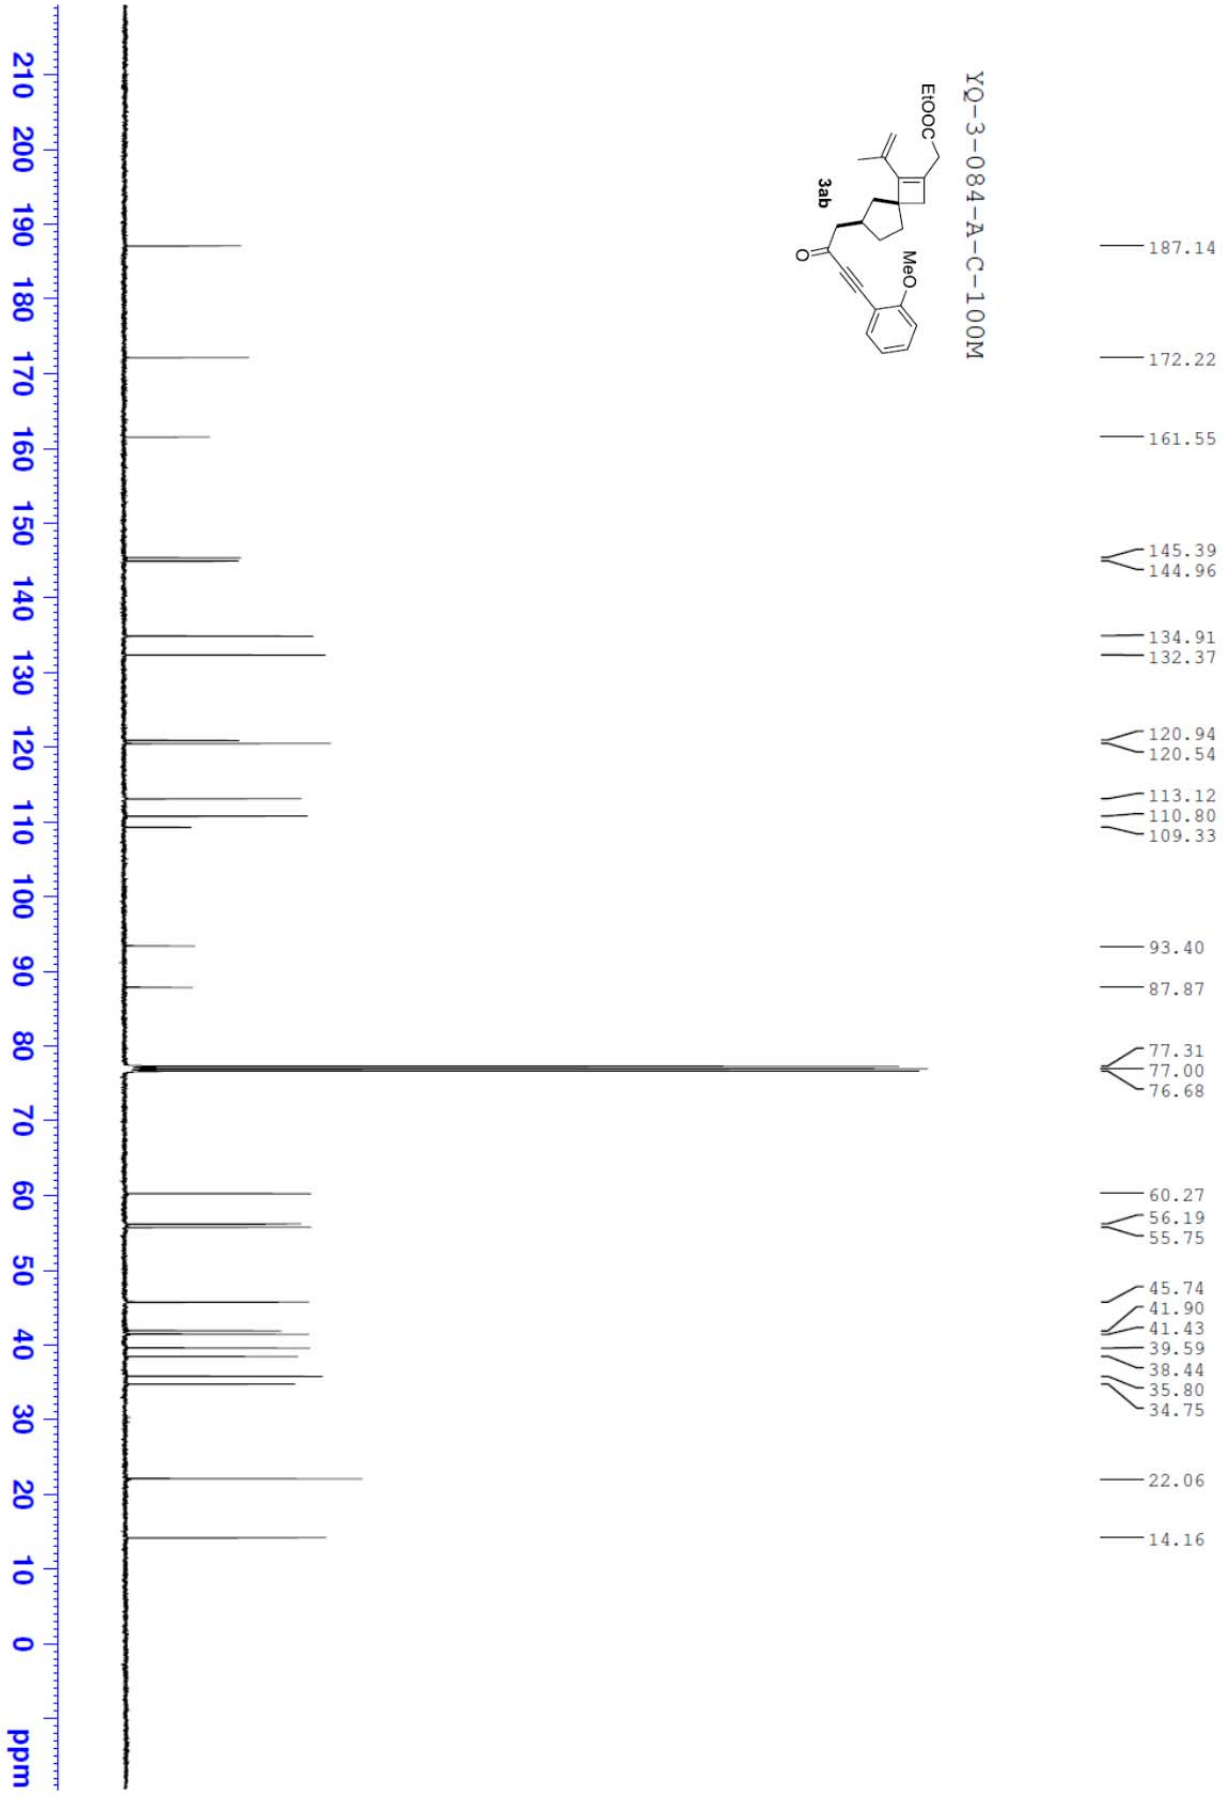

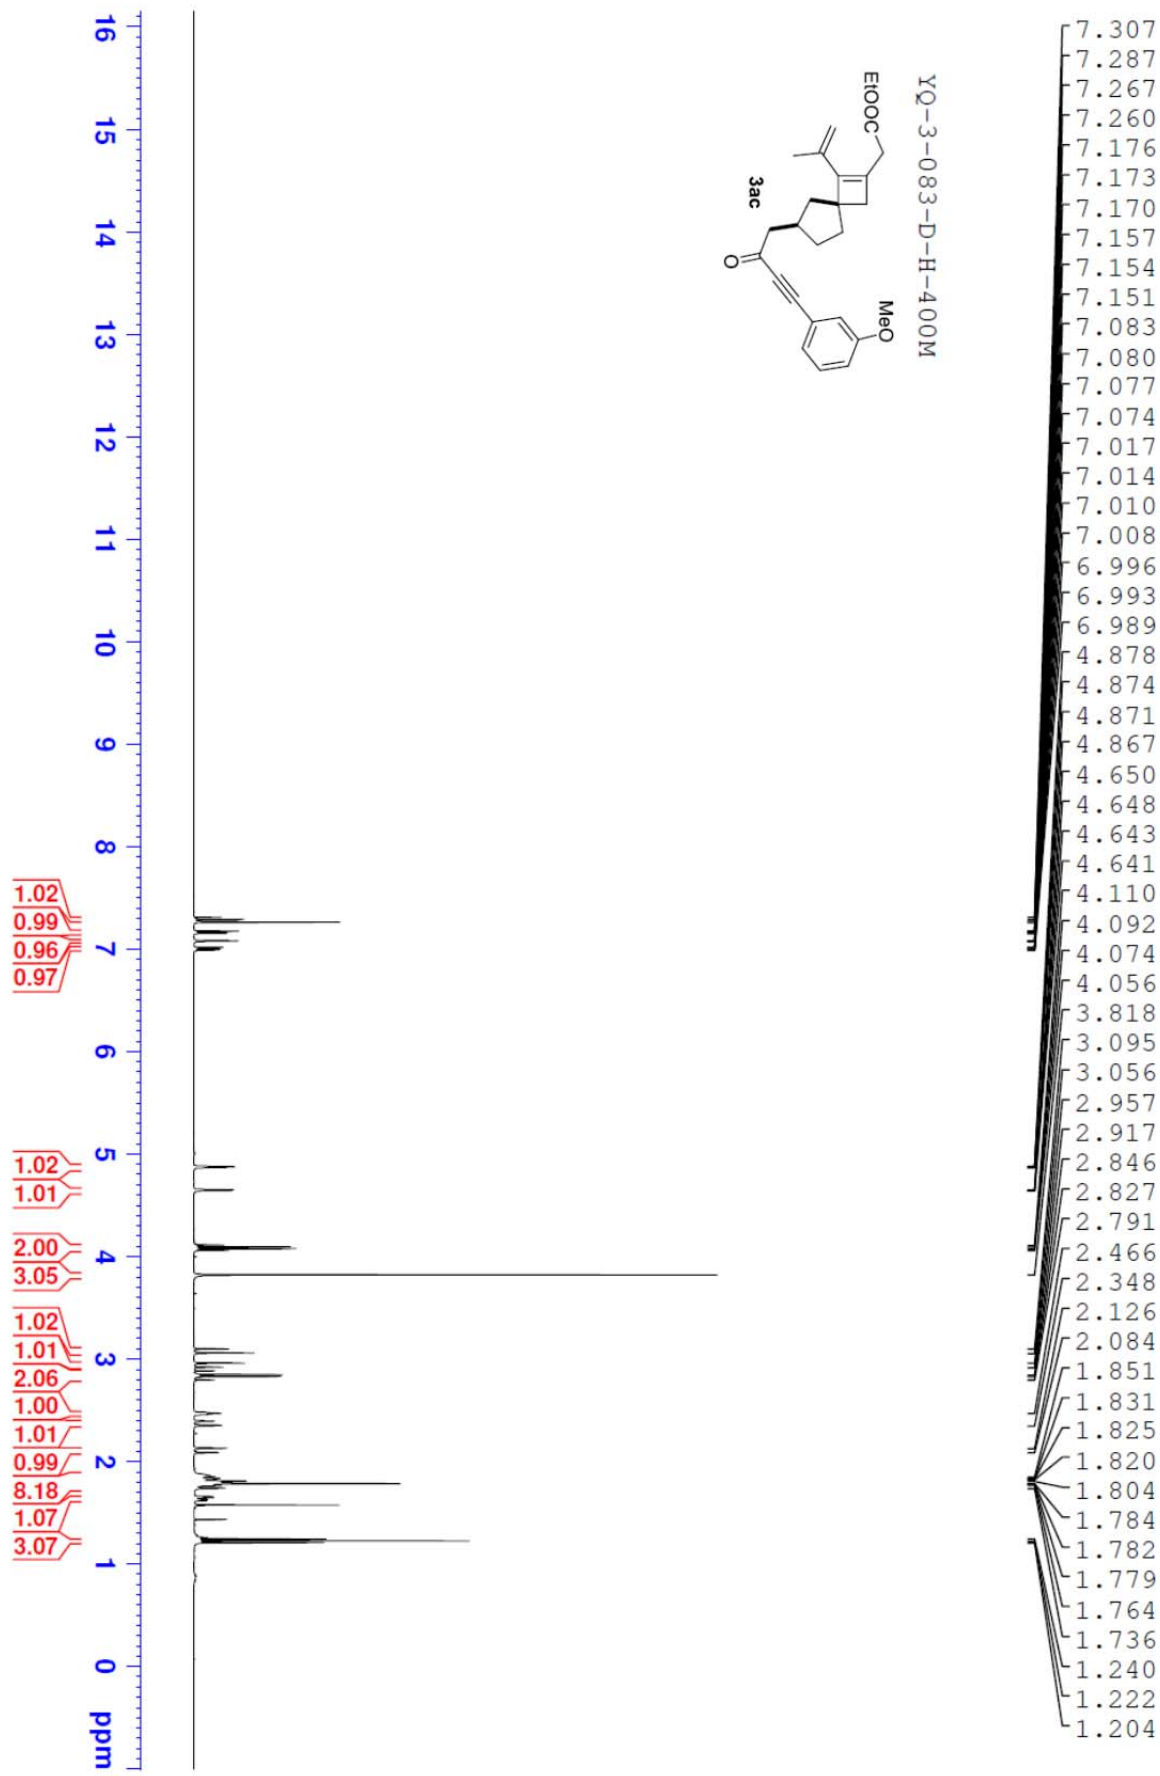

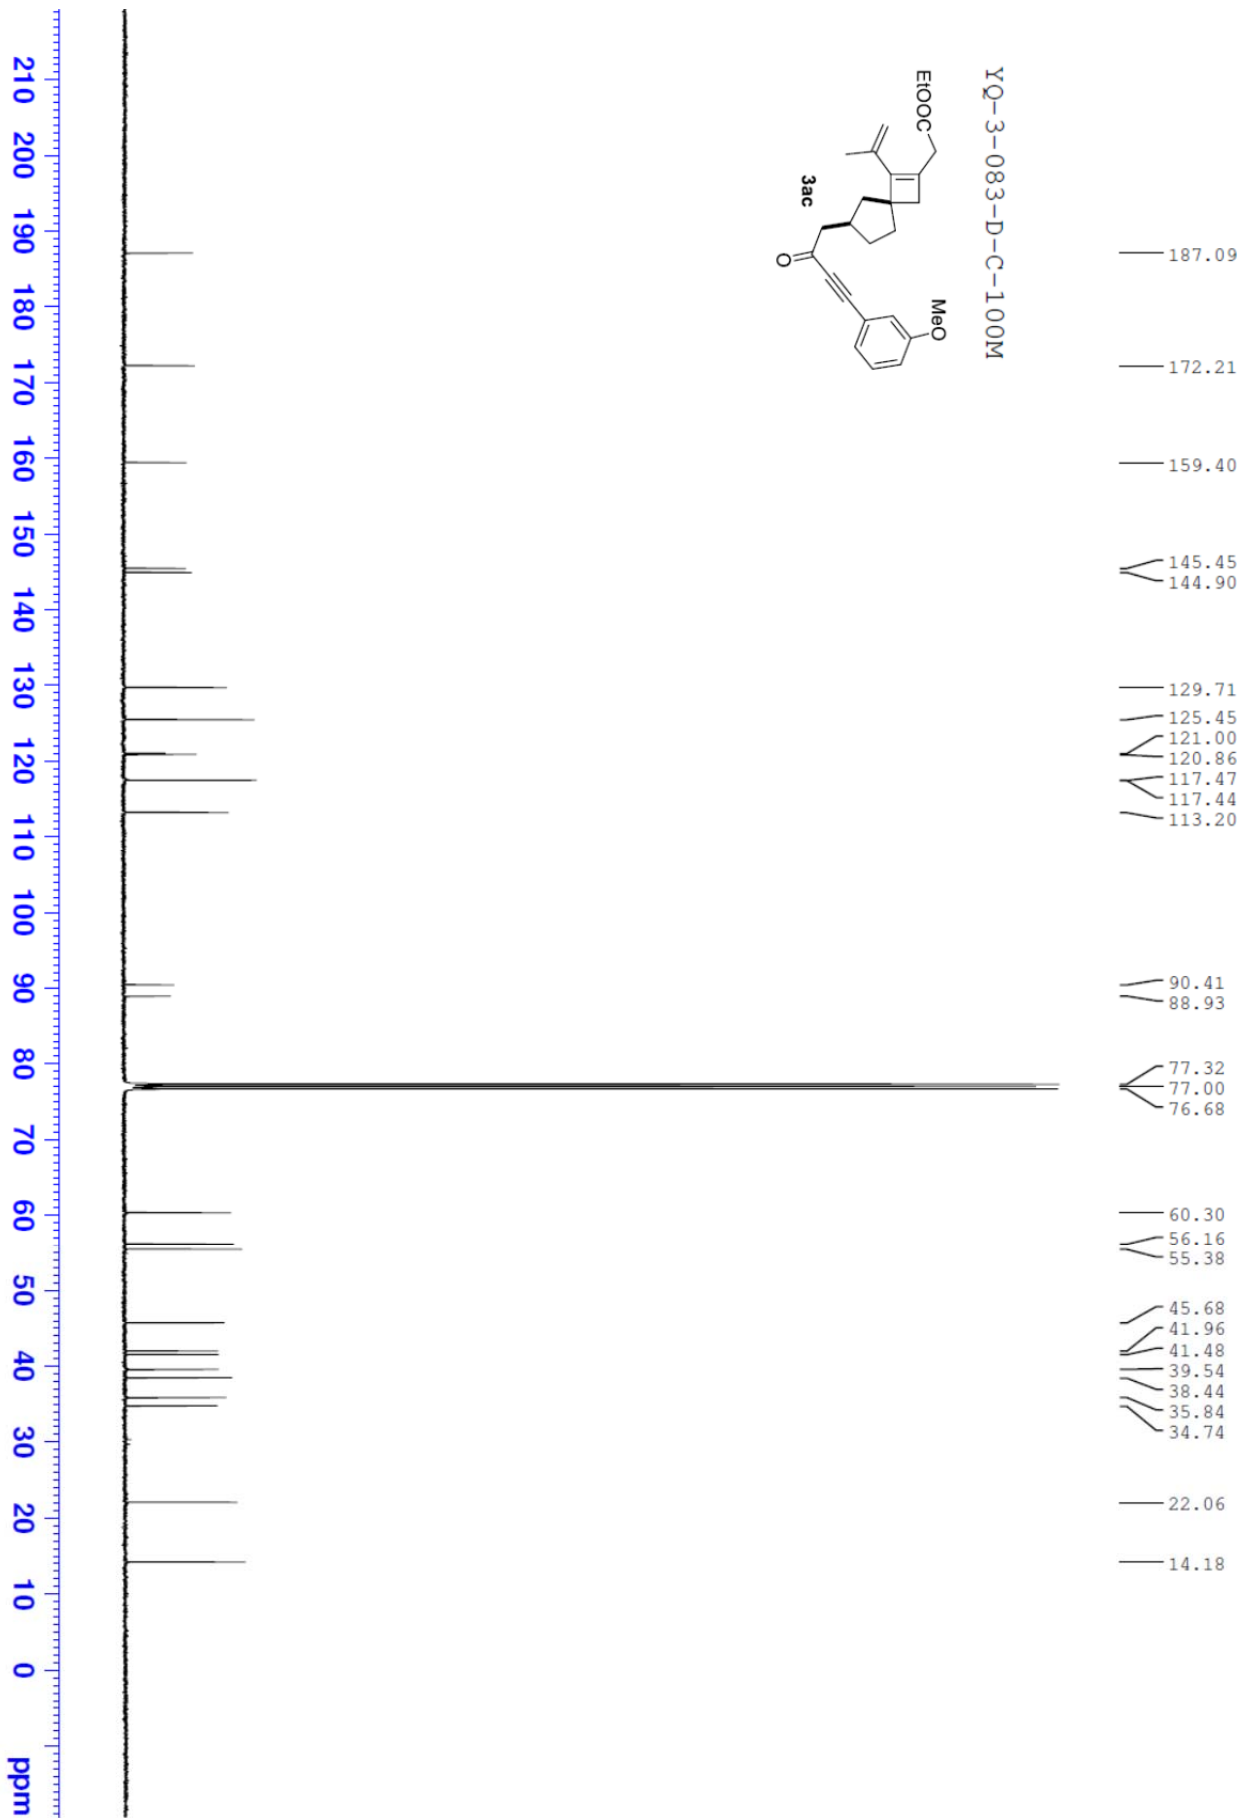

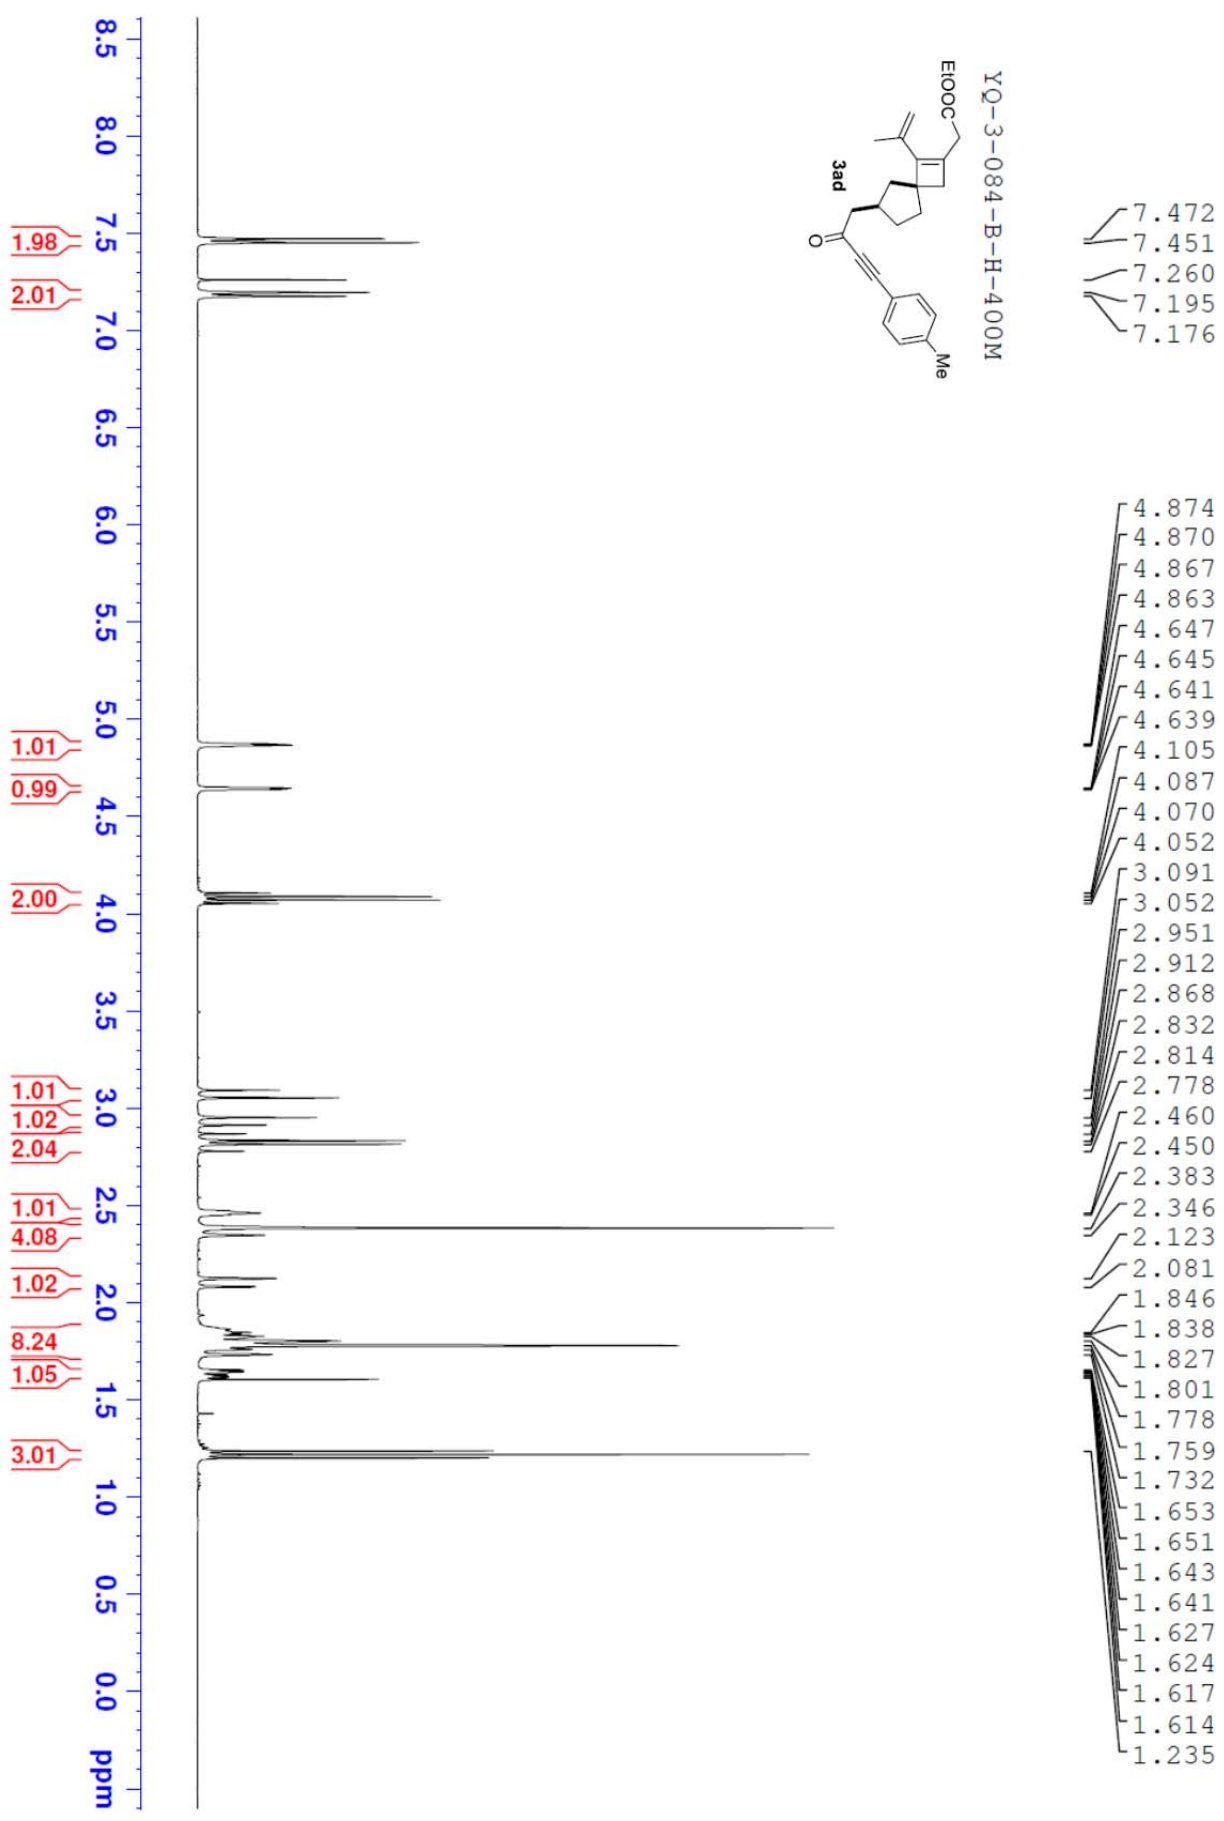

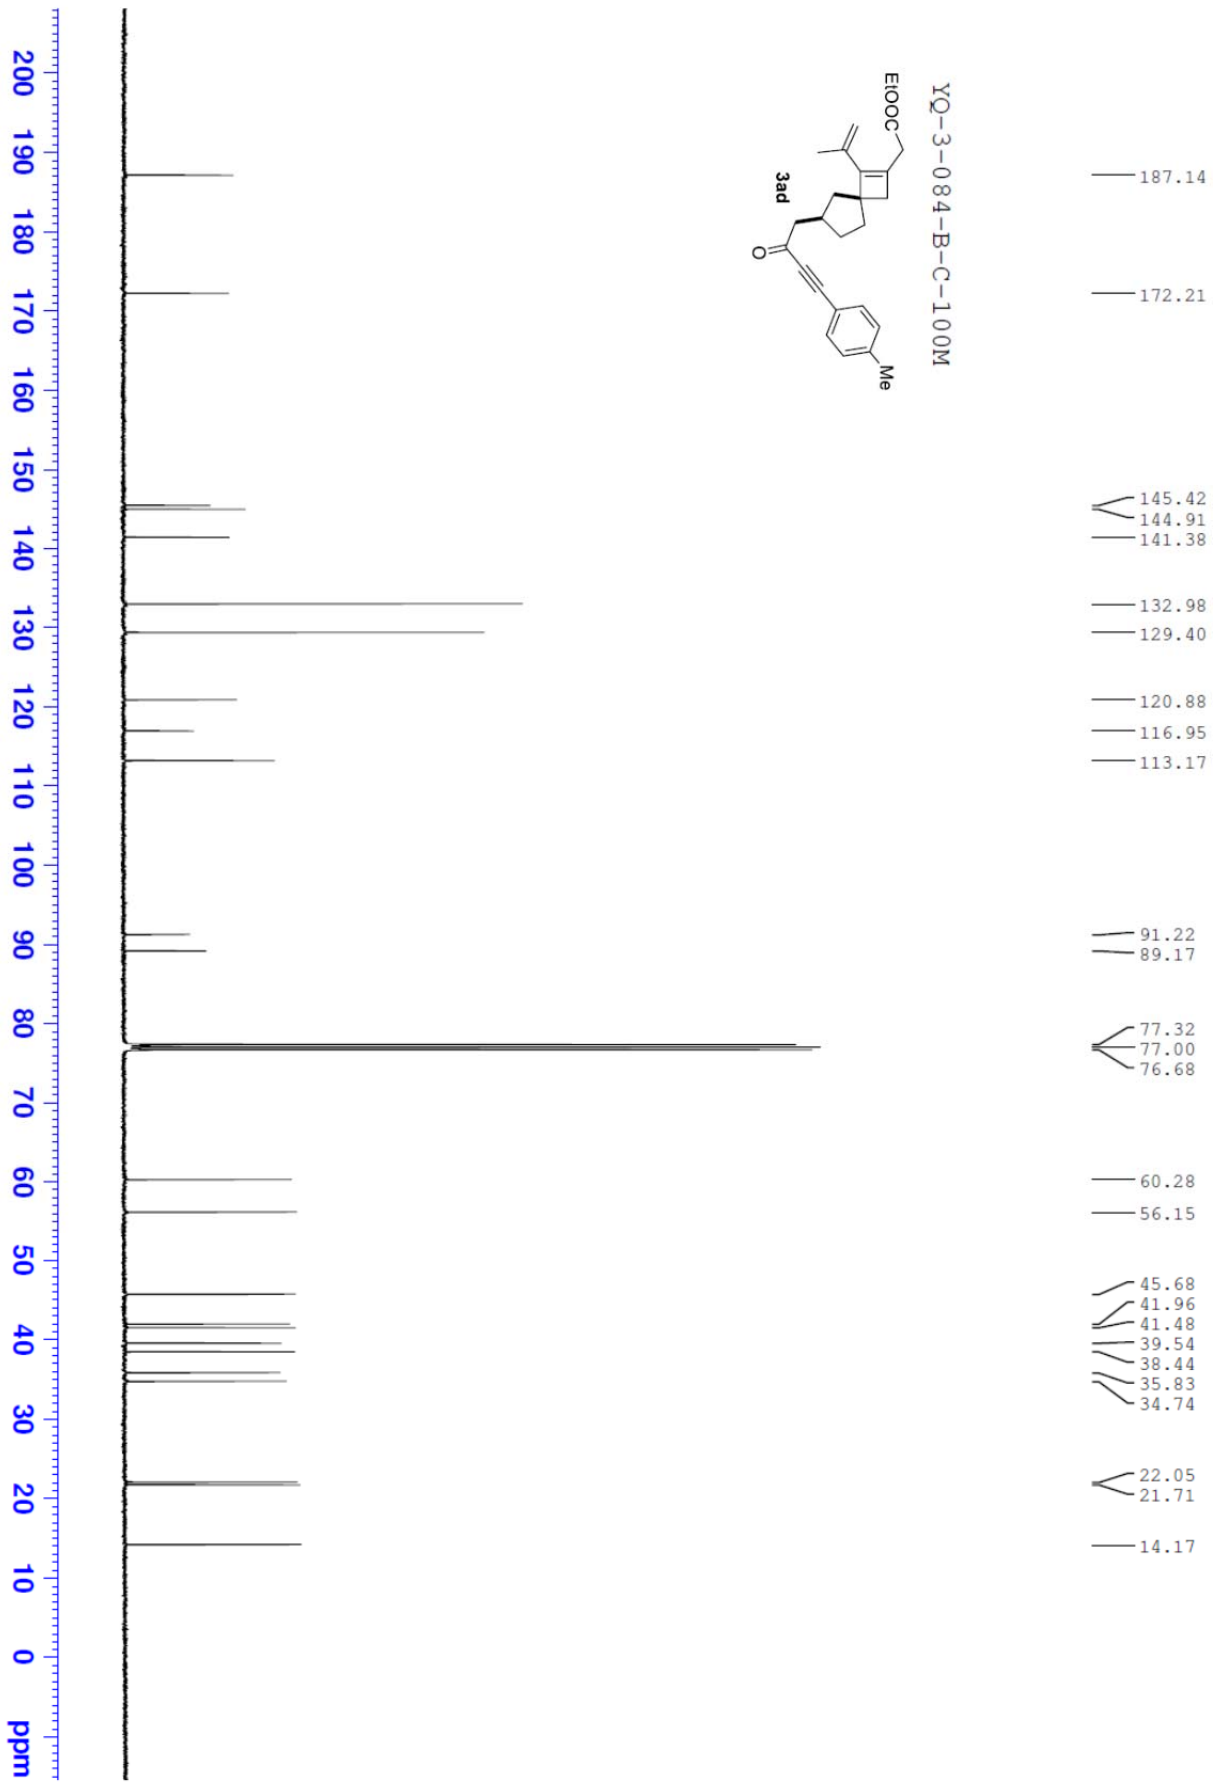



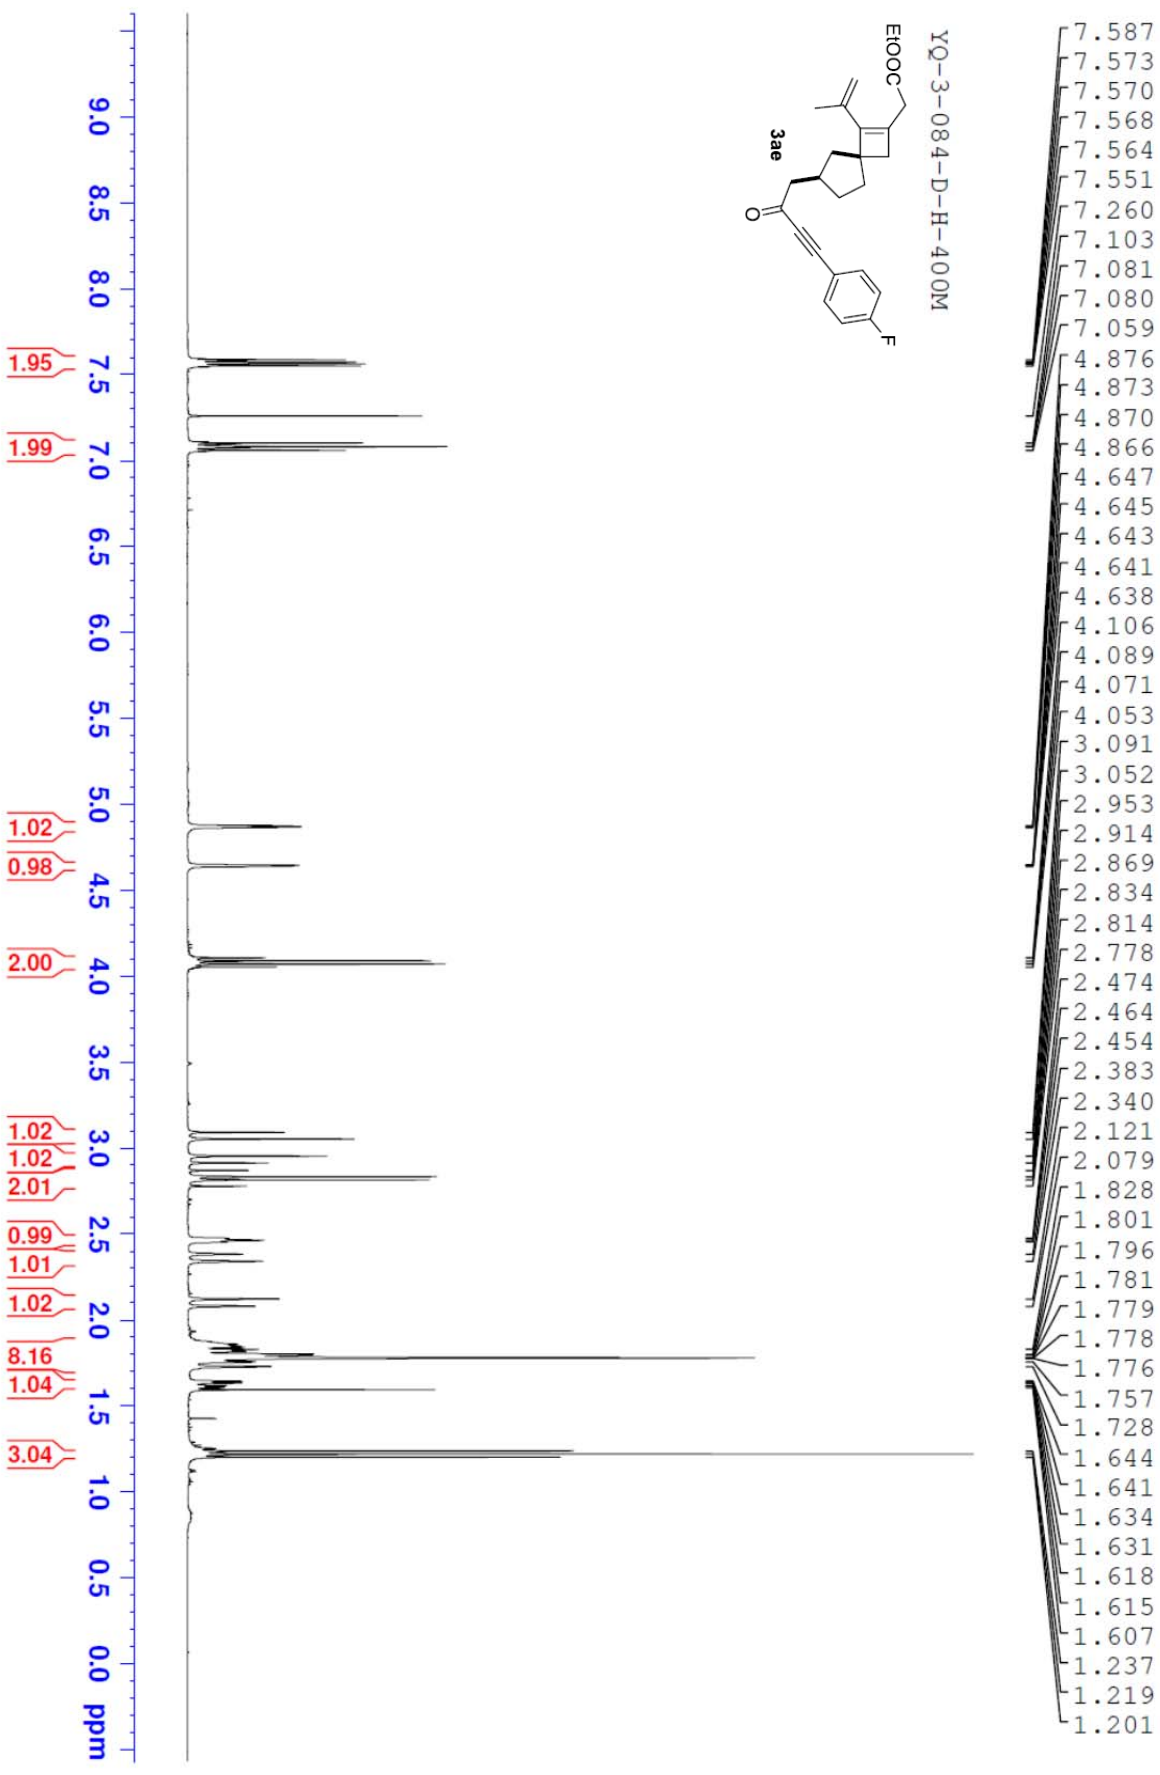

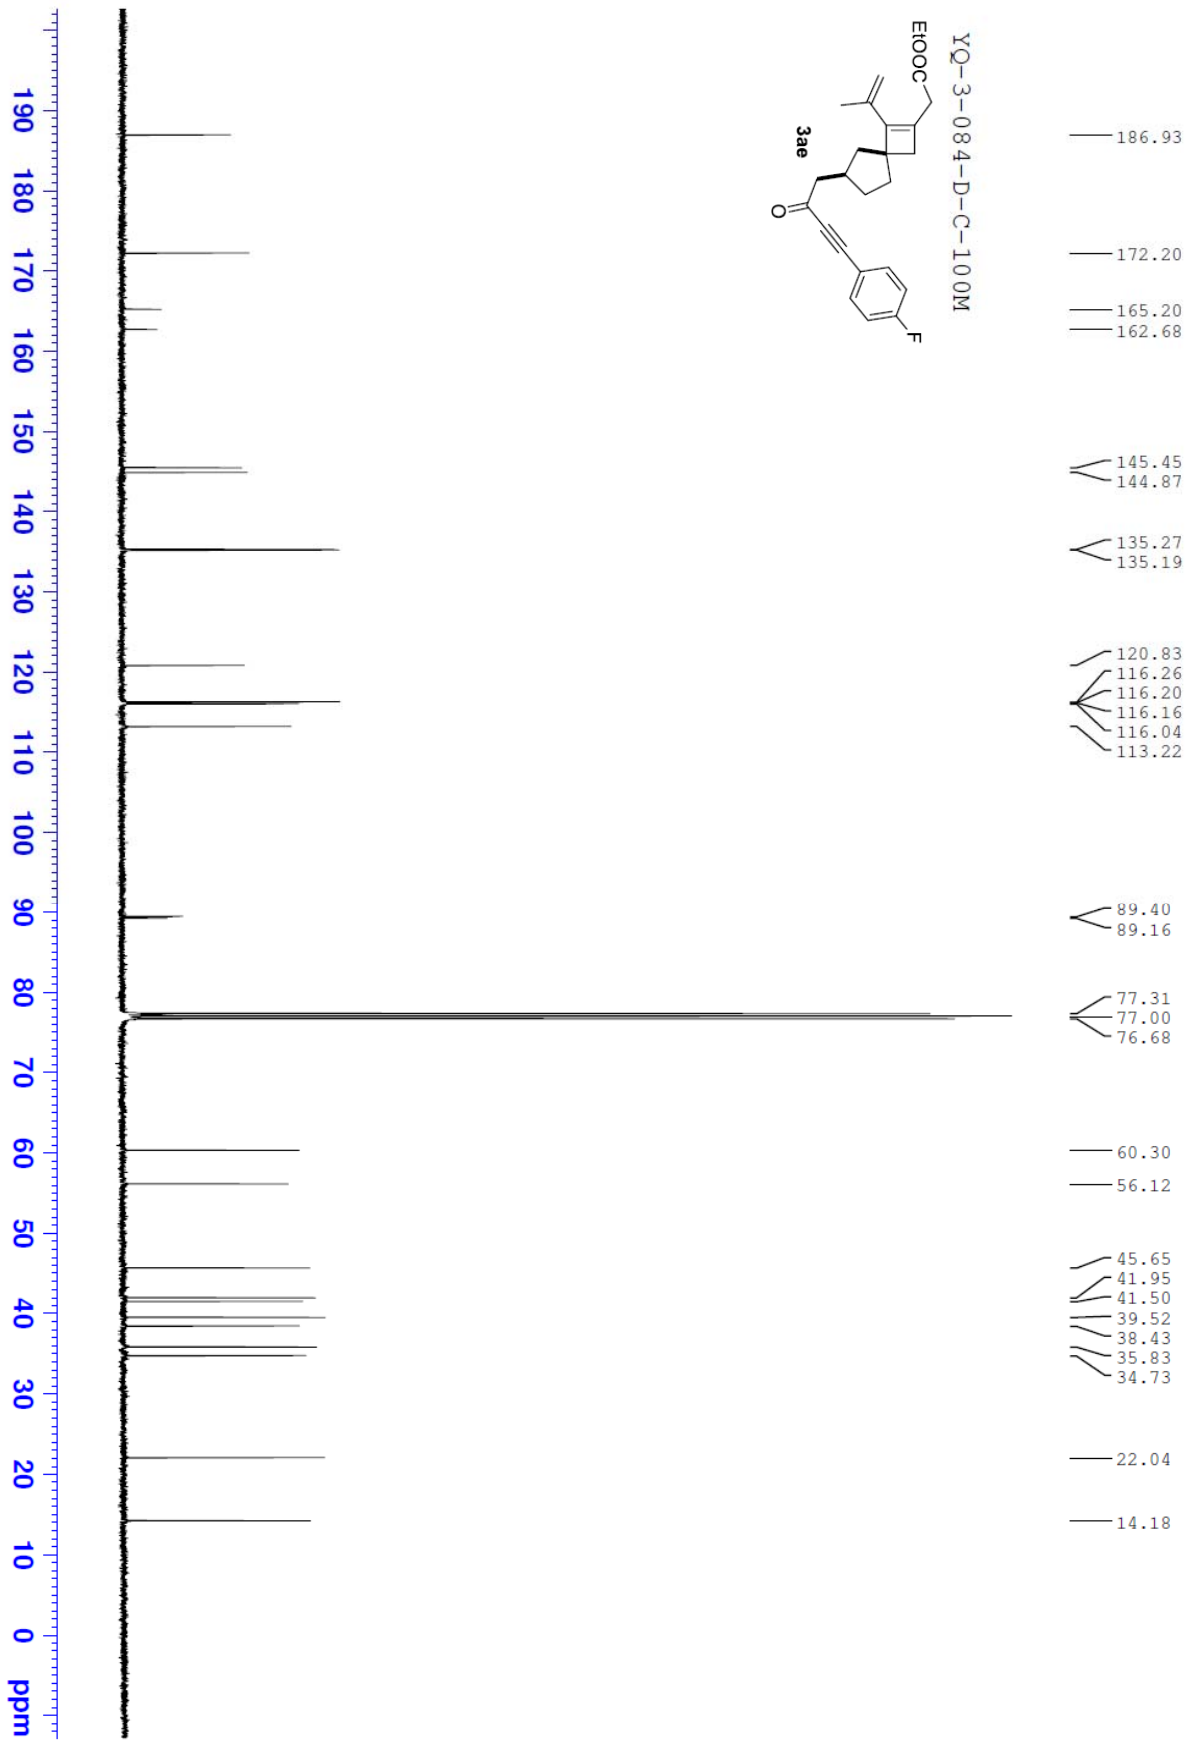

YQ-3-084-D-F

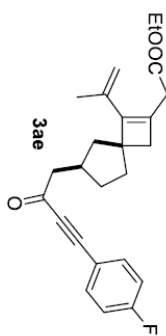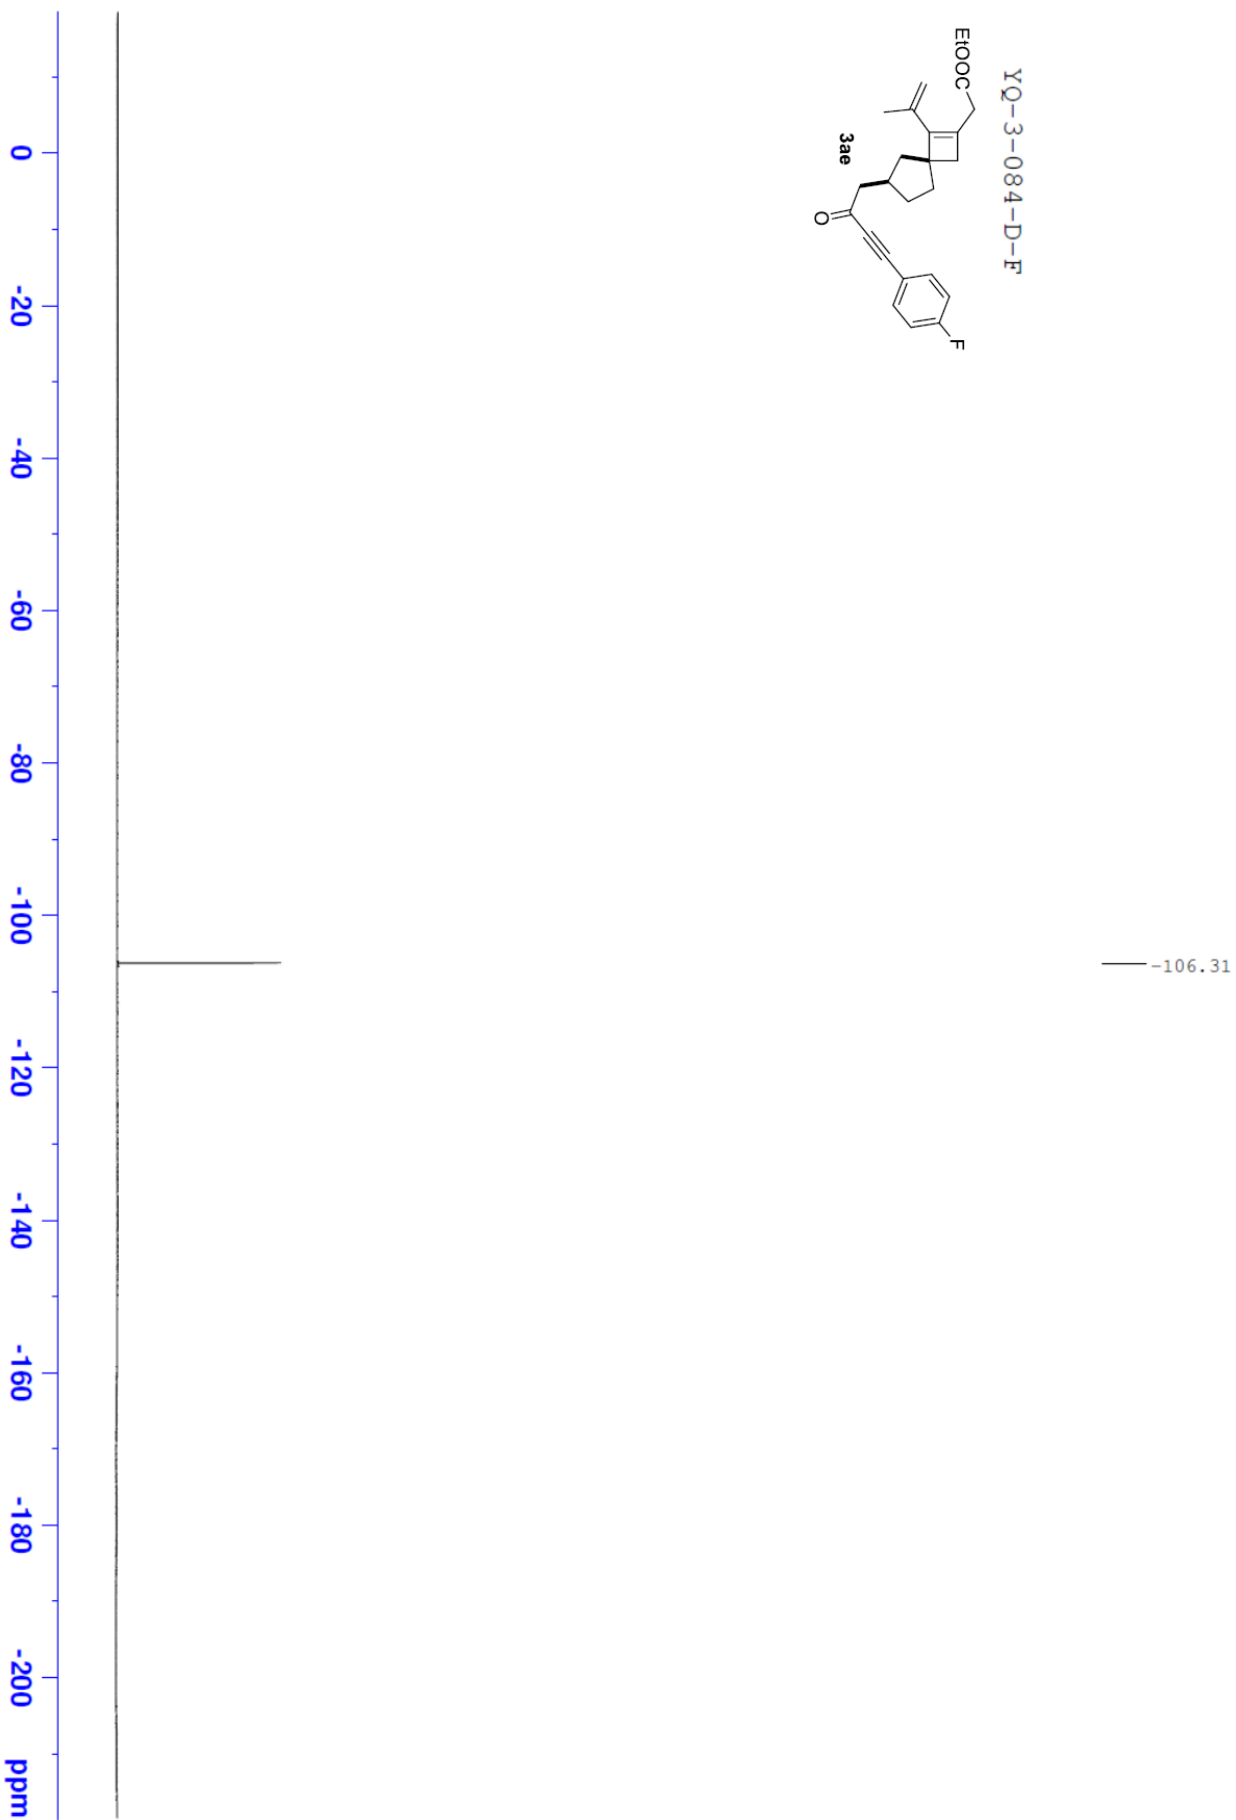

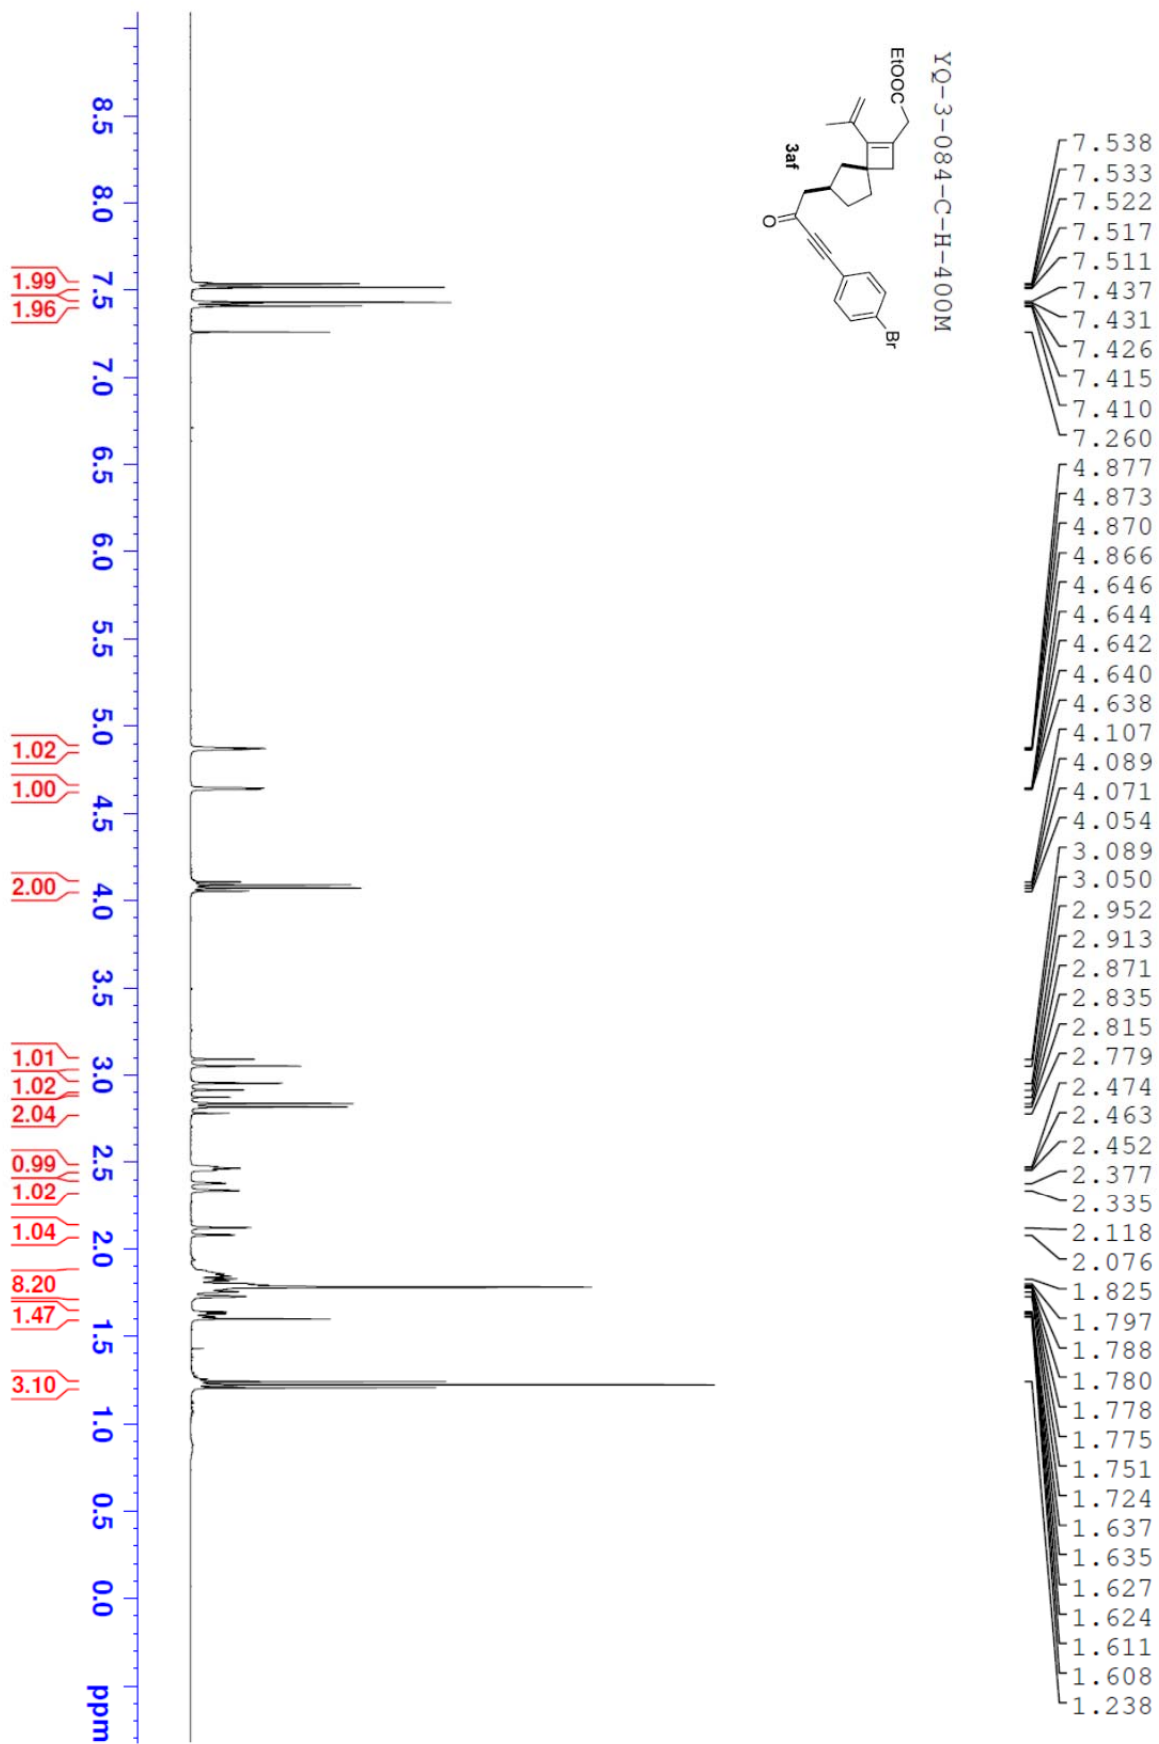

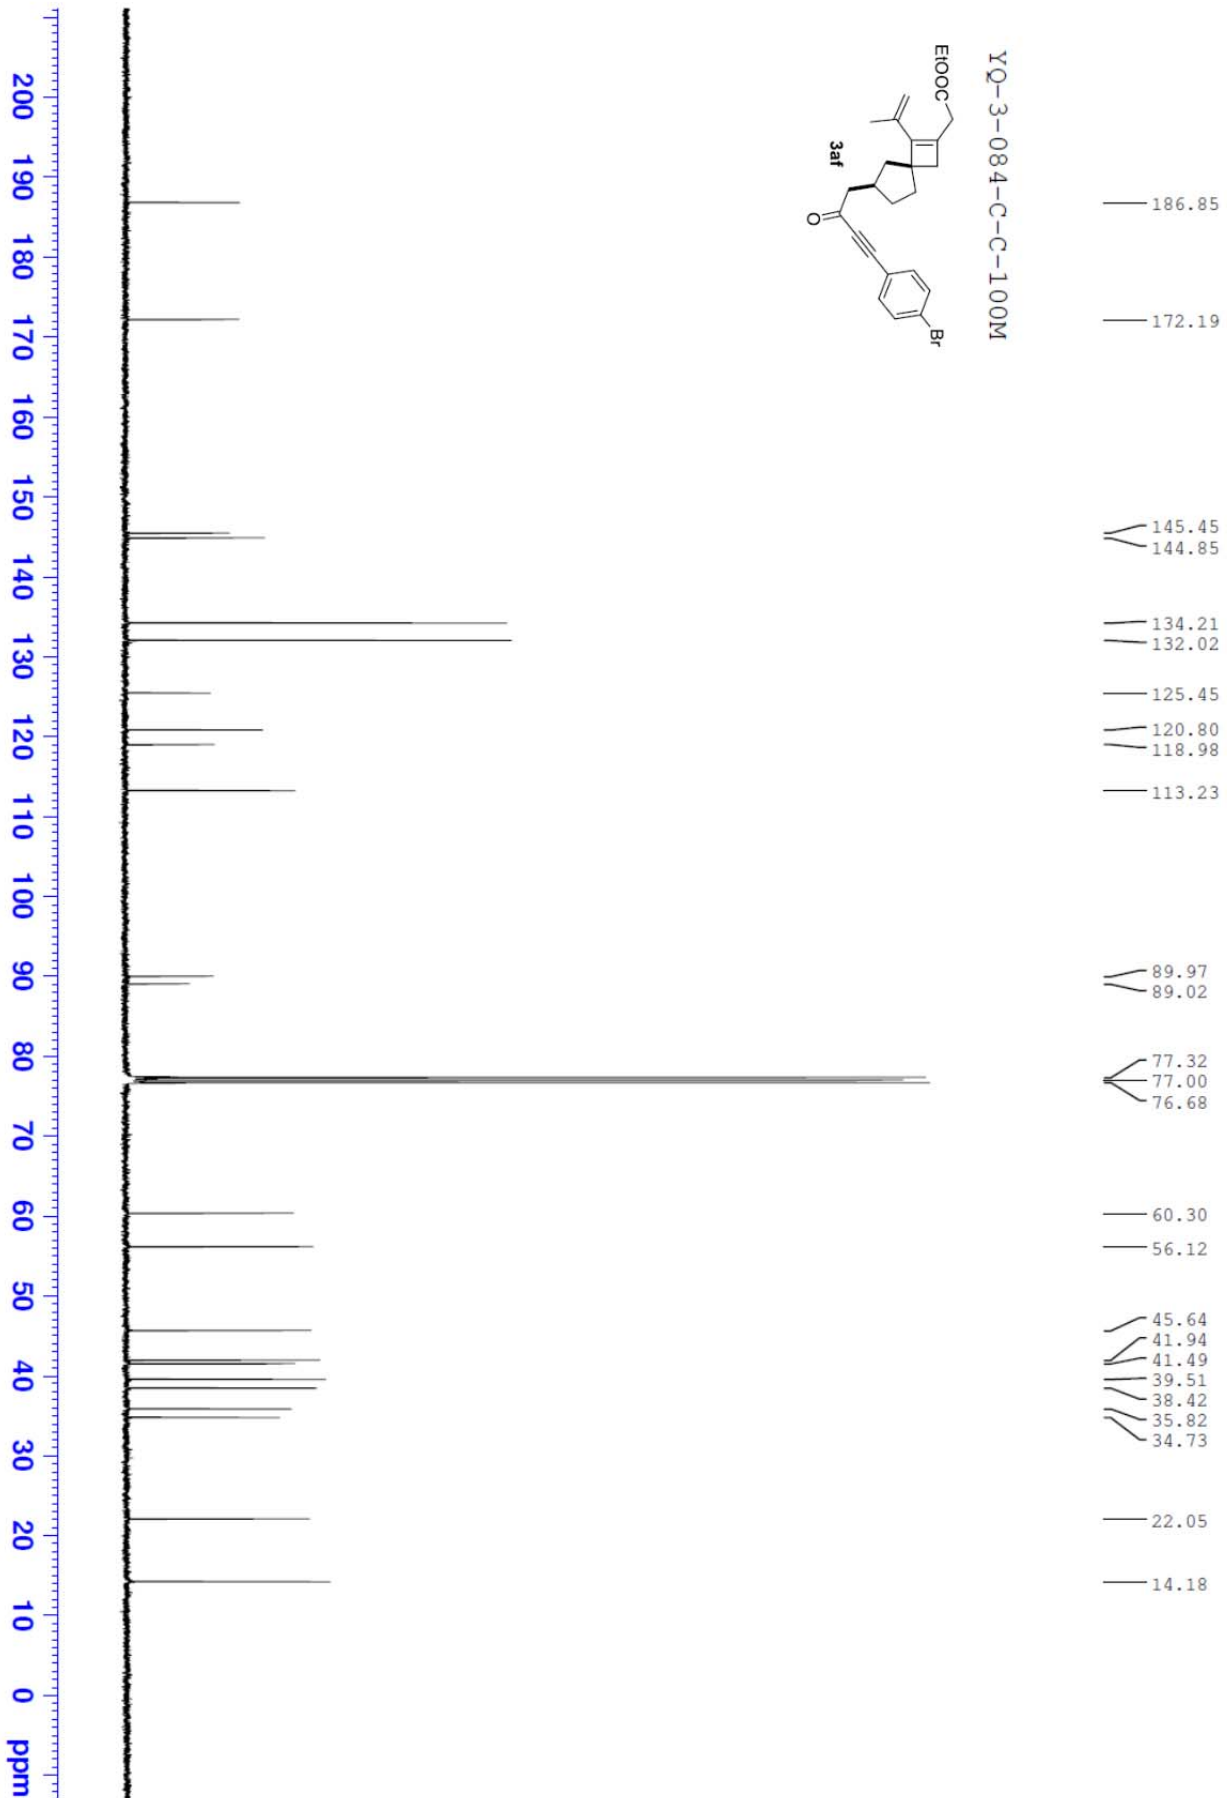

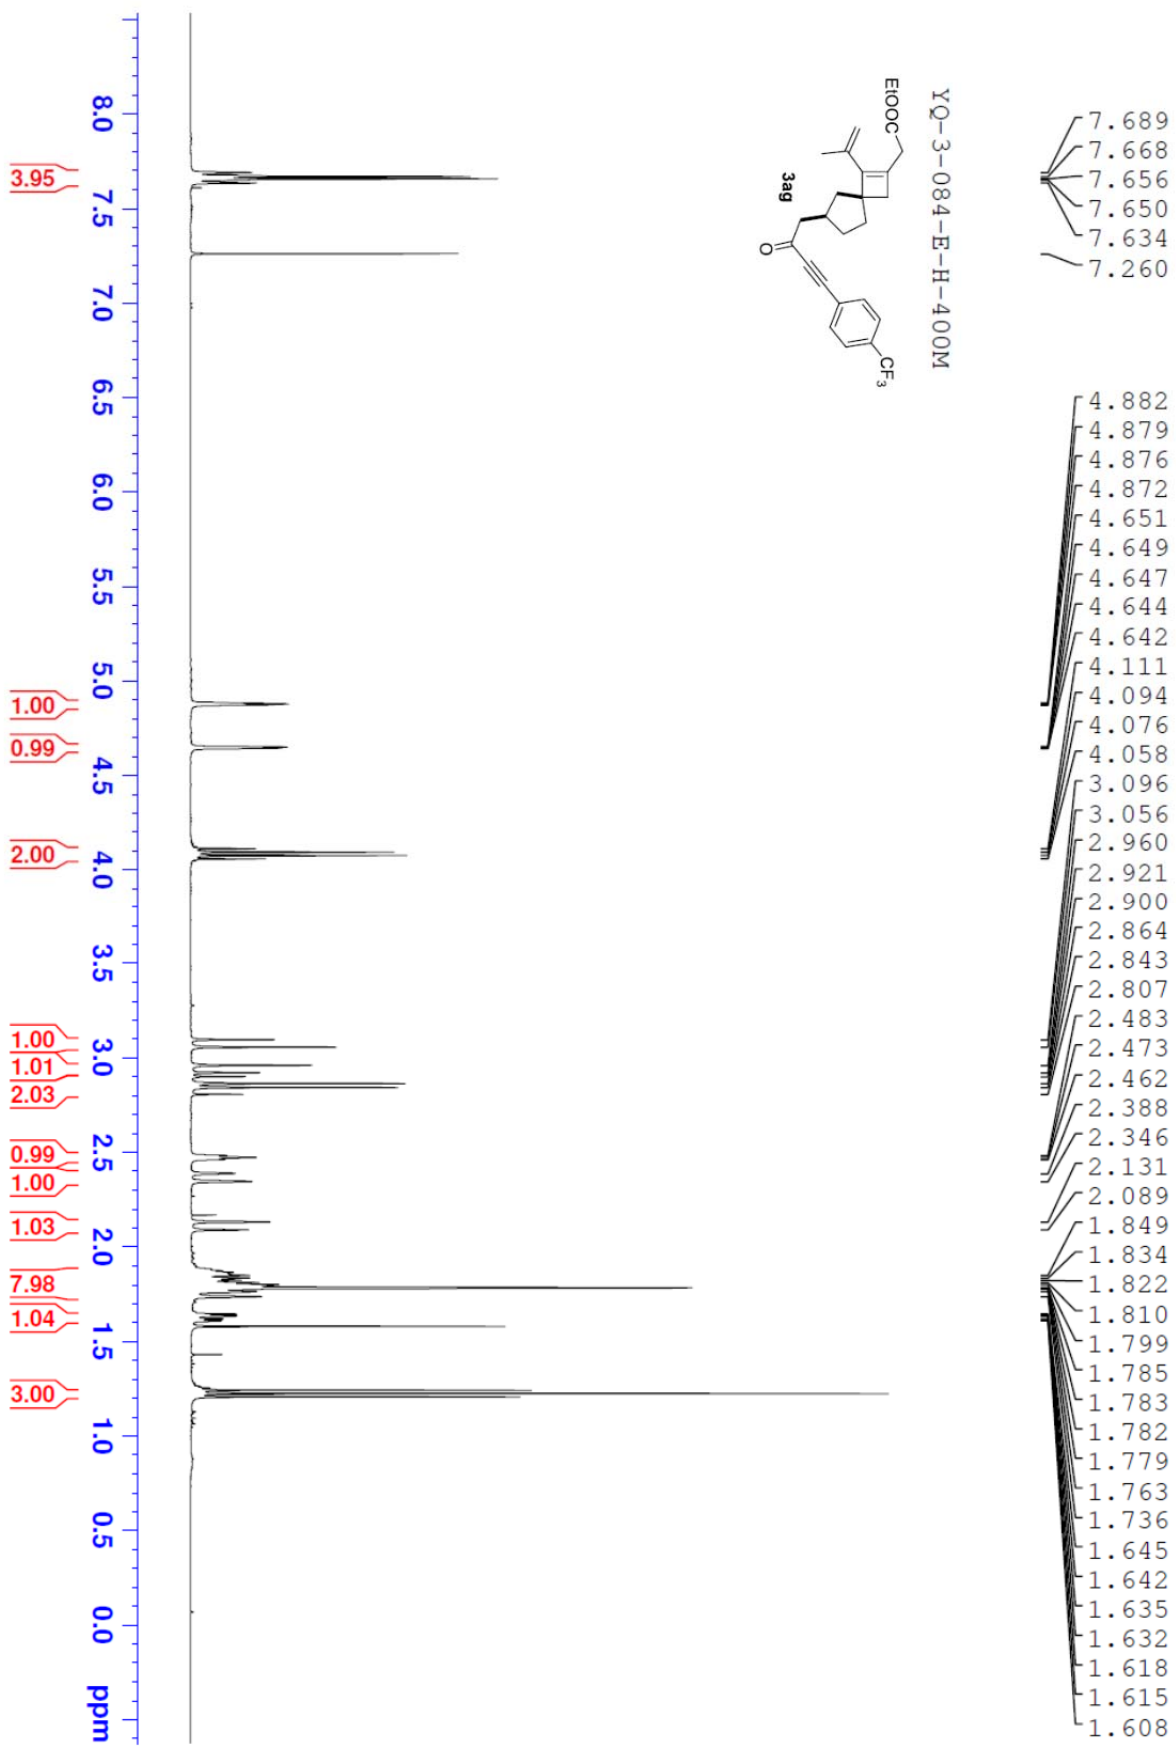

200 190 180 170 160 150 140 130 120 110 100 90 80 70 60 50 40 30 20 10 ppm

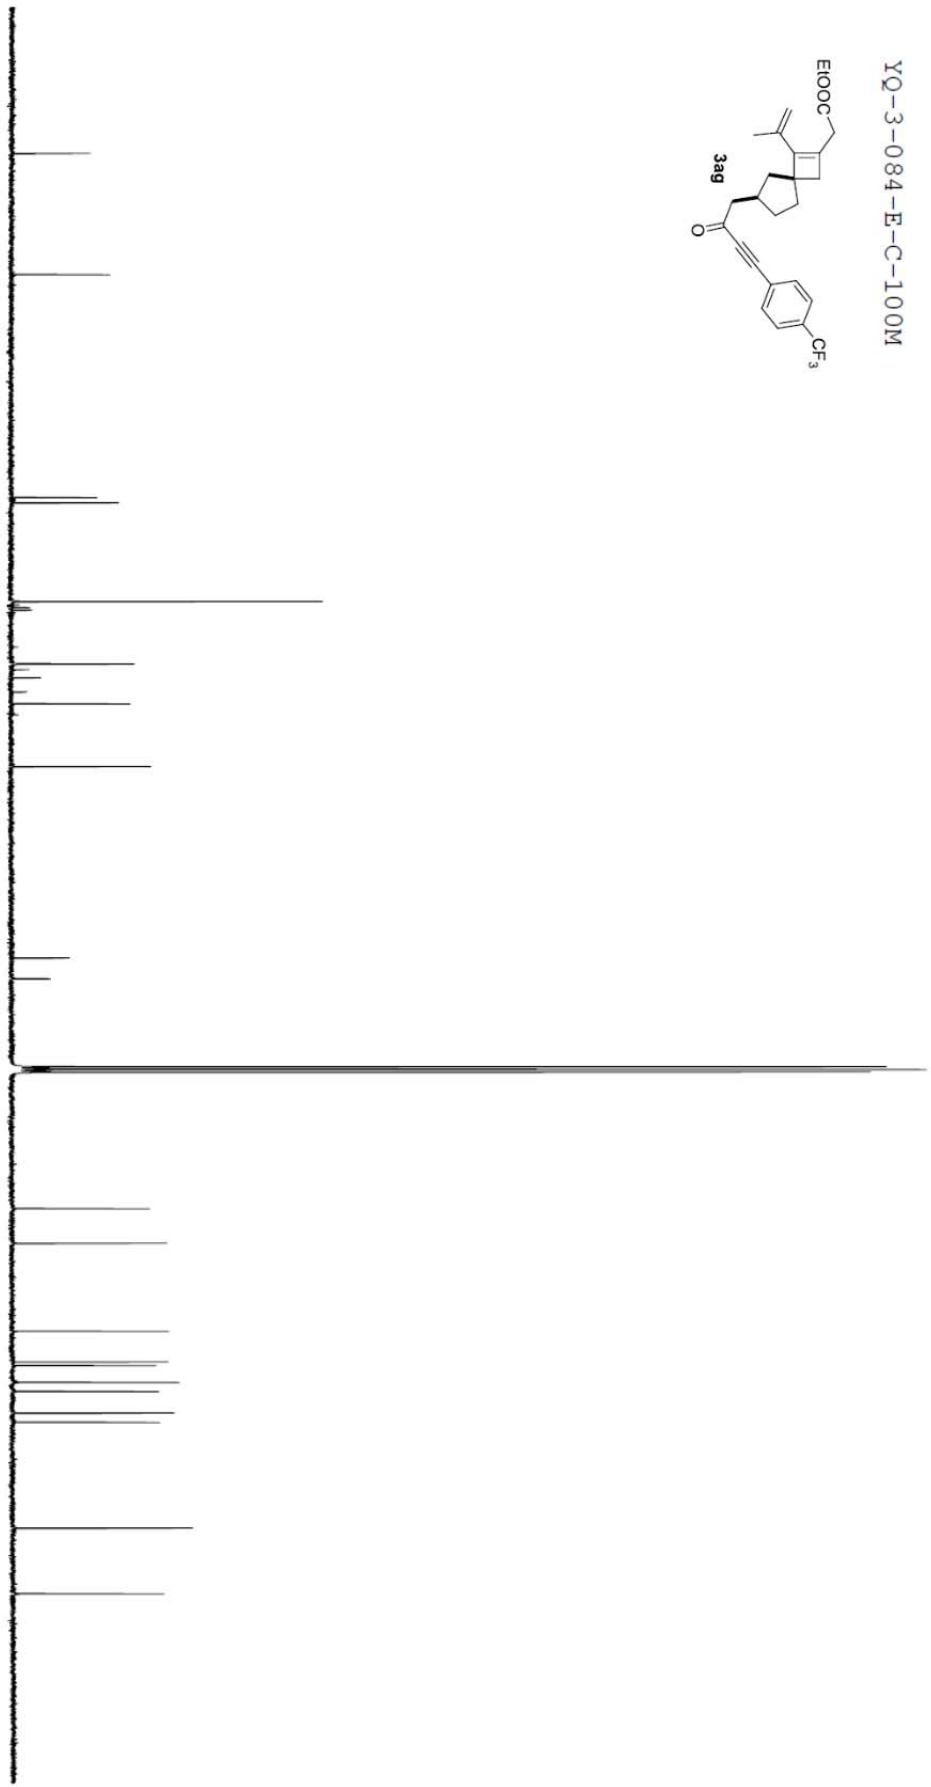

YQ-3-084-E-C-100M

- 186.70
- 172.19
- 145.49
- 144.83
- 133.04
- 132.31
- 131.99
- 125.61
- 125.57
- 125.53
- 125.50
- 124.88
- 123.90
- 122.17
- 120.78
- 113.27
- 90.33
- 87.85
- 77.32
- 77.00
- 76.68
- 60.31
- 56.16
- 45.62
- 41.94
- 41.50
- 39.51
- 38.42
- 35.83
- 34.73
- 22.04
- 14.18

YQ-3-084-E-F

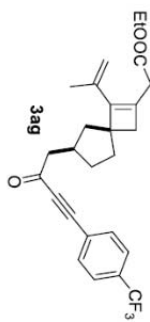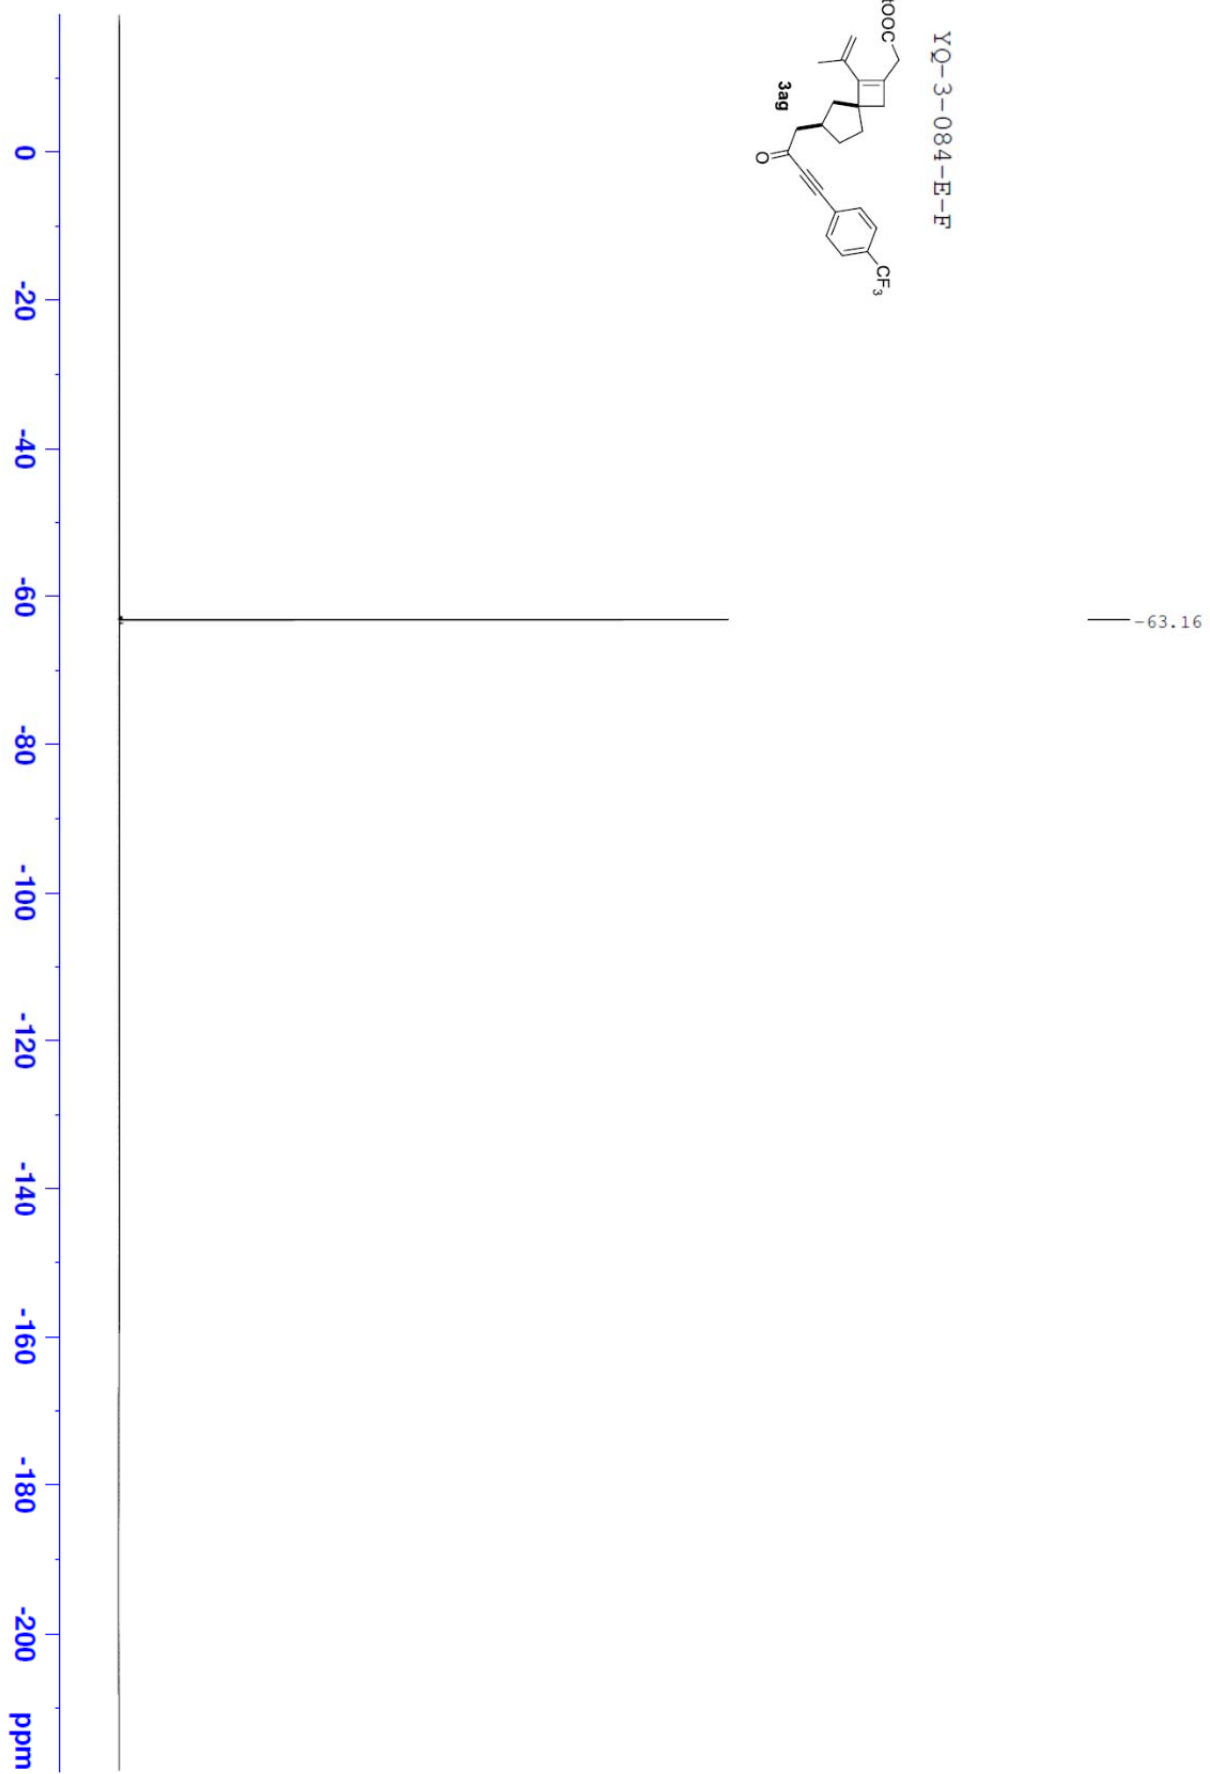



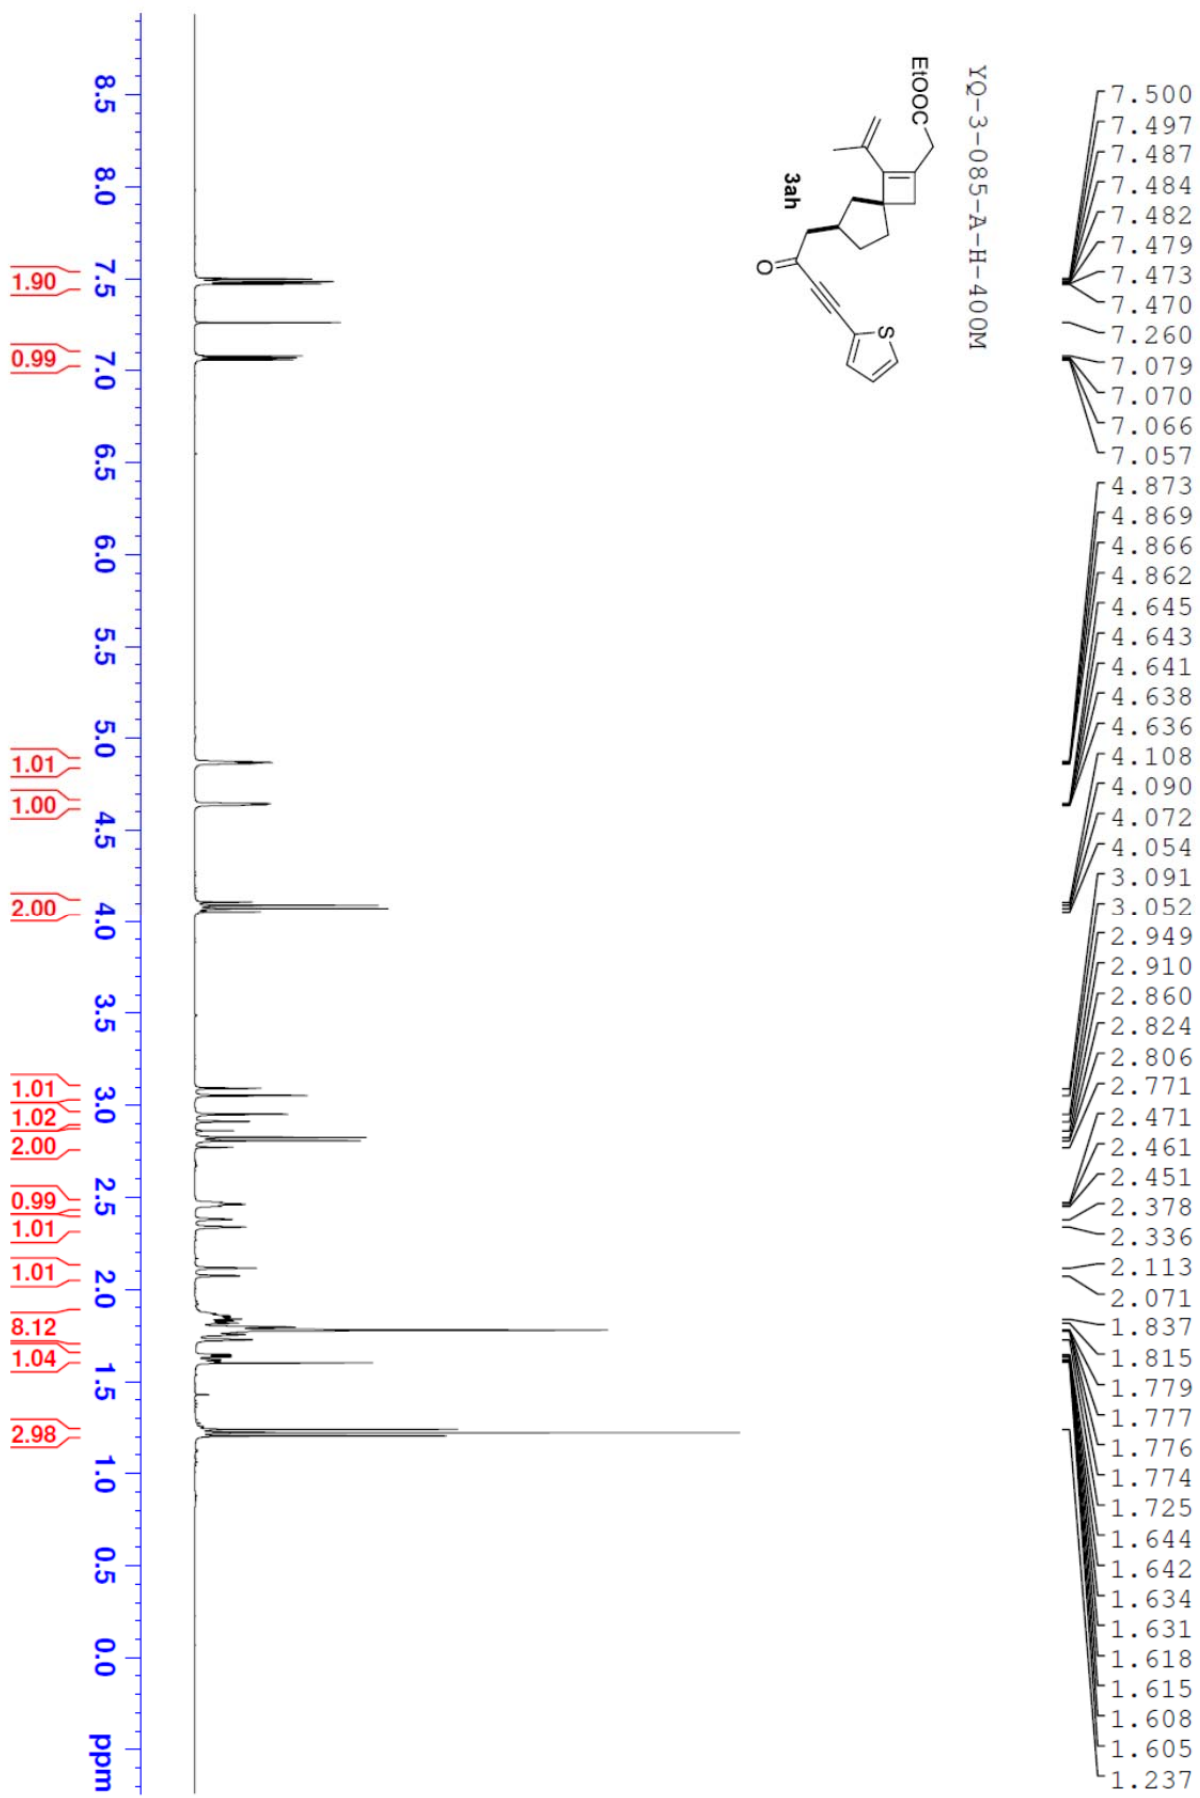

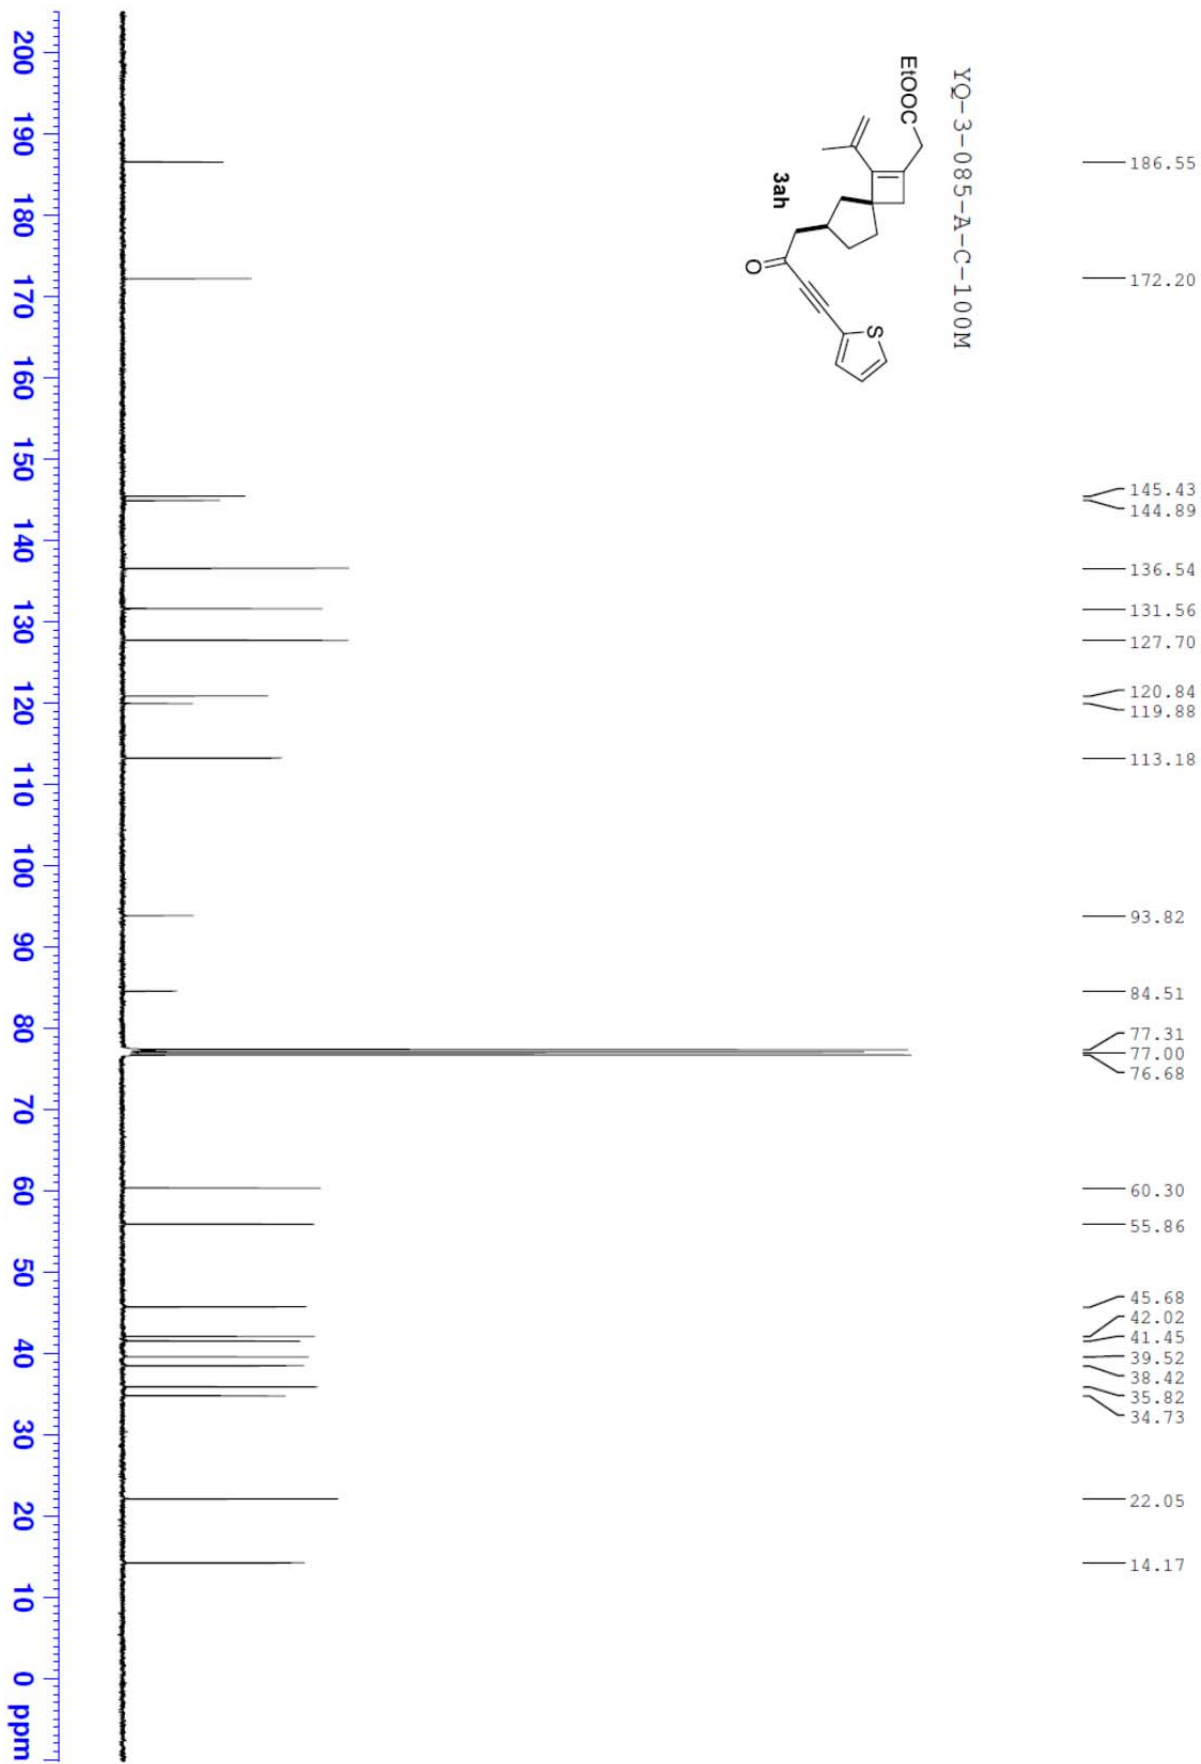

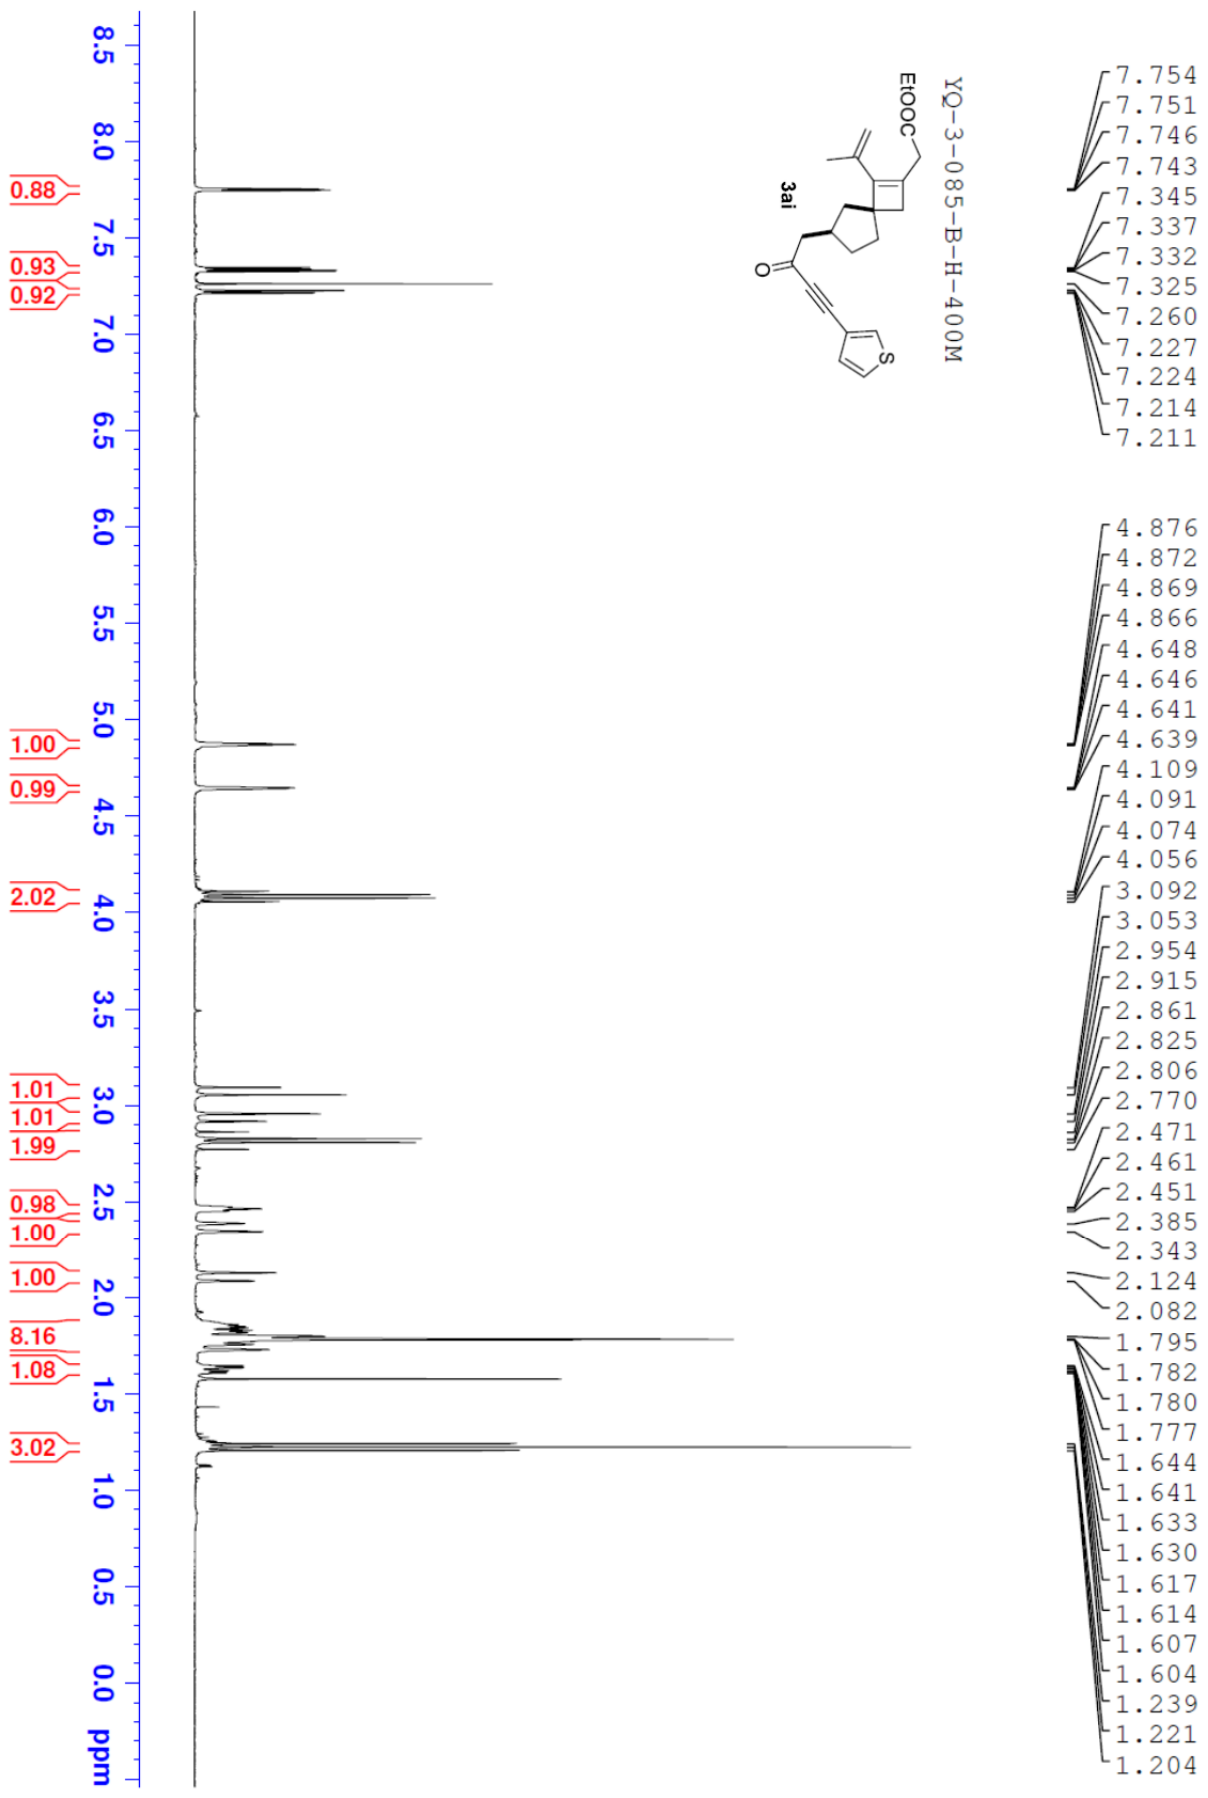

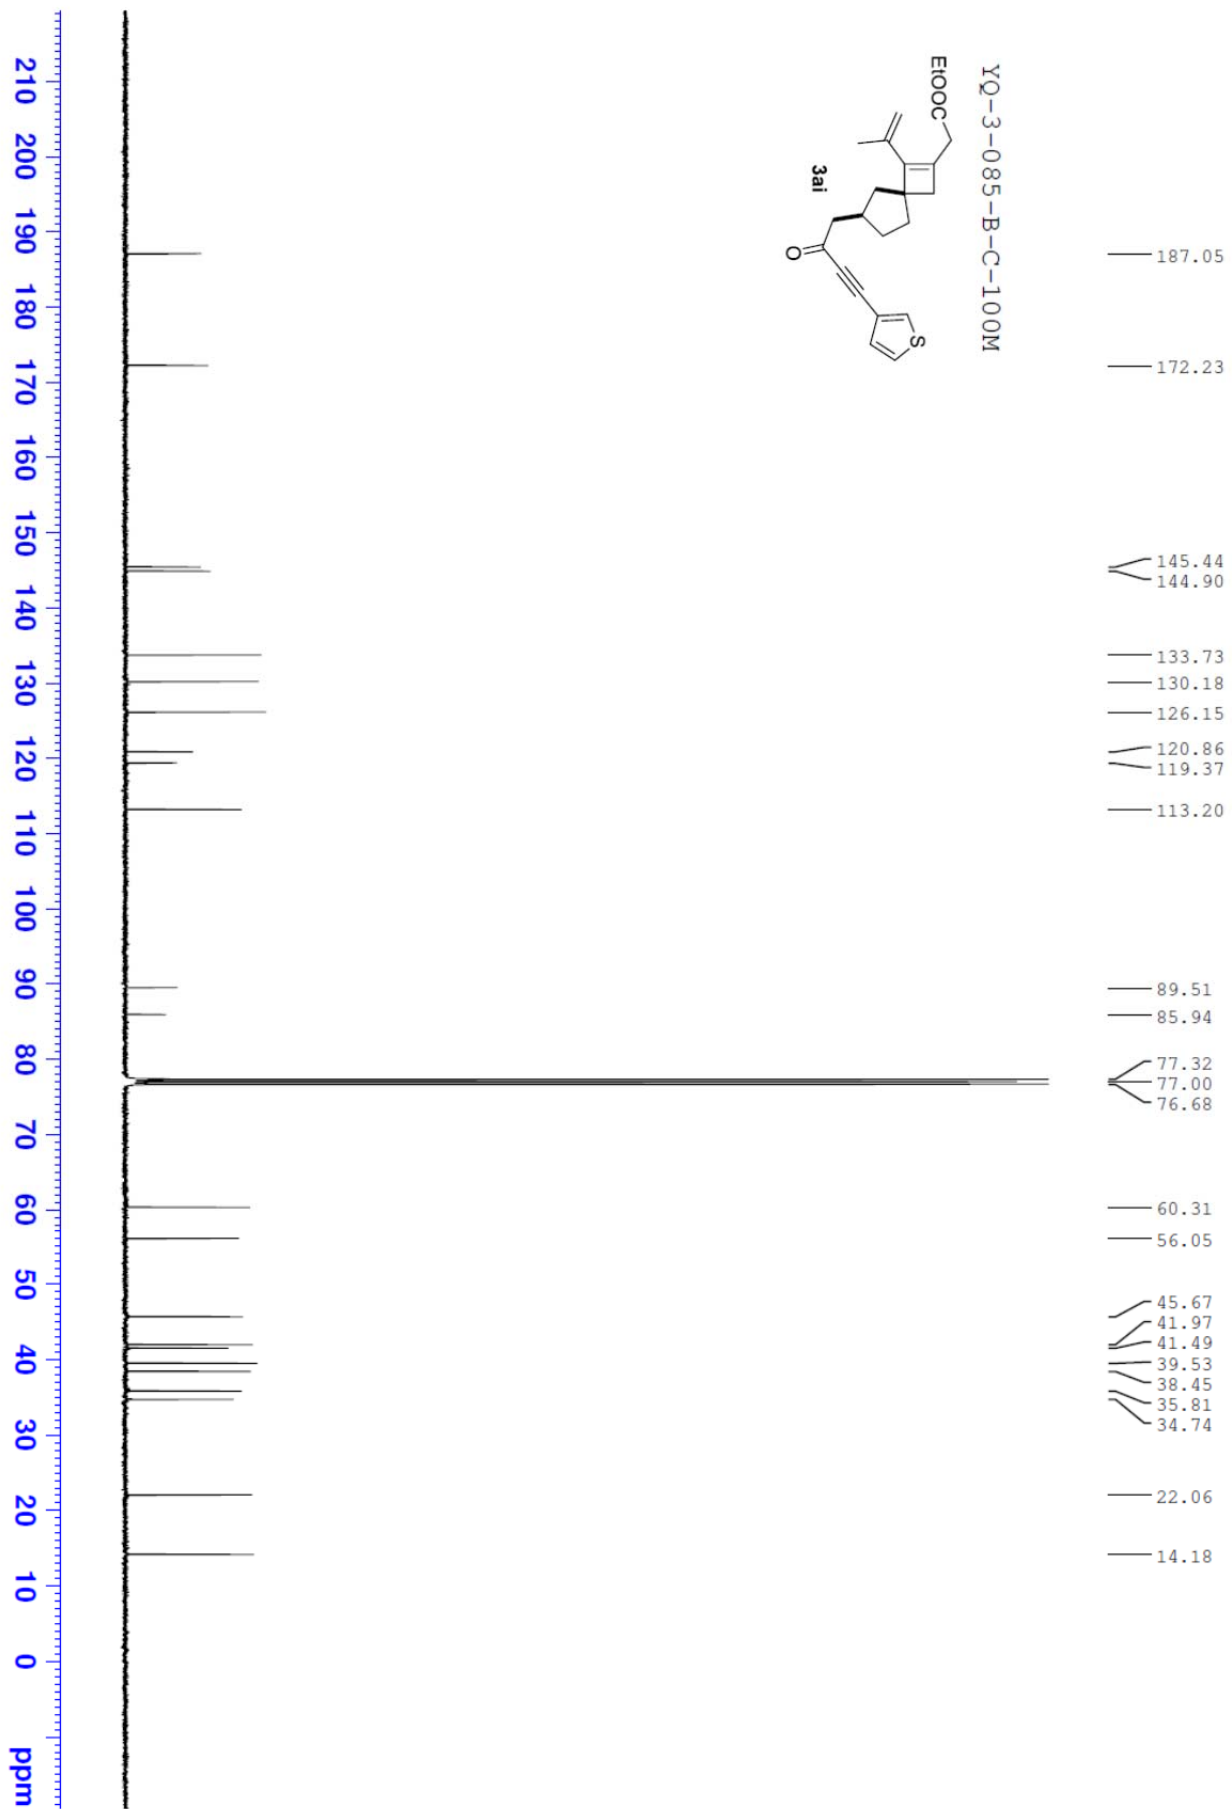

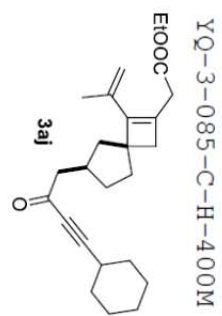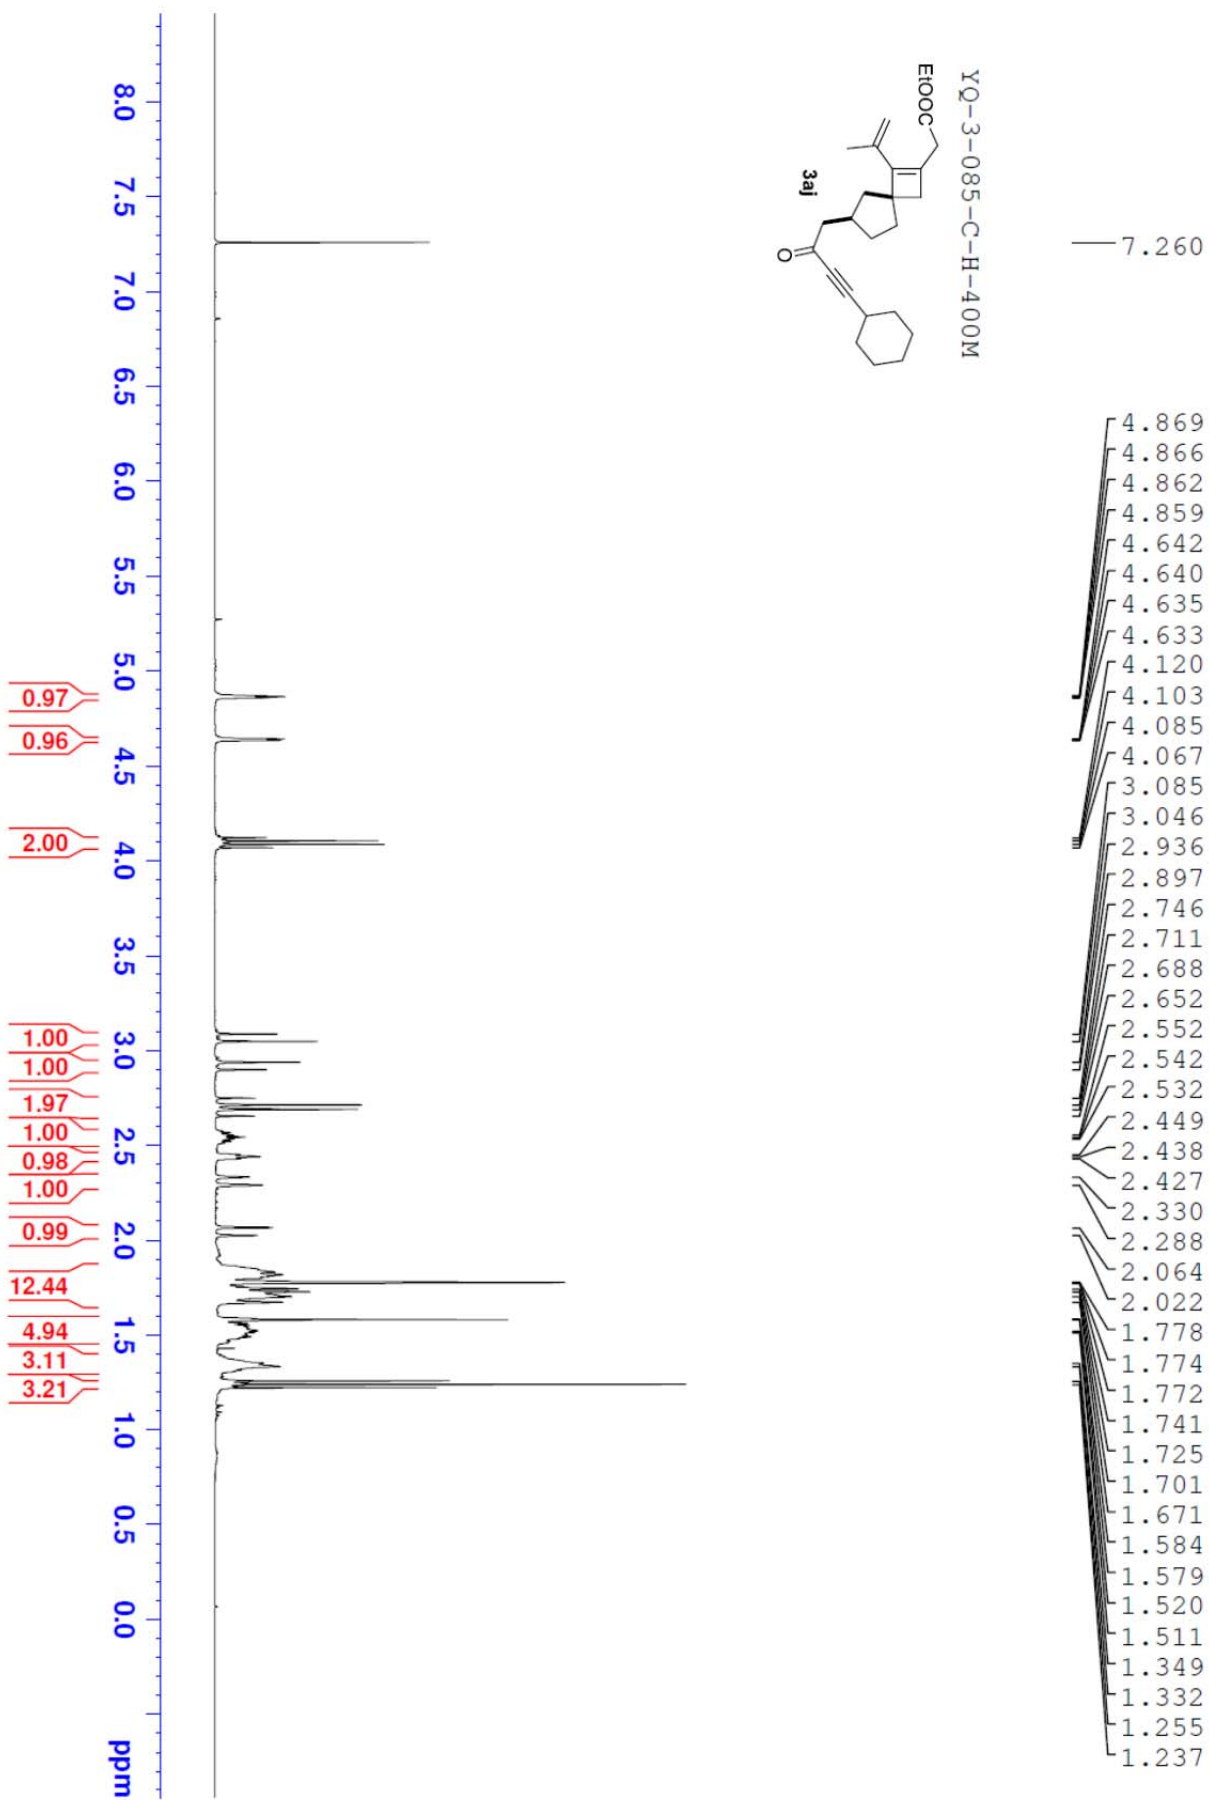

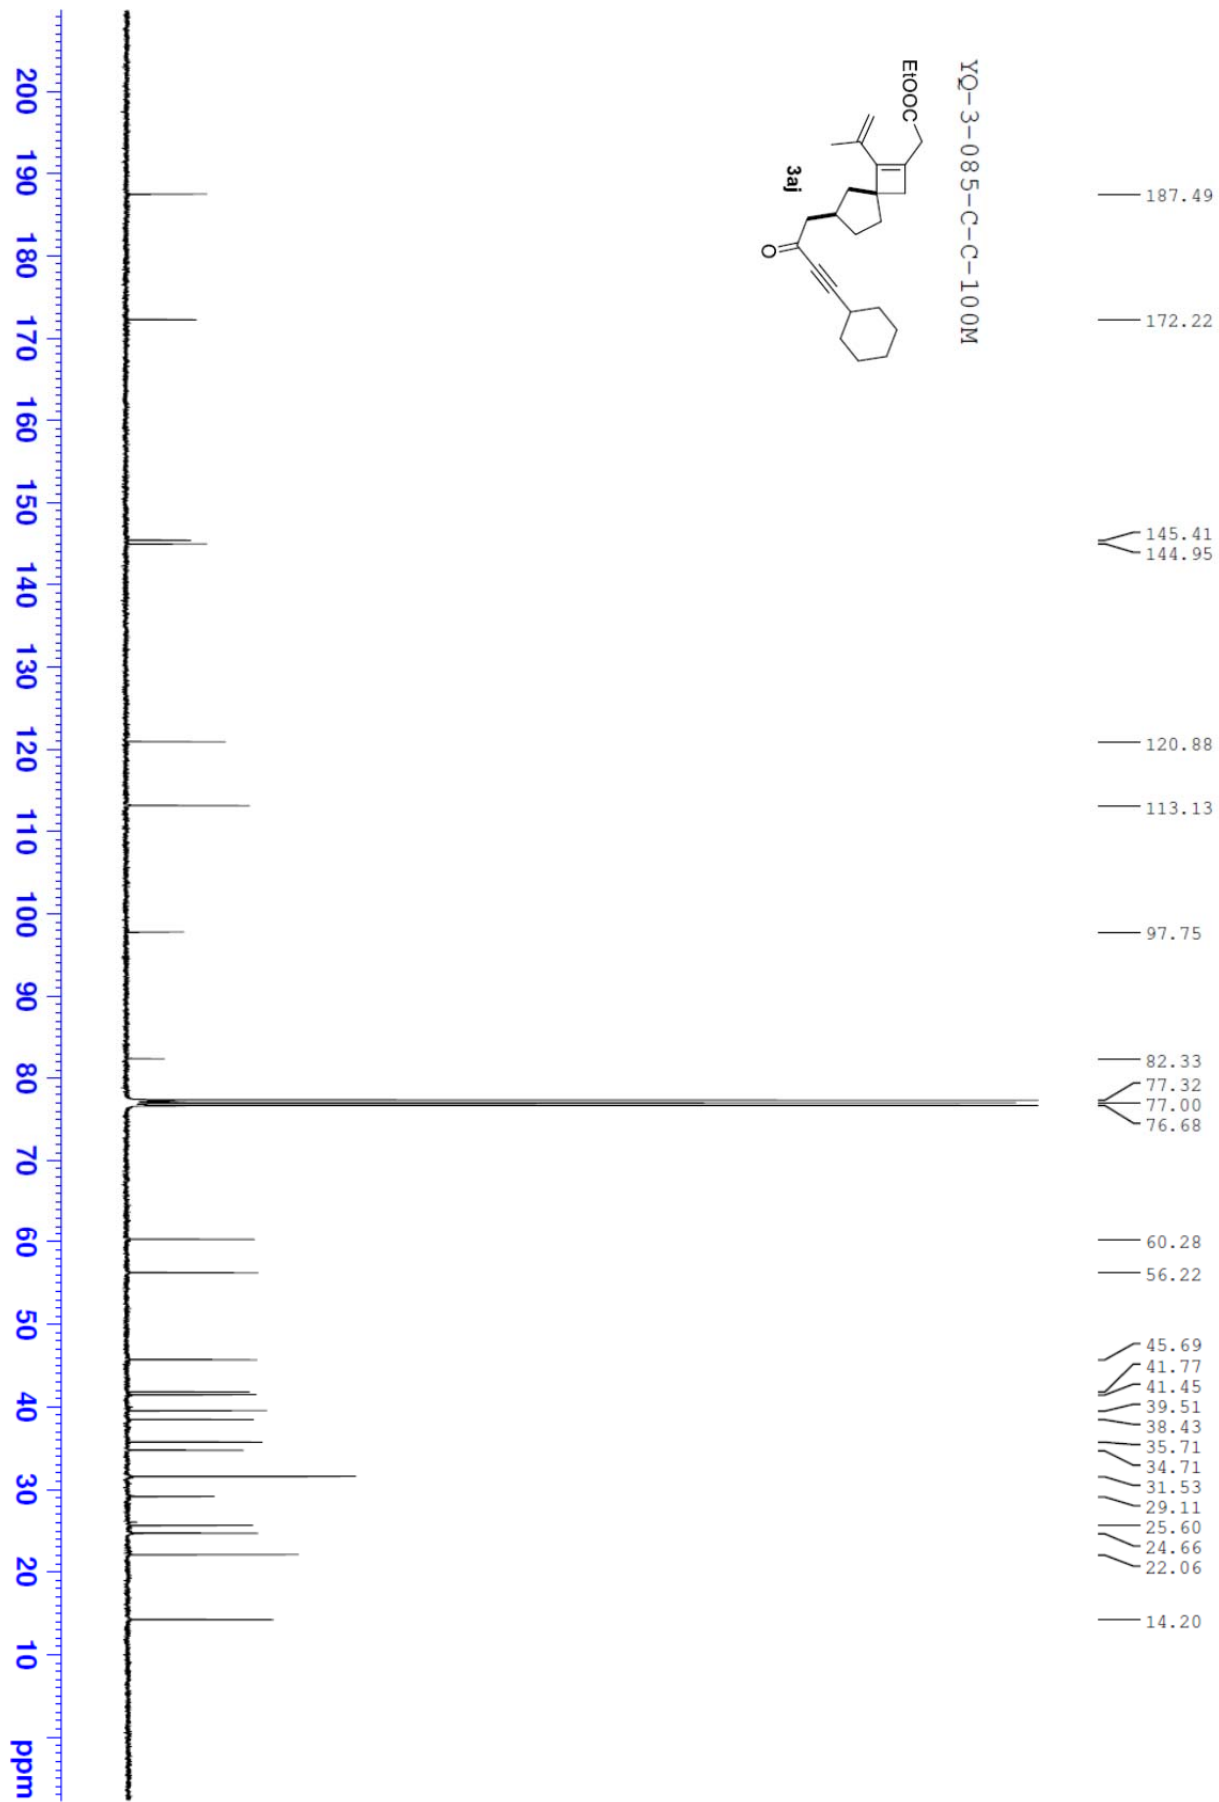

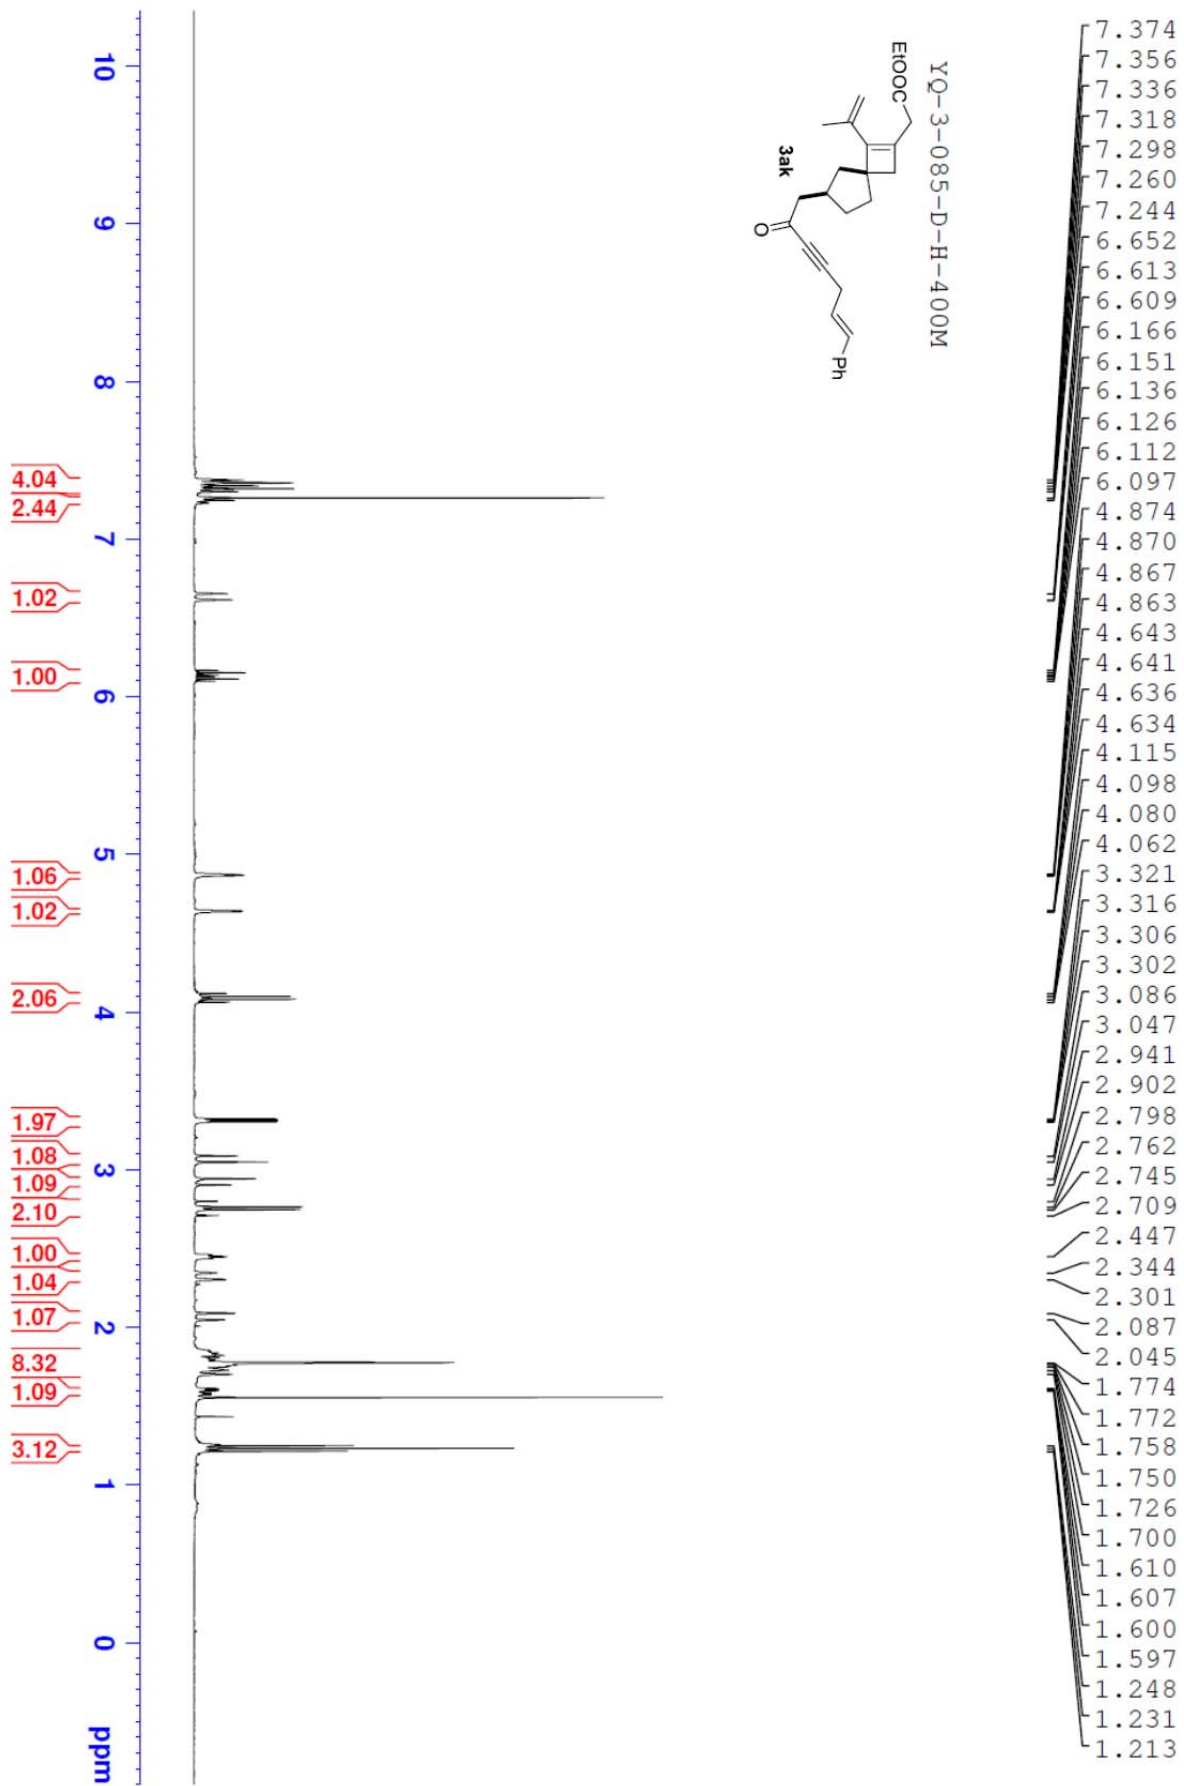

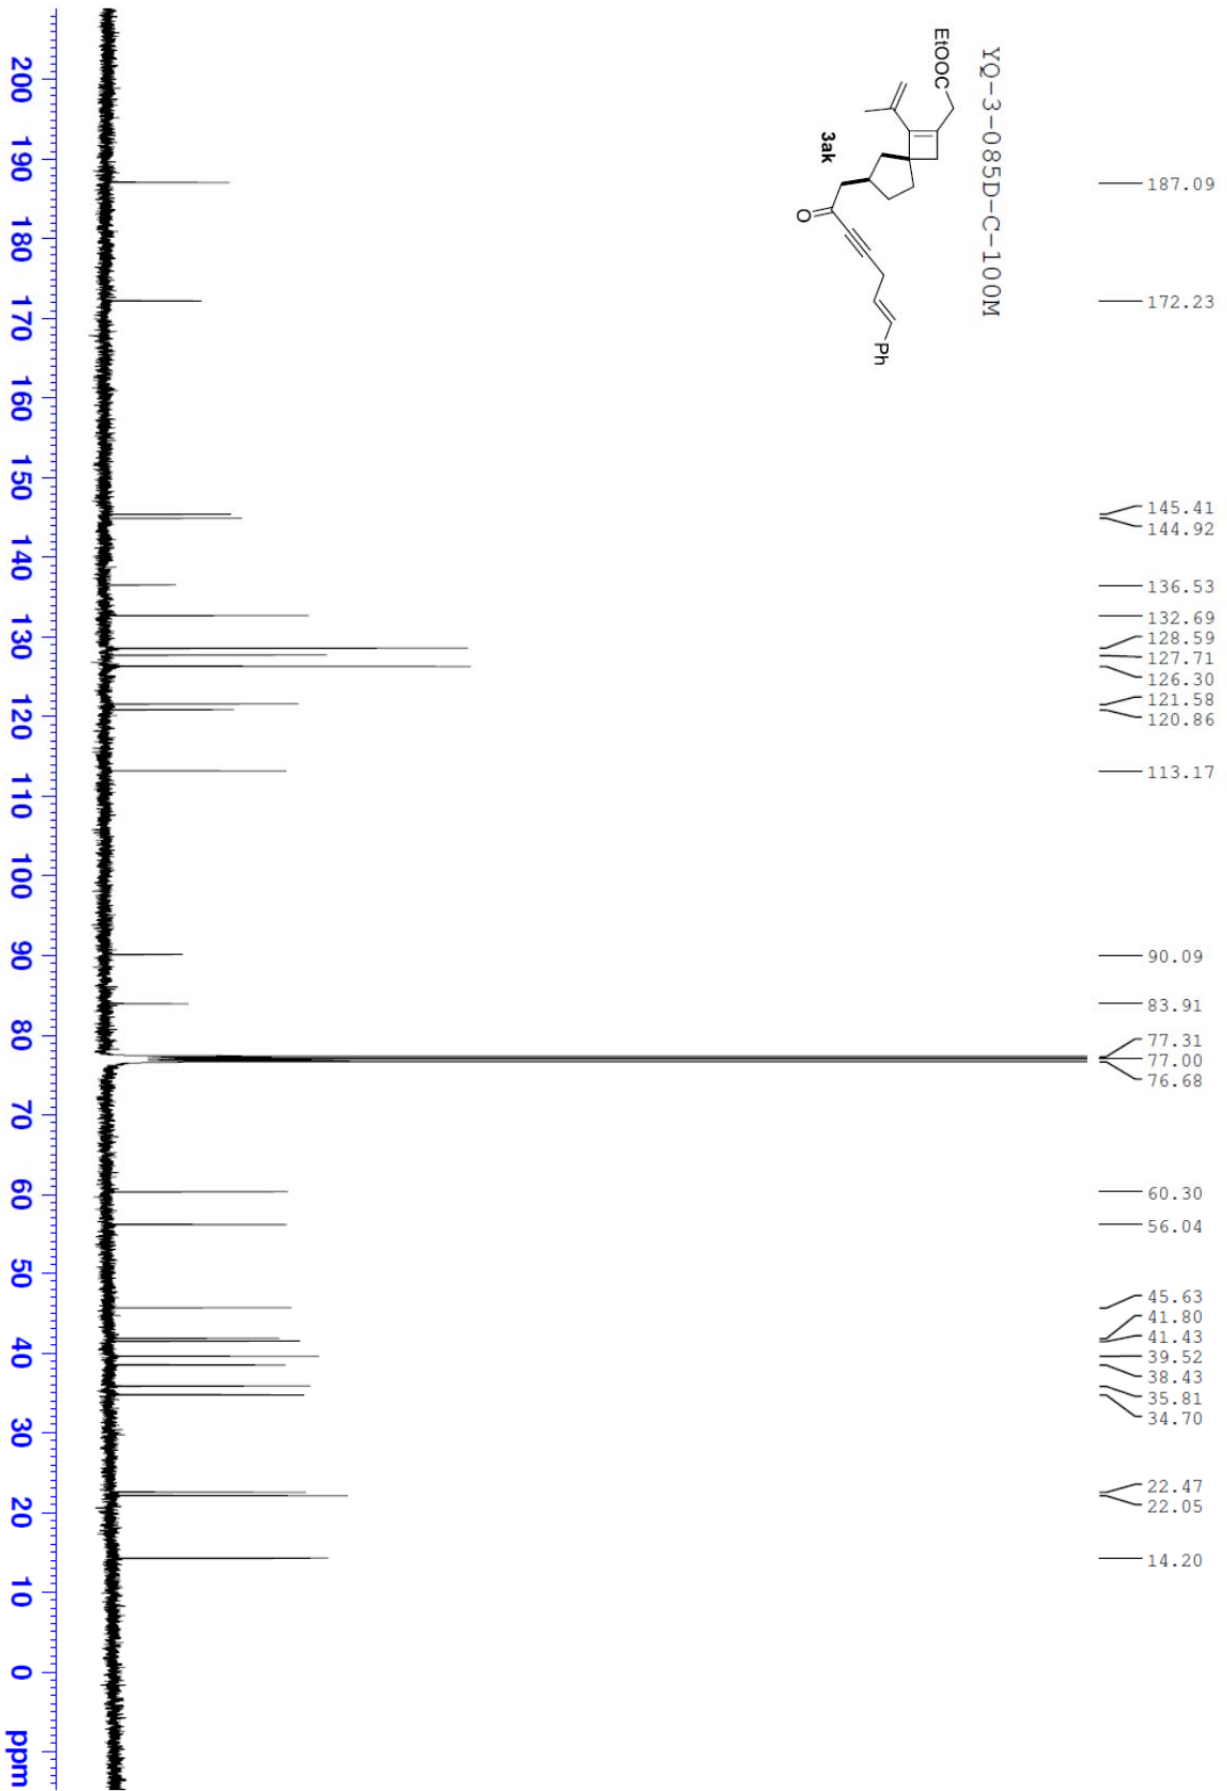



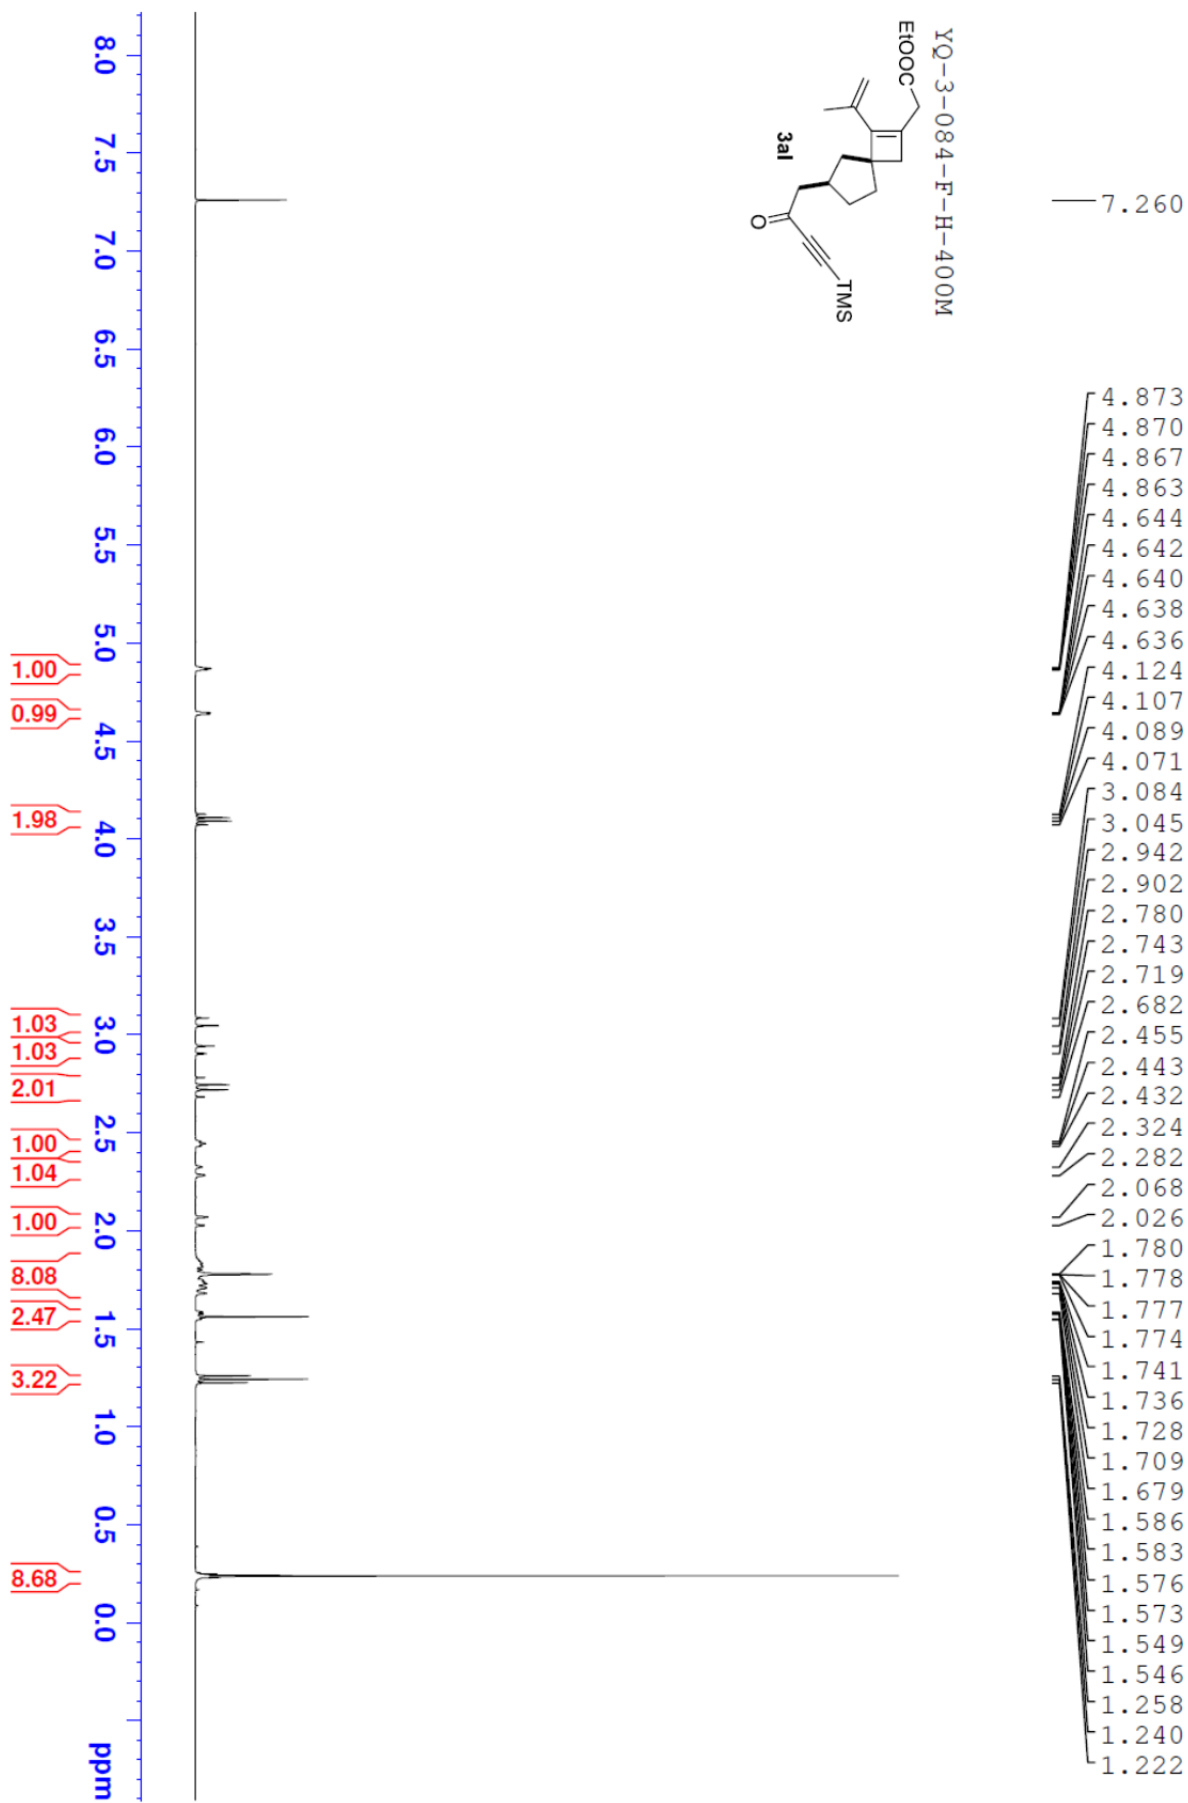

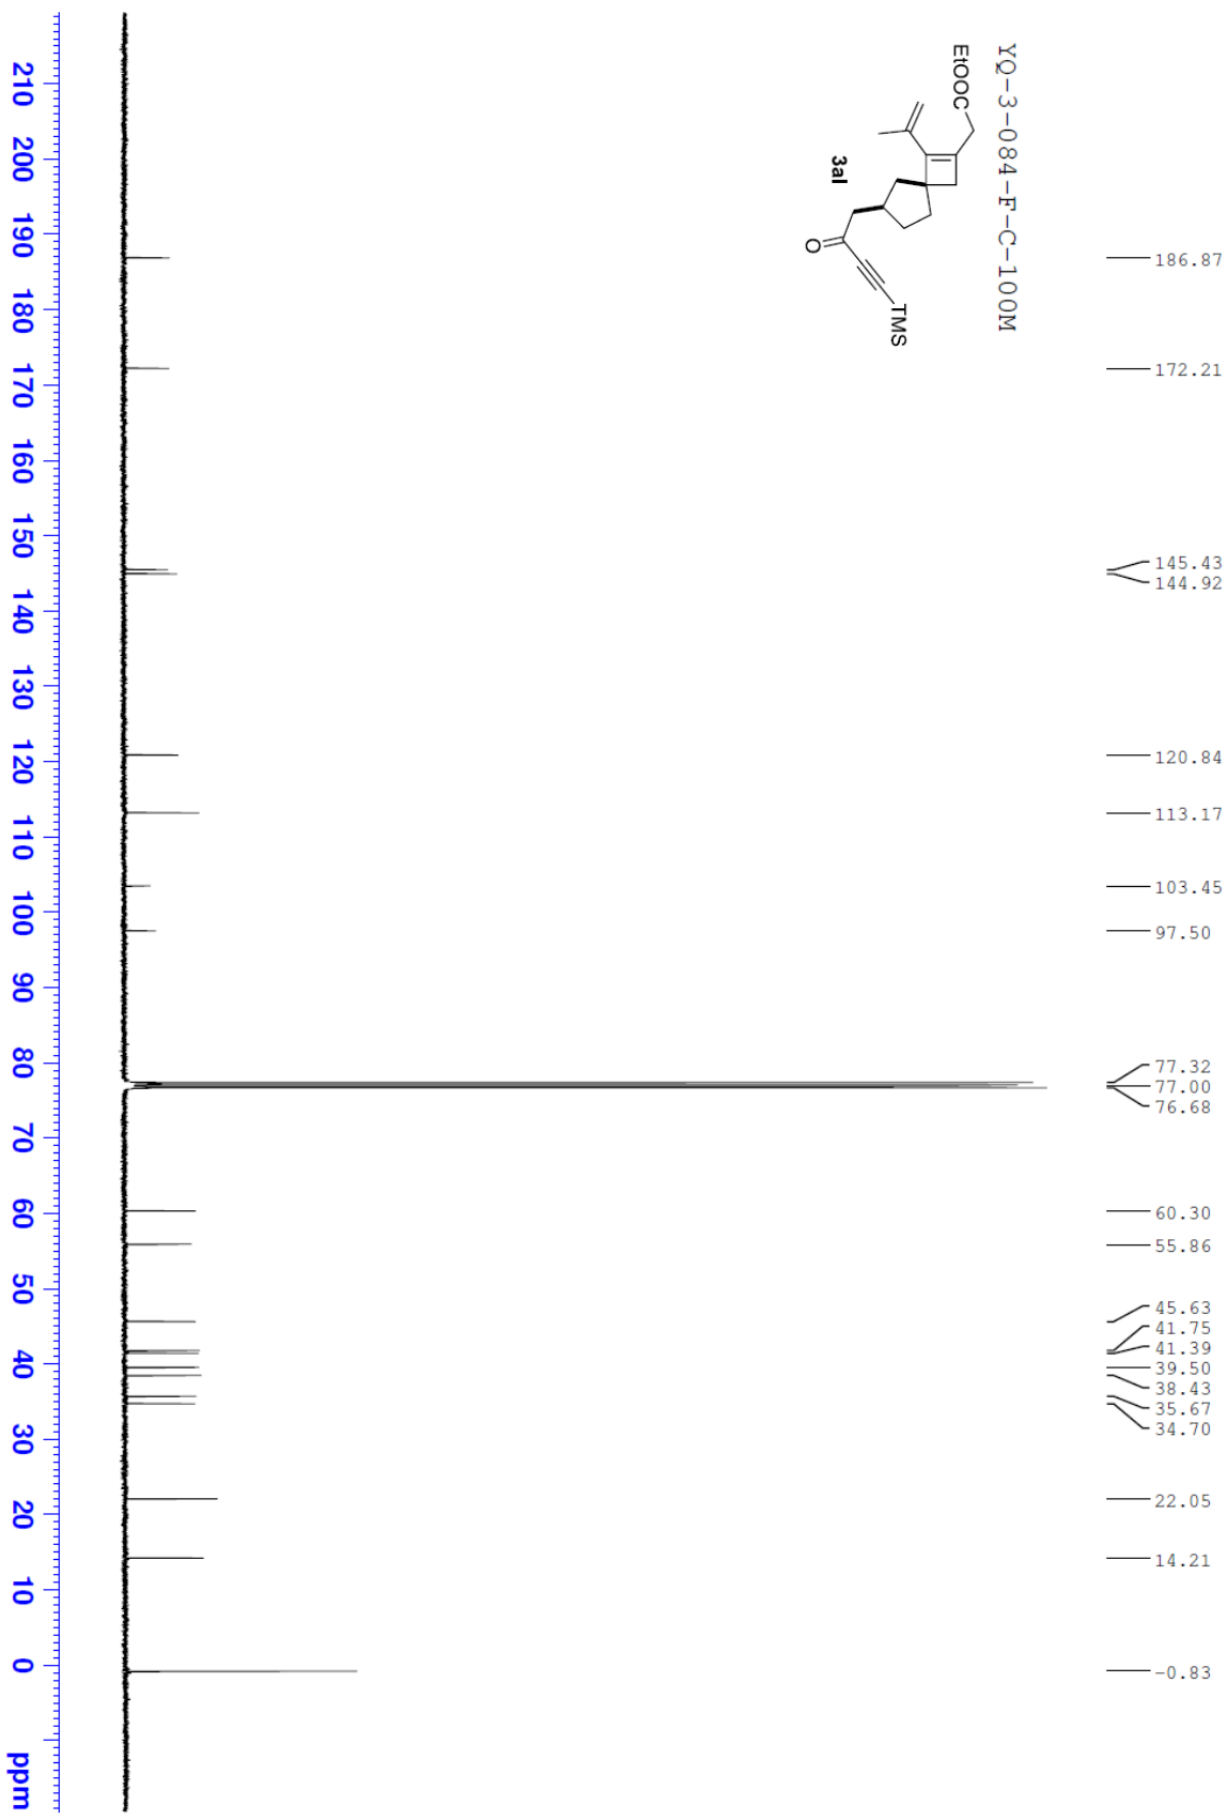

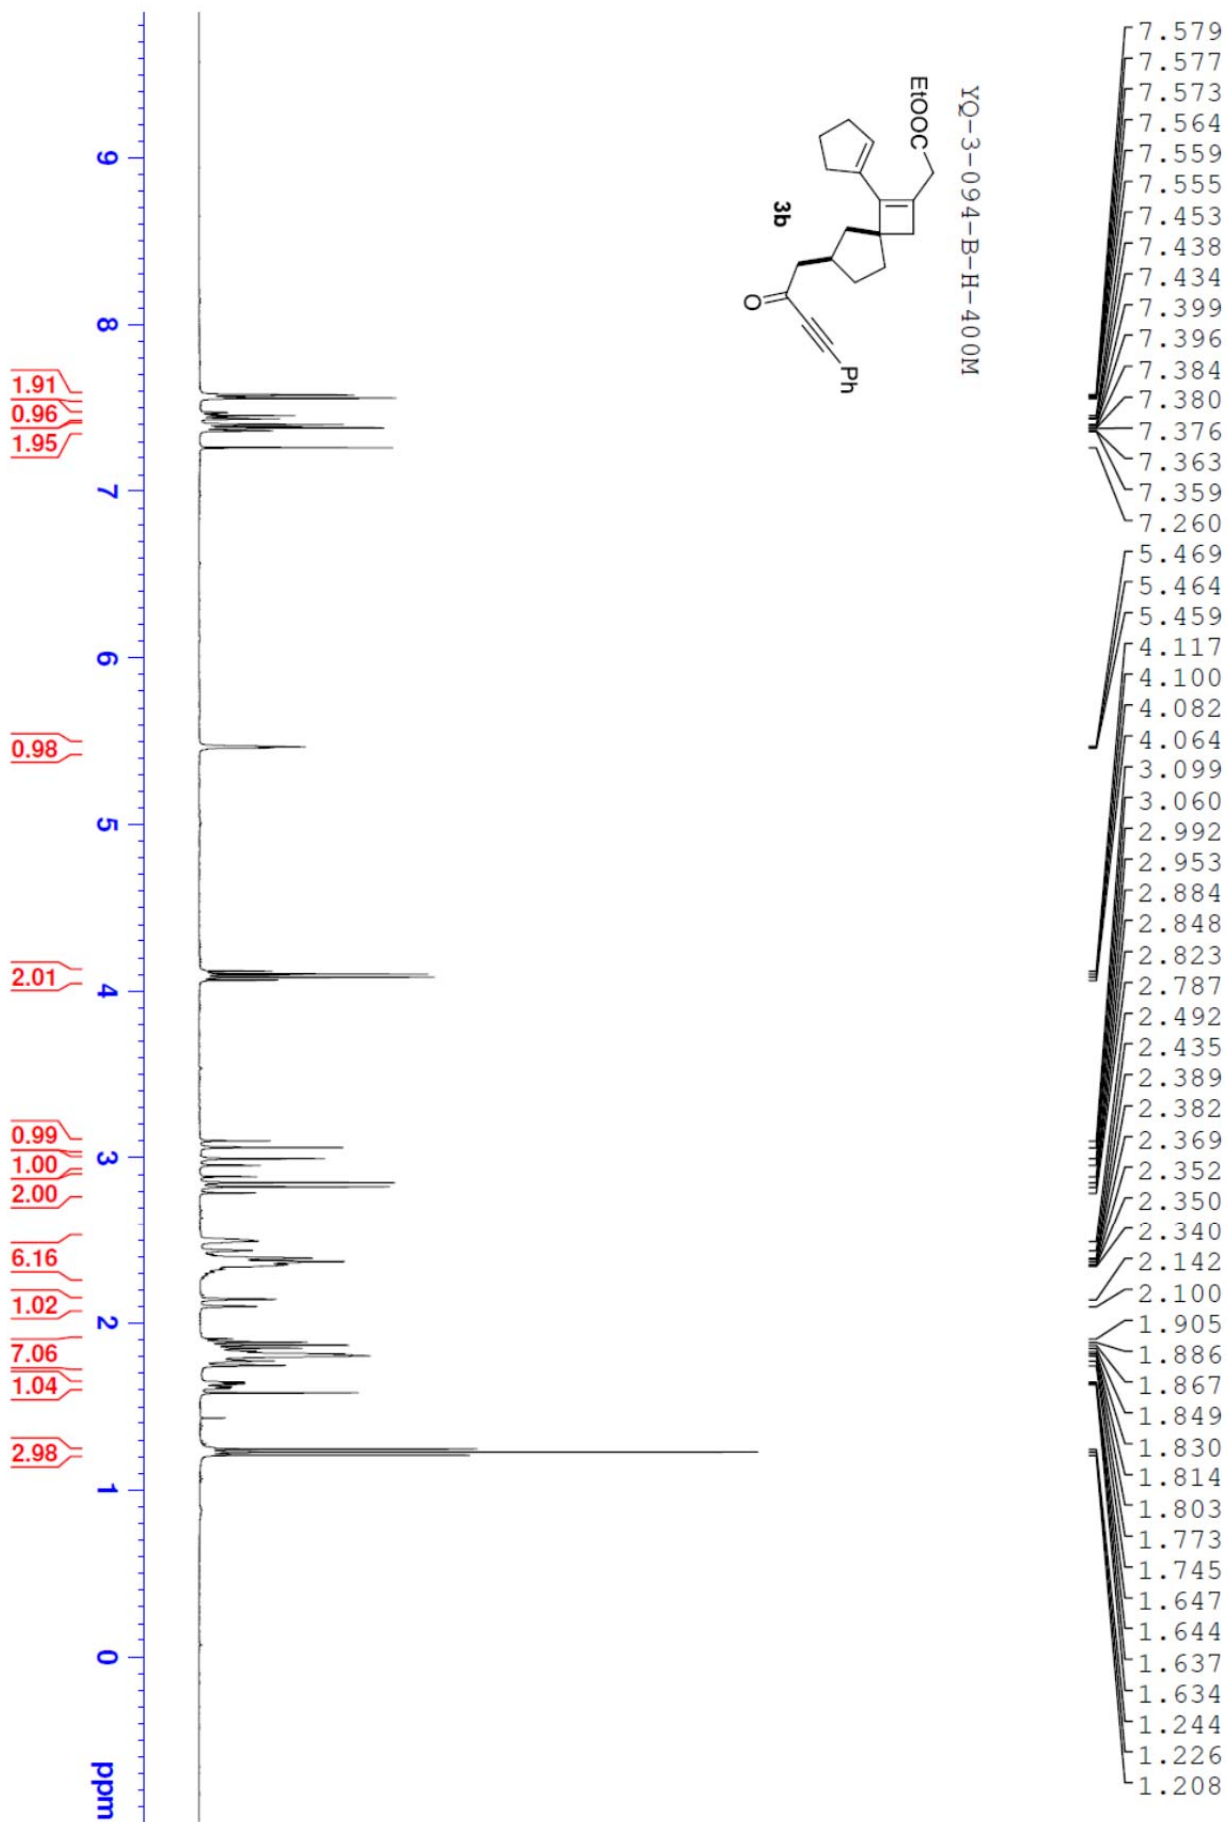

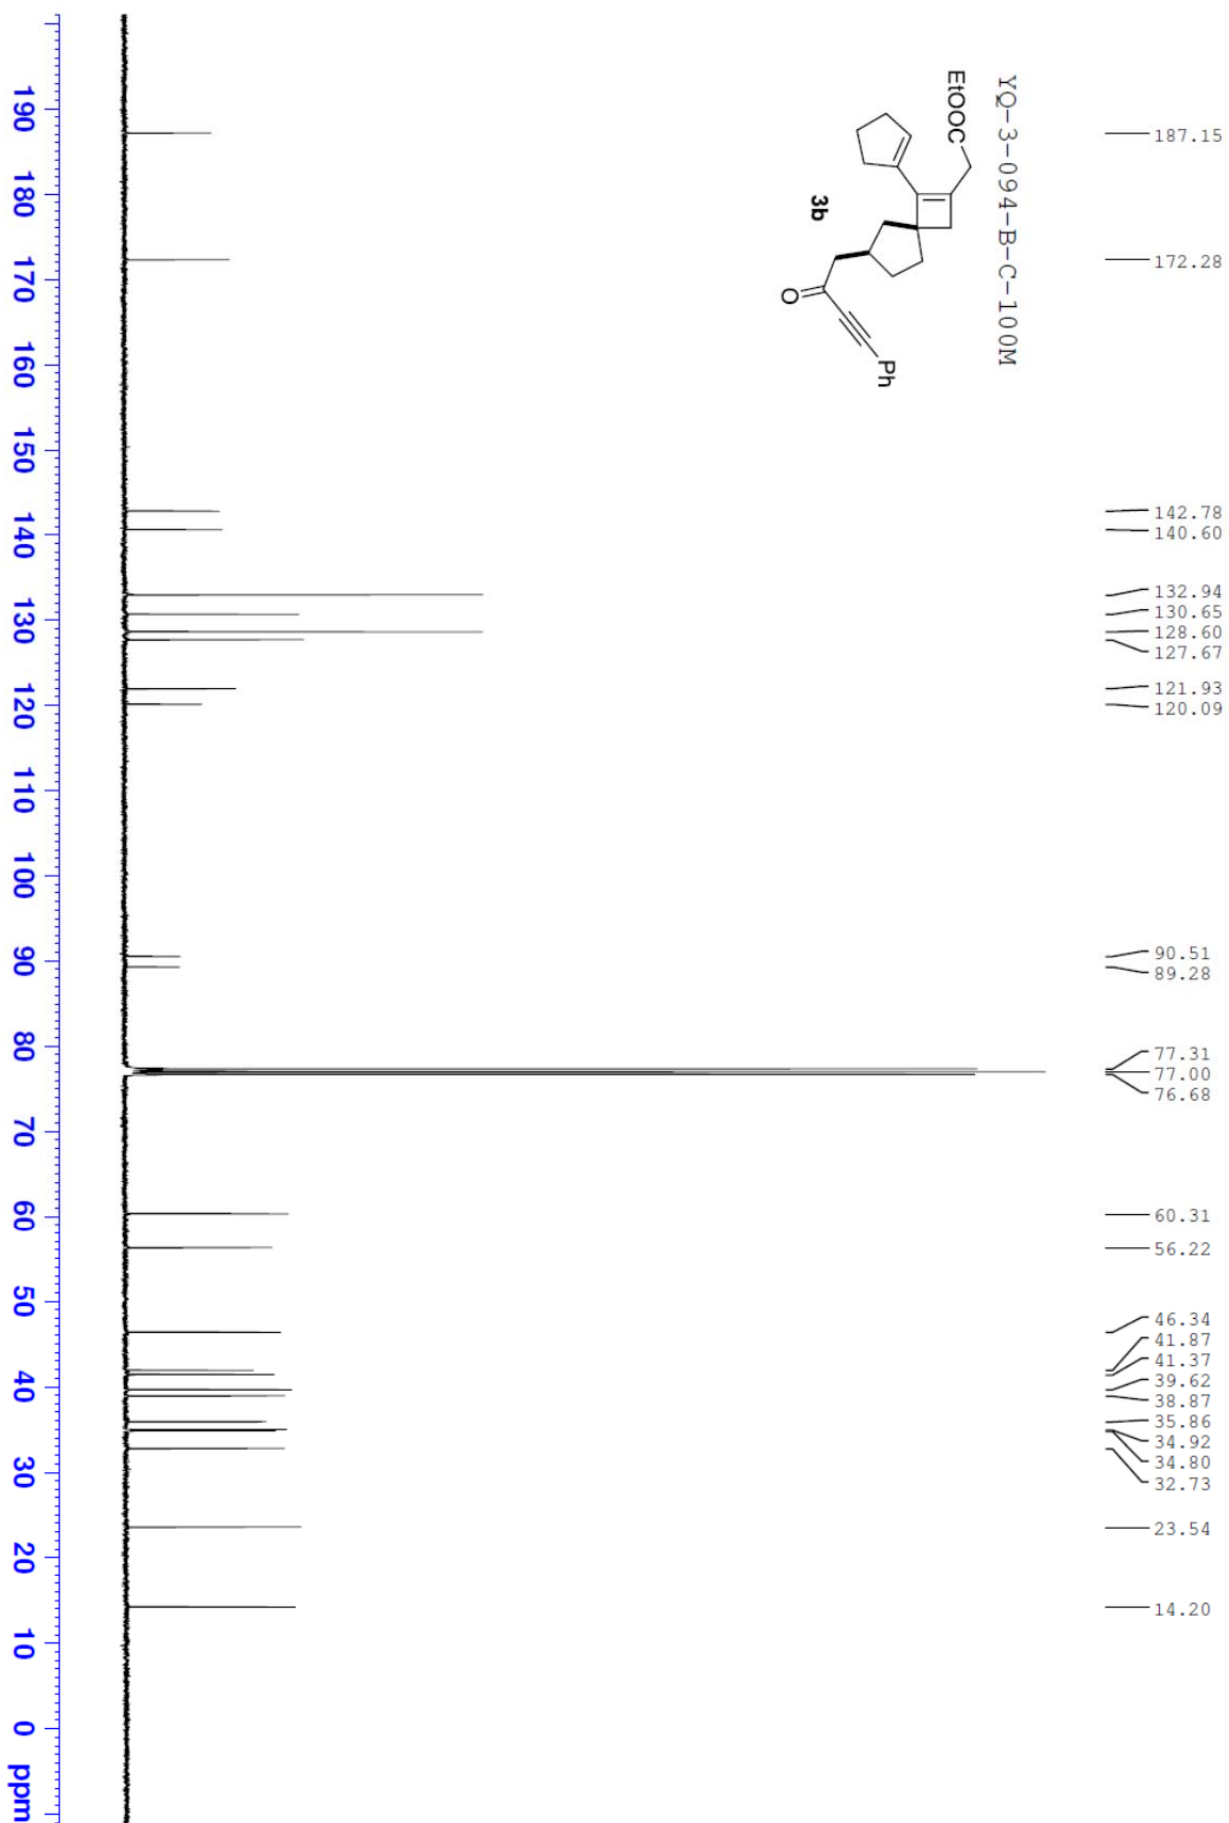

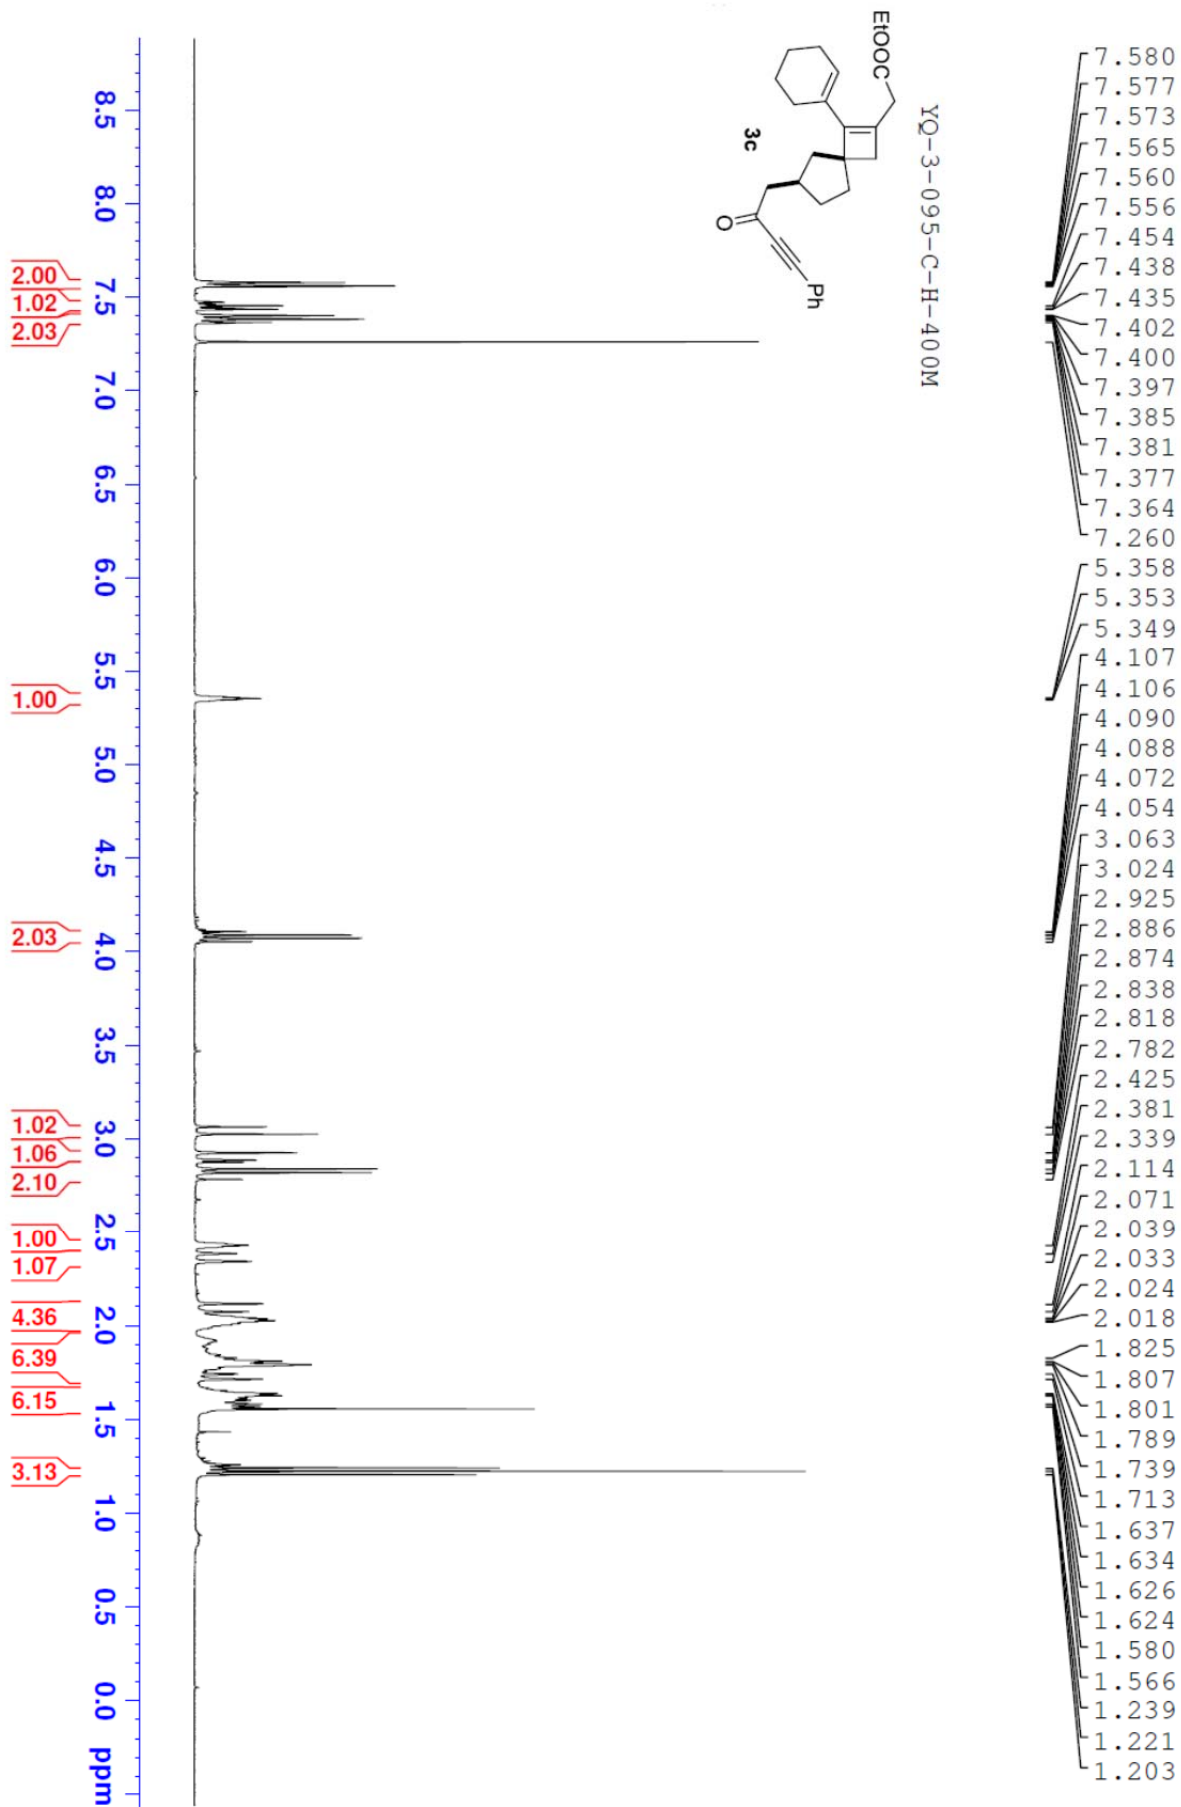

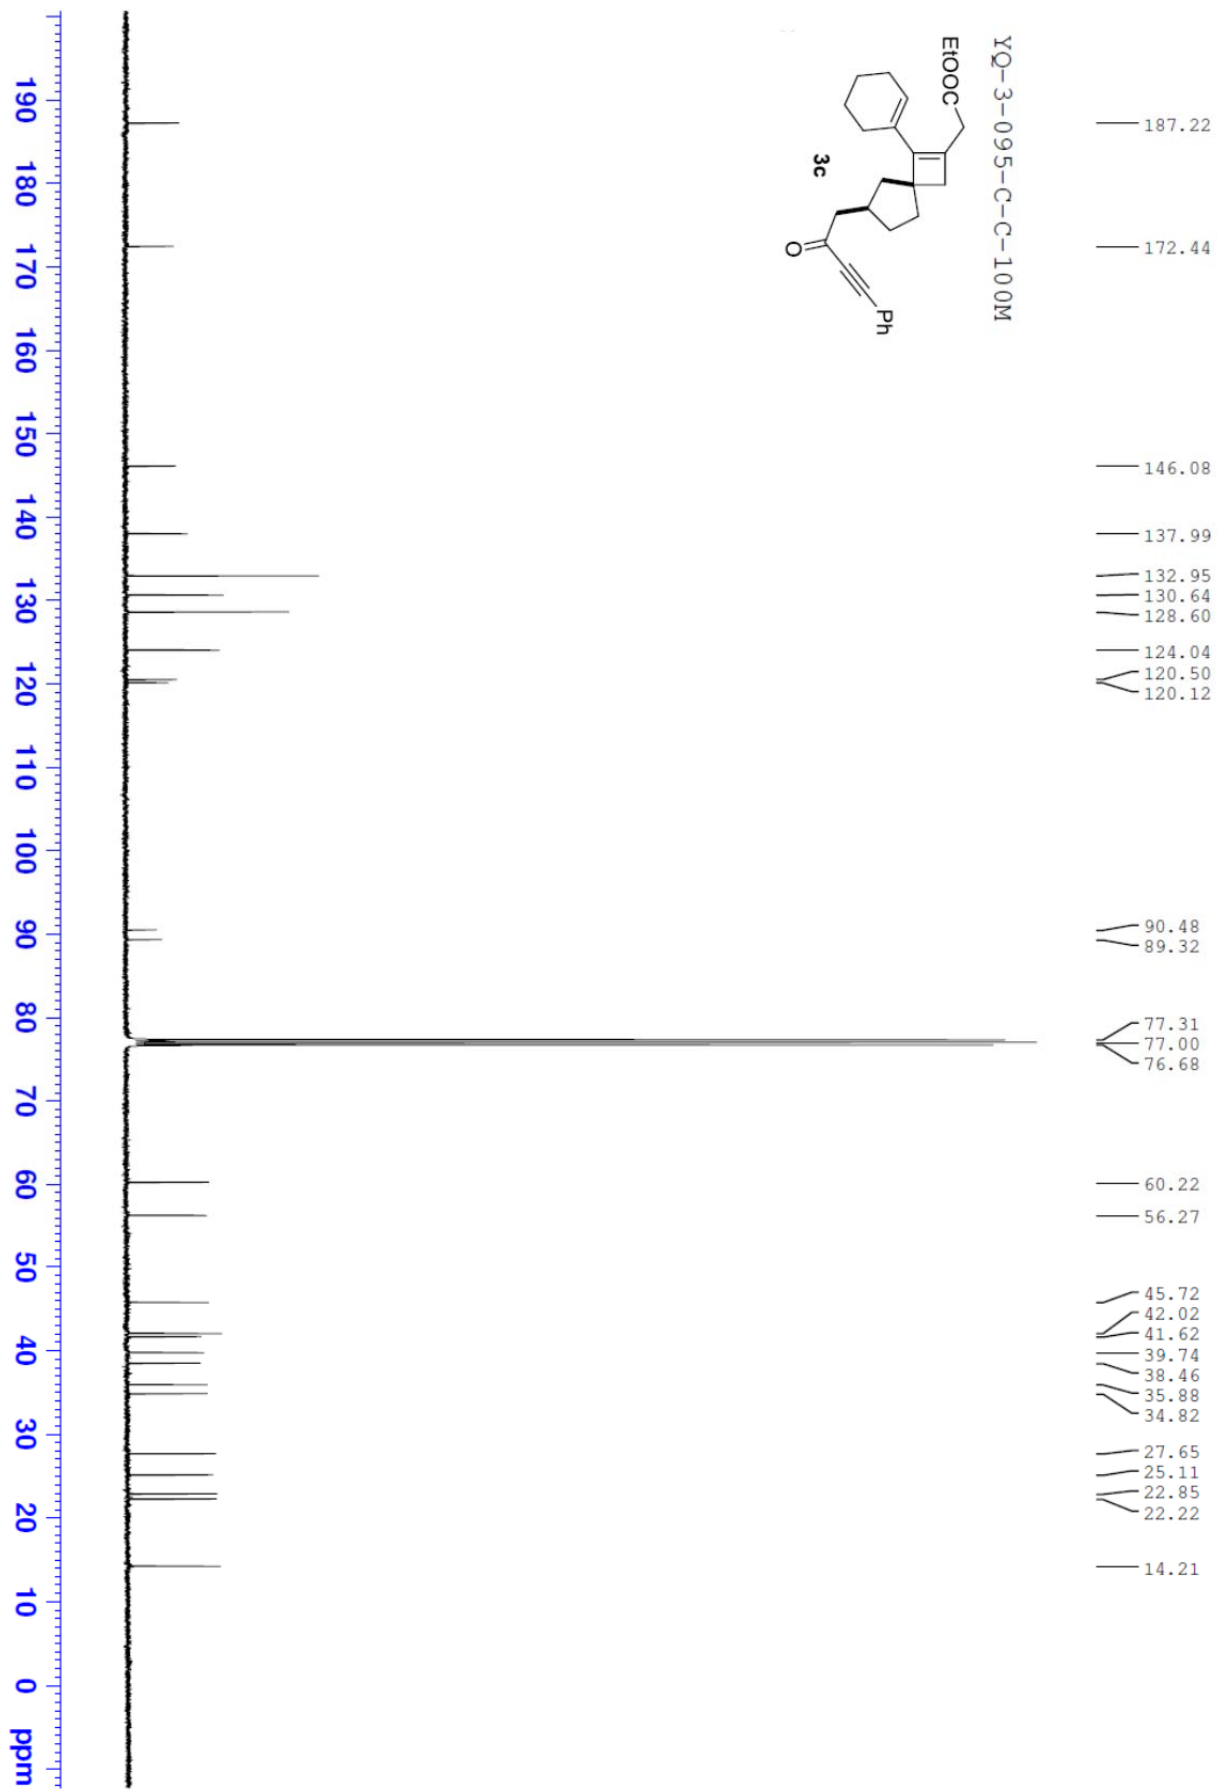

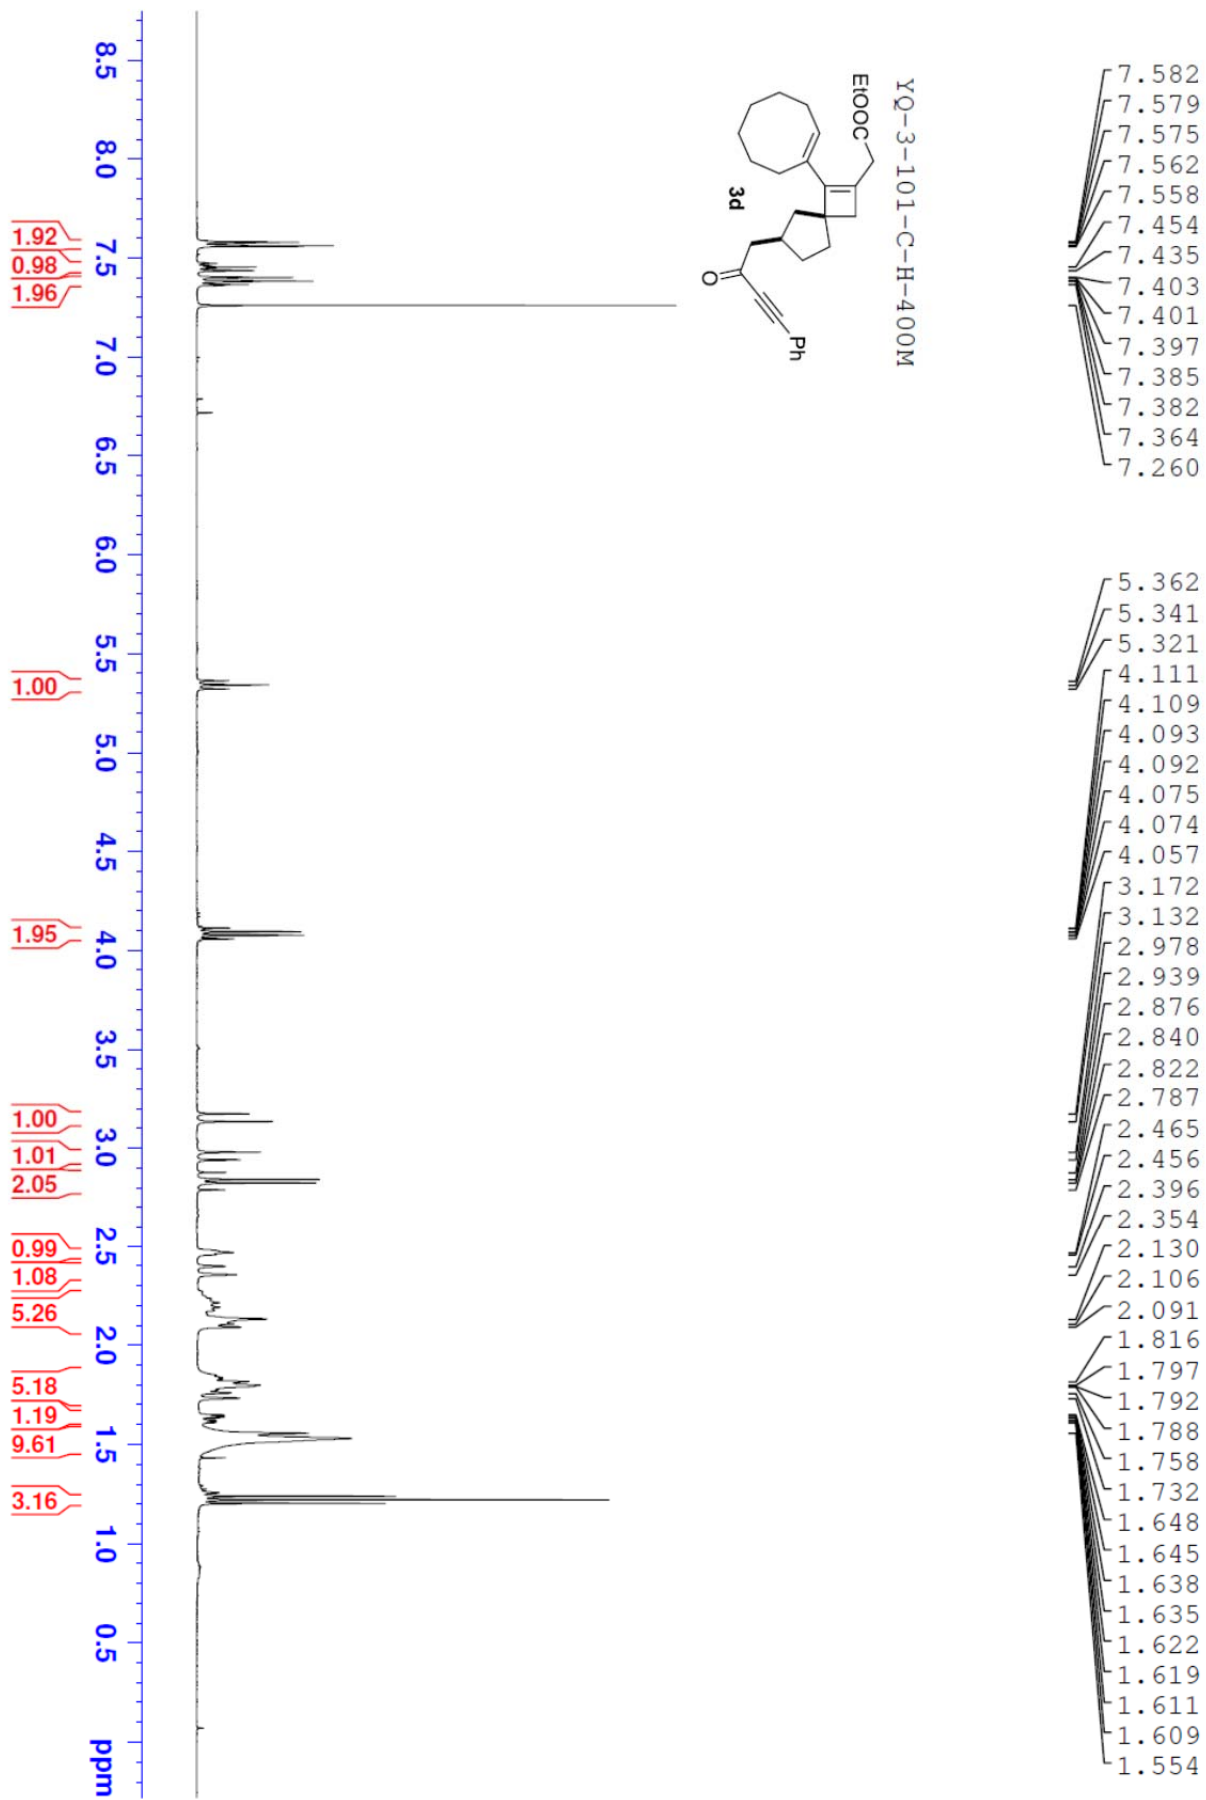

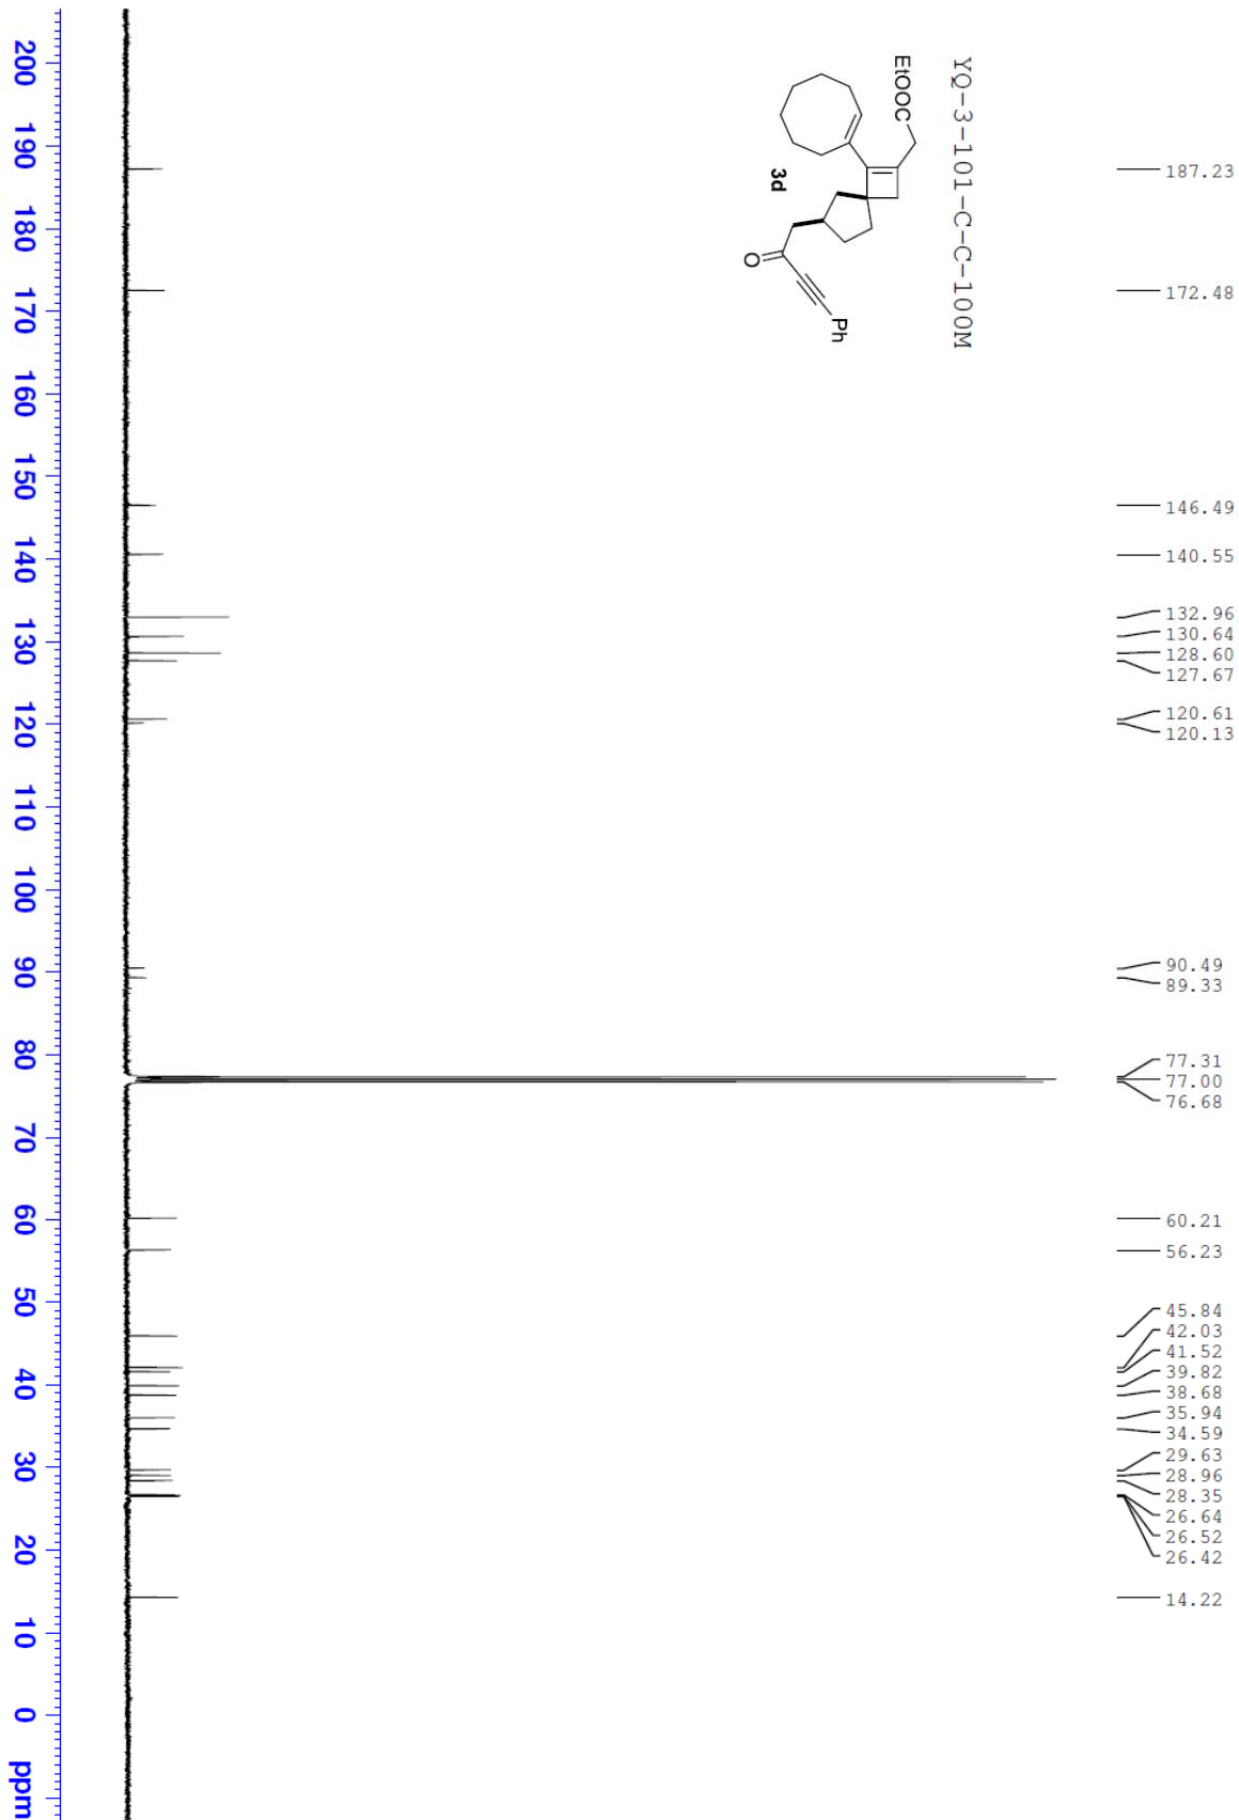



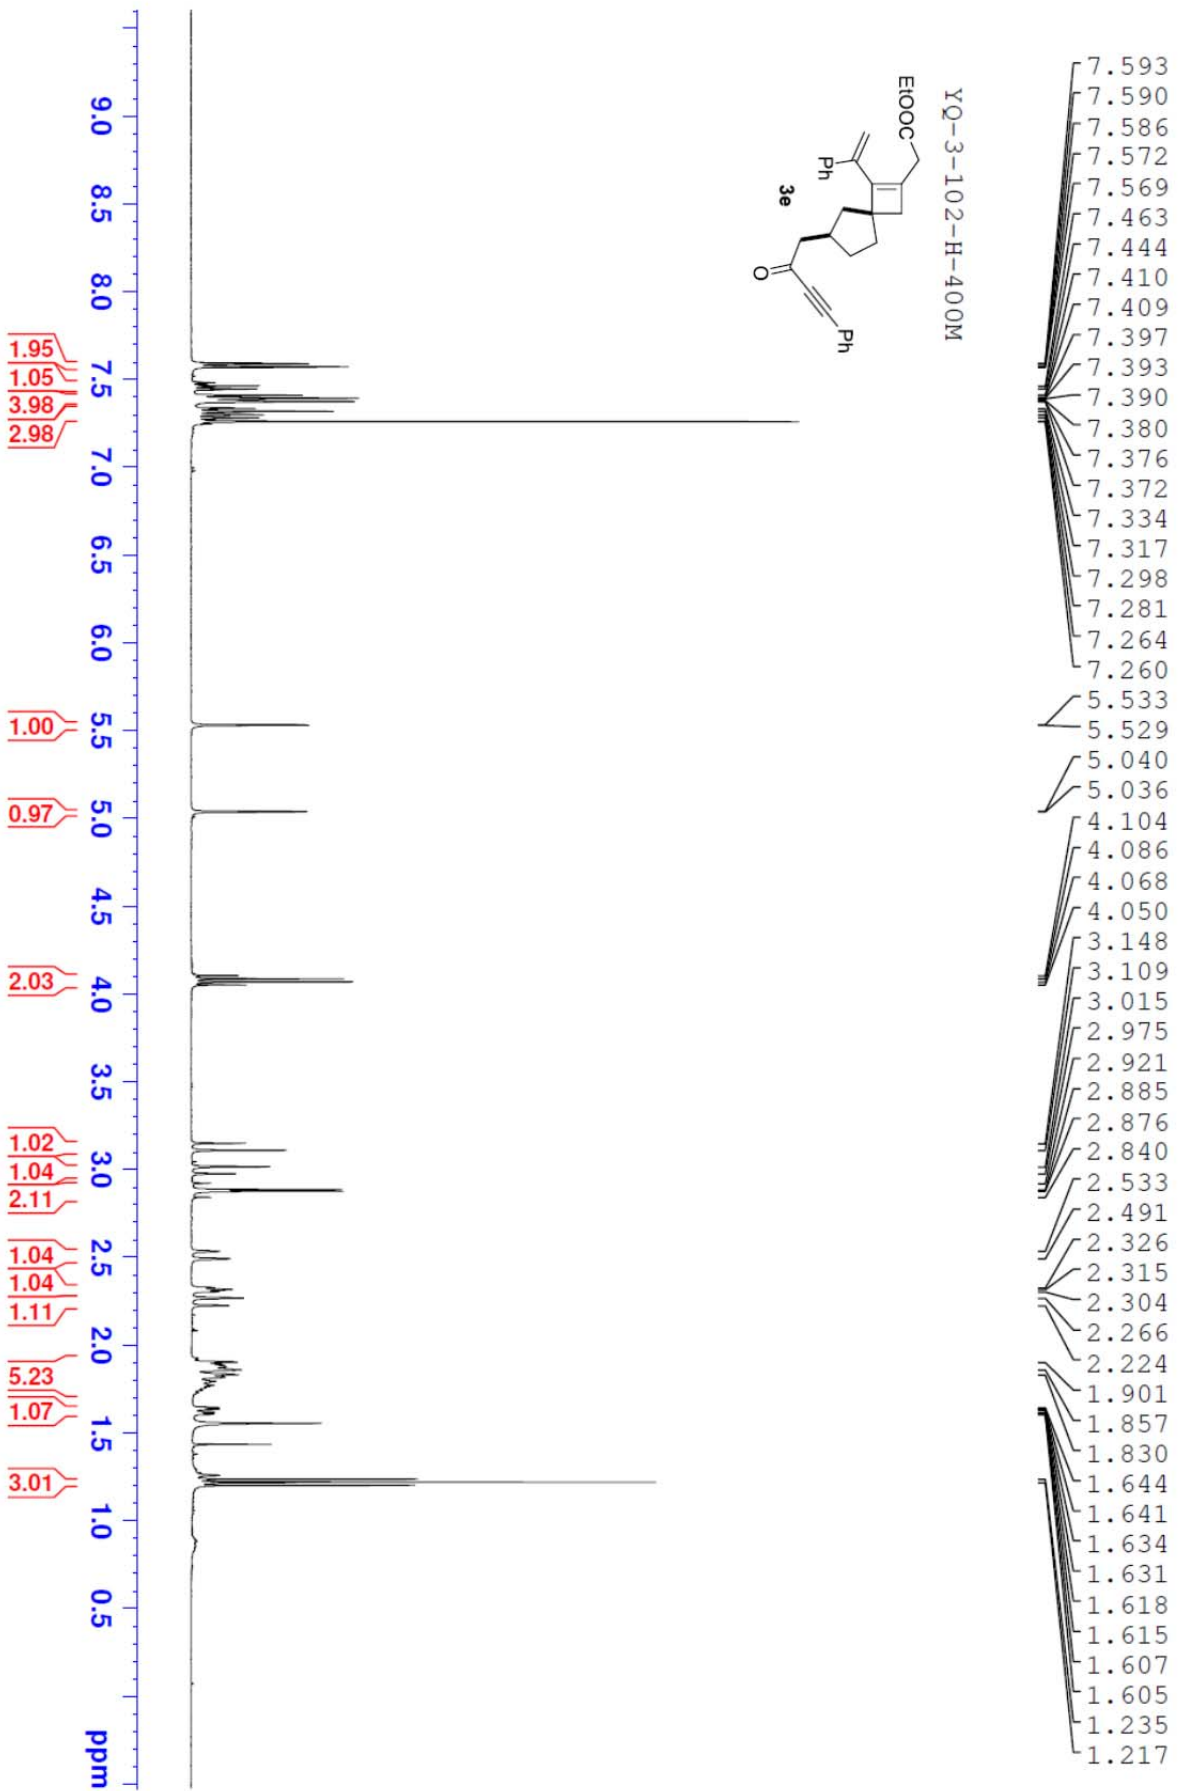

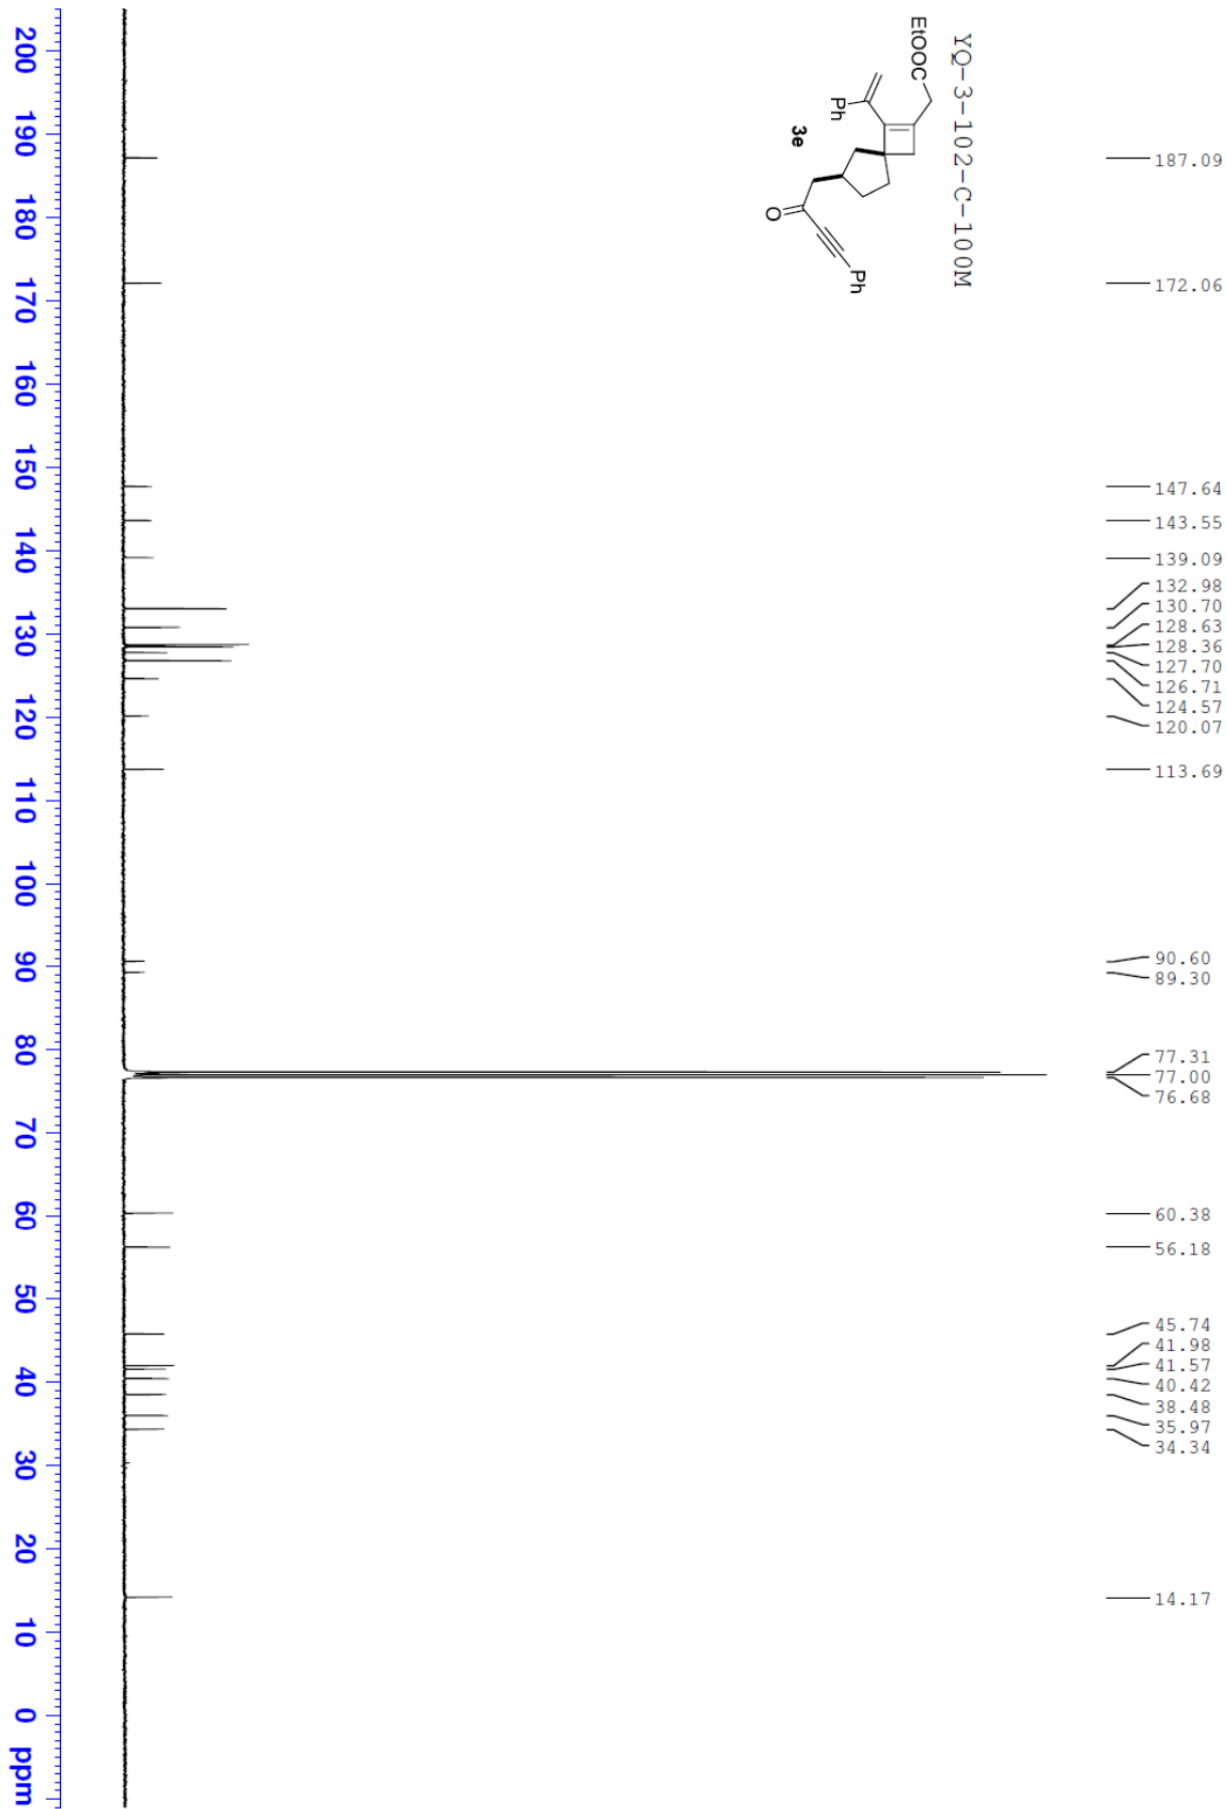

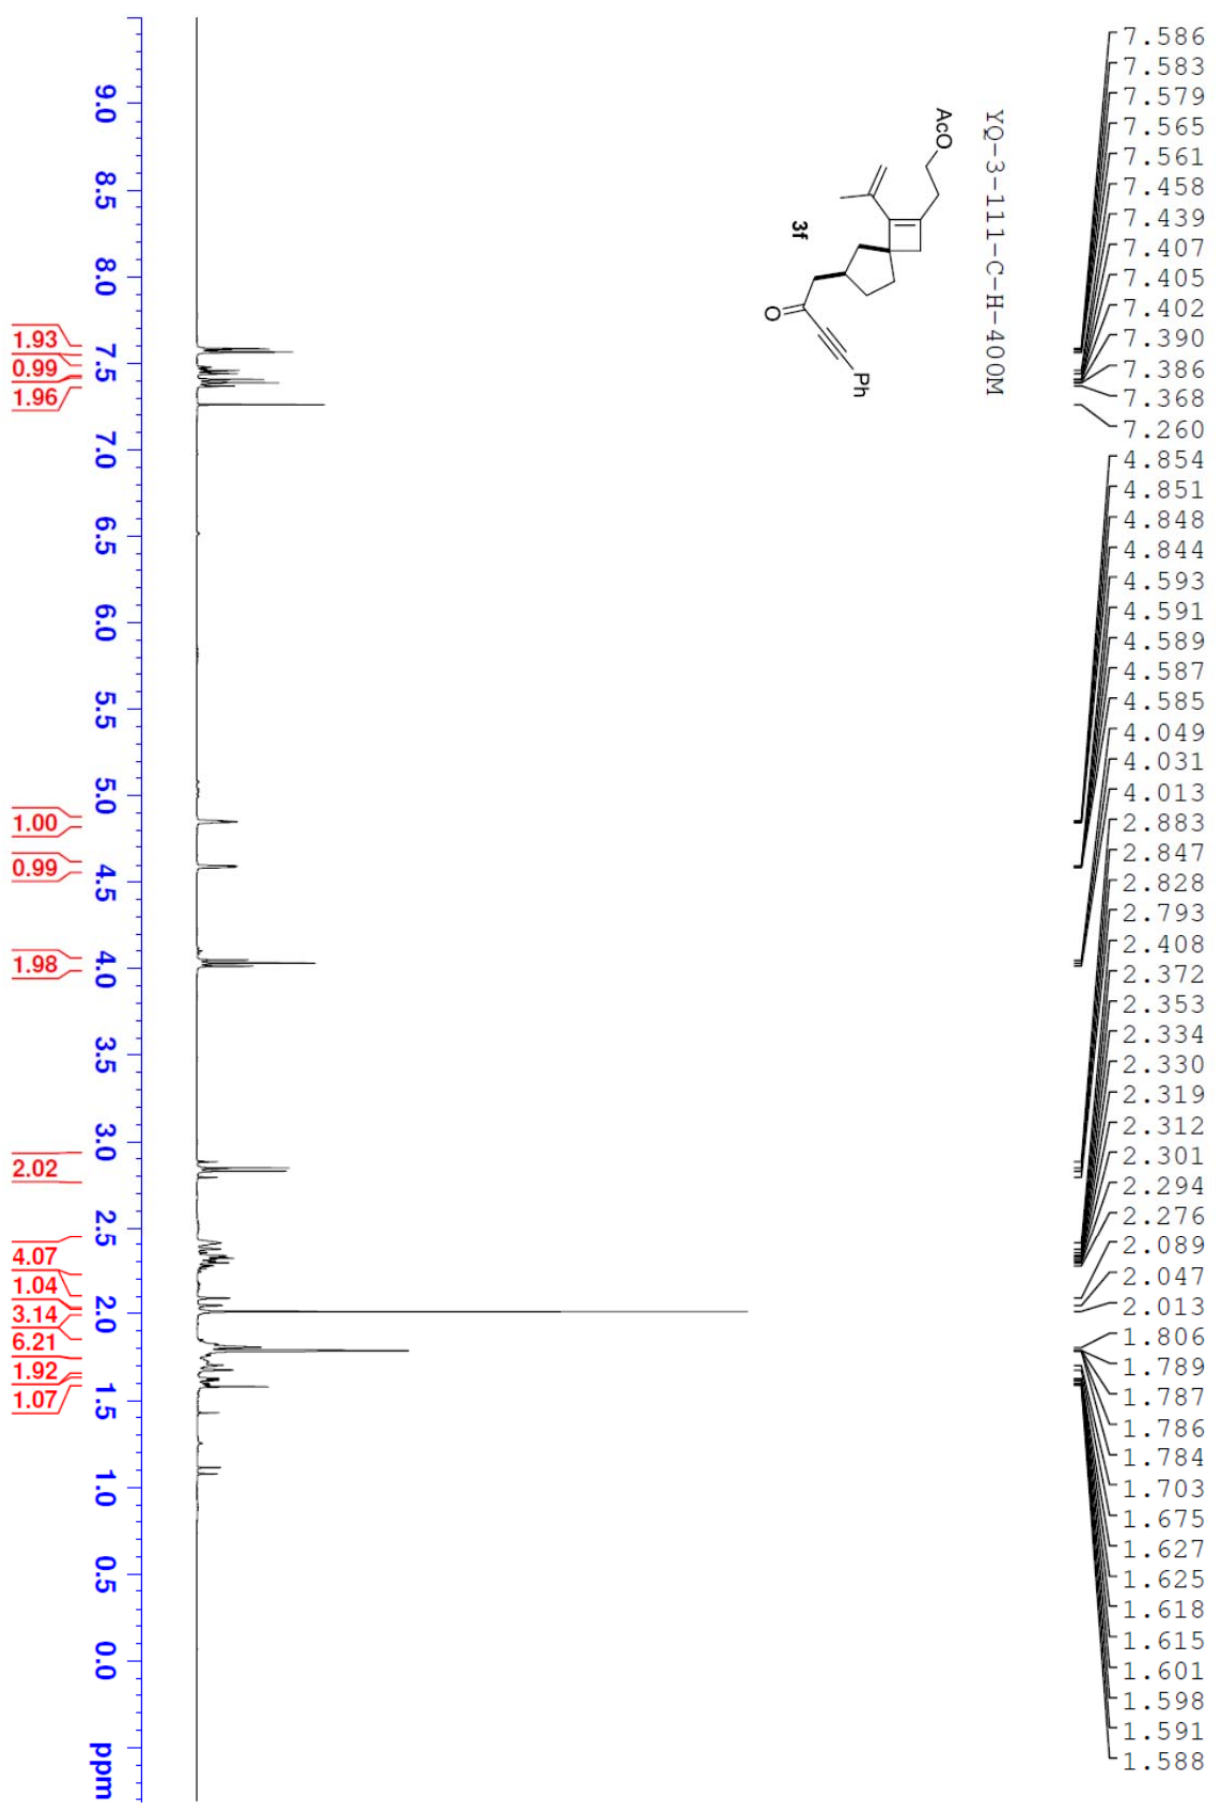

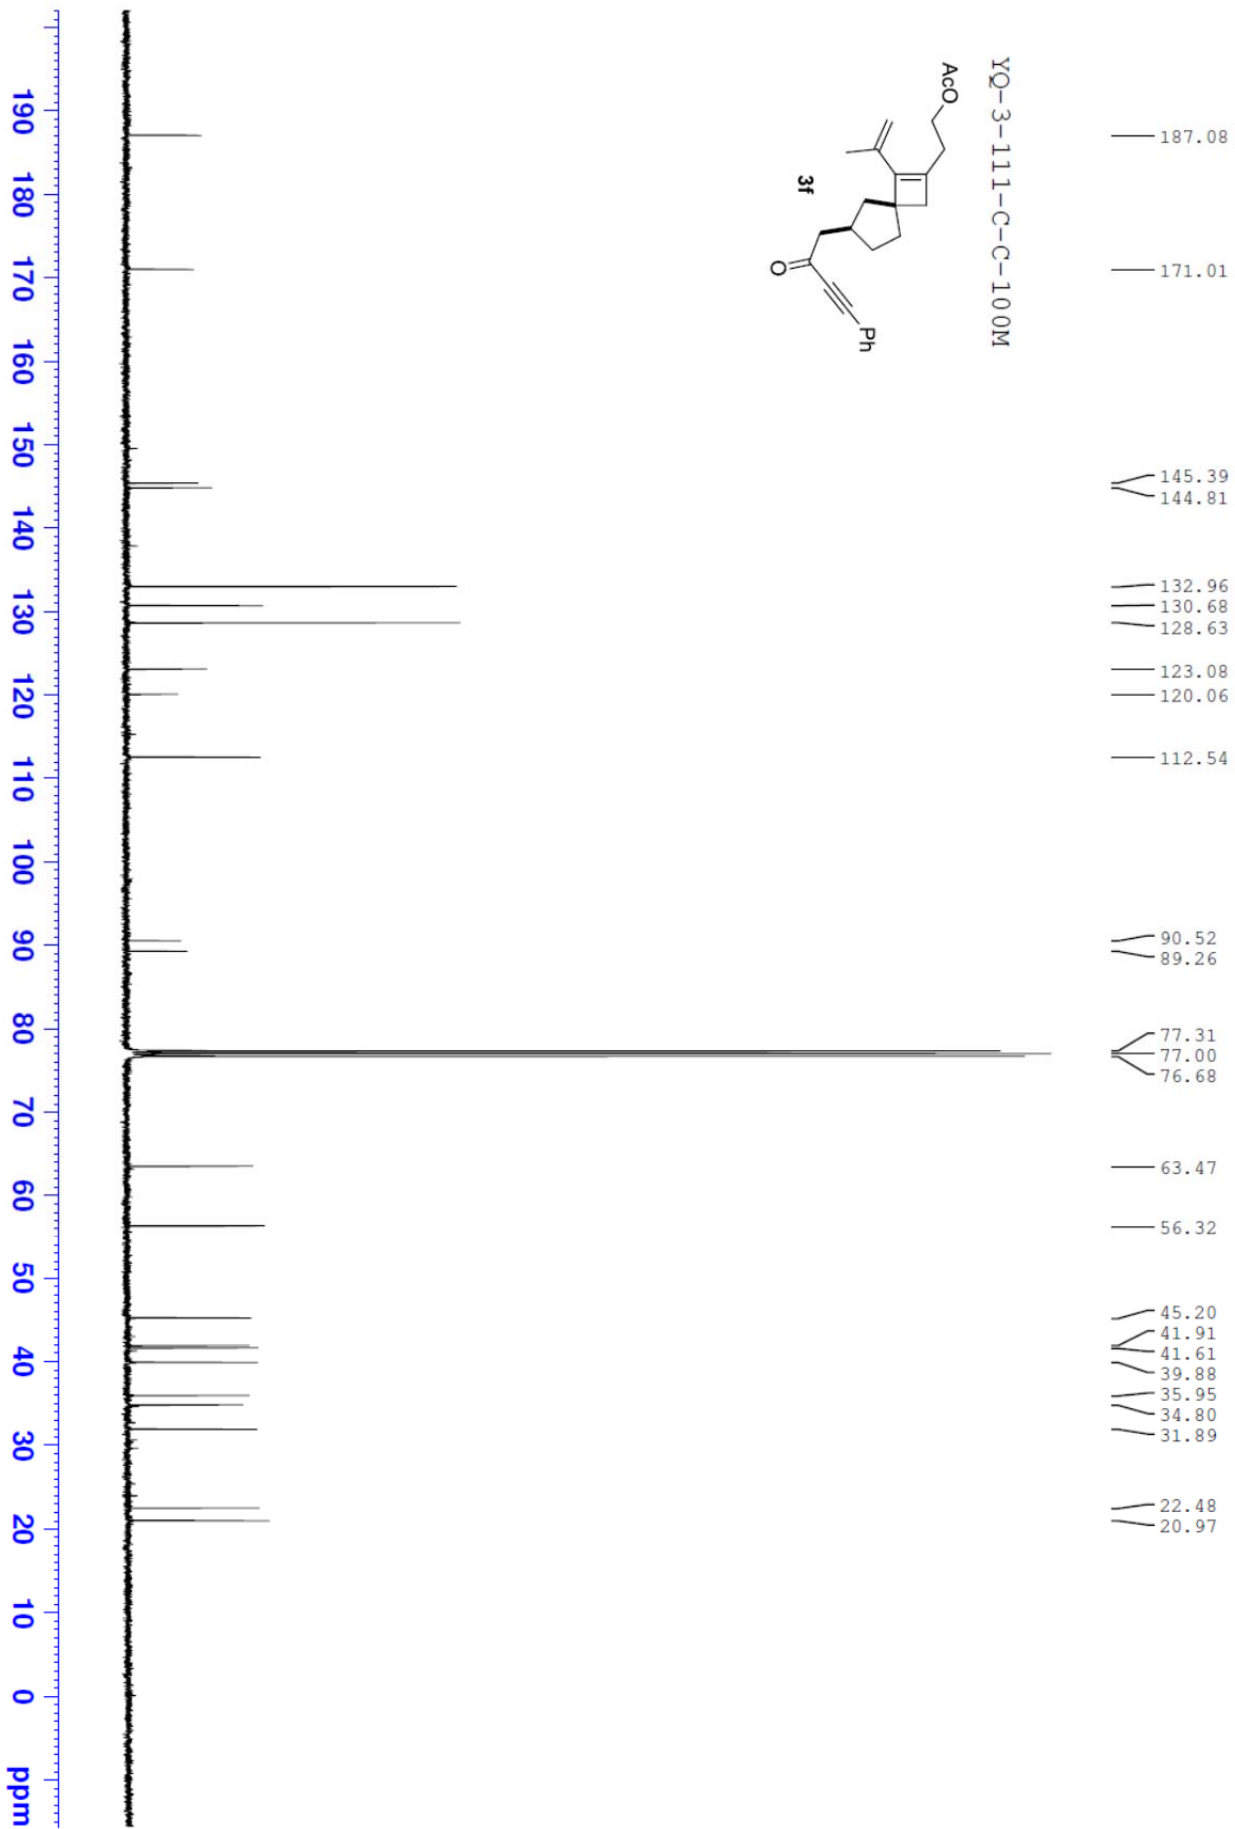

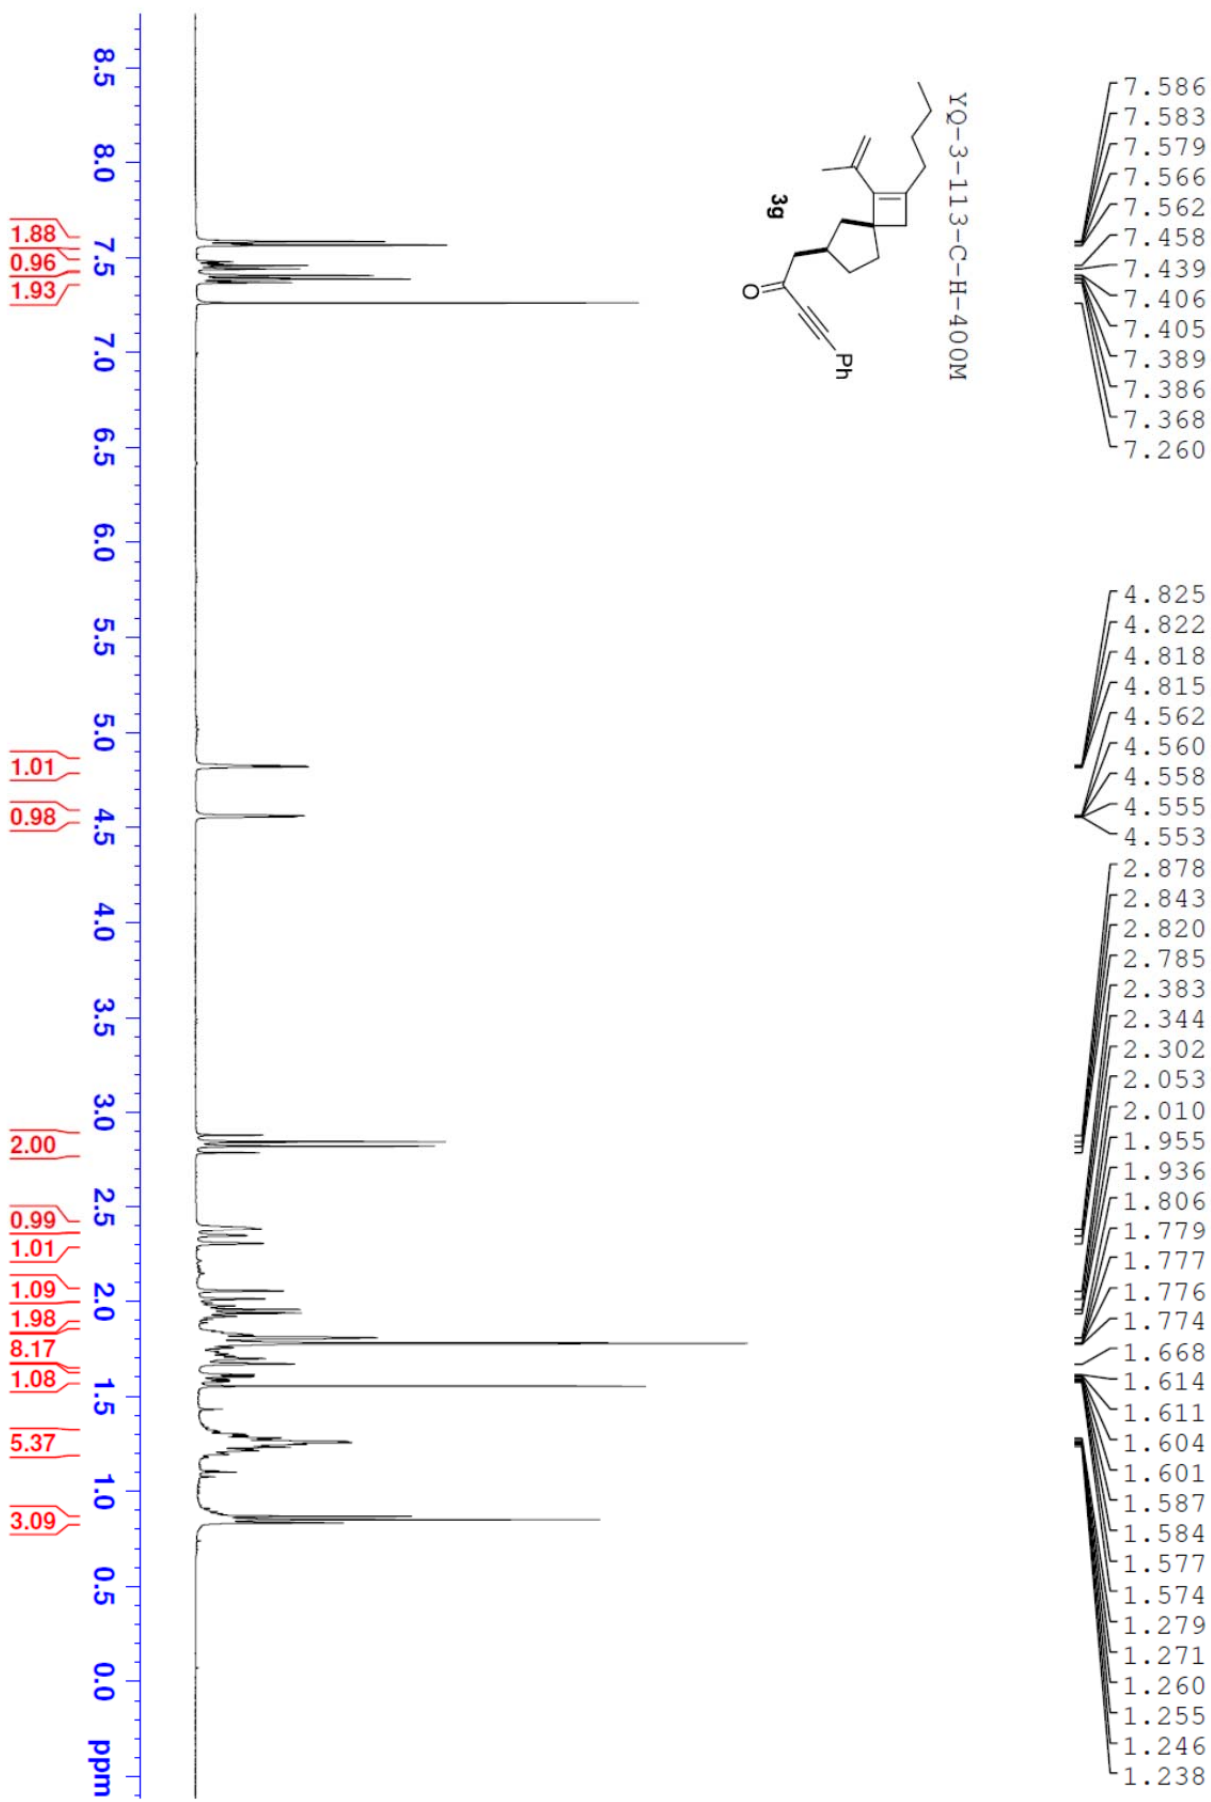

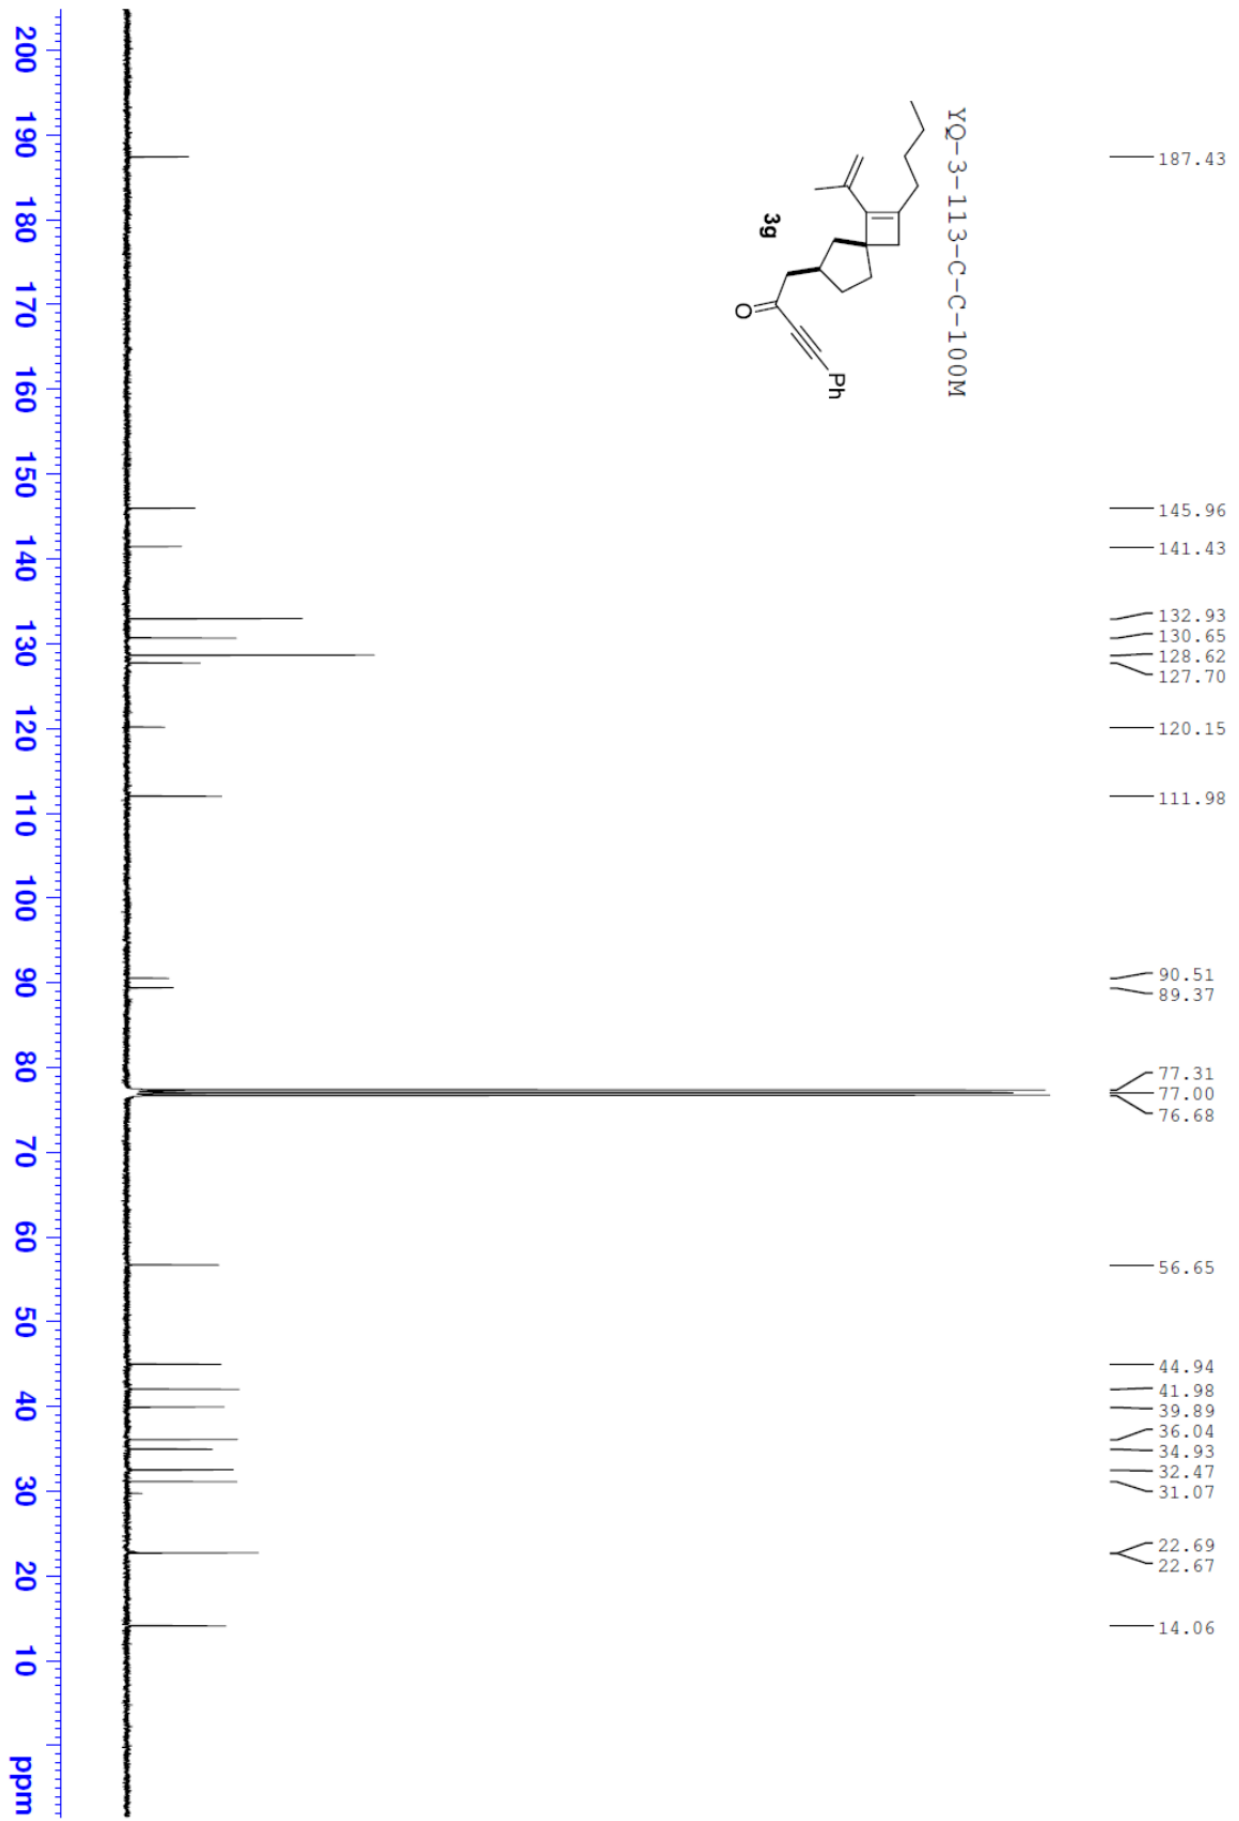

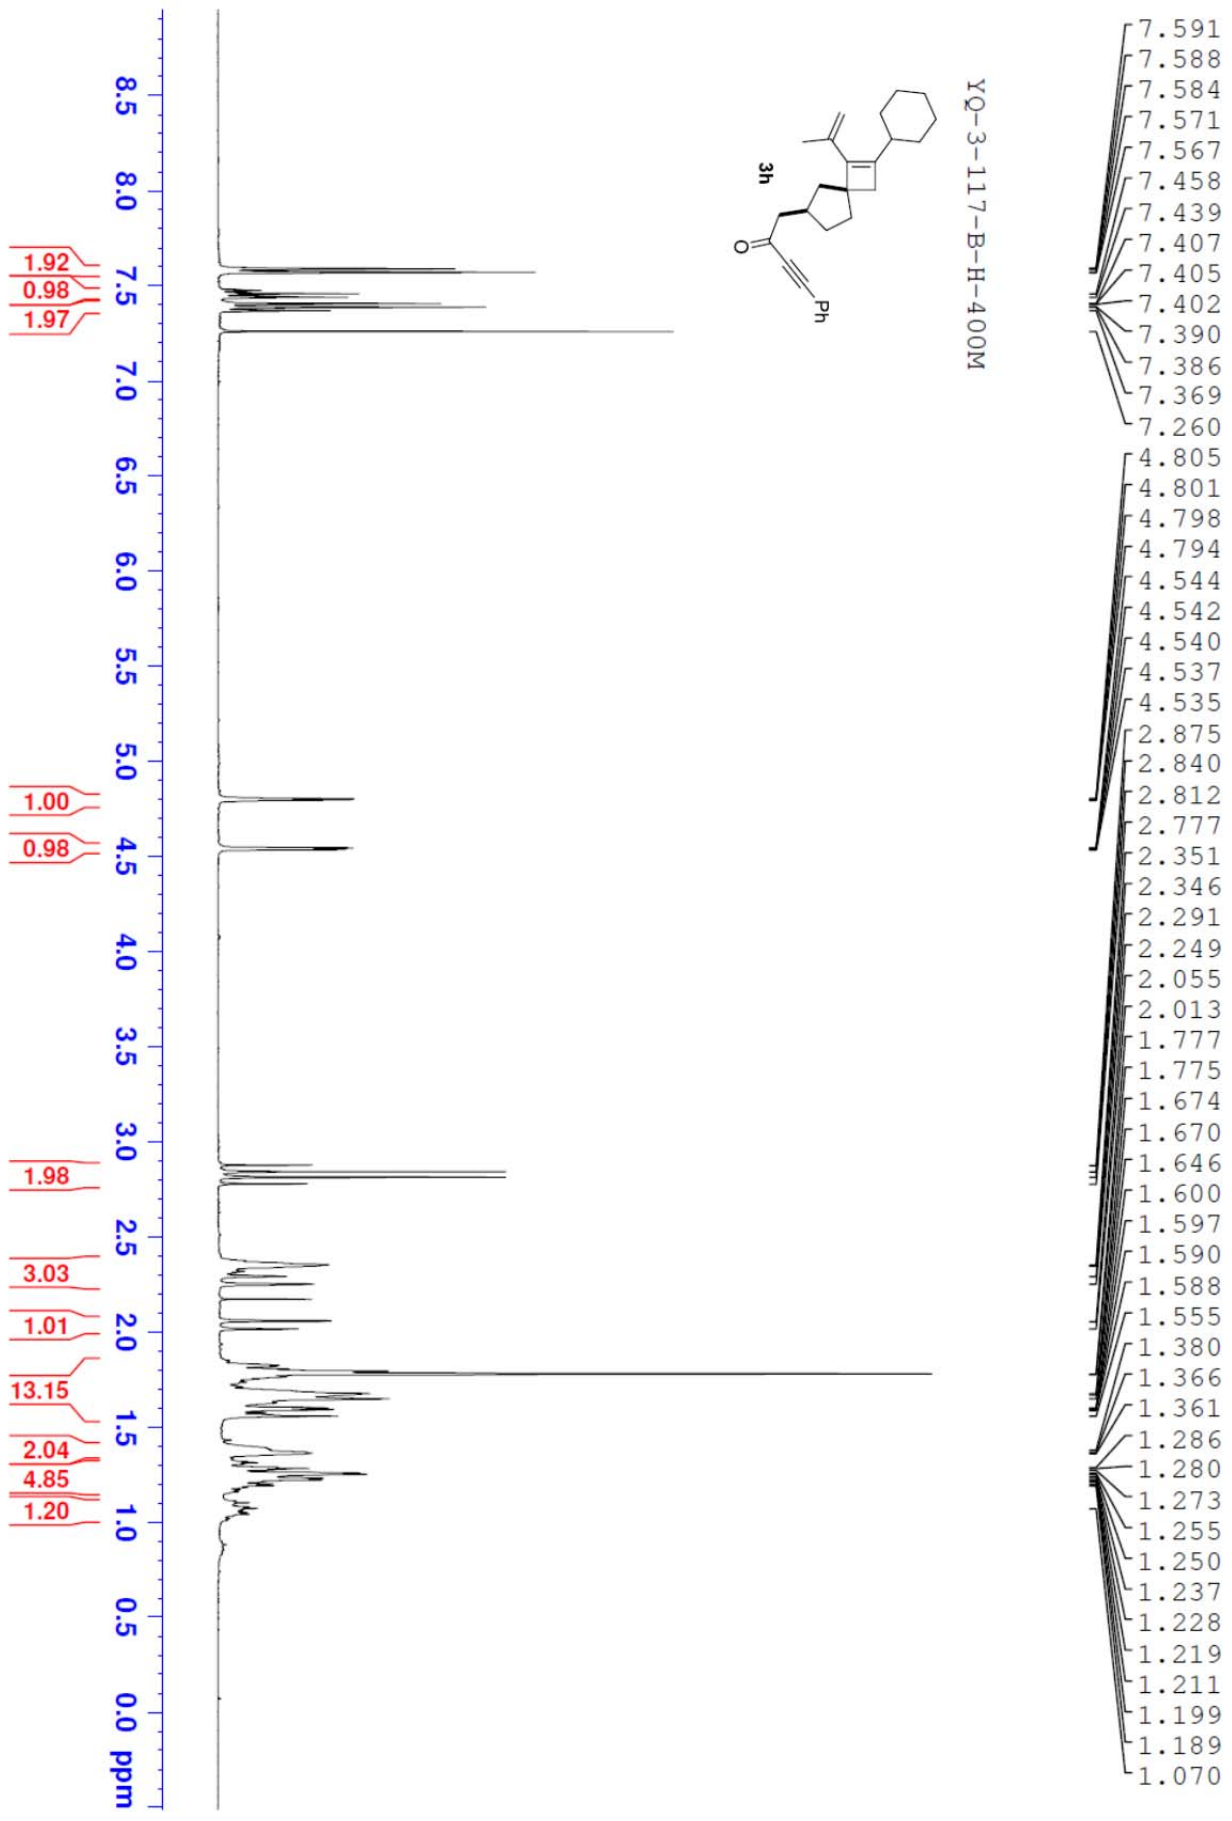

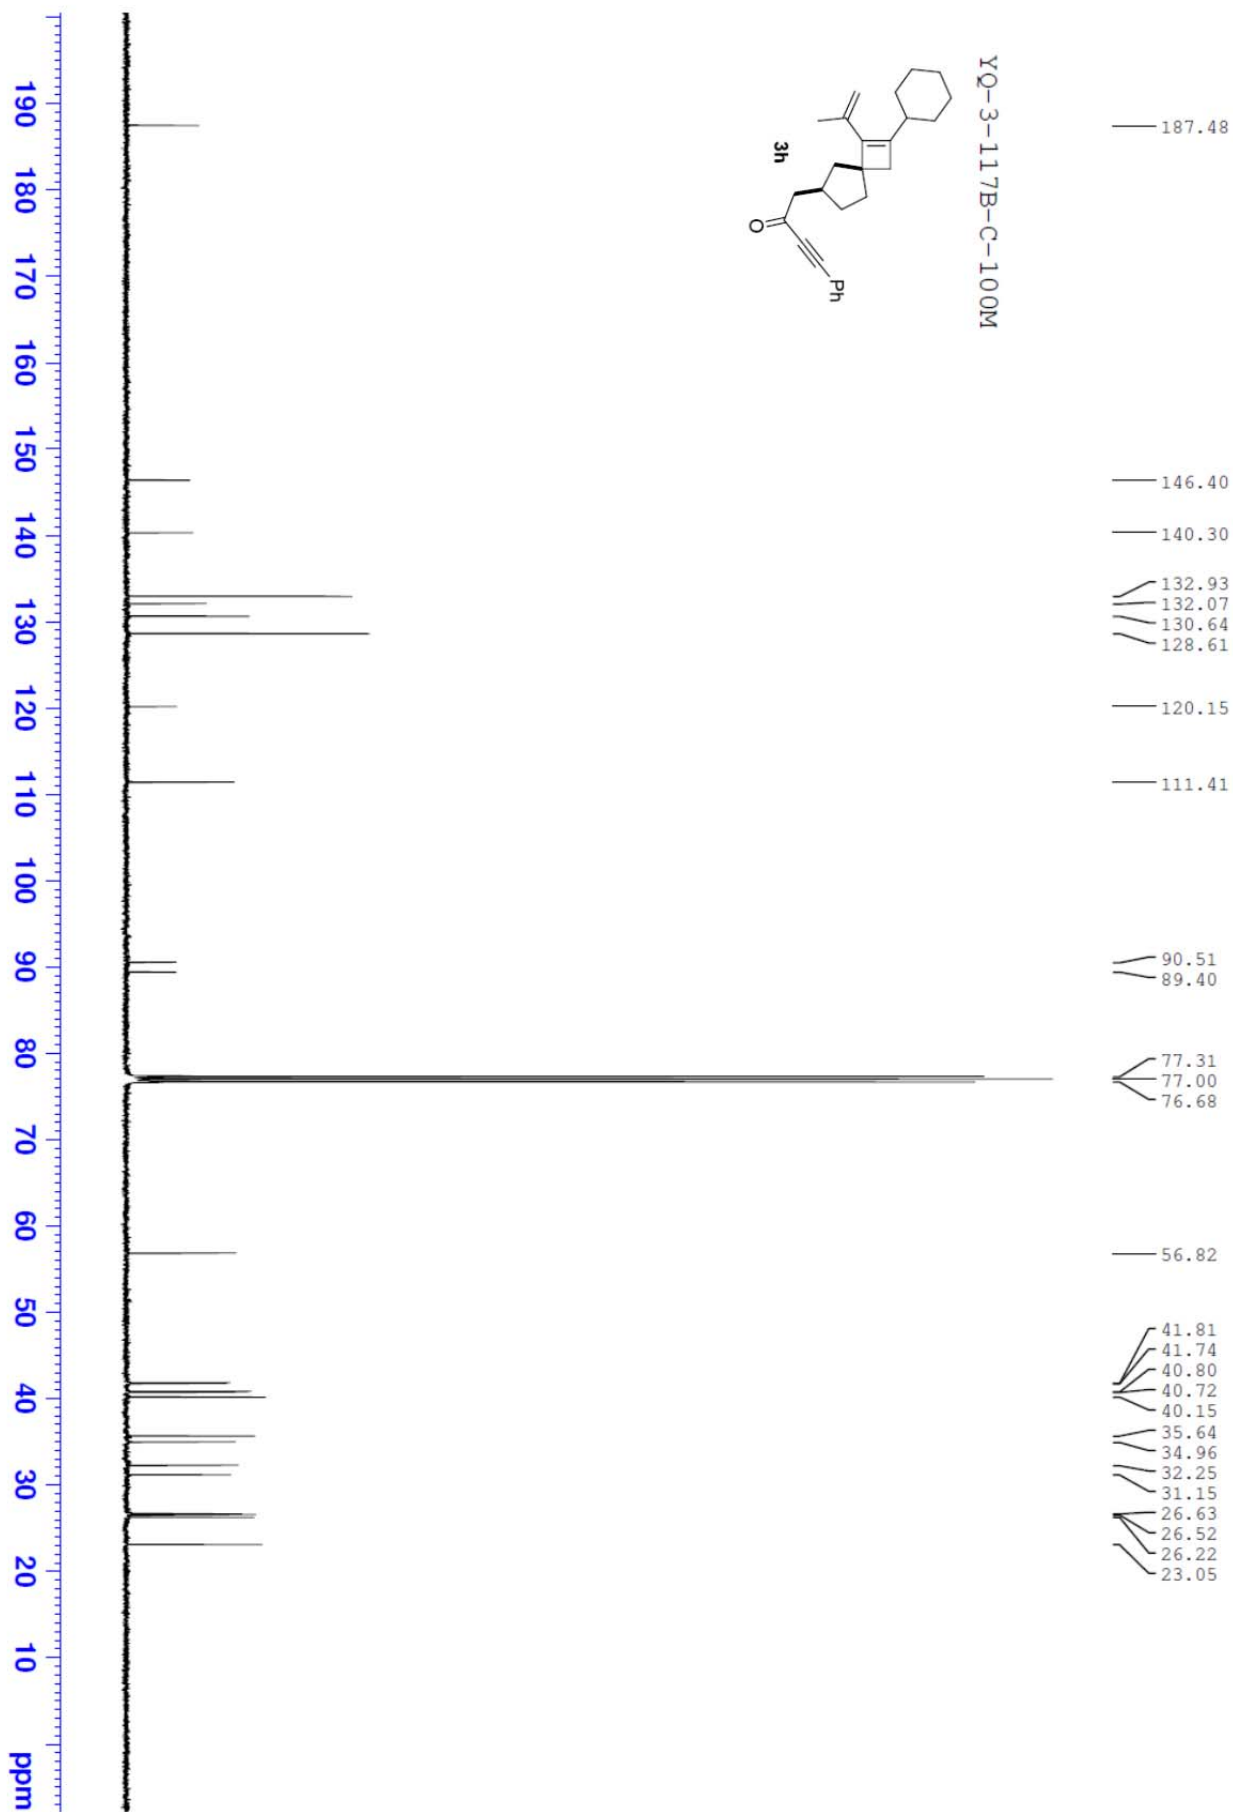



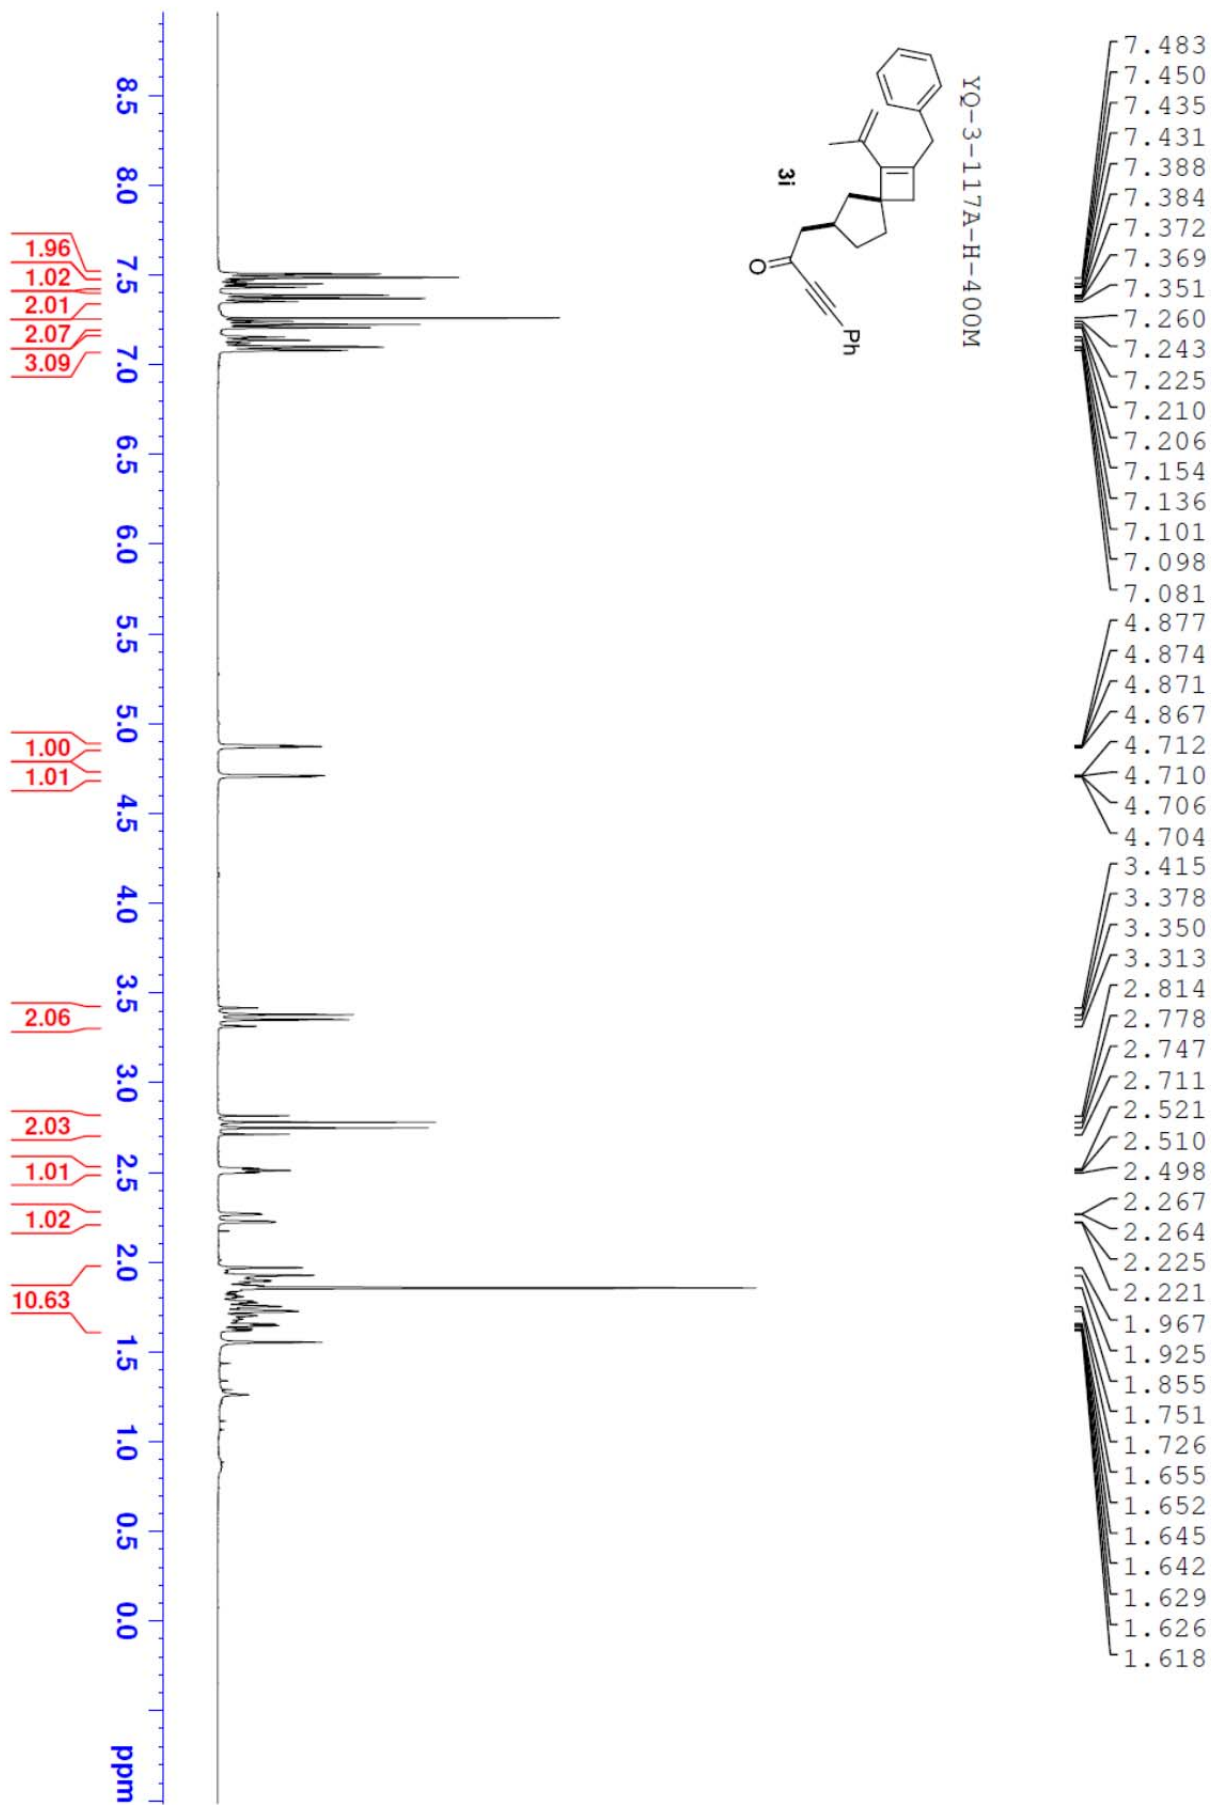

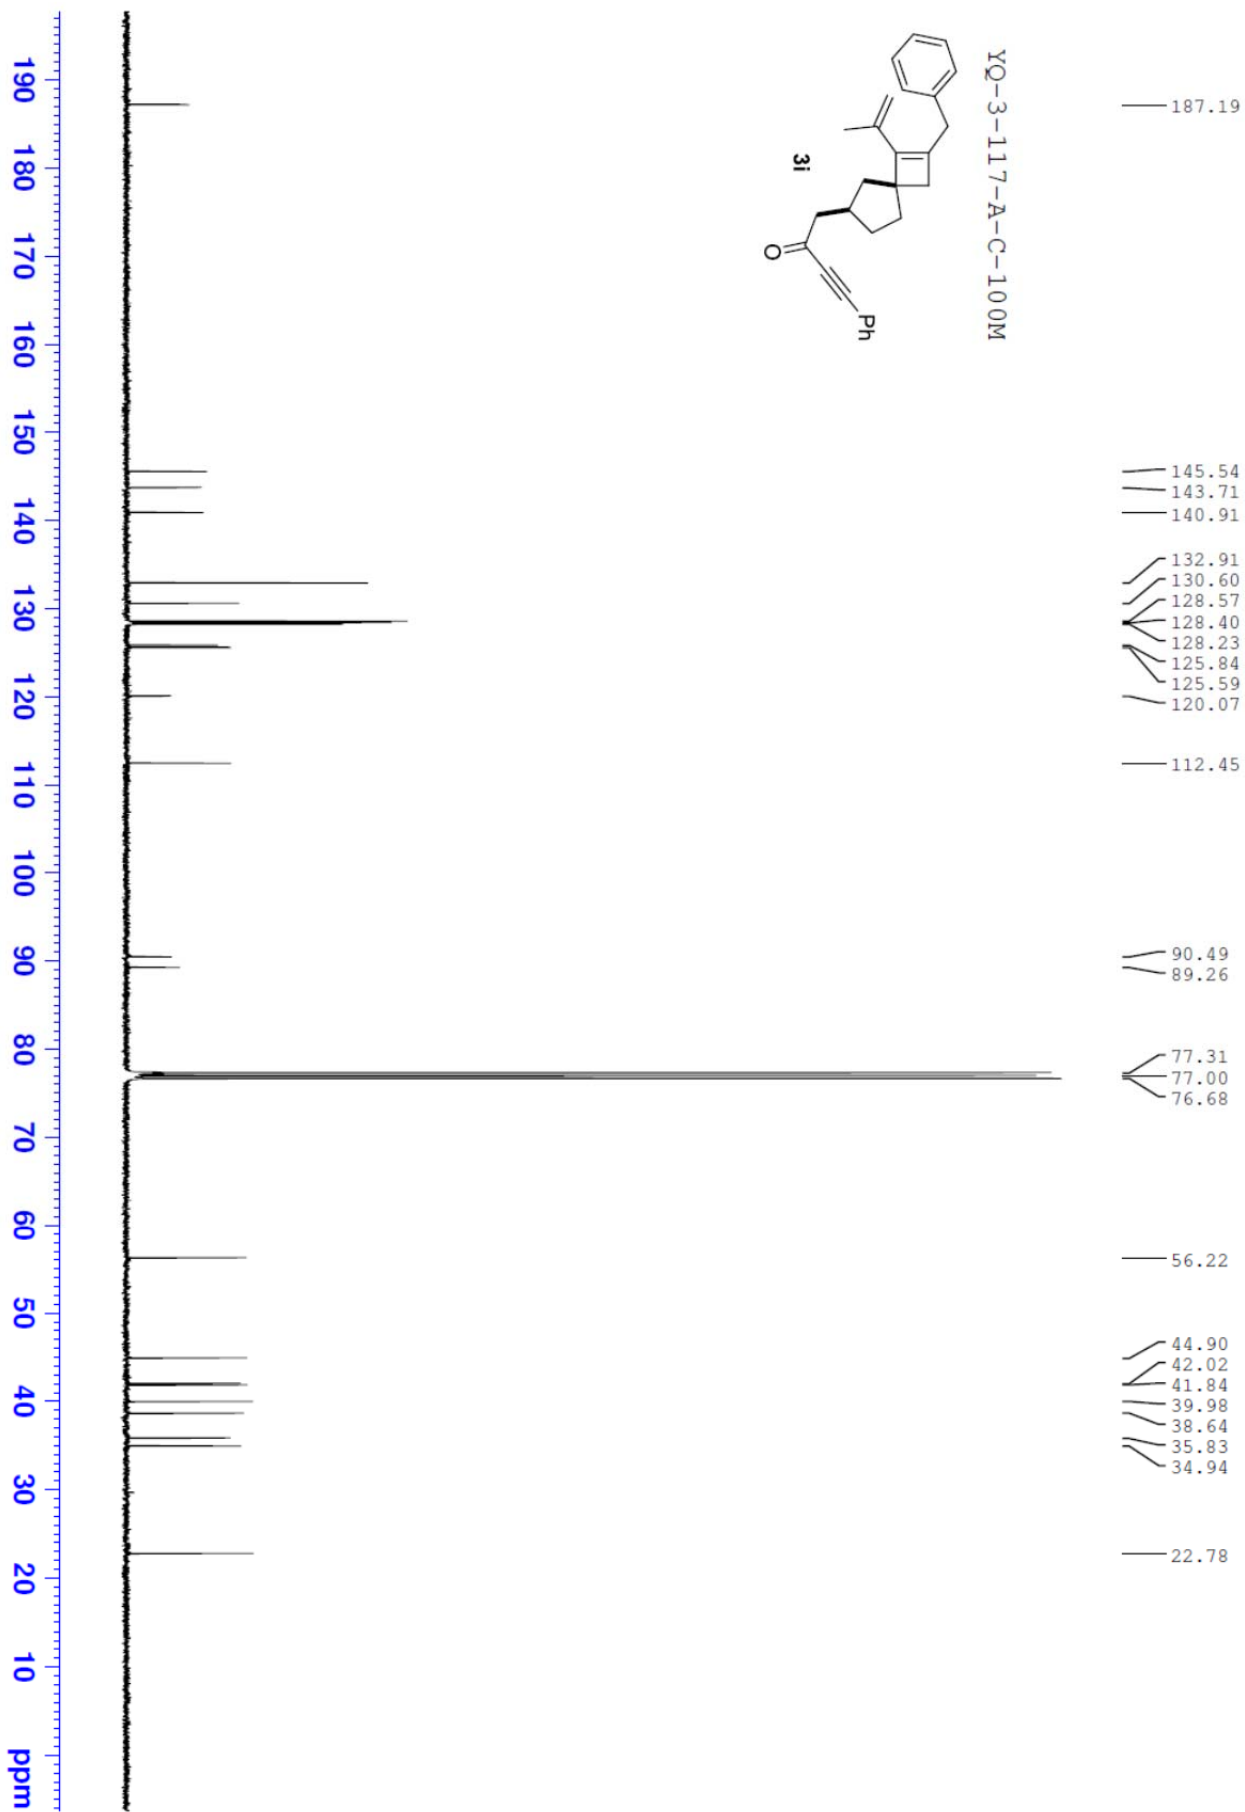

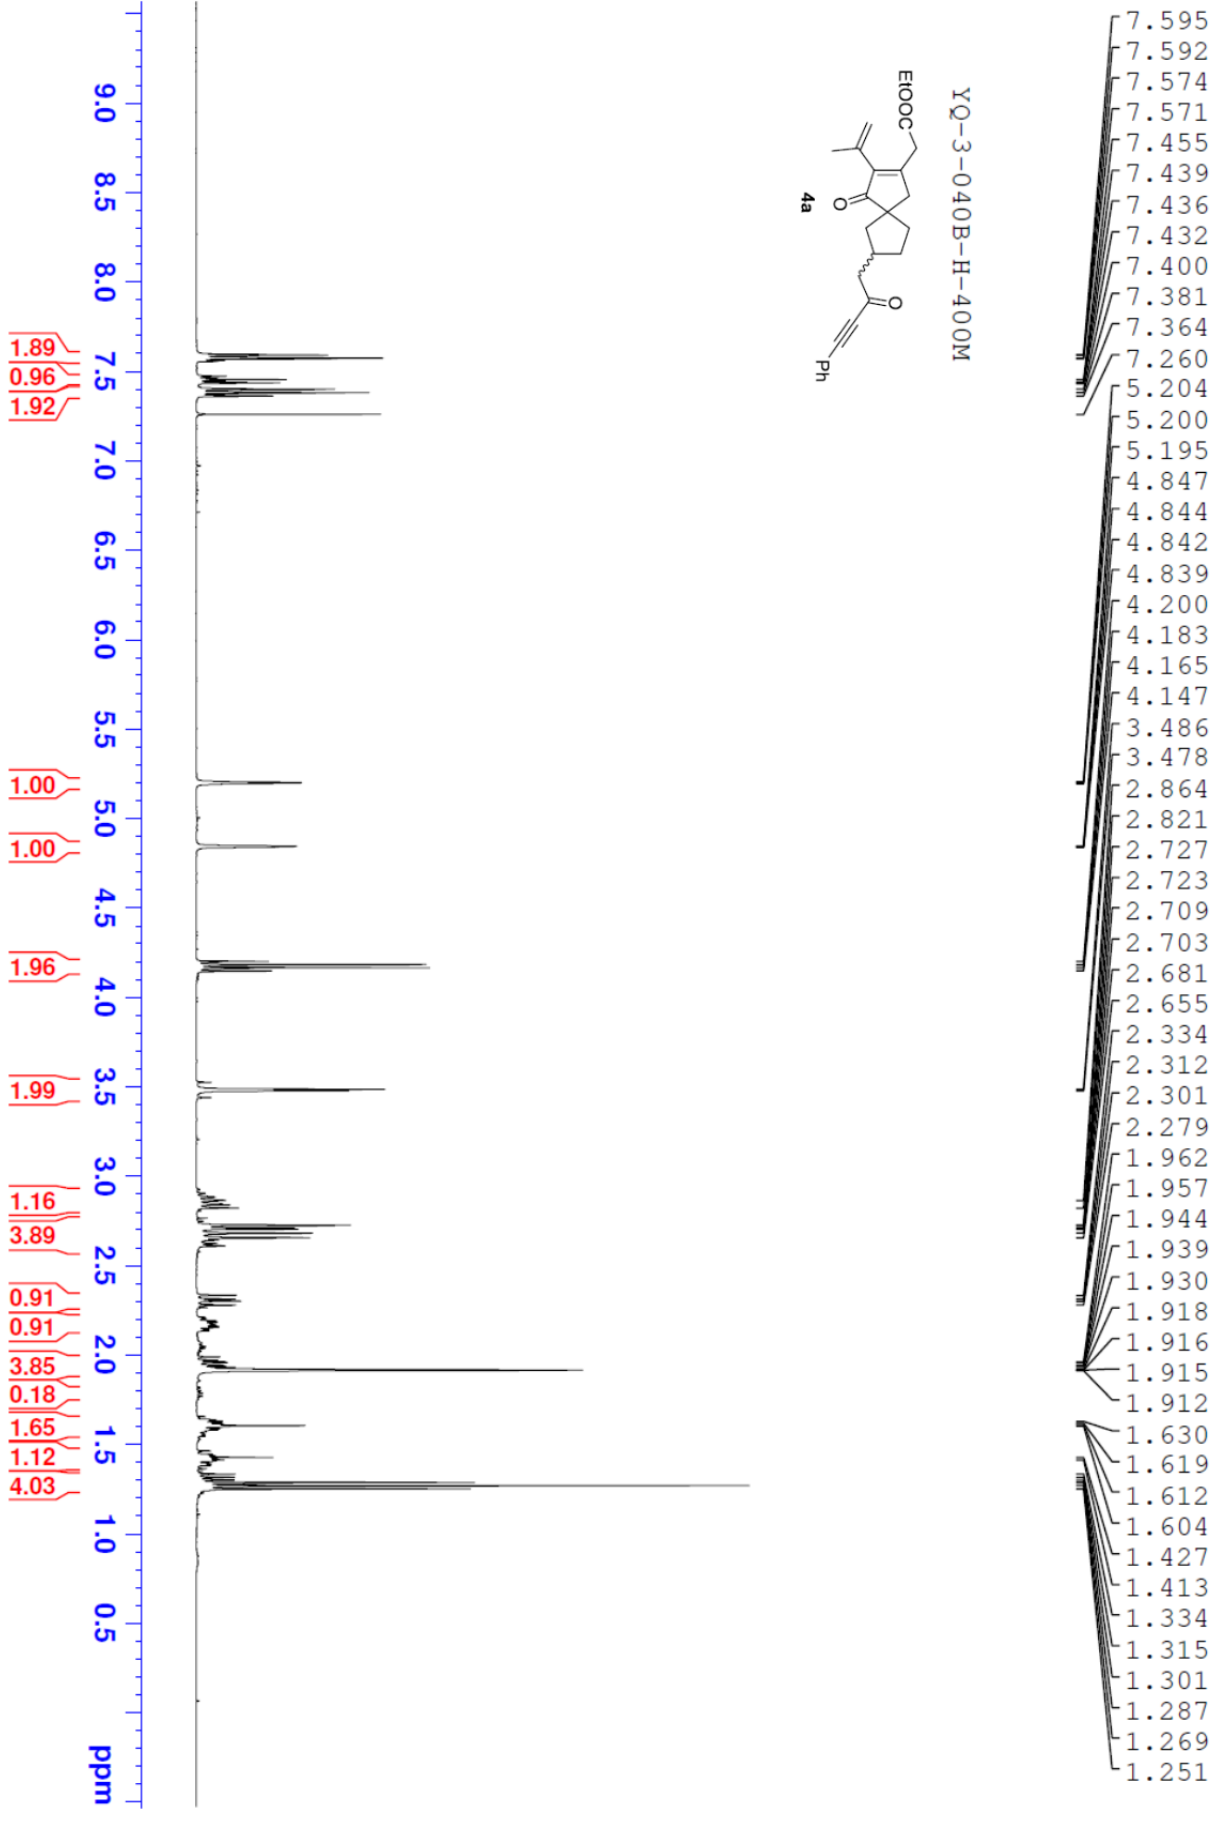

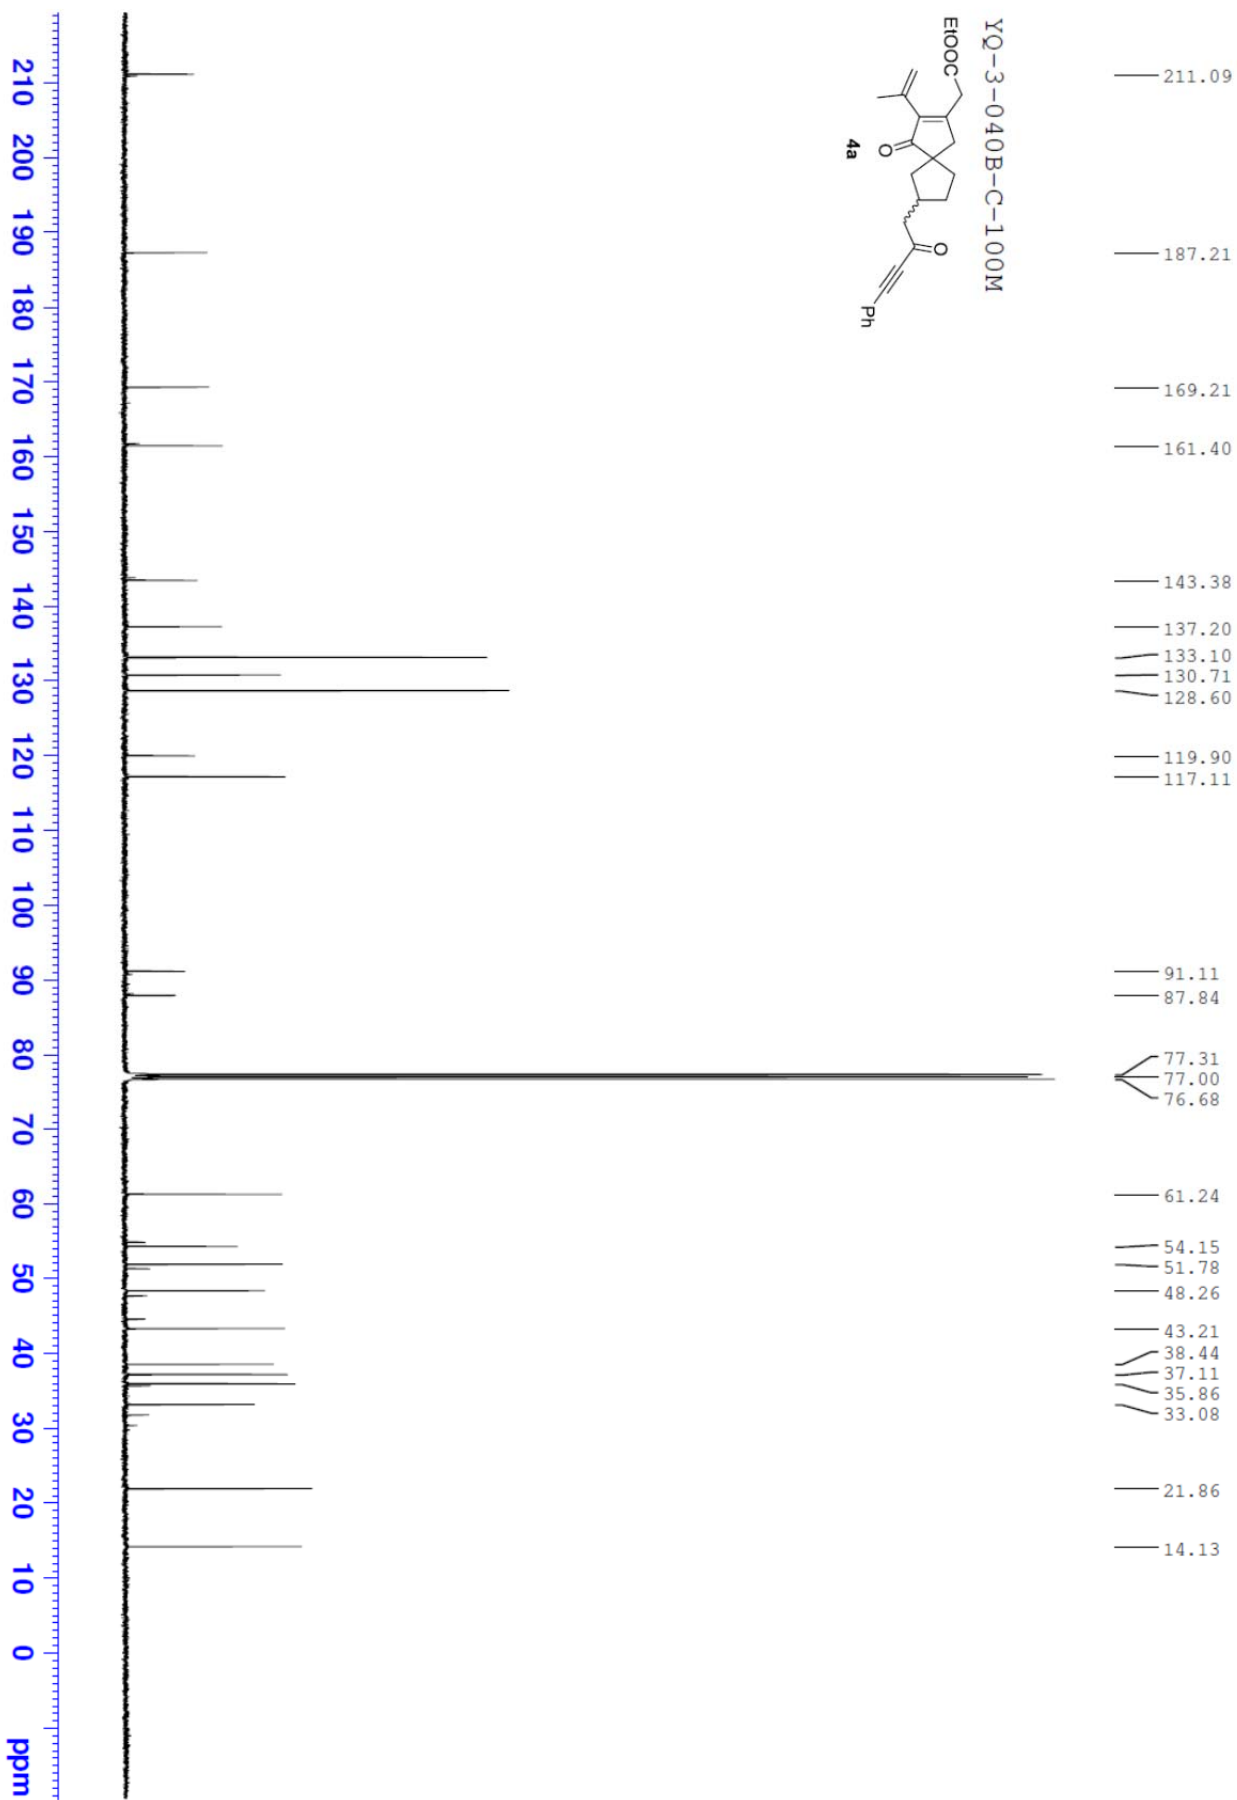

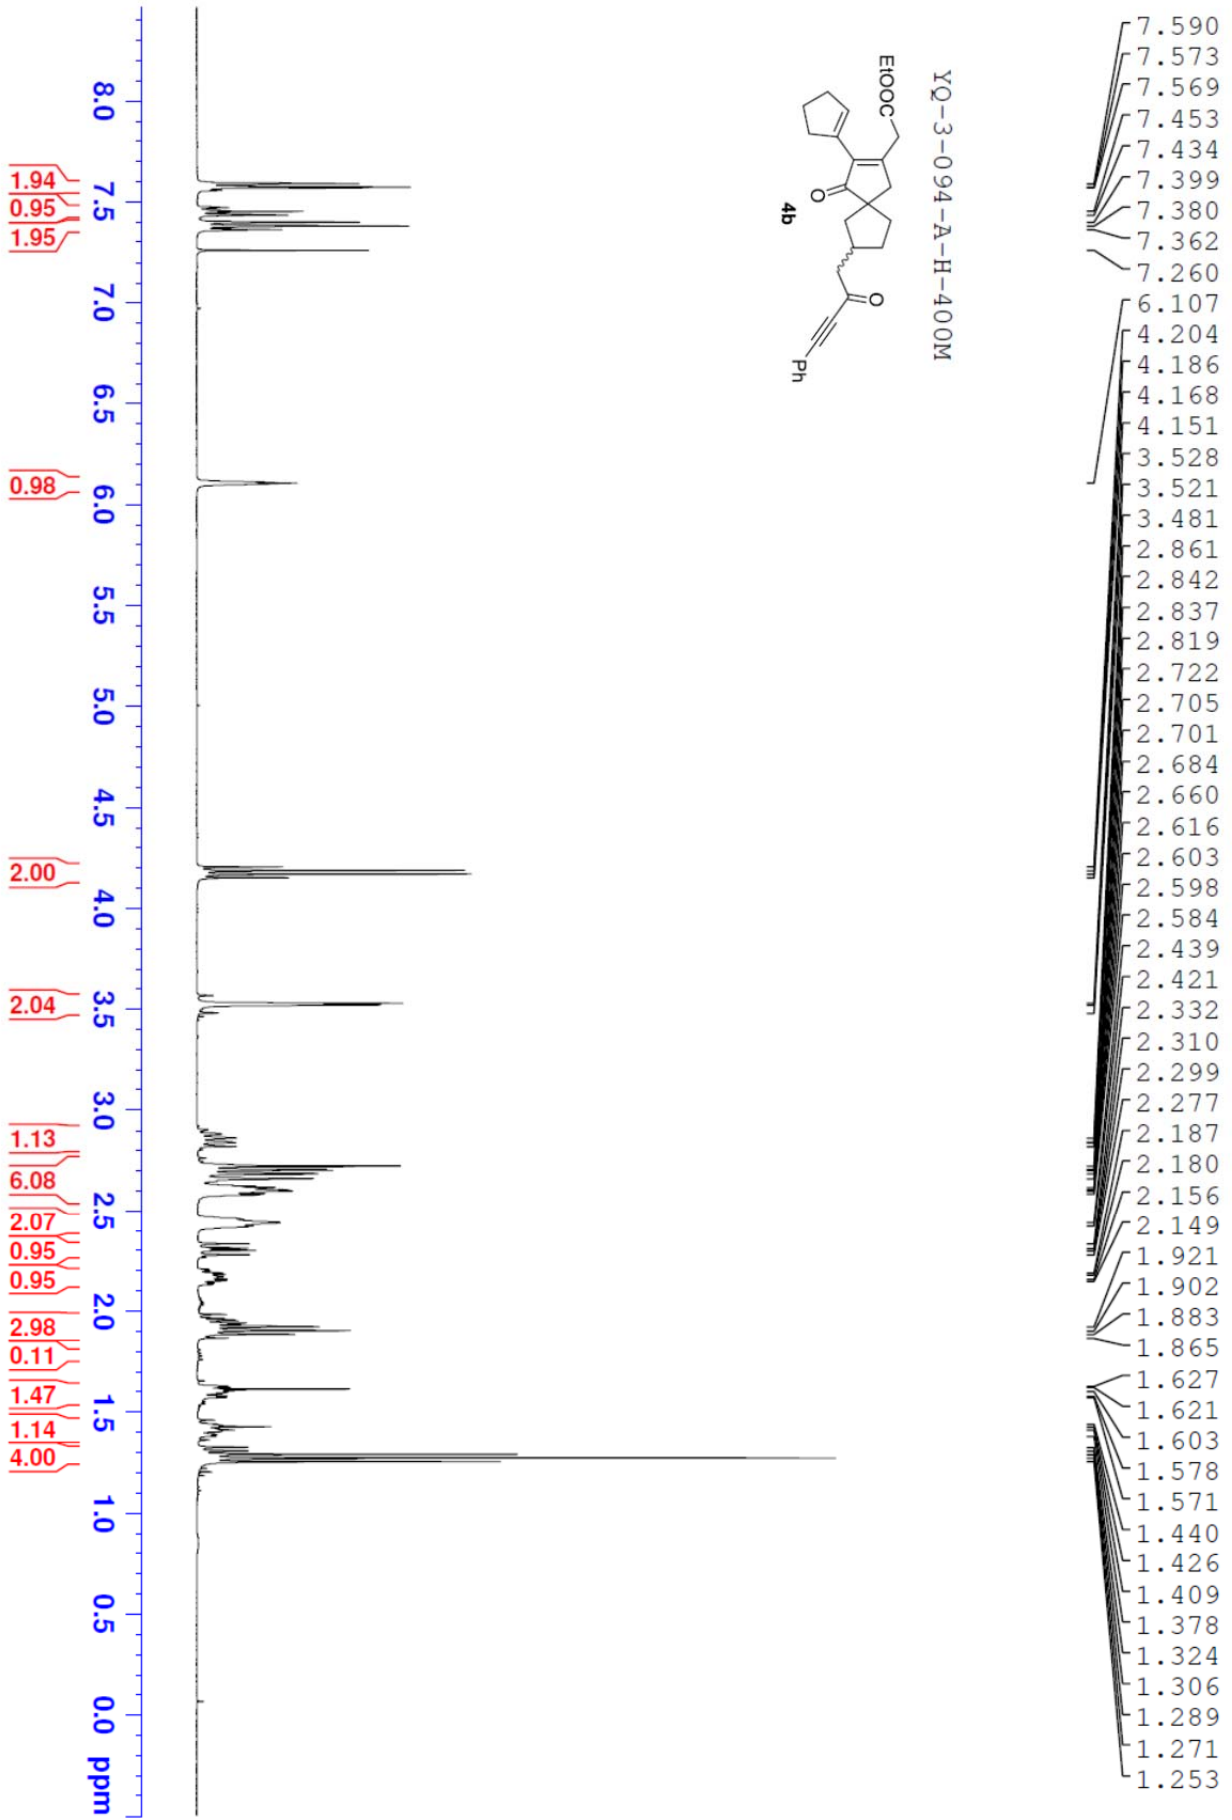

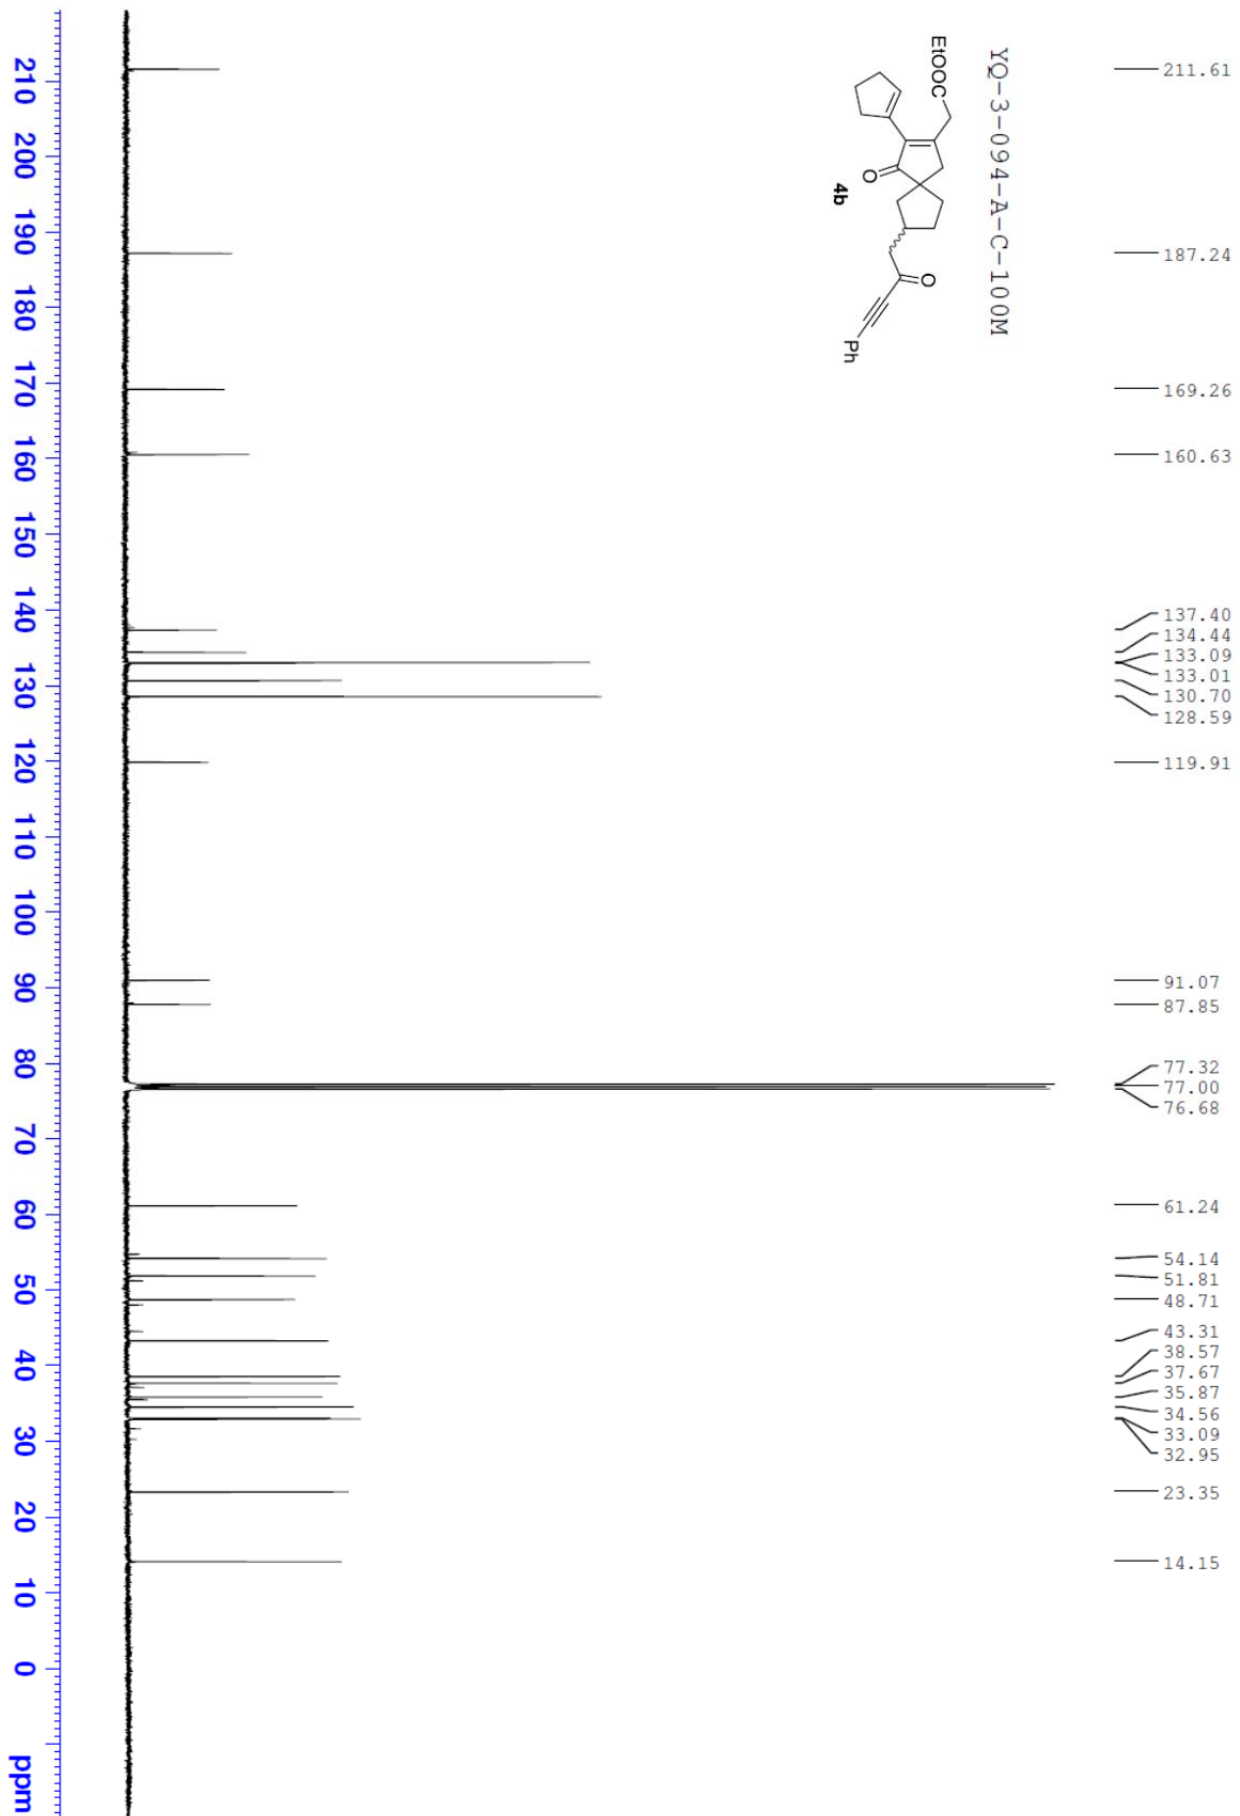

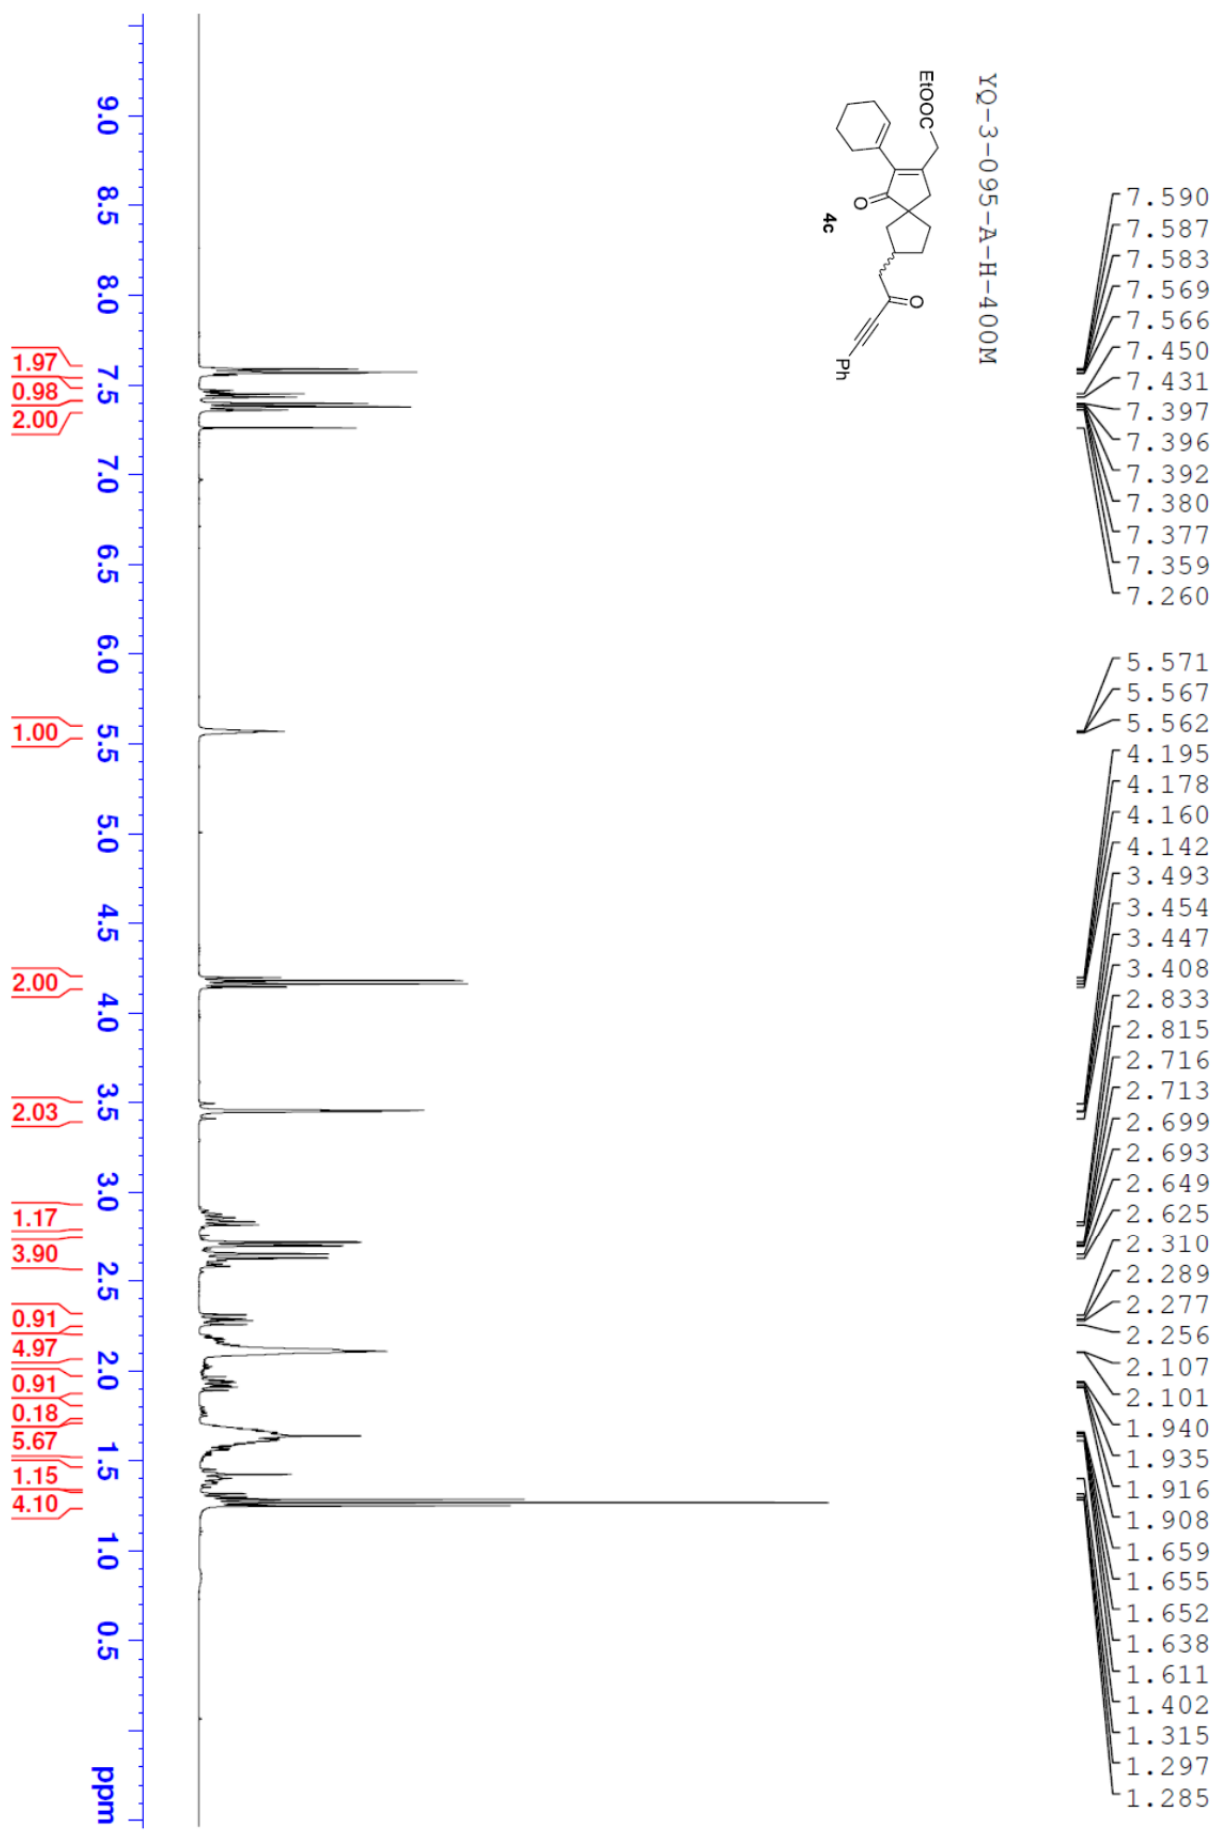

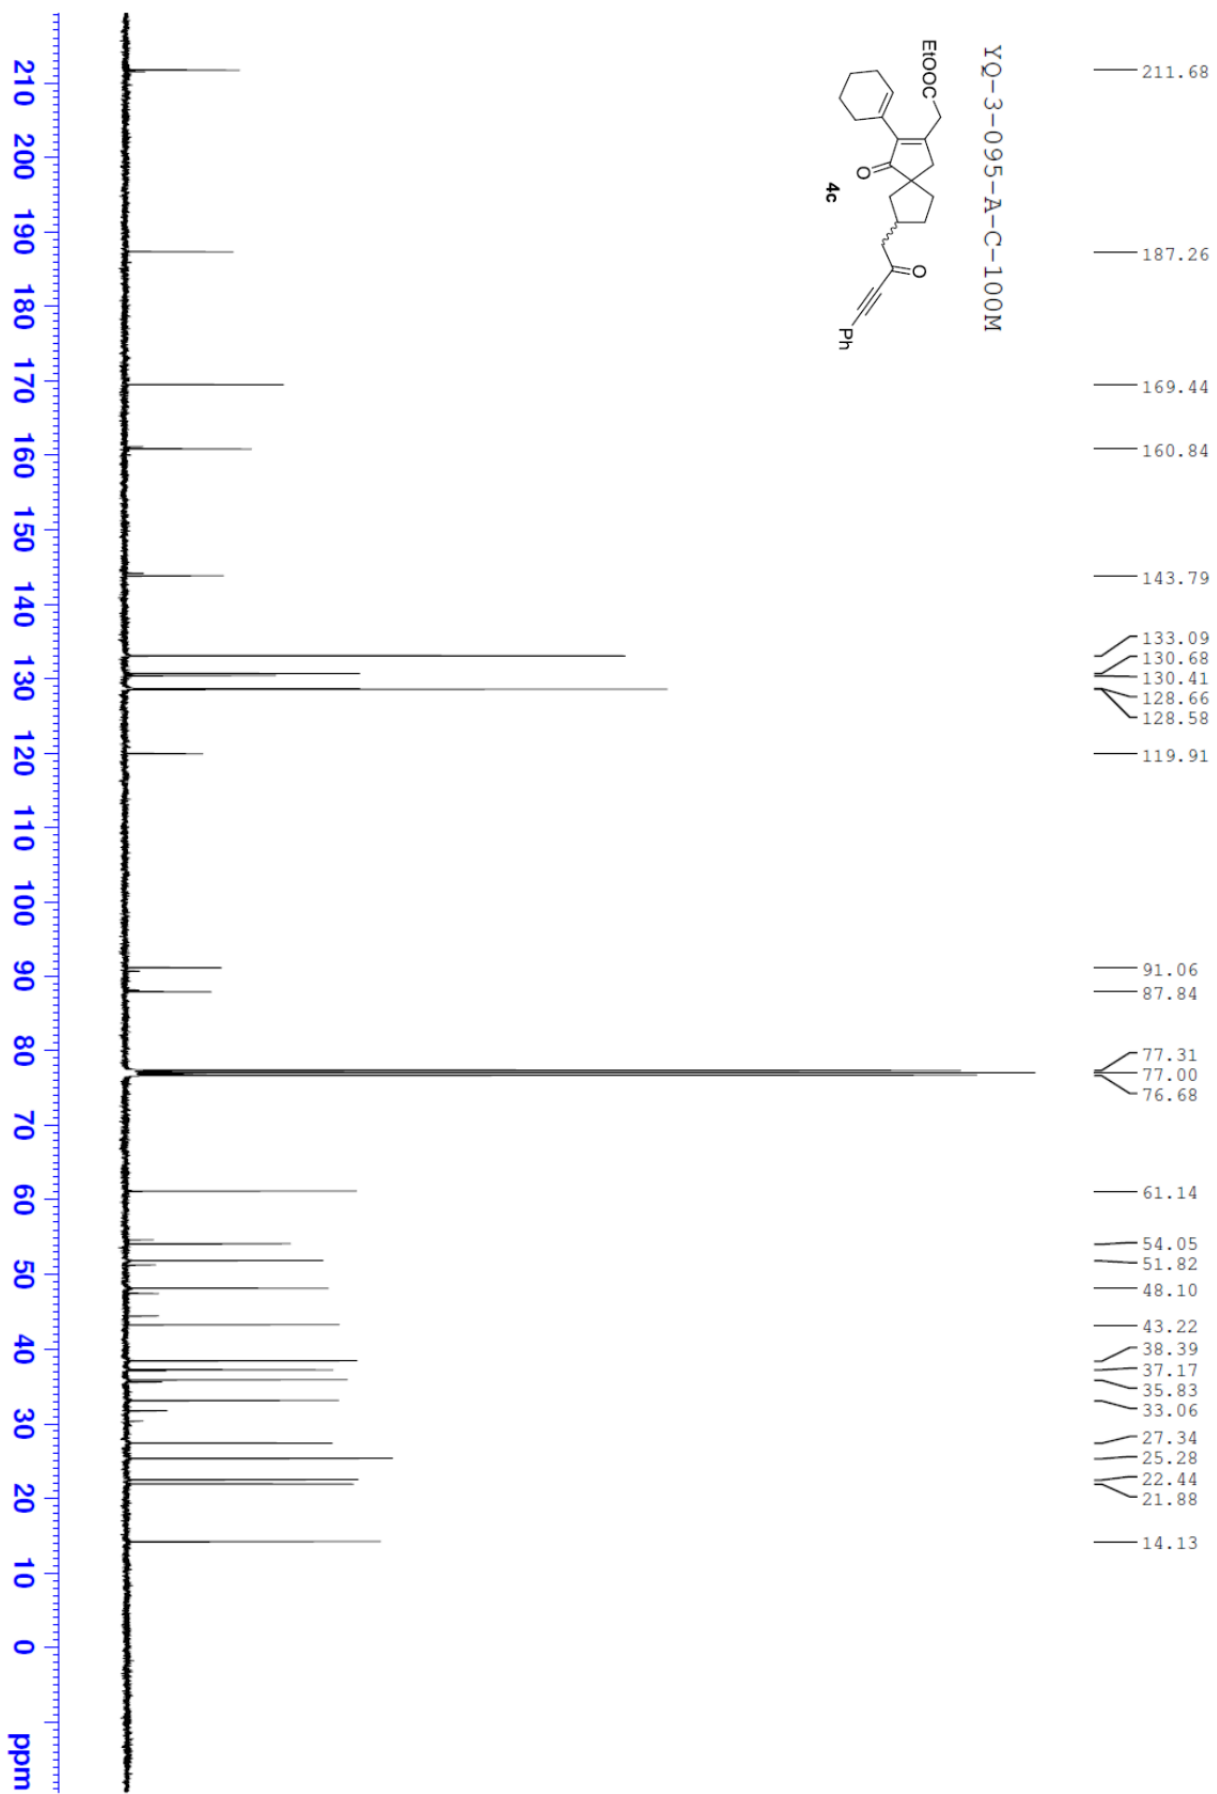



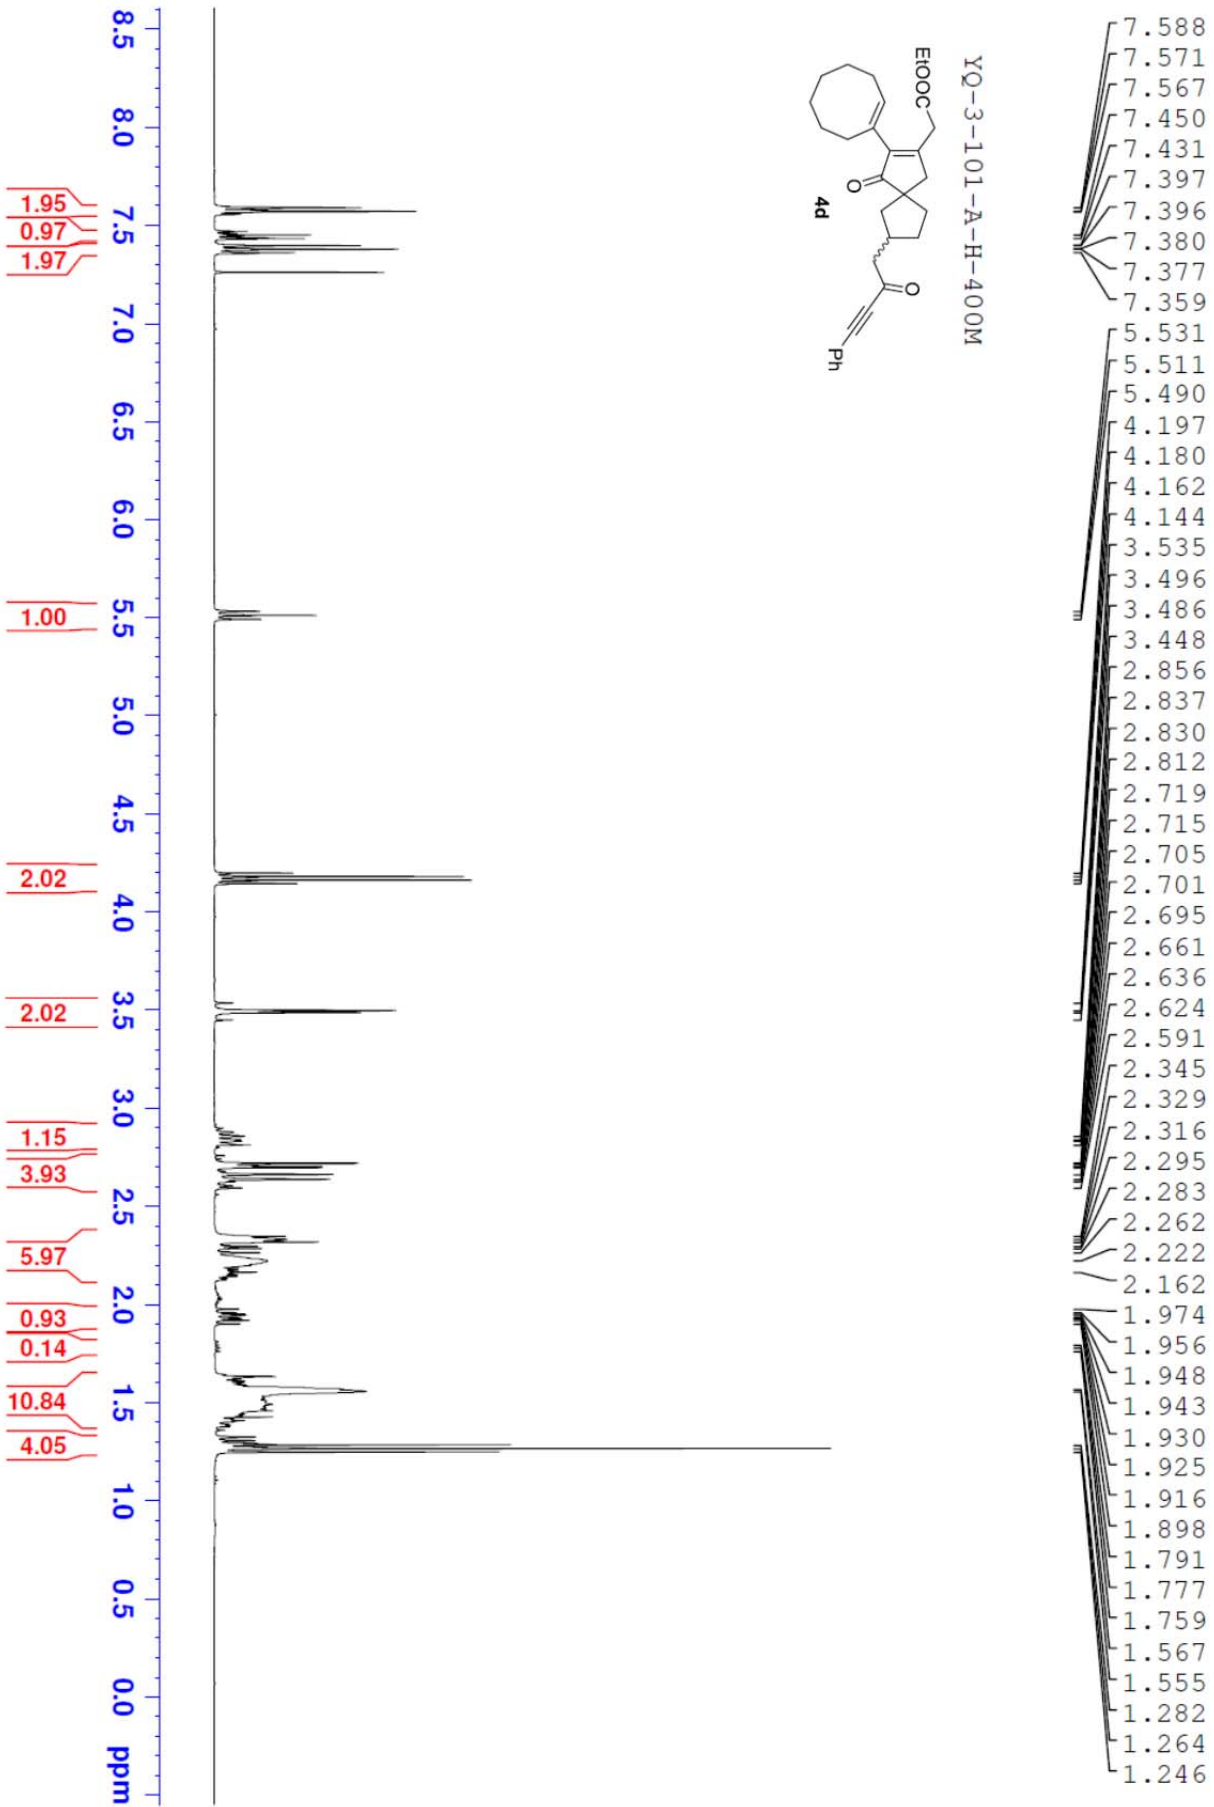

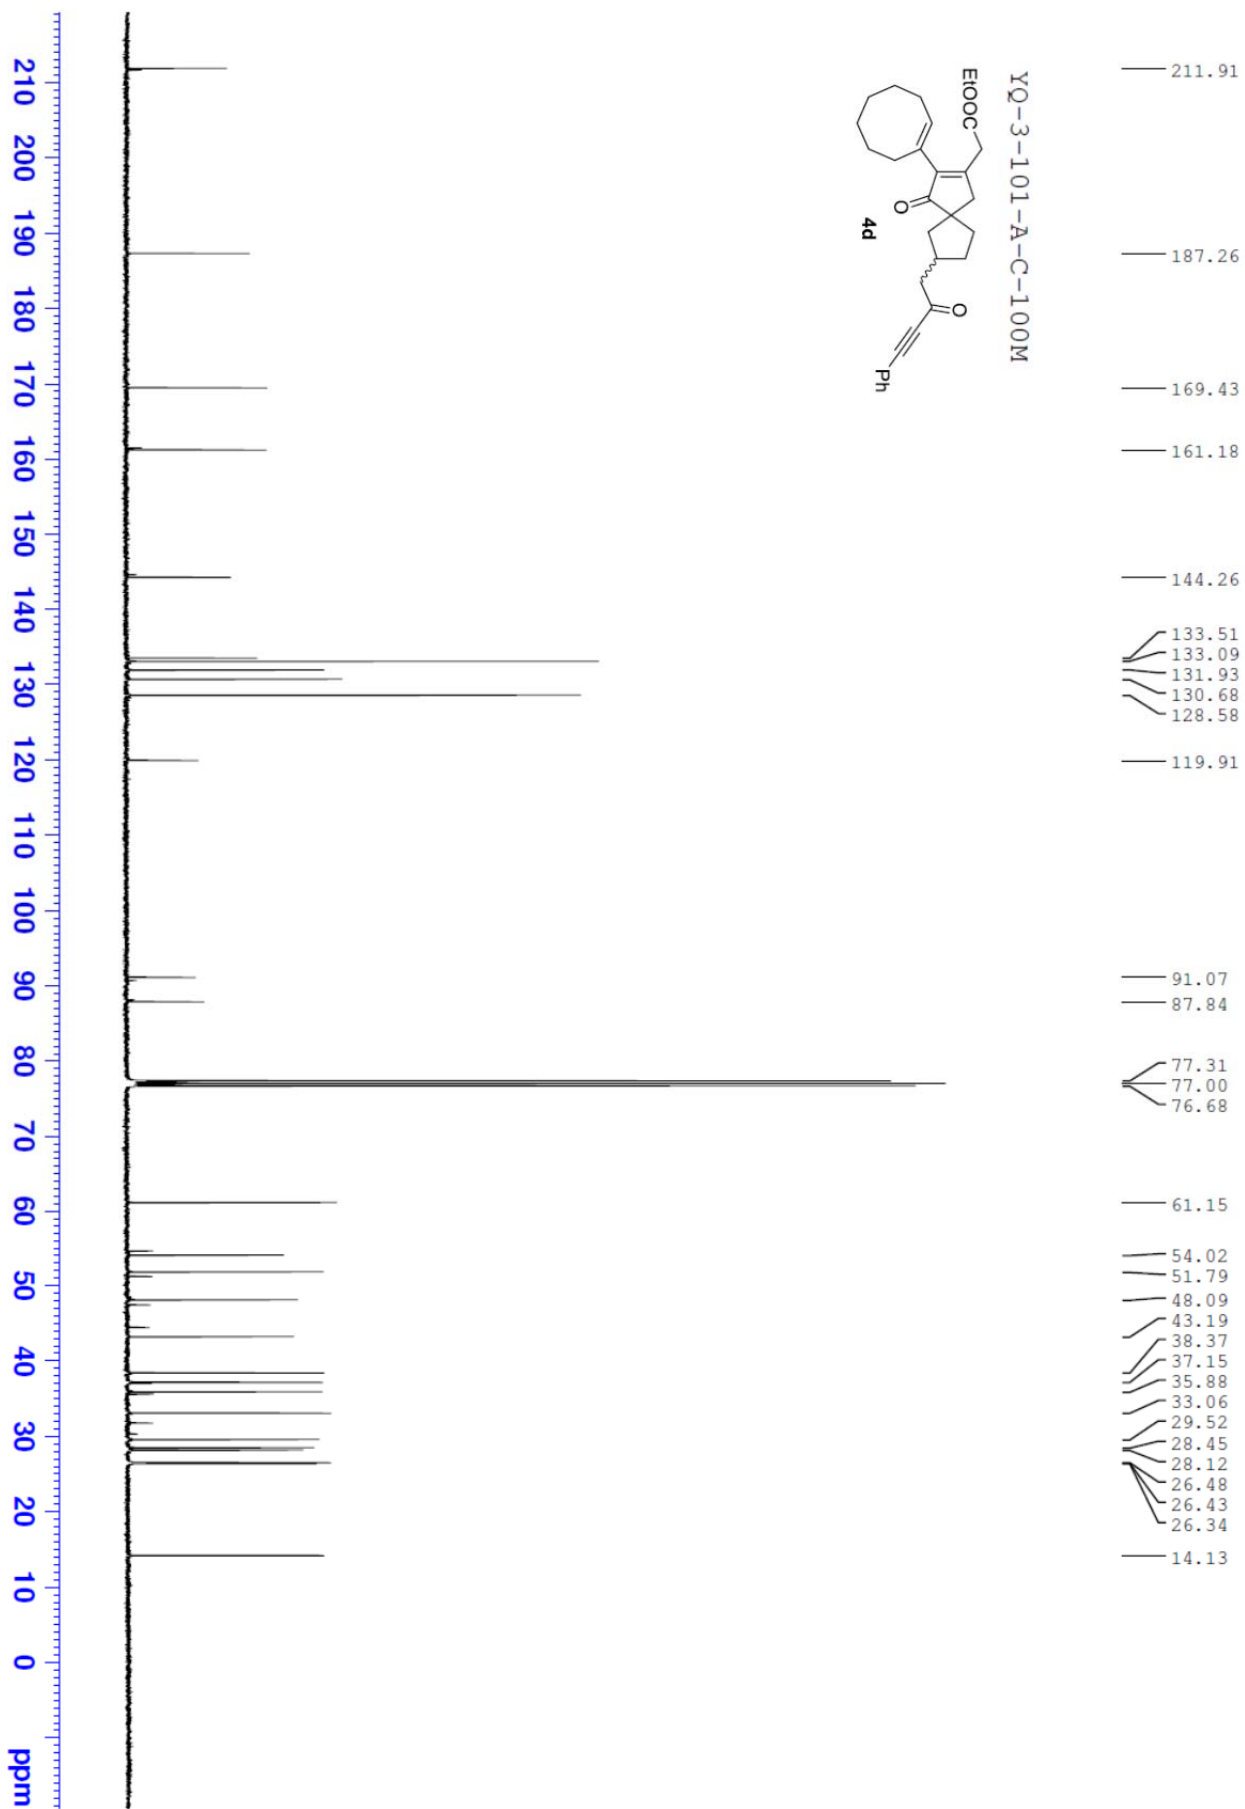

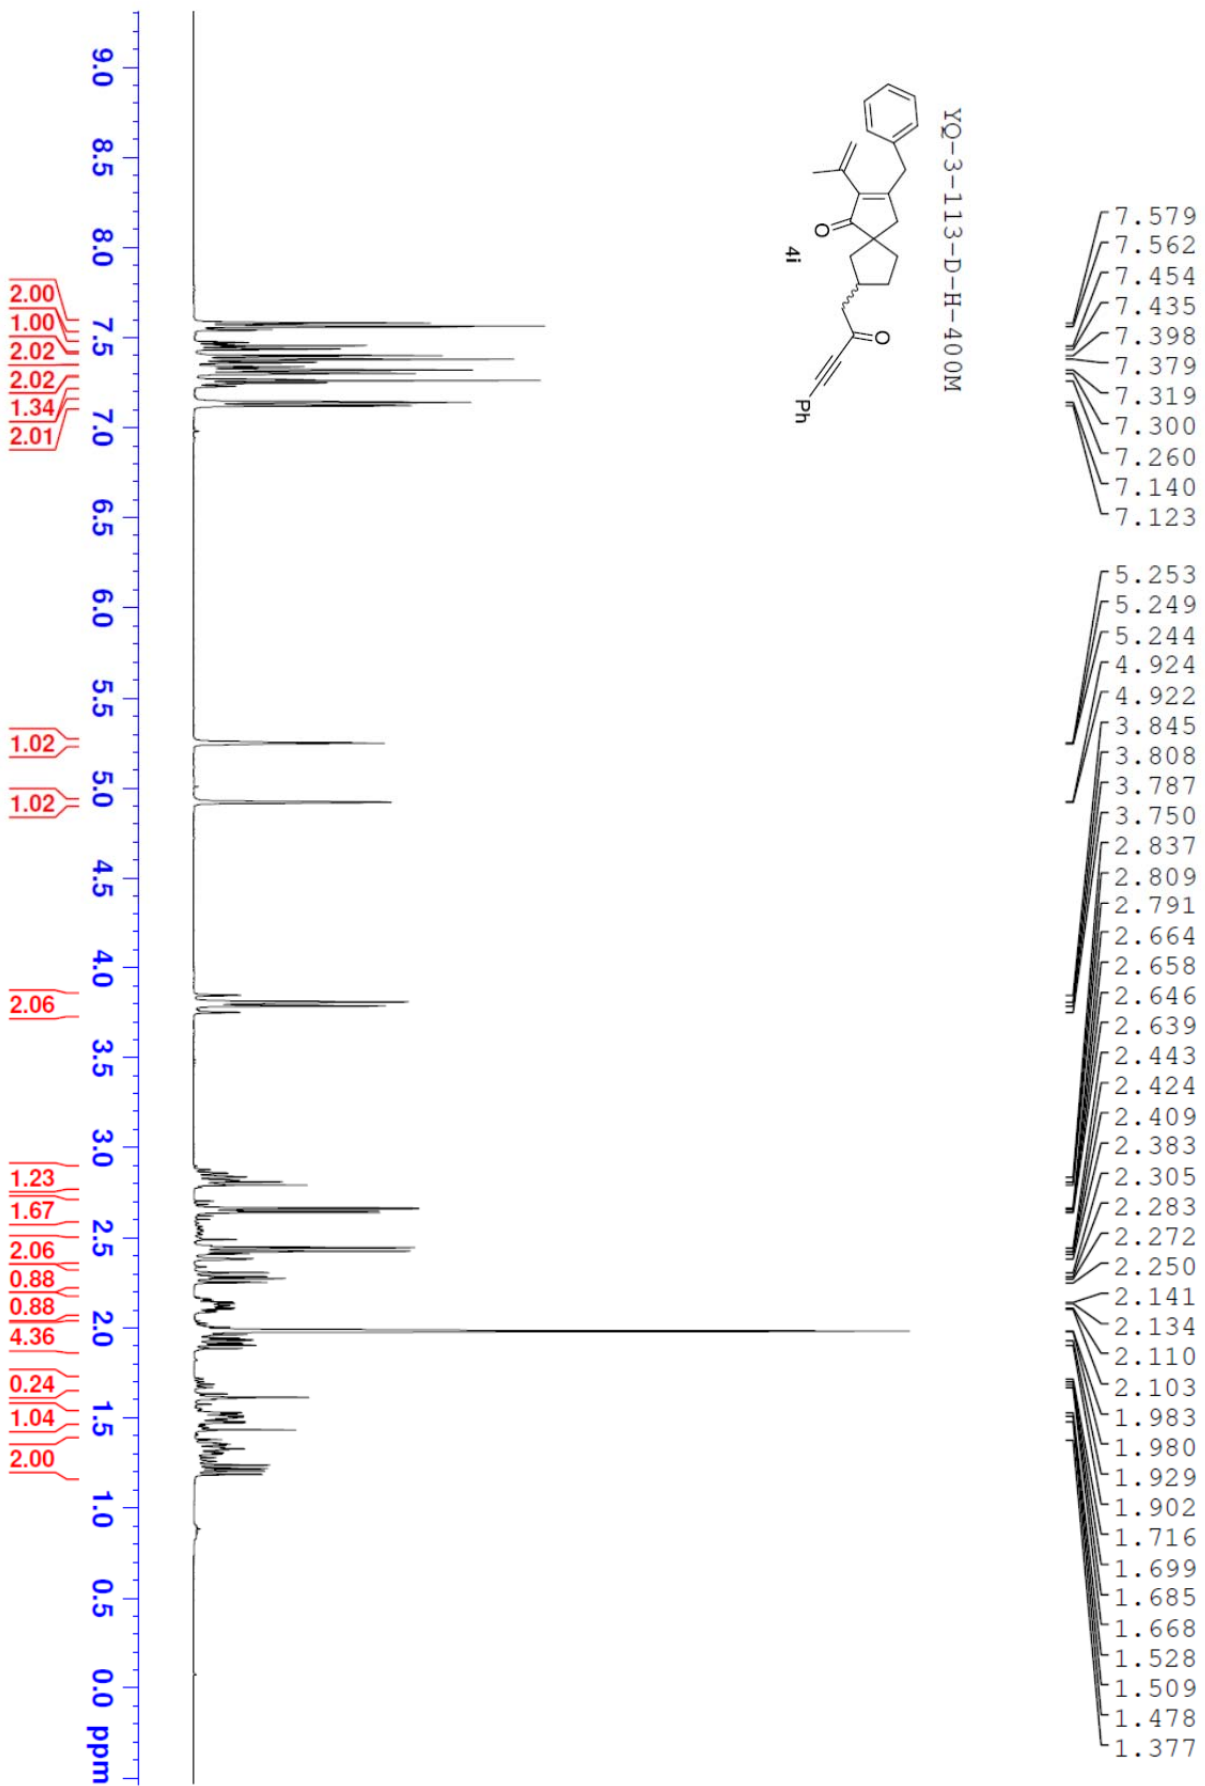

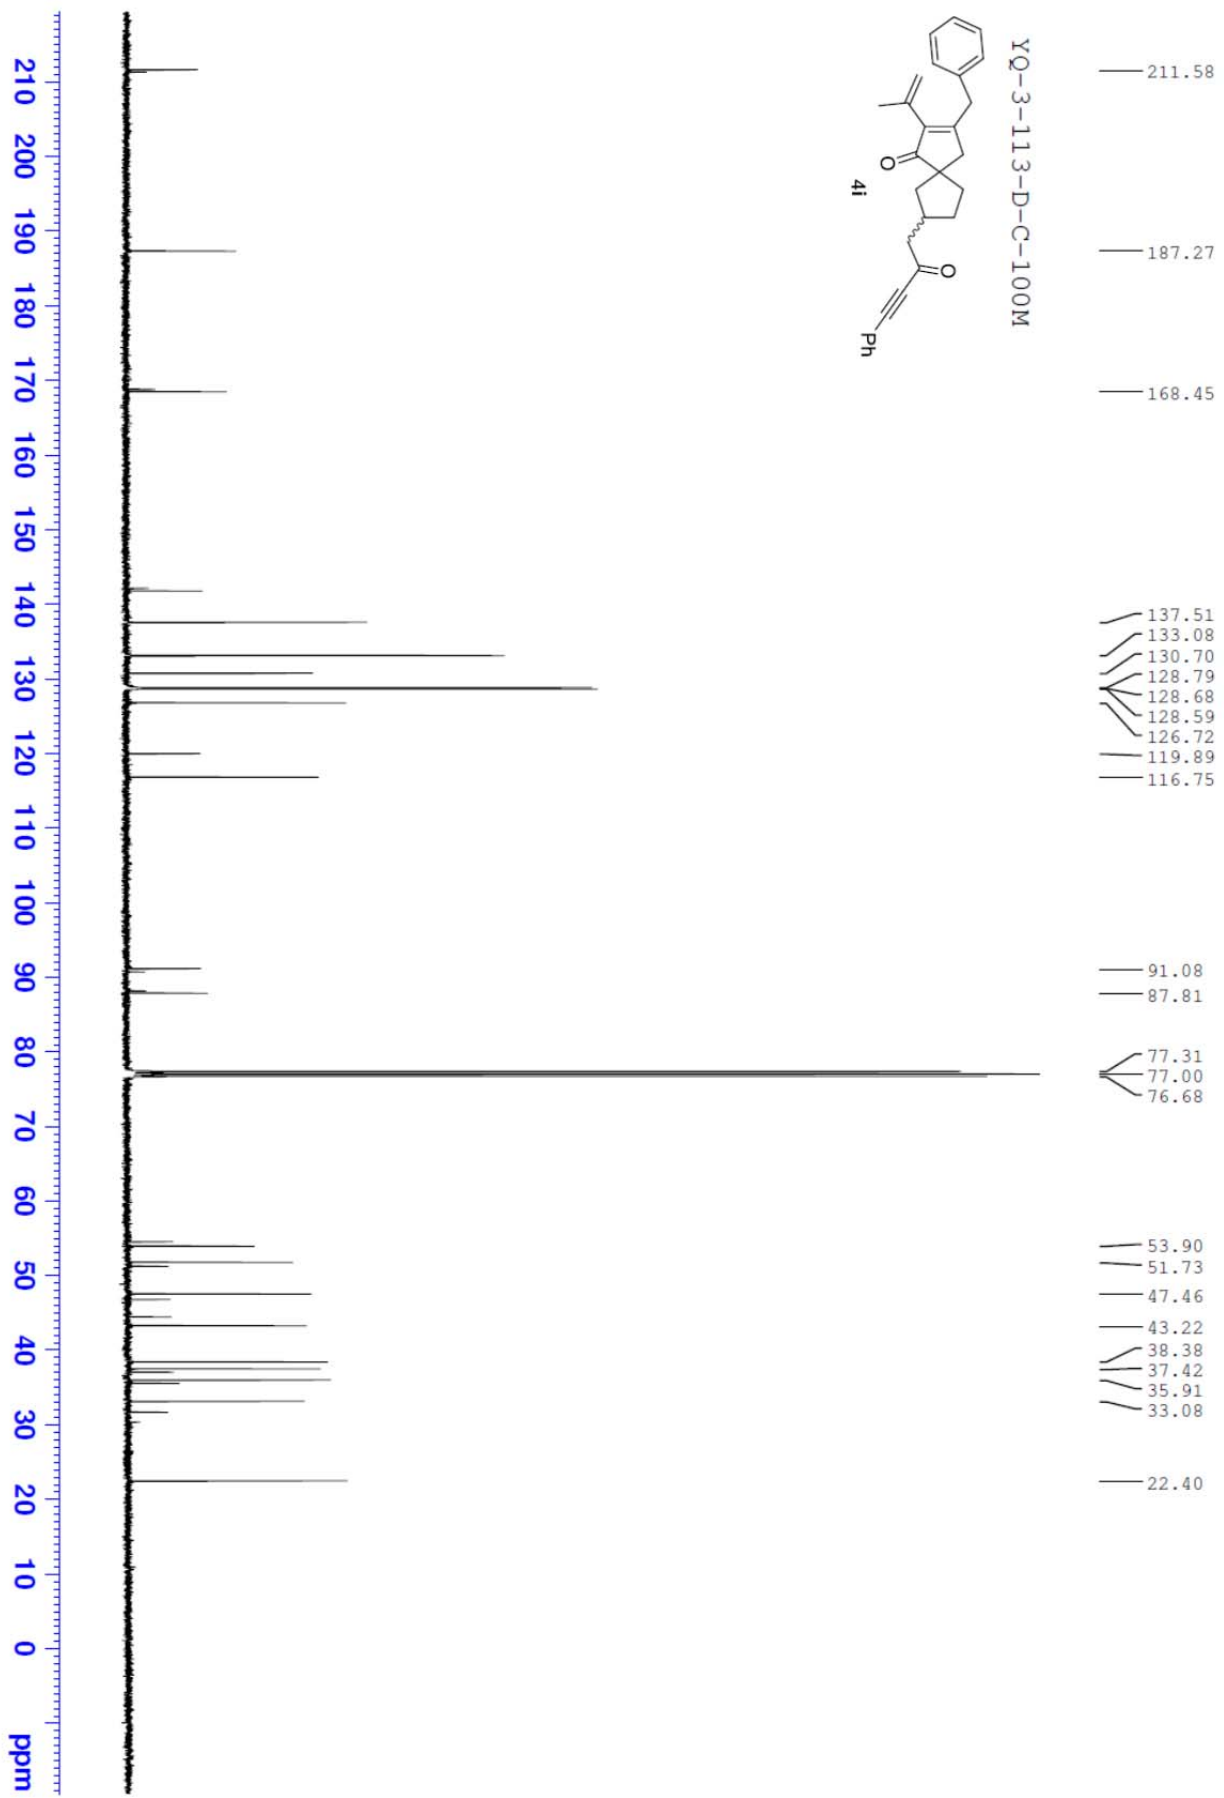

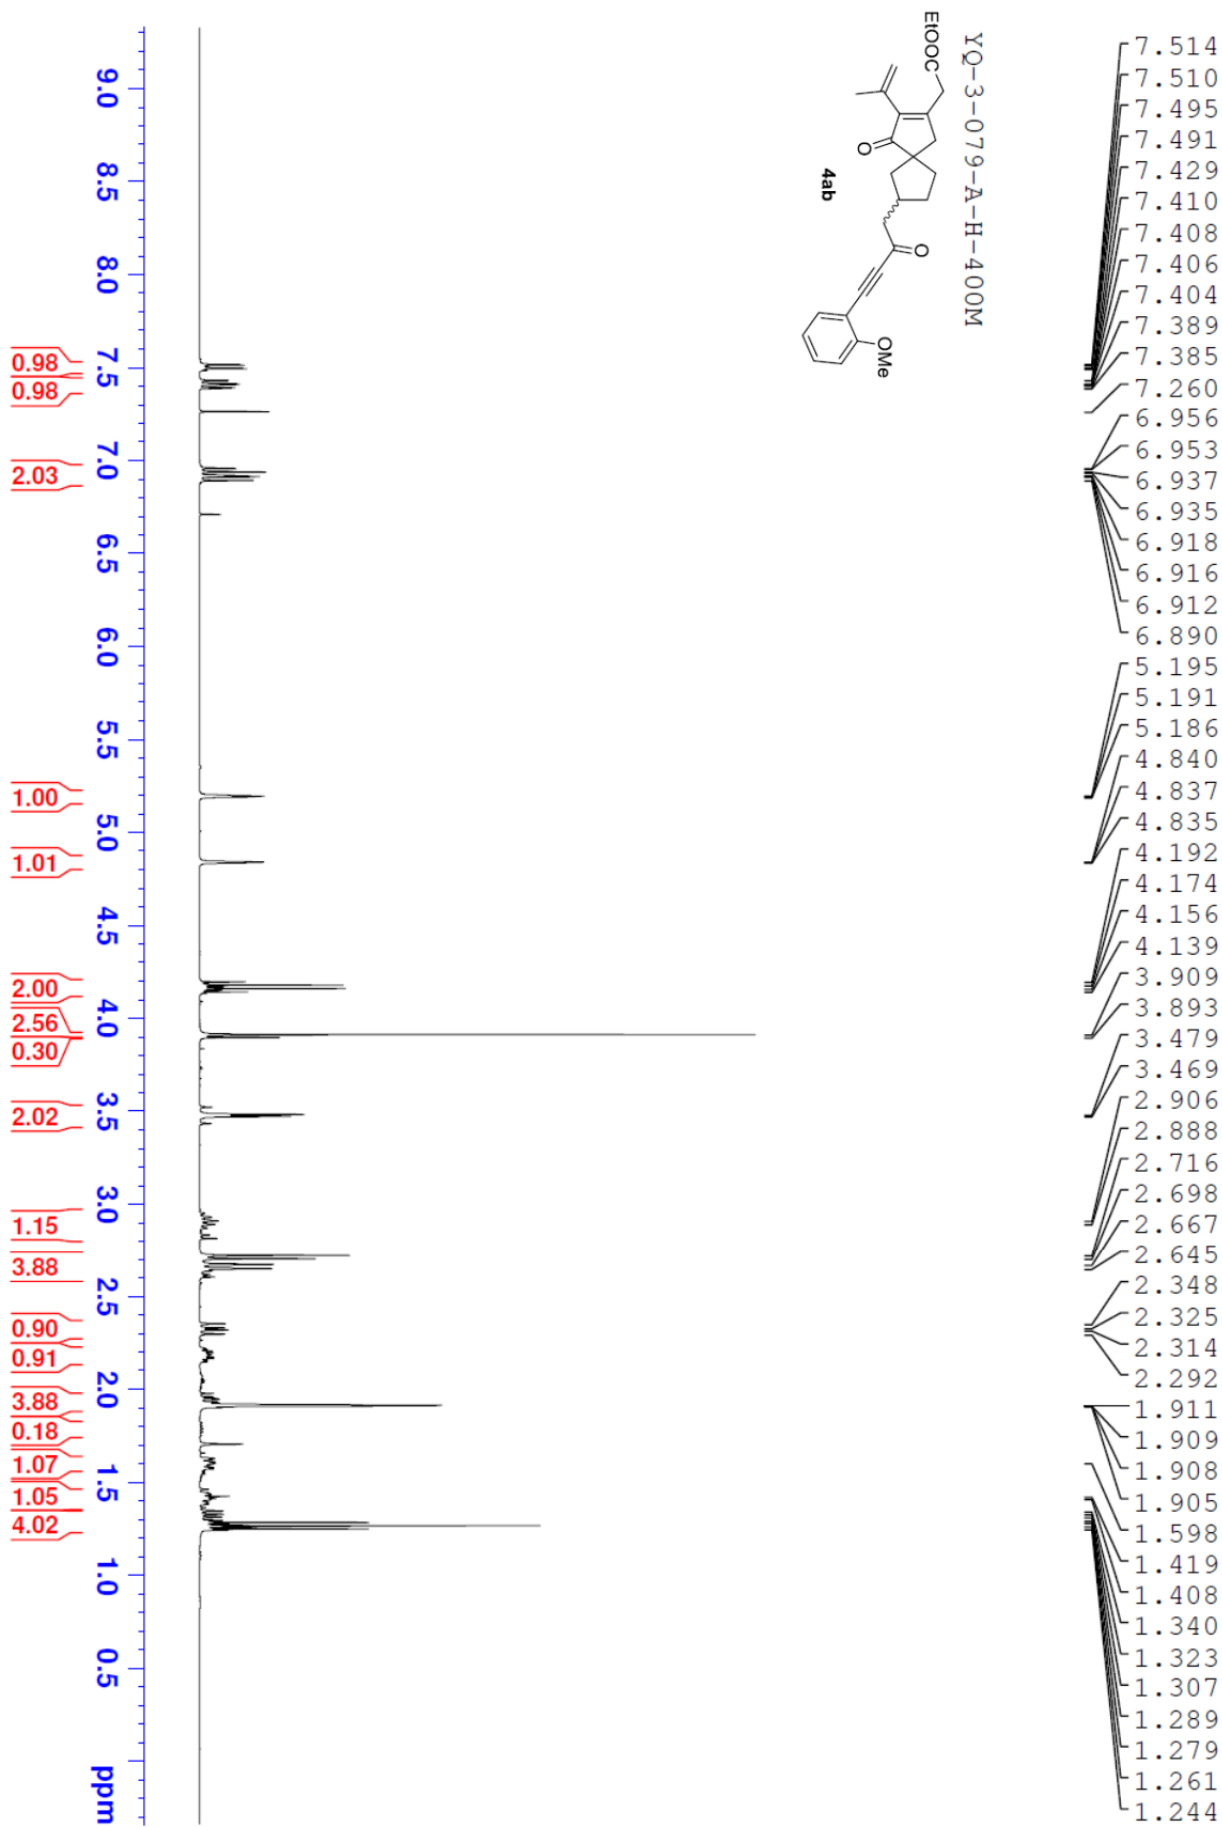

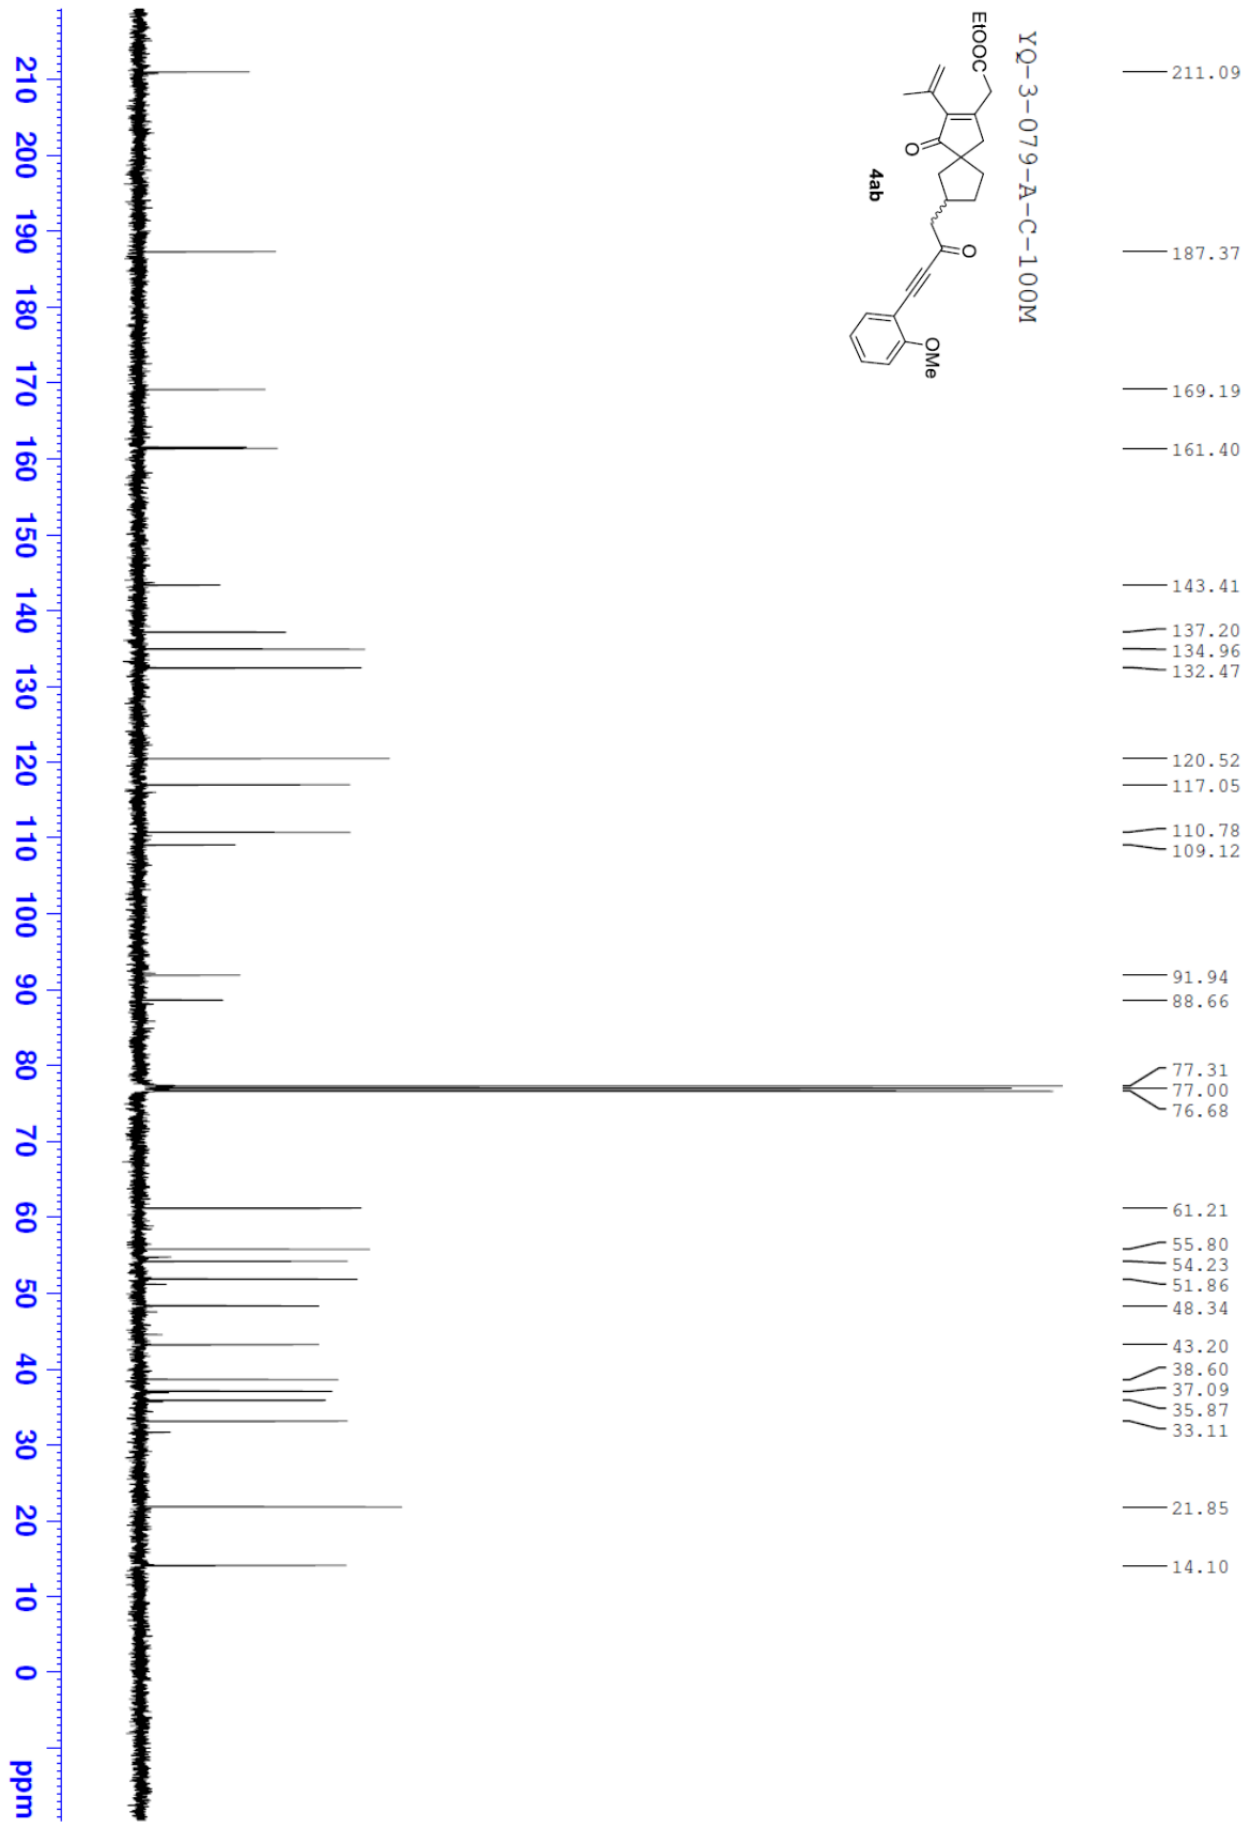

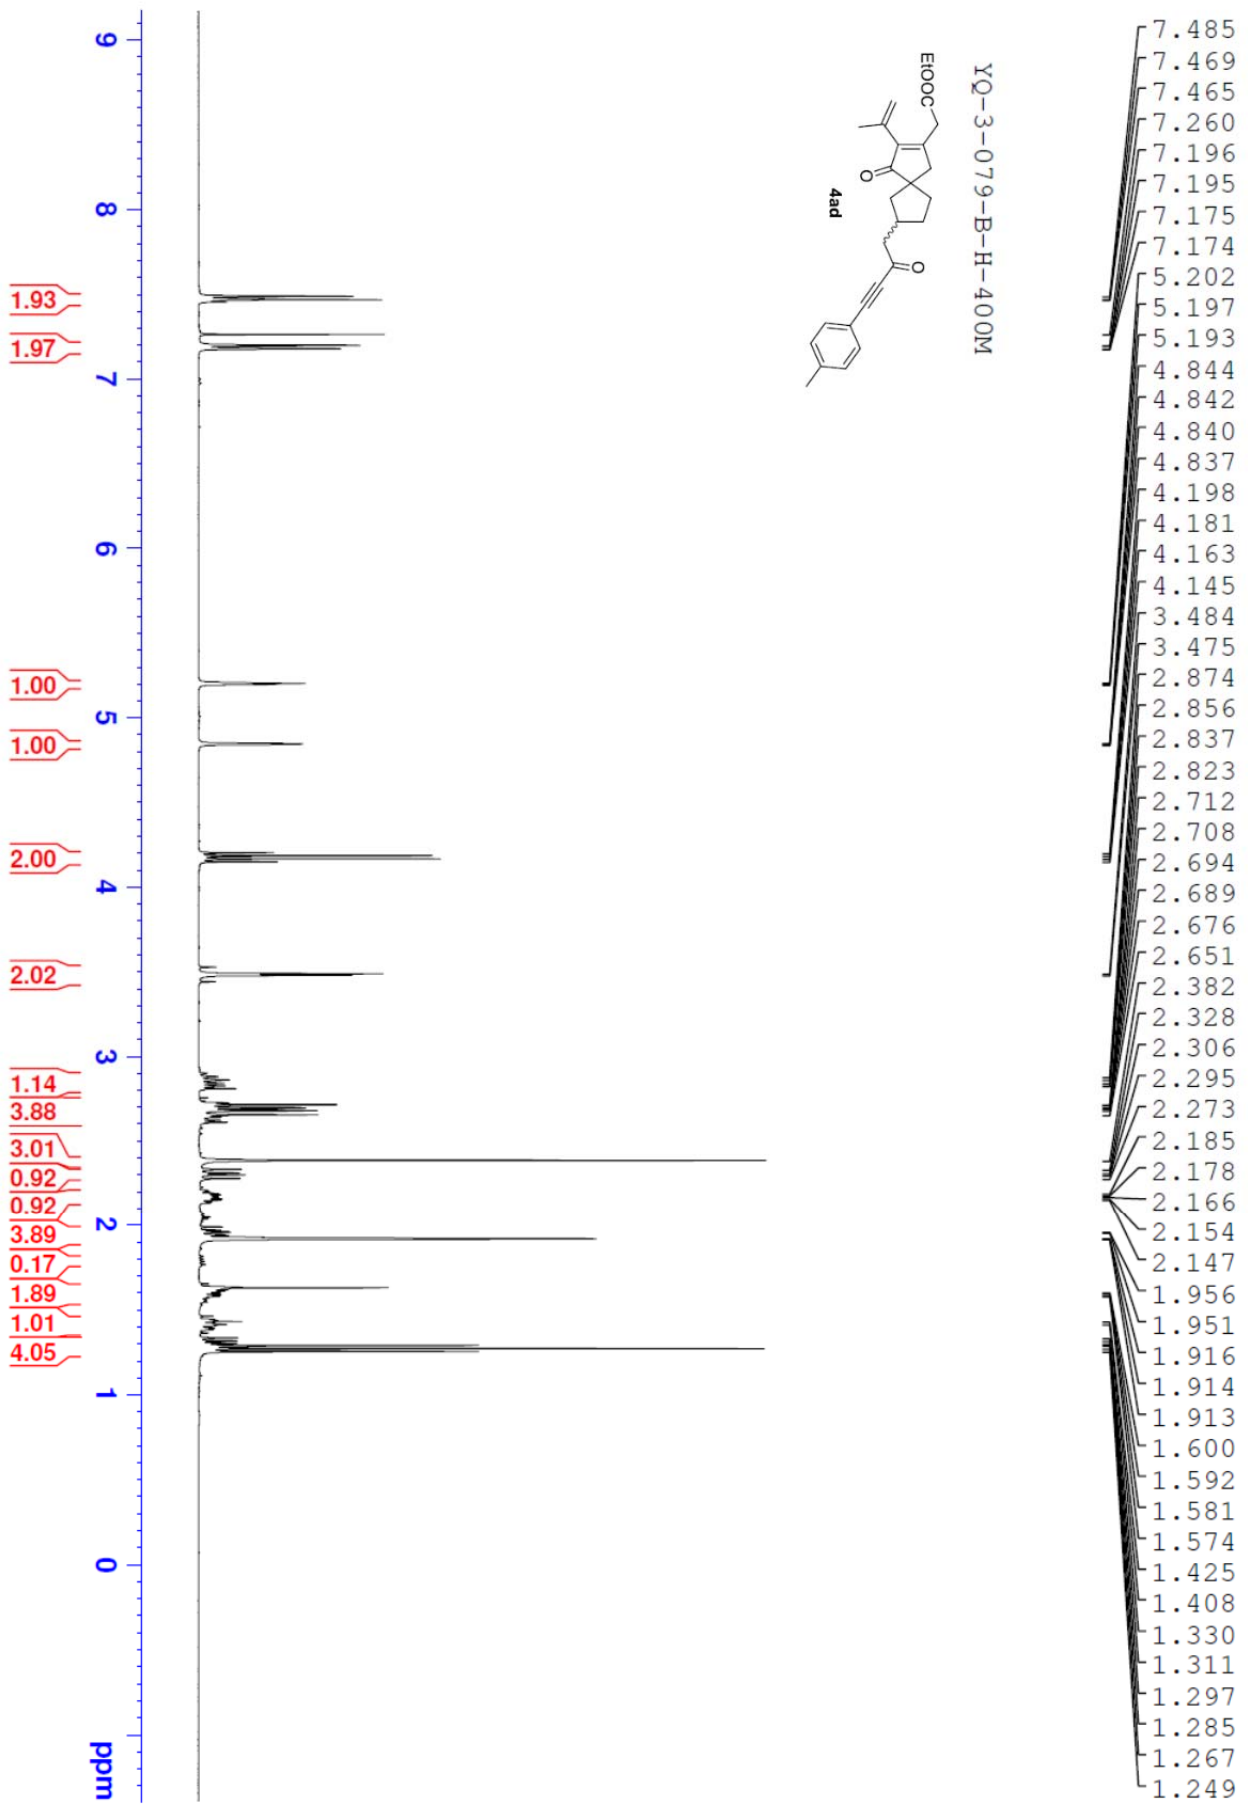

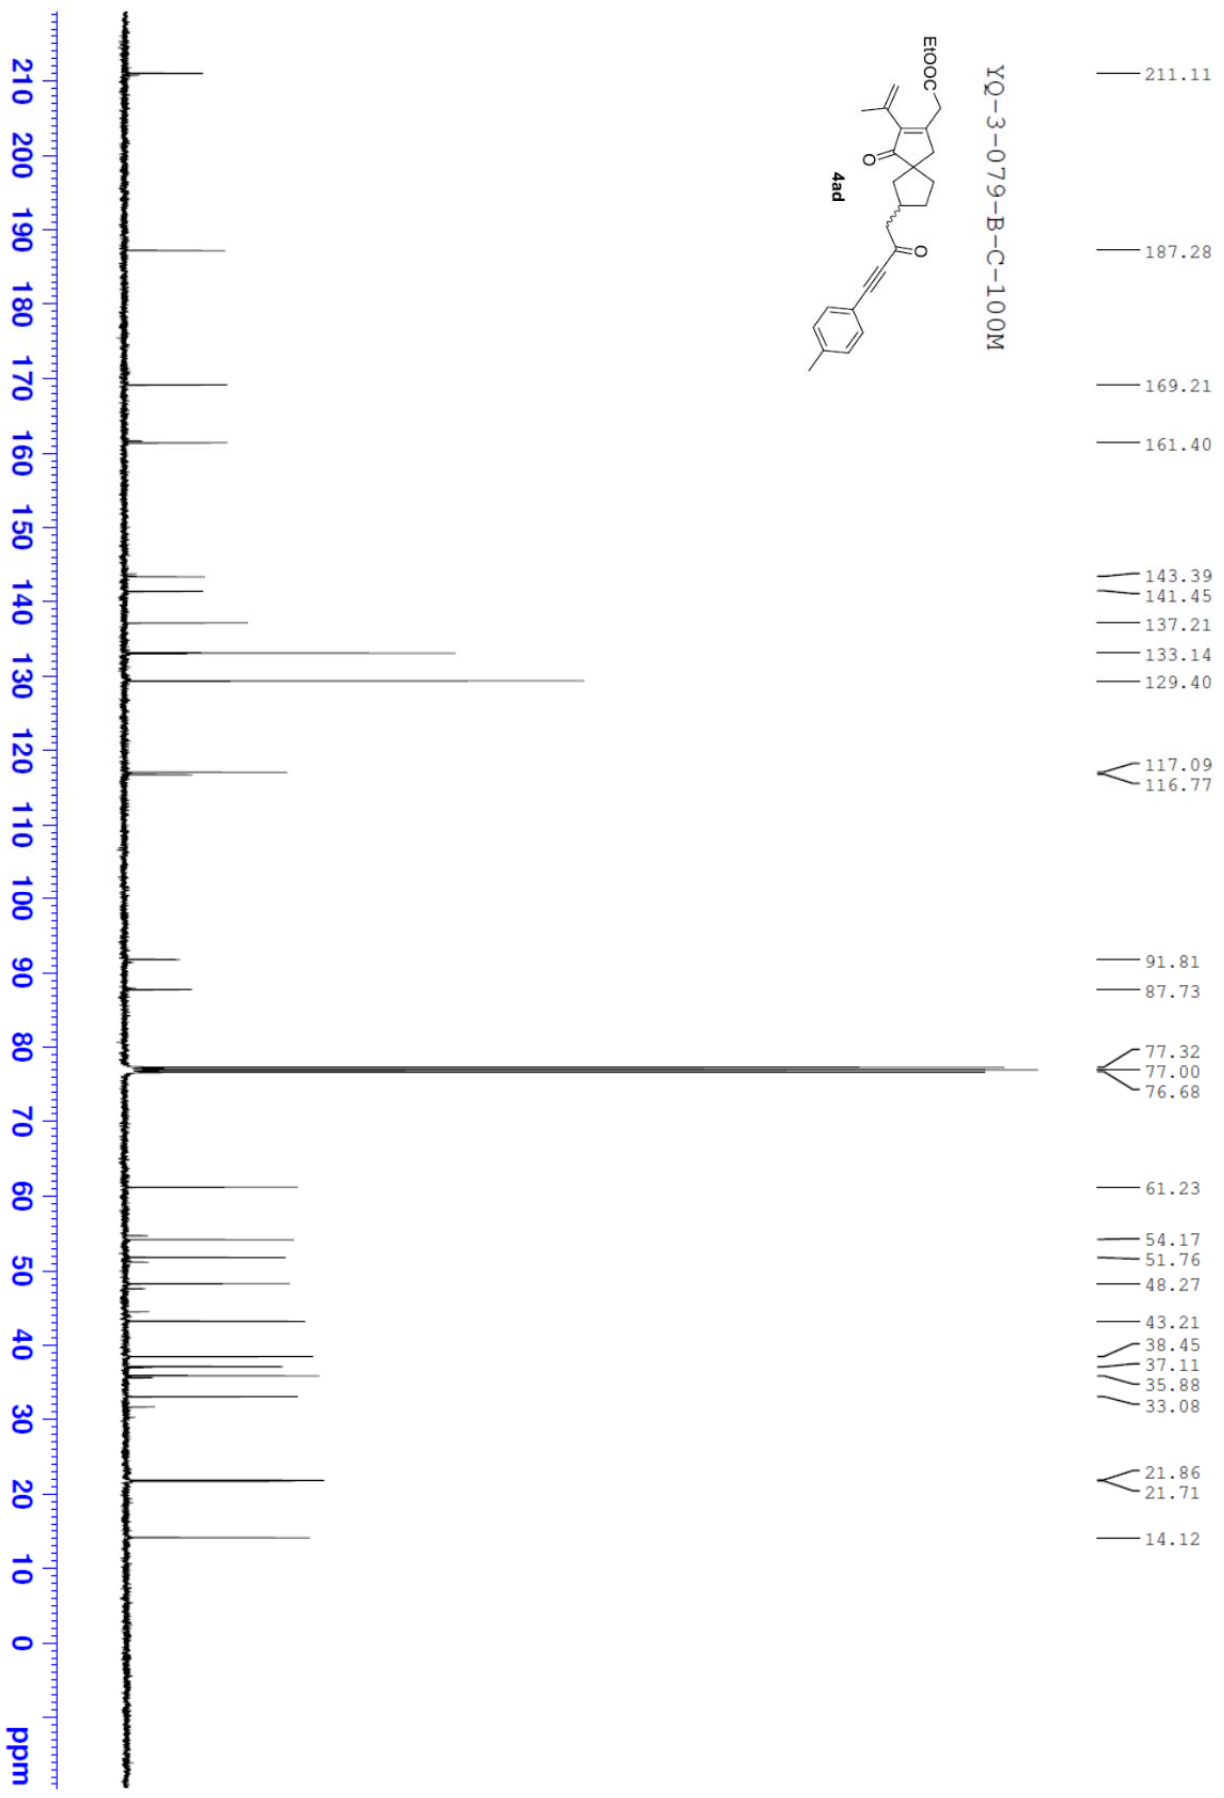



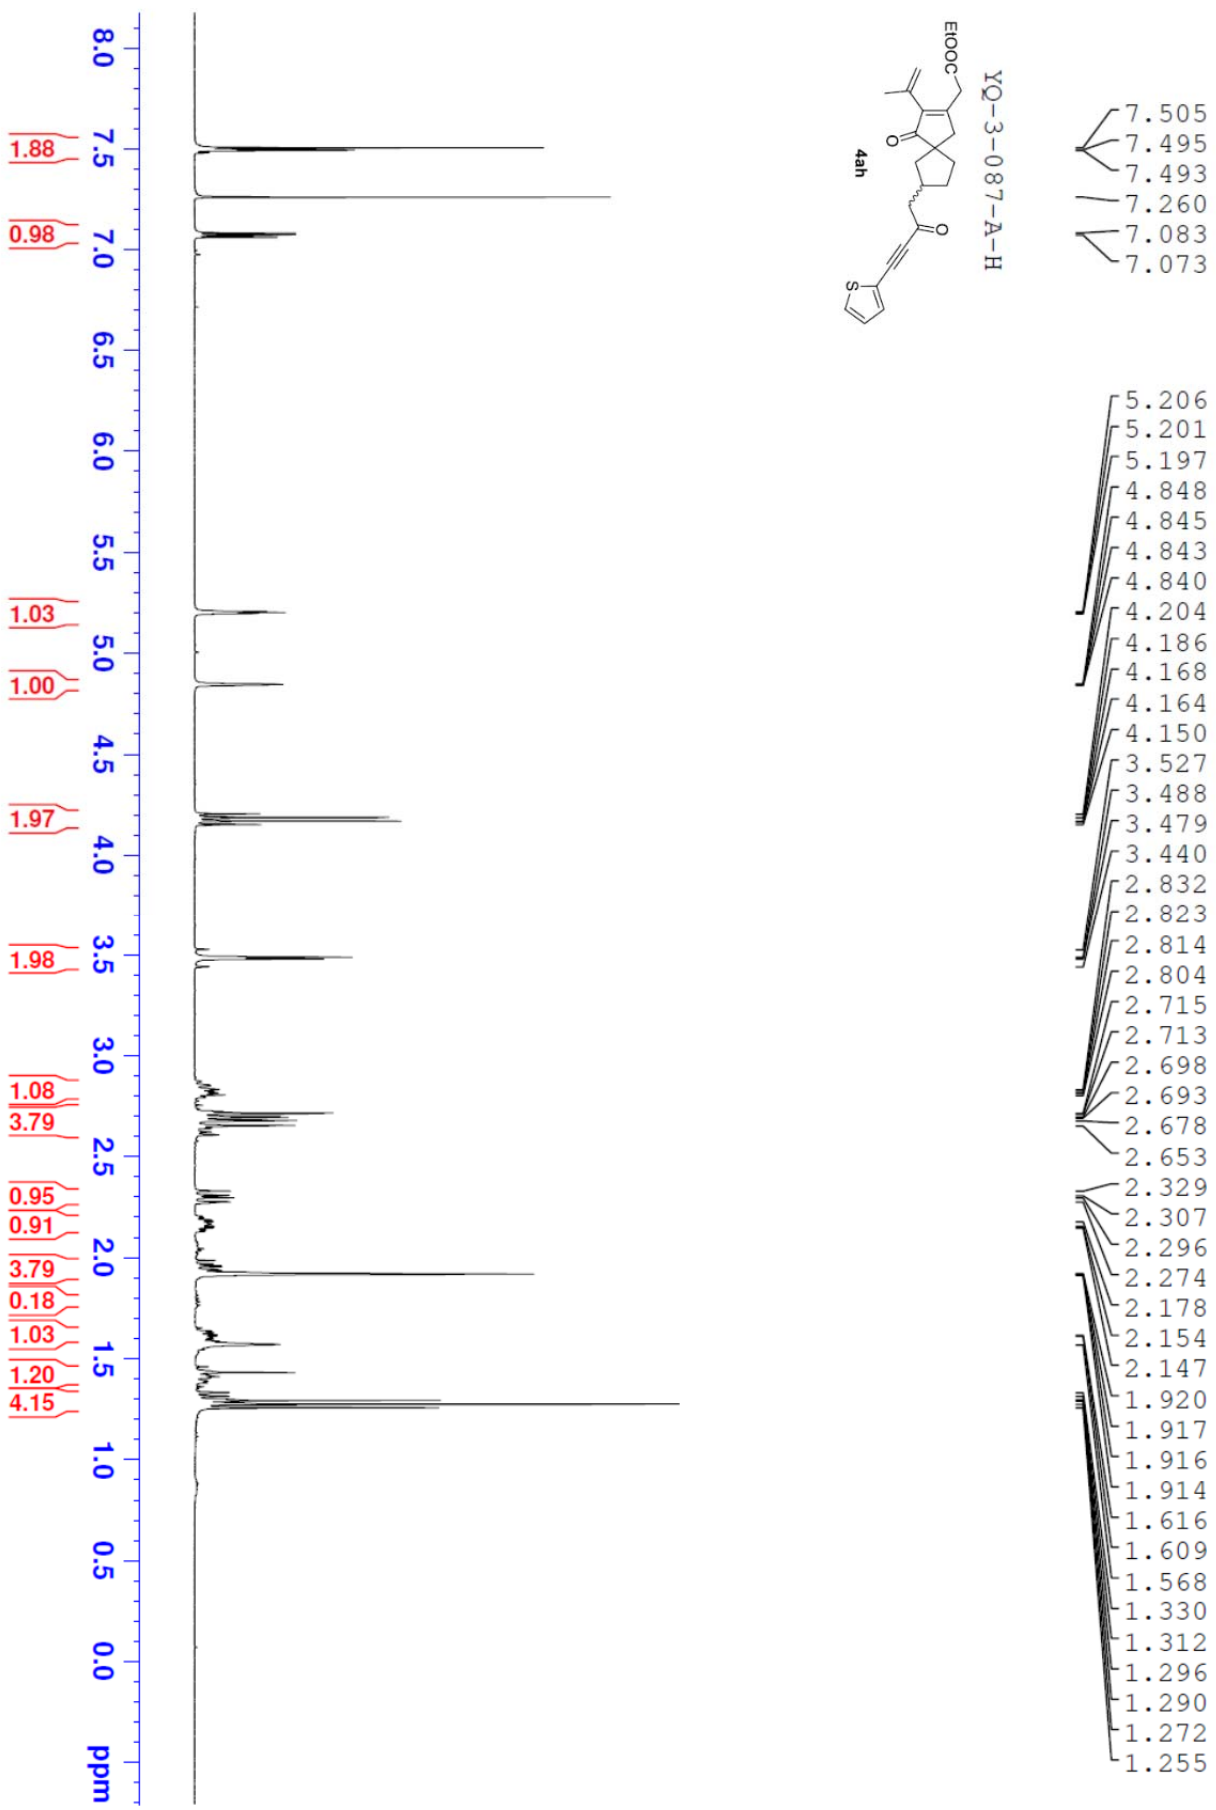

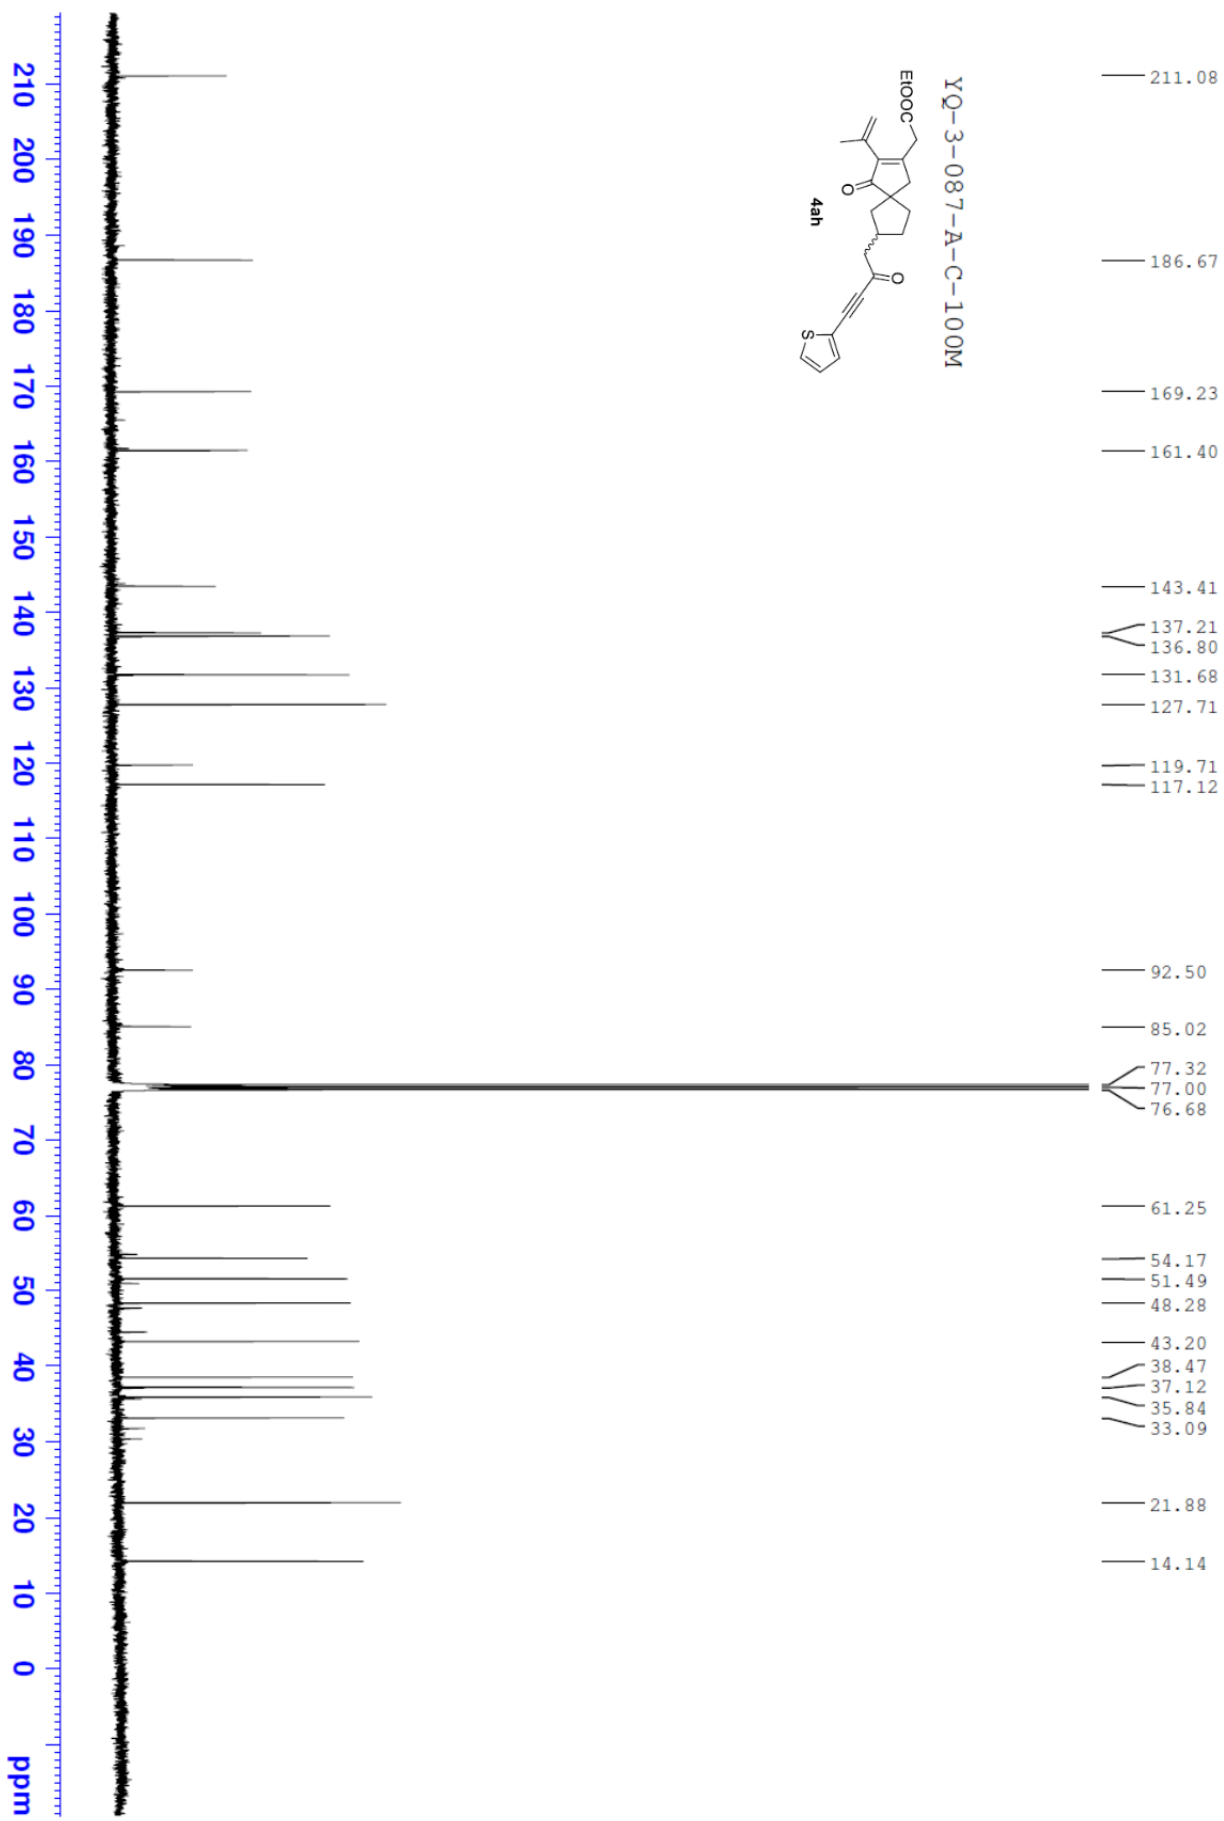

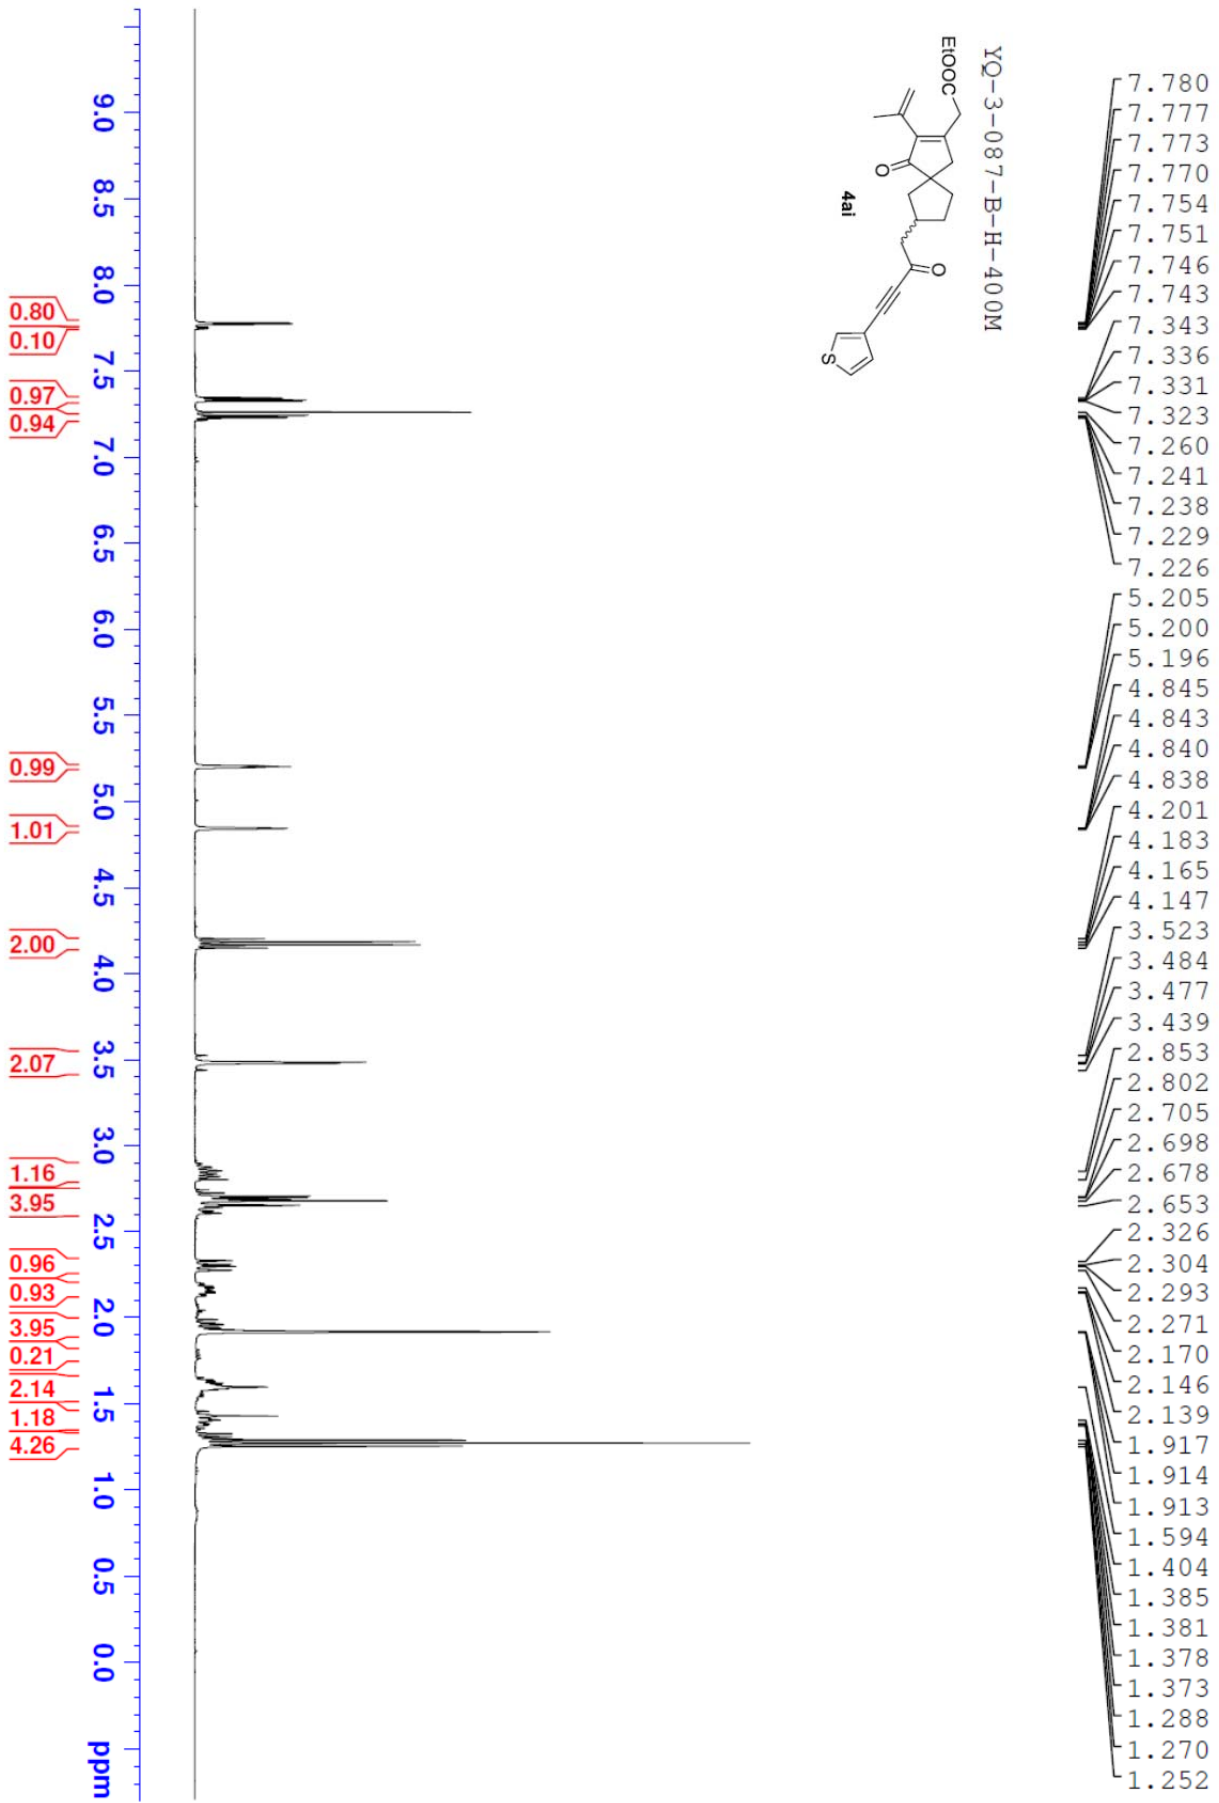

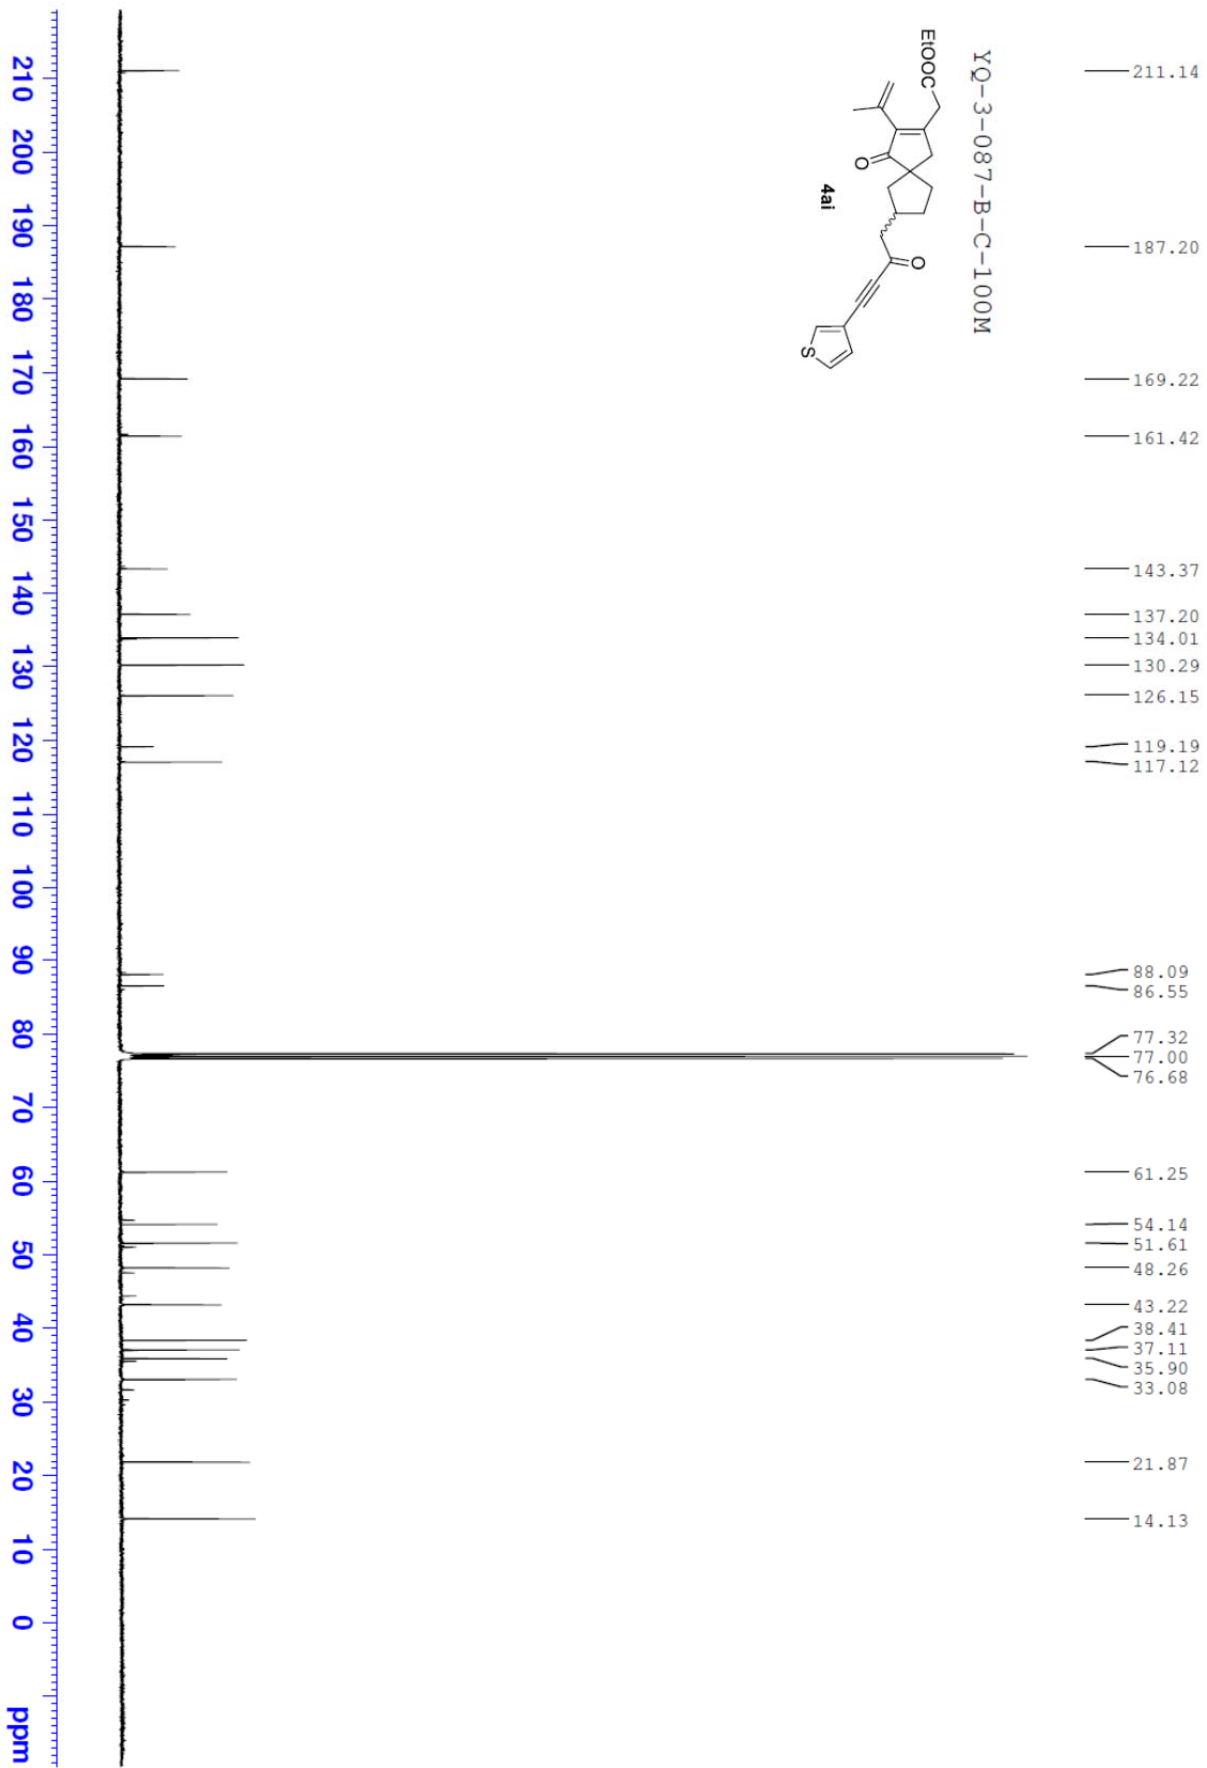

Supplement: ja6b09240_si_001.pdf [file ja6b09240_si_001.pdf]
